# Supplementary material for: Sodium silylsilanolate as a precursor of silylcopper species
Source: Royal Society of Chemistry journal article supplement (doi:10.1039/d2sc00227b), 2022-01-01
Supplement: d2sc00227b1.pdf [file d2sc00227b1.pdf]

Supplementary Information

## **Sodium Silylsilanolate as a Precursor of Silylcopper Species**

Hiroki Yamagishi, Kenshiro Hitoshio, Jun Shimokawa,\* and Hideki Yorimitsu\*

Department of Chemistry, Graduate School of Science, Kyoto University  
Sakyo-ku, Kyoto 606-8502, Japan

shimokawa@kuchem.kyoto-u.ac.jp  
yori@kuchem.kyoto-u.ac.jp

### **Table of Contents**

|                                             |         |
|---------------------------------------------|---------|
| Instrumentation and Chemicals               | S2–3    |
| Preparation of Reagents and Substrates      | S4–7    |
| Experimental Procedures                     | S8–9    |
| Computational Studies                       | S10–26  |
| Mass Spectroscopic Analysis of the Reaction | S27–28  |
| Characterization Data                       | S29–39  |
| Reference                                   | S40–41  |
| NMR Spectra                                 | S42–118 |

## Instrumentation and Chemicals

$^1\text{H}$  NMR (600 MHz),  $^{13}\text{C}$  NMR (151 MHz),  $^{19}\text{F}$  NMR (564 MHz) and  $^{29}\text{Si}$  NMR (119 MHz) spectra were recorded on a JEOL ECZ-600 spectrometer. Chemical shifts in  $^1\text{H}$  NMR spectra were recorded in delta ( $\delta$ ) units, parts per million (ppm) relative to residual  $\text{CHCl}_3$  ( $\delta = 7.26$  ppm),  $\text{C}_6\text{HD}_5$  ( $\delta = 7.15$  ppm) and  $\text{CHDCl}_2$  ( $\delta = 5.32$  ppm). Chemical shifts in  $^{13}\text{C}$  NMR spectra were recorded in delta ( $\delta$ ) units, parts per million (ppm) relative to  $\text{CDCl}_3$  ( $\delta = 77.00$  ppm),  $\text{C}_6\text{D}_6$  ( $\delta = 128.00$  ppm) and  $\text{CD}_2\text{Cl}_2$  ( $\delta = 53.800$  ppm). For  $^{19}\text{F}$  NMR spectra, fluorobenzene ( $^{19}\text{F}$ :  $\delta = -113.50$  ppm) was used as an external standard. For  $^{29}\text{Si}$  NMR spectra, tetramethylsilane ( $^{29}\text{Si}$ :  $\delta = 0.00$  ppm) was used as an external standard. The following abbreviations are used for spin multiplicity: s = singlet, d = doublet, t = triplet, q = quartet, m = multiplet. High resolution mass spectra (HRMS) were obtained on a Bruker micrOTOF II-KR spectrometer in Atmospheric Pressure Chemical Ionization (APCI or ESI) method using “LC/MS tuning mix, for APCI or ESI, low concentration” (Agilent Technologies, Inc.) as the internal standard. Melting points were determined on a Stanford Research Systems MPA100 melting point apparatus.

All non-aqueous reactions were carried out under an inert atmosphere of  $\text{N}_2$  gas in oven-dried glassware unless otherwise noted. Dehydrated toluene, acetonitrile, hexane and benzene were purchased from FUJIFILM Wako Pure Chemical Corporation and stored under nitrogen atmosphere. Dehydrated THF and  $\text{Et}_2\text{O}$  was purchased from Kanto Chemical Co., Inc. and stored under nitrogen atmosphere. Dehydrated DCE was purchased from Sigma-Aldrich Co. LLC and stored under nitrogen atmosphere.  $\text{CuCl}$  was purchased from Wako Pure Chemical Industries, Ltd., and purified by washing with aqueous  $\text{HCl}$  and stored in a glove box after drying.  $\text{NaH}$  was purchased from Tokyo Chemical Industry Co., Ltd., and used after being washed with hexane and stored under nitrogen atmosphere. *tert*-Butyl alcohol was purchased from Wako Pure Chemical Industries, Ltd., and used after being dried through storage over 4 Å molecular sieves.  $\text{CuCl}[\text{P}(\text{OPh})_3]^1$ ,  $\text{CuCl}(\text{bpy})^2$ ,  $\text{CuCl}(\text{dppe})^3$ ,  $\text{CuCl}(\text{IPr})^4$ , sodium trimethylsilyldimethylsilylanolate (**1-Me**)<sup>5</sup>, sodium benzyldimethylsilyldimethylsilylanolate (**1-Benzyl**)<sup>5</sup>, sodium allyldimethylsilyldimethylsilylanolate (**1-Allyl**)<sup>5</sup>, 1,2-bis(4-trifluoromethylphenyl)ethyne (**2b**)<sup>6</sup>, 1,2-bis(4-cyanophenyl)ethyne (**2c**)<sup>7</sup>, 1,2-bis(4-(*tert*-butoxycarbonyl)phenyl)ethyne (**2d**)<sup>8</sup>, 1,2-bis(4-ethoxycarbonylphenyl)ethyne (**2h**)<sup>9</sup>, 1,2-bis(4-fluorophenyl)ethyne (**2f**)<sup>10</sup>, 1,2-bis(4-chlorophenyl)ethyne (**2g**)<sup>10</sup>, 1,2-bis(4-methylphenyl)ethyne (**2h**)<sup>6</sup>, 1,2-bis(2-methylphenyl)-ethyne (**2i**)<sup>8</sup>, 1,2-bis(3-pyridinyl)ethyne (**2j**)<sup>11</sup>, 1,2-bis(2-thiophenyl)ethyne (**2k**)<sup>12</sup>, ((but-2-yn-1-yloxy)methyl)benzene (**2q**)<sup>13</sup>, (1-(pent-3-yn-1-yloxy)methyl)benzene (**2r**)<sup>14</sup>, and (methyl-1,2-propadienyl)cyclohexane (**2u**)<sup>15</sup> were

prepared according to the literature. All other reagents were commercially available and used without further purification unless otherwise noted. Analytical thin layer chromatography (TLC) was performed on Merck precoated analytical plates, 0.25-mm thick, silica gel 60 F<sub>254</sub>. Preparative flash chromatography was performed using Silica Gel (Wakosil<sup>®</sup> C-300 purchased from FUJIFILM Wako Pure Chemical Corporation). Preparative TLC was performed using silica gel (Merck 60PF<sub>254+365</sub>). Preparative recycling gel permeation chromatography (GPC) was performed on a JAI LC-9260 II NEXT system using CHCl<sub>3</sub> as the eluent.

## Preparation of Reagents and Substrates

### Preparation of 1-chloro-2-phenyl-1,1,2,2-tetramethyldisilane (S1)

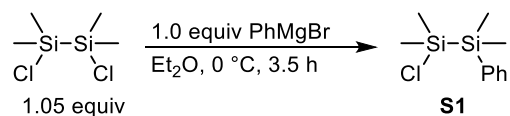

An oven-dried 500-mL round-bottomed flask equipped with a septum and a magnetic stir bar was charged with 1,2-dichloro-1,1,2,2-tetramethyldisilane (11.7 mL, 63.0 mmol) and Et<sub>2</sub>O (150 mL). After the mixture was stirred at 0 °C for 10 min, phenylmagnesium bromide (0.67 M in THF, 89.6 mL, 60.0 mmol) was added dropwise to the flask over 15 min. After the reaction was stirred for 3.5 h, pentane (150 mL) was added to the reaction mixture. The resulting suspension was filtered through Na<sub>2</sub>SO<sub>4</sub> and the filtrate was concentrated under reduced pressure. Distillation of the resulting residue under reduced pressure (56 °C/0.70 torr) provided **S1** (10.4 g, 45.3 mmol, 76%) as a colorless liquid.

### Preparation of 1-chloro-2-(4-methoxyphenyl)-1,1,2,2-tetramethyldisilane (S2)

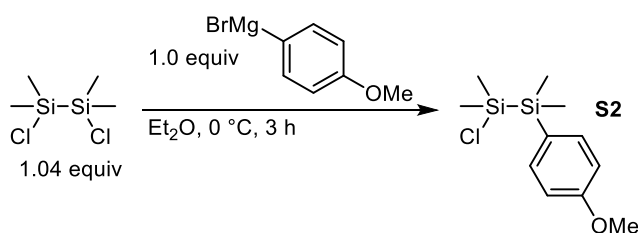

An oven-dried 500-mL round-bottomed flask equipped with a septum and a magnetic stir bar was charged with 1,2-dichloro-1,1,2,2-tetramethyldisilane (7.8 mL, 42.0 mmol) and Et<sub>2</sub>O (100 mL). After the mixture was stirred at 0 °C for 10 min, 4-methoxyphenylmagnesium bromide (0.82 M in THF, 48.8 mL, 40.0 mmol) was added dropwise to the flask over 10 min. After the reaction was stirred for 3 h, pentane (150 mL) was added to the reaction mixture. The resulting suspension was filtered through Na<sub>2</sub>SO<sub>4</sub> and the filtrate was concentrated under reduced pressure. Pentane (100 mL) was added to the residue and the filtration–concentration sequence was repeated again. Distillation of the resulting residue under reduced pressure (96–101 °C/0.90 torr) provided **S2** (8.40 g, 32.4 mmol, 81%) as a colorless liquid.

### Preparation of 1-chloro-2-trimethylsiloxy-1,1,2,2-tetramethyldisilane (S3)

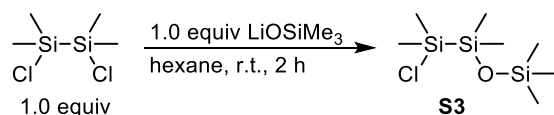

**S3** was prepared according to the literature procedure with some modifications.<sup>16</sup> An oven-dried 500-mL round-bottomed flask equipped with a septum and a magnetic stir bar was charged with 1,2-dichloro-1,1,2,2-tetramethyldisilane (18.5 mL, 100 mmol) and hexane (400 mL). After lithium trimethylsilylanolate (9.61 g, 100 mmol) was added to the flask at room temperature, the reaction mixture was stirred for 2 h. Hexane (100 mL) was added to the reaction mixture. The resulting suspension was filtered, and the filtrate was concentrated under reduced pressure. Distillation of the resulting residue under reduced pressure (55–58 °C/9 torr) provided **S3** (14.2 g, 59.1 mmol, 59%) as a colorless liquid.

### Preparation of 2-phenyl-1,1,2,2-tetramethyldisilan-1-ol (S4) and 2-(4-methoxyphenyl)-1,1,2,2-tetramethyldisilan-1-ol (S5)

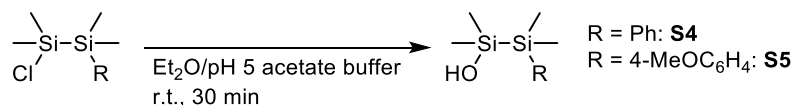

The synthesis of 2-phenyl-1,1,2,2-tetramethyldisilan-1-ol (**S4**) is representative. An open 300-mL round-bottomed flask equipped with a magnetic stir bar was charged with pH 5 acetate buffer (100 mL, 1.0 M) and Et<sub>2</sub>O (20 mL) and the reaction mixture was stirred at room temperature under air. A solution of 1-chloro-2-phenyl-1,1,2,2-tetramethyldisilane (4.71 mL, 20.0 mmol) in Et<sub>2</sub>O (16 mL) was added dropwise over 5 min. After 30 min, the mixture was poured into a separatory funnel with Et<sub>2</sub>O (30 mL) and partitioned. The organic phase was collected, and the aqueous phase was extracted with Et<sub>2</sub>O (30 mL). The combined organic extract was neutralized by washing with saturated NaHCO<sub>3</sub> aq. (30 mL). The organic layer was dried over Na<sub>2</sub>SO<sub>4</sub> and concentrated under reduced pressure at 30 °C. The resulting residue was purified by column chromatography on silica gel (hexane/Et<sub>2</sub>O = 4/1) to afford silanol **S4** (3.59 g, 17.1 mmol, 85%) as a colorless liquid.

## Preparation of 1-Ph

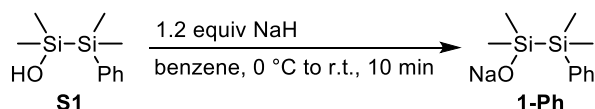

An oven-dried 50-mL round-bottomed flask equipped with a septum and a magnetic stir bar was charged with NaH (288 mg, 12.0 mmol) and benzene (5 mL). 2-phenyl-1,1,2,2-tetramethyldisilan-1-ol (**S4**, 2.20 mL, 10.0 mmol) was added dropwise at 0 °C to the mixture. The reaction mixture was warmed to room temperature over 5 min and stirring was continued for 10 min. The resulting suspension was filtered through a sintered glass filter under nitrogen atmosphere and the filtrate was concentrated under reduced pressure. The obtained powder was dissolved in hexane (6.0 mL) under nitrogen atmosphere and cooled to -78 °C to form the precipitate. The liquid phase was removed via cannulation and the remaining solid was dried under reduced pressure to provide **1-Ph** (1.80 g, 7.73 mmol, 77%) as a white powder.

## Preparation of 1-Ans

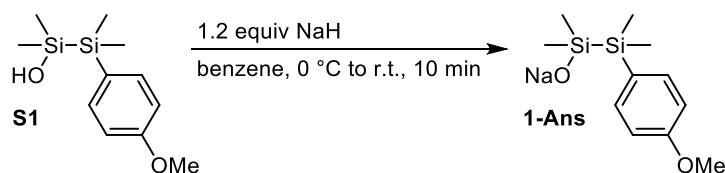

An oven-dried 50-mL round-bottomed flask equipped with a septum and a magnetic stir bar was charged with NaH (288 mg, 12.0 mmol) and benzene (8 mL). 2-(4-Methoxyphenyl)-1,1,2,2-tetramethyldisilan-1-ol (**S5**, 2.40 mL, 10.0 mmol) was added dropwise at 0 °C to the mixture. The reaction mixture was warmed to room temperature over 5 min and stirring was continued for 10 min. The resulting suspension was filtered through a sintered glass filter under nitrogen atmosphere. The filtrate was concentrated under reduced pressure to provide **1-Ans** (2.30 g, 8.78 mmol, 88%) as a white powder.

## Preparation of 1-OSiMe<sub>3</sub>

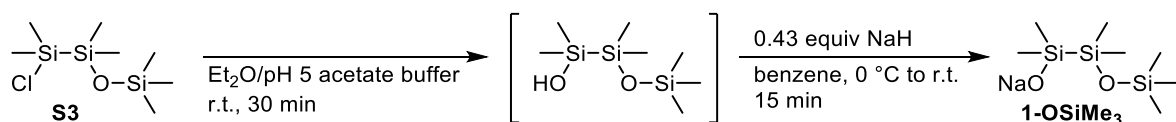

An open 200-mL round-bottomed flask equipped with a magnetic stir bar was charged with pH 5 acetate buffer (50 mL, 1.0 M) and Et<sub>2</sub>O (12.5 mL) and the reaction mixture was stirred at room temperature under air. Solution of 1-chloro-2-trimethylsiloxy-1,1,2,2-tetramethyldisilane (**S3**, 2.70 mL, 10.0 mmol) in Et<sub>2</sub>O (7 mL) was added dropwise over 5 min. After 30 min, the mixture was poured into a separatory funnel with Et<sub>2</sub>O (20 mL) and partitioned. The organic

phase was collected, and the aqueous phase was extracted with Et<sub>2</sub>O (20 mL). The combined organic extract was neutralized by washing with saturated NaHCO<sub>3</sub> aq. (20 mL). The organic layer was dried over Na<sub>2</sub>SO<sub>4</sub> and concentrated under reduced pressure at room temperature. The resulting residue was immediately purified by column chromatography on silica gel (hexane/Et<sub>2</sub>O = 4/1). The combined fractions were concentrated under reduced pressure at 35 °C to afford 2-trimethylsiloxy-1,1,2,2-tetramethyldisilan-1-ol (788 mg, 3.54 mmol).

An oven-dried 30-mL round-bottomed flask equipped with a septum and a magnetic stir bar was charged with NaH (101 mg, 4.25 mmol) and benzene (5 mL). The solution of 2-trimethylsiloxy-1,1,2,2-tetramethyldisilan-1-ol in benzene (2 mL) was added dropwise at 0 °C to the mixture. The reaction mixture was warmed to room temperature over 5 min and stirring was continued for 10 min. The resulting suspension was filtered through a sintered glass filter under nitrogen atmosphere. The filtrate was concentrated under reduced pressure to provide **1-OSiMe<sub>3</sub>** (584 mg, 2.40 mmol, 24%) as a white powder.

## Experimental Procedure

### General Procedure for Copper-Catalyzed Hydrosilylation of Alkynes with **1-Me** (Table 1, Scheme 1, Scheme 2)

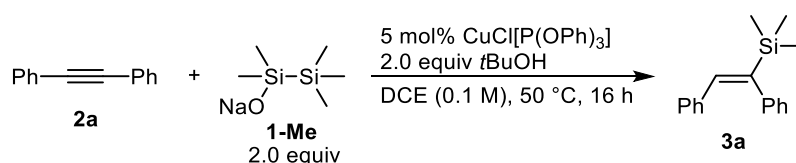

The silylation of diphenylacetylene (**2a**) is representative. An oven-dried 20-mL Schlenk tube equipped with a greaseless stopcock and a magnetic stir bar was charged with CuCl[P(OPh)<sub>3</sub>] (10.2 mg, 0.0250 mmol), diphenylacetylene (**2a**, 89.0 mg, 0.499 mmol), **1-Me** (170 mg, 1.00 mmol), DCE (3.0 mL) and *t*BuOH (94.9 μL, 1.00 mmol). DCE (2.0 mL) was added to the mixture to rinse the inside wall of the tube. The resulting mixture was stirred at 50 °C. After 16 h, the reaction was quenched with saturated NH<sub>4</sub>Cl aq. (10 mL). The mixture was poured into a separatory funnel with Et<sub>2</sub>O (20 mL) and water (30 mL) and partitioned. The organic phase was collected, and the aqueous phase was extracted with Et<sub>2</sub>O (20 mL × 2). The combined organic extract was washed with brine (10 mL), dried over Na<sub>2</sub>SO<sub>4</sub> (ca. 10 g), filtered, and concentrated under reduced pressure. The residue was purified by column chromatography on silica gel (hexane only), and then GPC (eluent: CHCl<sub>3</sub>) to give **3a** (107.3 mg, 0.425 mmol, 86%) as a colorless oil.

### Stability Evaluation of Silylsilanolate under Air (toluene solution)<sup>17</sup>

A vial equipped with a septum and a magnetic stir bar was charged with sodium trimethylsilyldimethylsilanolate (**1-Me**, 34.1 mg, 0.200 mmol) and toluene (1.0 mL) under air. The vial was connected to a balloon filled with air through a needle. The mixture was stirred for a designated time at room temperature. The mixture was concentrated under reduced pressure and the yield of the recovered **1-Me** was analyzed by <sup>1</sup>H NMR analysis using 1,3,5-trimethoxybenzene as an internal standard.

| Time  | NMR Yield [%] |
|-------|---------------|
| 1 min | 89            |
| 48 h  | 87            |



## Reaction Using Chiral Phosphine Ligands for Enantioselective Hydrosilylation of **2s**

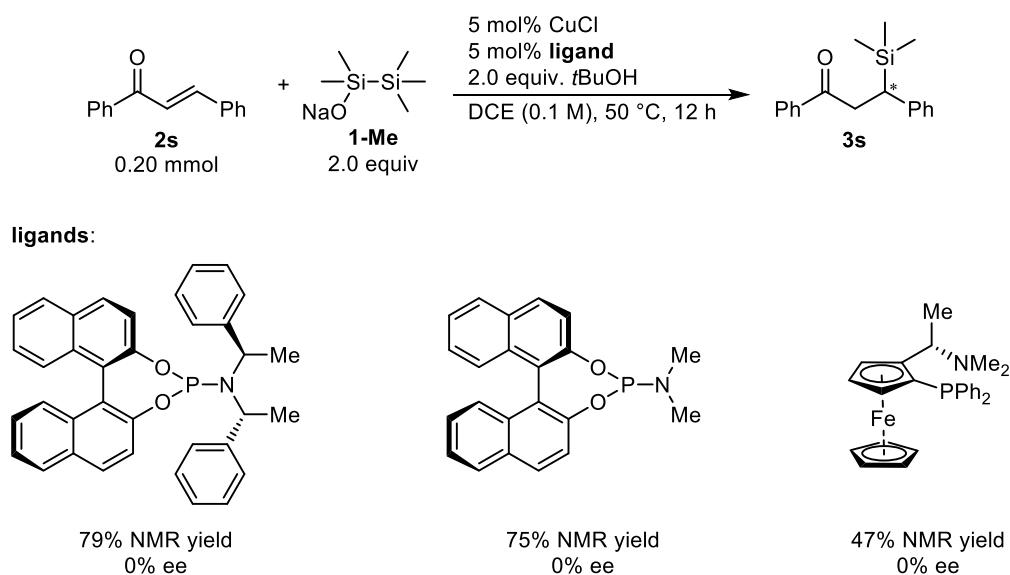

An oven-dried 20-mL Schlenk tube equipped with a septum and a magnetic stir bar was charged with a chiral phosphine ligand (0.010 mmol), CuCl (27.5 mg, 0.010 mmol) and DCE (0.30 mL). The mixture was stirred at room temperature for 30 min to give a solution of the copper complex. Another oven-dried 20-mL Schlenk tube equipped with a septum and a magnetic stir bar was charged with **2s** (41.7 mg, 0.20 mmol), **1-Me** (68.1 mg, 0.40 mmol) and DCE (0.60 mL). The mixture was stirred at room temperature for 5 min. After the solution of the copper complex (0.30 mL) was added to the mixture, and the Schlenk tube that contained the copper complex was washed with DCE (0.20 mL  $\times$  3) and the solution was added to the reaction mixture. *t*BuOH (38.0  $\mu$ L, 0.40 mmol) was added and the inside wall of the tube was rinsed with DCE (0.50 mL). The resulting mixture was stirred at 50 °C. After 16 h, the reaction was quenched with saturated NH<sub>4</sub>Cl aq. (5 mL). The mixture was poured into a separatory funnel with Et<sub>2</sub>O (10 mL) and water (15 mL) and partitioned. The organic phase was collected, and the aqueous phase was extracted with Et<sub>2</sub>O (10 mL  $\times$  2). The combined organic extract was washed with brine (5 mL), dried over Na<sub>2</sub>SO<sub>4</sub> (ca. 5 g), filtered, and concentrated under reduced pressure. The part of the residue was purified by preparative TLC (hexane/EtOAc = 10/1). The enantioselectivity of the obtained hydrosilylated product **3s** was analyzed by HPLC (HPLC: Column: DAICEL CHIRALPAK IA (4.6 mm  $\times$  250 mm), Eluent: hexane/*i*PrOH = 90:10, Flow rate: 1.0 ml/min, Detection: 254 nm, Retention time:  $t_1 = 3.95$  min,  $t_2 = 4.35$  min).

## Computational Studies

### General Computational Information

Preliminary structures of transition states were obtained at the level of B3LYP-D3BJ/def2-SVP<sup>18,19,20</sup> by using GRRM17 program<sup>21</sup> associated with Gaussian16 program.<sup>22</sup> All transition states and equilibrium structures were calculated at the level of B3LYP-D3BJ /def2-SVP in the gas-phase by using Gaussian16 program followed by frequency calculations to confirm their identity as either first-order saddle points or local minima. Intrinsic reaction coordinate (IRC) calculations were performed to ensure that the transition states found connected the corresponding reactants and products. Free energies at the optimized structures described in all energy diagrams were calculated at the level of  $\omega$ B97X-D/def2-TZVP<sup>23</sup> with solvation effect of 1,2-dichloroethane (DCE) modeled by SMD<sup>24</sup> method at 323.15 K including a concentration correction (as the 1 mol L<sup>-1</sup> standard state, 1.89 kcal mol<sup>-1</sup> was added to every species). All geometries of equilibrium structures and transition states are contained in the XYZ file. To simplify the calculations, the ligand was modeled as 2,2'-bipyridyl and sodium trimethylsilanolate dimer was used as an activator. Images were generated by using CYLview.<sup>25</sup>

We independently tried to evaluate a pathway for the migration with the assistance of sodium trimethylsilanolate monomer. However, the transition state could not be located.

The relative energies of INT-C1 and INT-C2 are summarized in Figure S1. DFT calculations revealed that the sum of free energies of silylsilanolate-coordinated copper complex and sodium *tert*-butoxide is almost the same as that of *tert*-butoxide-coordinated copper complex and sodium trimethylsilyldimethylsilanolate. These results indicated that the ligand exchange between alkoxide and siloxide on the copper atom could be reversible in the current system.

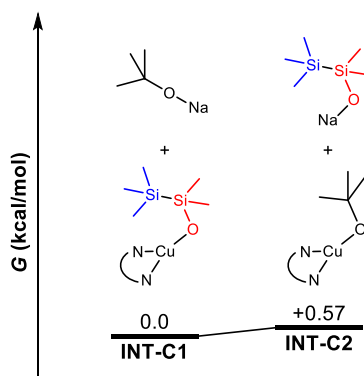

Figure S1. Free energies of INT-C1 and INT-C2

We hypothesized that copper *tert*-butoxide could react with sodium silylsilanolate to afford silylcopper without going through silylsilanolate-coordinated copper(I), accompanied with elimination of silanolate containing siloxane moiety. Thus, the pathway was calculated, but transition state could not be located (Figure S2).

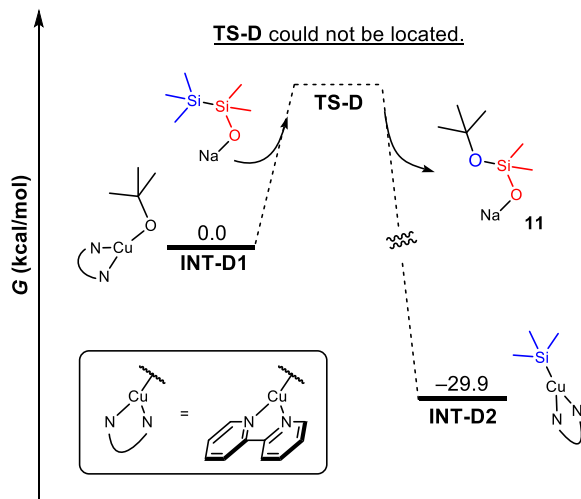

**Figure S2. Energy profile of the transmetalation between copper *tert*-butoxide and sodium trimethylsilylsilanolate**

We calculated a pathway for the migration of the silyl group with the assistance of sodium *tert*-butoxide dimer in place of sodium trimethylsilylsilanolate dimer (Figure S3). The activation barrier required for this pathway is 28.4 kcal/mol, which is a little higher than that required for the migration pathway with the assist of sodium trimethylsilylsilanolate dimer.

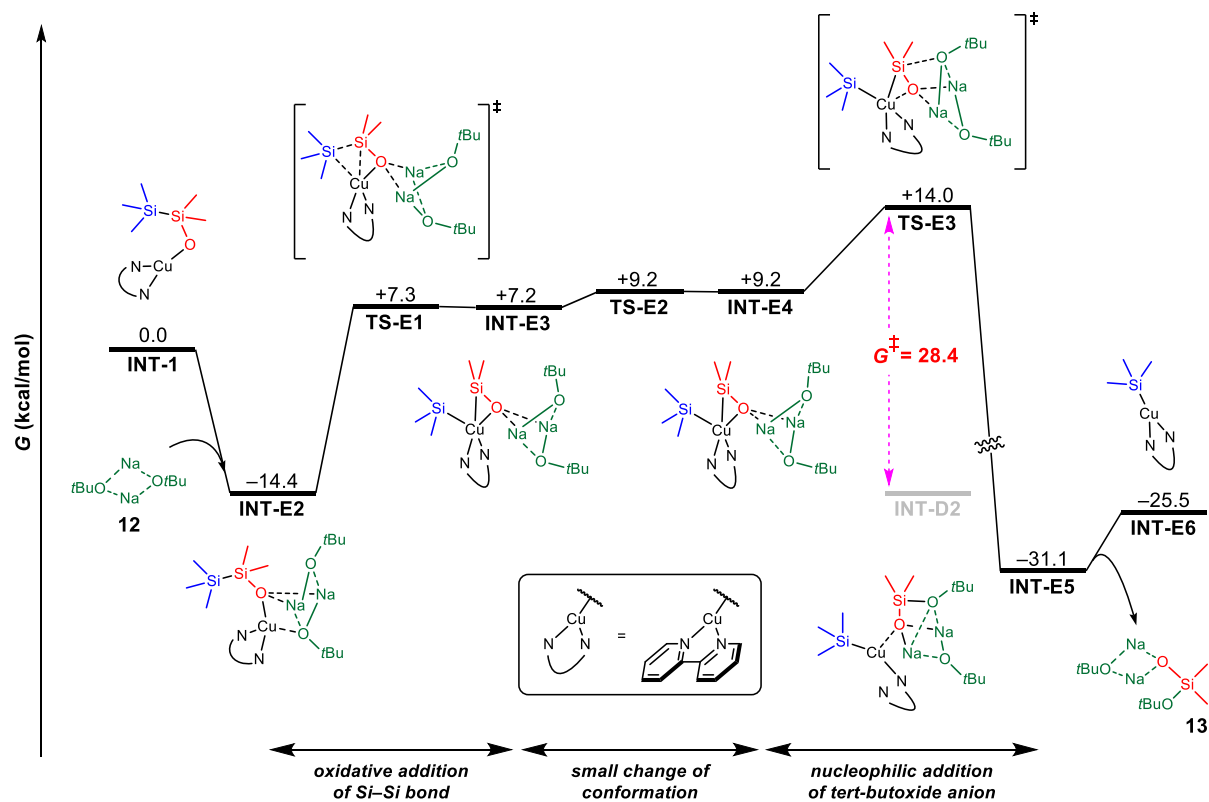

Figure S3. Energy profile of the migration pathway of the silyl group with the assist of sodium *tert*-butoxide dimer

**Electronic Energy and Thermal Free Energies for Each Structure in Figure 4, S2, SX, and SX (in Hartree, B3LYP-D3BJ/def2-SVP level of theory)**

| Species                                | Electronic Energy | Thermal Free Energy |
|----------------------------------------|-------------------|---------------------|
| <b>INT-1</b>                           | -2989.048715      | -2988.760059        |
| <b>TS-A1</b>                           | -2989.027185      | -2988.734556        |
| <b>INT-A2</b>                          | -2989.027300      | -2988.736299        |
| <b>dimethylsilanone</b>                | -444.384426       | -444.338694         |
| <b>INT-B2</b>                          | -4282.463371      | -4281.972187        |
| <b>TS-B1</b>                           | -4282.430114      | -4281.933326        |
| <b>INT-B3</b>                          | -4282.430426      | -4281.934209        |
| <b>TS-B2</b>                           | -4282.429138      | -4281.933169        |
| <b>INT-B4</b>                          | -4282.482380      | -4281.988391        |
| <b>TS-B3</b>                           | -4282.420847      | -4281.927558        |
| <b>INT-B5</b>                          | -4282.482380      | -4281.988391        |
| <b>9</b>                               | -1293.326337      | -1293.154193        |
| <b>10</b>                              | -1737.847217      | -1737.597712        |
| <b>CuSiMe<sub>3</sub>(bpy)</b>         | -2544.573764      | -2544.355308        |
| <b>NaOtBu</b>                          | -395.183893       | -395.093170         |
| <b>NaOSi<sub>2</sub>Me<sub>5</sub></b> | -1015.847701      | -1015.703961        |
| <b>CuOtBu(bpy)</b>                     | -2368.383212      | -2368.148972        |
| <b>11</b>                              | -839.500819       | -839.540940         |
| <b>INT-E2</b>                          | -3779.608078      | -3779.092421        |
| <b>TS-E1</b>                           | -3779.567117      | -3779.046697        |
| <b>INT-E3</b>                          | -3779.567363      | -3779.047970        |
| <b>TS-E2</b>                           | -3779.566920      | -3779.045882        |
| <b>INT-E4</b>                          | -3779.566934      | -3779.048060        |
| <b>TS-E3</b>                           | -3779.561861      | -3779.044007        |
| <b>INT-E5</b>                          | -3779.626433      | -3779.106703        |
| <b>12</b>                              | -790.472915       | -790.273911         |
| <b>13</b>                              | -1234.991070      | -1234.716252        |

**Electronic Energy and Thermal Free Energies for Each Structure in Figure 4 and S2 (in Hartree,  $\omega$ B97X-D/def2-TZVP/SMD (DCE)// B3LYP-D3BJ/def2-SVP level of theory)**

| Species                                | Electronic Energy | Thermal Free Energy | Corrected Thermal Free Energy |
|----------------------------------------|-------------------|---------------------|-------------------------------|
| <b>INT-1</b>                           | -2989.971138      | -2989.673785        | -2989.670431                  |
| <b>TS-A1</b>                           | -2989.950617      | -2989.649662        | -2989.646308                  |
| <b>INT-A2</b>                          | -2989.950044      | -2989.651153        | -2989.647799                  |
| <b>dimethylsilanone</b>                | -444.604938       | -444.556313         | -444.5529586                  |
| <b>INT-B2</b>                          | -4283.881006      | -4283.372367        | -4283.369013                  |
| <b>TS-B1</b>                           | -4283.855283      | -4283.346593        | -4283.343239                  |
| <b>INT-B3</b>                          | -4283.855464      | -4283.346204        | -4283.34285                   |
| <b>TS-B2</b>                           | -4283.854898      | -4283.345100        | -4283.341746                  |
| <b>INT-B4</b>                          | -4283.854842      | -4283.348081        | -4283.344727                  |
| <b>TS-B3</b>                           | -4283.838773      | -4283.331320        | -4283.327966                  |
| <b>INT-B5</b>                          | -4283.908390      | -4283.401078        | -4283.397724                  |
| <b>9</b>                               | -1293.866364      | -1293.682650        | -1293.679296                  |
| <b>10</b>                              | -1738.583598      | -1738.324381        | -1738.321027                  |
| <b>CuSiMe<sub>3</sub>(bpy)</b>         | -2545.297673      | -2545.072751        | -2545.069397                  |
| <b>NaO<i>t</i>Bu</b>                   | -395.415815       | -395.323768         | -395.3204136                  |
| <b>NaOSi<sub>2</sub>Me<sub>5</sub></b> | -1016.265892      | -1016.114737        | -1016.111383                  |
| <b>CuO<i>t</i>Bu(bpy)</b>              | -2369.121334      | -2368.881906        | -2368.878552                  |
| <b>11</b>                              | -839.932516       | -839.971522         | -839.9681676                  |
| <b>INT-E2</b>                          | -3780.909313      | -3780.381300        | -3780.377946                  |
| <b>TS-E1</b>                           | -3780.877239      | -3780.346624        | -3780.34327                   |
| <b>INT-E3</b>                          | -3780.877464      | -3780.346638        | -3780.343284                  |
| <b>TS-E2</b>                           | -3780.876632      | -3780.343636        | -3780.340282-                 |
| <b>INT-E4</b>                          | -3780.876386      | -3780.343576        | -3780.340222                  |
| <b>TS-E3</b>                           | -3780.864172      | -3780.335972        | -3780.332618                  |
| <b>INT-E5</b>                          | -3780.937151      | -3780.407913        | -3780.404559                  |
| <b>12</b>                              | -790.893047       | -790.687886         | -790.6845316                  |
| <b>13</b>                              | -1235.612200      | -1235.329512        | -1235.326158                  |

**Imaginary Frequencies for TSs in Figure 4 (B3LYP-D3BJ /def2-SVP level of theory)**

| <b>non-assisted pathway</b> |                           | <b>silanolate dimer-assisted pathway</b> |                           | <b><i>tert</i>-butoxide dimer-assisted pathway</b> |                           |
|-----------------------------|---------------------------|------------------------------------------|---------------------------|----------------------------------------------------|---------------------------|
| <b>TS-A1</b>                | $-47.69i \text{ cm}^{-1}$ | <b>TS-B1</b>                             | $-54.83i \text{ cm}^{-1}$ | <b>TS-D1</b>                                       | $-50.48i \text{ cm}^{-1}$ |
|                             |                           | <b>TS-B2</b>                             | $-17.49i \text{ cm}^{-1}$ | <b>TS-D2</b>                                       | $-15.47i \text{ cm}^{-1}$ |
|                             |                           | <b>TS-B3</b>                             | $-96.50i \text{ cm}^{-1}$ | <b>TS-D3</b>                                       | $-63.13i \text{ cm}^{-1}$ |

## Cartesian Coordinates for Each Substrate

### INT-1

|    |           |           |           |
|----|-----------|-----------|-----------|
| Cu | -0.214248 | -0.447563 | -1.252463 |
| N  | -1.915864 | -1.109500 | -0.531490 |
| N  | -1.284399 | 1.487048  | -0.763990 |
| C  | -0.713565 | 2.690690  | -0.736008 |
| C  | -2.255395 | 1.186994  | 0.113233  |
| C  | -2.709640 | 2.119915  | 1.055536  |
| C  | -1.105207 | 3.681686  | 0.166981  |
| C  | -2.124685 | 3.386528  | 1.075807  |
| H  | 0.093687  | 2.853006  | -1.456635 |
| H  | -0.615629 | 4.657189  | 1.160504  |
| H  | -2.449357 | 4.129357  | 1.807709  |
| C  | -2.292437 | -2.395432 | -0.619105 |
| C  | -2.751858 | -0.211677 | 0.045631  |
| C  | -3.996036 | -0.605435 | 0.552657  |
| C  | -3.514882 | -2.856193 | -0.137245 |
| C  | -4.383539 | -1.940806 | 0.461495  |
| H  | -1.575325 | -3.075442 | -1.084050 |
| H  | -3.772956 | -3.912277 | -0.229044 |
| H  | -5.353326 | -2.261620 | 0.847649  |
| H  | -4.662235 | 0.135013  | 0.995680  |
| H  | -3.477716 | 1.854331  | 1.782815  |
| O  | 1.512500  | -0.131763 | -1.782232 |
| Si | 2.762206  | 0.133918  | -0.761081 |
| C  | 4.353491  | -0.671989 | -1.401217 |
| C  | 3.119354  | 1.992906  | -0.555991 |
| Si | 2.241743  | -0.739085 | 1.370313  |
| C  | 3.705136  | -0.742254 | 2.583777  |
| C  | 1.605796  | -2.521628 | 1.176781  |
| C  | 0.829958  | 0.270717  | 2.158971  |
| H  | 4.608637  | -0.277417 | -2.399863 |
| H  | 4.228122  | -1.763124 | -1.496216 |
| H  | 5.207447  | -0.481878 | -0.728856 |
| H  | 3.305466  | 2.459942  | -1.538893 |
| H  | 4.003810  | 2.171929  | 0.079325  |
| H  | 2.263735  | 2.511951  | -0.092422 |
| H  | 4.540421  | -1.343770 | 2.188706  |
| H  | 4.081635  | 0.281107  | 2.748424  |
| H  | 2.398483  | -3.188315 | 0.799518  |
| H  | 1.121343  | 1.323937  | 2.304163  |
| H  | 0.783177  | -2.535870 | 0.442563  |
| H  | 3.420866  | -1.160047 | 3.564975  |
| H  | -0.056675 | 0.258093  | 1.506590  |
| H  | 1.230999  | -2.935635 | 2.128436  |
| H  | 0.536183  | -0.141648 | 3.139502  |

### TS-A1

|    |           |           |           |
|----|-----------|-----------|-----------|
| Cu | 0.329339  | 0.018272  | -0.650115 |
| O  | 1.543711  | 0.328604  | -2.242143 |
| N  | -1.218423 | 1.387506  | -0.293564 |
| Si | 2.605515  | 0.293126  | -1.028076 |
| C  | 3.881962  | -1.097964 | -1.091249 |
| C  | 3.465940  | 1.936984  | -0.670793 |
| Si | 1.618033  | -0.380955 | 1.386660  |
| C  | 0.183352  | 0.323277  | 2.496579  |
| C  | 1.704785  | -2.268794 | 1.627668  |
| C  | 3.151693  | 0.325314  | 2.280644  |
| H  | 0.773777  | -2.761643 | 1.305675  |
| H  | 2.535413  | -2.712218 | 1.056467  |
| H  | 1.859214  | -2.511775 | 2.693353  |
| H  | 4.104263  | 0.015854  | 1.824739  |
| H  | 3.129367  | 1.426422  | 2.298753  |
| H  | 3.147618  | -0.029557 | 3.326099  |
| H  | 0.051952  | 1.323437  | 2.418494  |
| H  | -0.775734 | -0.240540 | 2.235069  |
| H  | 0.403939  | -0.007077 | 3.552074  |

|   |           |           |           |
|---|-----------|-----------|-----------|
| H | 3.385895  | -2.060022 | -1.290416 |
| H | 4.571891  | -0.895556 | -1.929014 |
| H | 4.482181  | -1.191787 | -0.173151 |
| H | 3.934572  | 2.279899  | -1.609643 |
| H | 2.738356  | 2.705516  | -0.365440 |
| H | 4.247386  | 1.868950  | 0.100276  |
| N | -1.280662 | -1.246228 | -0.536032 |
| C | -1.223641 | -2.573981 | -0.696896 |
| C | -2.445179 | -0.665255 | -0.172285 |
| C | -3.594125 | -1.435981 | 0.057383  |
| C | -2.323438 | -3.402859 | -0.491027 |
| C | -3.532244 | -2.818376 | -0.100564 |
| H | -0.256089 | -2.978133 | -1.004434 |
| H | -2.231492 | -4.480682 | -0.634329 |
| H | -4.417754 | -3.432524 | 0.075860  |
| C | -1.088975 | 2.714830  | -0.223372 |
| C | -2.412444 | 0.813516  | -0.047972 |
| C | -3.529893 | 1.589884  | 0.293760  |
| C | -2.150561 | 3.553635  | 0.110562  |
| C | -3.394891 | 2.973756  | 0.376652  |
| H | -0.094830 | 3.111963  | -0.447131 |
| H | -2.003915 | 4.633911  | 0.158945  |
| H | -4.253143 | 3.594303  | 0.643036  |
| H | -4.494623 | 1.123219  | 0.491219  |
| H | -4.528881 | -0.962543 | 0.356417  |

### INT-A2

|    |           |           |           |
|----|-----------|-----------|-----------|
| Cu | 0.398149  | 0.001979  | -0.591814 |
| O  | 1.533573  | 0.158884  | -2.300751 |
| N  | -1.177329 | 1.380853  | -0.367027 |
| Si | 2.607207  | 0.208411  | -1.103747 |
| C  | 3.838279  | -1.214825 | -0.982564 |
| C  | 3.490064  | 1.854075  | -0.836776 |
| Si | 1.483366  | -0.295068 | 1.480940  |
| C  | 0.048090  | 0.333433  | 2.582619  |
| C  | 1.630638  | -2.162246 | 1.837316  |
| C  | 3.016025  | 0.513800  | 2.281872  |
| H  | 0.706604  | -2.695147 | 1.559953  |
| H  | 2.461979  | -2.619743 | 1.278343  |
| H  | 1.808026  | -2.338971 | 2.912603  |
| H  | 3.966671  | 0.180841  | 1.837940  |
| H  | 2.974924  | 1.611847  | 2.201088  |
| H  | 3.040096  | 0.255990  | 3.355121  |
| H  | -0.102769 | 1.418736  | 2.464134  |
| H  | -0.903280 | -0.164561 | 2.336521  |
| H  | 0.268786  | 0.136408  | 3.646801  |
| H  | 3.324213  | -2.176639 | -1.128488 |
| H  | 4.587402  | -1.104731 | -1.785943 |
| H  | 4.375310  | -1.241965 | -0.021899 |
| H  | 4.053697  | 2.091991  | -1.755782 |
| H  | 2.763881  | 2.665421  | -0.673957 |
| H  | 4.196929  | 1.839100  | 0.005560  |
| N  | -1.239277 | -1.257629 | -0.521456 |
| C  | -1.180297 | -2.586713 | -0.657487 |
| C  | -2.411502 | -0.665295 | -0.211350 |
| C  | -3.572658 | -1.426306 | -0.011782 |
| C  | -2.291430 | -3.407834 | -0.480207 |
| C  | -3.510867 | -2.811382 | -0.145504 |
| H  | -0.202068 | -2.998502 | -0.918246 |
| H  | -2.199963 | -4.488361 | -0.601741 |
| H  | -4.405599 | -3.418796 | 0.006305  |
| C  | -1.043006 | 2.708261  | -0.311844 |
| C  | -2.372241 | 0.815123  | -0.108034 |
| C  | -3.484151 | 1.599289  | 0.233755  |
| C  | -2.099868 | 3.555390  | 0.016075  |
| C  | -3.344252 | 2.983590  | 0.298005  |



|   |           |           |           |
|---|-----------|-----------|-----------|
| H | -0.047737 | 3.099579  | -0.540305 |
| H | -1.948915 | 4.635630  | 0.049641  |
| H | -4.197982 | 3.610348  | 0.564375  |
| H | -4.447408 | 1.137632  | 0.449312  |
| H | -4.516438 | -0.944081 | 0.241391  |

#### dimethylsilanone

|    |           |           |           |
|----|-----------|-----------|-----------|
| O  | 0.000000  | 1.736562  | 0.000000  |
| Si | 0.000000  | 0.198079  | 0.000000  |
| C  | 0.000000  | -0.850225 | -1.548496 |
| C  | 0.000000  | -0.850225 | 1.548496  |
| H  | 0.000000  | -0.218076 | -2.447734 |
| H  | 0.886571  | -1.506687 | -1.569900 |
| H  | -0.886571 | -1.506687 | -1.569900 |
| H  | 0.000000  | -0.218076 | 2.447734  |
| H  | -0.886571 | -1.506687 | 1.569900  |
| H  | 0.886571  | -1.506687 | 1.569900  |

#### INT-B2

|    |           |           |           |
|----|-----------|-----------|-----------|
| Cu | 0.829047  | -0.327490 | 0.300712  |
| N  | 2.438979  | -0.895148 | -0.901794 |
| N  | 2.388294  | 0.032410  | 1.591517  |
| C  | 2.286001  | 0.725500  | 2.735122  |
| C  | 3.610670  | -0.146587 | 1.036308  |
| C  | 4.768117  | 0.372988  | 1.632730  |
| C  | 3.389123  | 1.263545  | 3.390294  |
| C  | 4.657415  | 1.084094  | 2.824803  |
| H  | 1.273905  | 0.854117  | 3.126423  |
| H  | 3.255080  | 1.815466  | 4.322065  |
| H  | 5.545062  | 1.505257  | 3.301404  |
| C  | 2.329092  | -1.599219 | -2.036040 |
| C  | 3.613345  | -0.901994 | -0.232273 |
| C  | 4.724327  | -1.612285 | -0.709401 |
| C  | 3.387124  | -2.321897 | -2.578525 |
| C  | 4.611870  | -2.326262 | -1.899661 |
| H  | 1.347137  | -1.583706 | -2.515554 |
| H  | 3.253279  | -2.871293 | -3.511940 |
| H  | 5.461414  | -2.893204 | -2.286043 |
| H  | 5.653026  | -1.629171 | -0.137830 |
| H  | 5.738105  | 0.244614  | 1.150984  |
| C  | -5.873912 | 1.495630  | -0.306478 |
| Si | -5.026018 | -0.127067 | 0.183248  |
| C  | -6.180367 | -1.558616 | -0.276959 |
| C  | -4.880581 | -0.128134 | 2.097703  |
| O  | -3.534193 | -0.289201 | -0.429975 |
| Na | -1.650404 | -0.083771 | -1.367768 |
| Na | -2.051642 | -0.567835 | 1.177009  |
| O  | -0.556011 | -1.680487 | -0.257088 |
| O  | -0.639827 | 1.030719  | 0.545892  |
| Si | -0.568223 | -3.292535 | 0.044119  |
| C  | -1.162406 | -4.250033 | -1.470970 |
| C  | -1.774040 | -3.613046 | 1.481201  |
| C  | -1.141796 | -3.923942 | 0.555173  |
| Si | -0.530903 | 2.659807  | 0.339197  |
| C  | -2.266512 | 3.399141  | 0.182366  |
| C  | 0.360667  | 3.536252  | 1.765361  |
| Si | 0.687020  | 2.993855  | -1.652669 |
| C  | 0.406110  | 4.683260  | -2.467886 |
| C  | 0.148226  | 1.644911  | -2.898479 |
| C  | 2.542319  | 2.743560  | -1.343175 |
| H  | -5.985101 | 1.556381  | -1.402643 |
| H  | -5.272313 | 2.362129  | 0.014229  |
| H  | -7.176058 | -1.461595 | 0.188673  |
| H  | -5.850321 | -0.008375 | 2.608993  |
| H  | -4.234016 | 0.701254  | 2.441894  |
| H  | -6.321861 | -1.605572 | -1.370095 |
| H  | -2.162139 | -3.896622 | -1.774160 |
| H  | -2.841514 | 3.219724  | 1.107344  |
| H  | -5.747826 | -2.522798 | 0.040274  |

|   |           |           |           |
|---|-----------|-----------|-----------|
| H | -4.450826 | -1.081384 | 2.462124  |
| H | -2.826058 | 2.920570  | -0.637540 |
| H | -0.476323 | -4.090707 | -2.320394 |
| H | -2.242275 | 4.486326  | -0.001157 |
| H | -1.225171 | -5.335763 | -1.288204 |
| H | -2.788955 | -3.265680 | 1.217263  |
| H | -0.129494 | 3.313244  | 2.729242  |
| H | -1.854264 | -4.680085 | 1.746145  |
| H | 0.345574  | 4.630460  | 1.625305  |
| H | -1.448102 | -3.083072 | 2.395966  |
| H | 1.412976  | 3.219313  | 1.836365  |
| H | -0.661001 | 4.838804  | -2.698861 |
| H | 1.117572  | -4.986982 | 0.847942  |
| H | 1.864853  | -3.818564 | -0.269992 |
| H | 0.723717  | 5.498999  | -1.797548 |
| H | 1.526908  | -3.342905 | 1.409998  |
| H | -0.936494 | 1.690940  | -3.104372 |
| H | 2.936992  | 3.513471  | -0.660352 |
| H | 0.418382  | 0.650466  | -2.505221 |
| H | 0.974135  | 4.779812  | -3.408829 |
| H | 2.706899  | 1.760080  | -0.879212 |
| H | 0.661914  | 1.756447  | -3.867343 |
| H | 3.124854  | 2.784720  | -2.279009 |
| H | -6.878767 | 1.592641  | 0.138896  |

#### TS-B1

|    |           |           |           |
|----|-----------|-----------|-----------|
| Cu | 1.592016  | -0.175194 | 0.001289  |
| N  | 1.424349  | -1.990861 | -0.900684 |
| N  | 0.790675  | -1.255648 | 1.605016  |
| C  | 0.499665  | -0.805468 | 2.831208  |
| C  | 0.320645  | -2.449782 | 1.194488  |
| C  | -0.446037 | -3.247986 | 2.055435  |
| C  | -0.291917 | -1.522010 | 3.726219  |
| C  | -0.766274 | -2.774462 | 3.323751  |
| H  | 0.914696  | 0.171480  | 3.098741  |
| H  | -0.520517 | -1.112745 | 4.711368  |
| H  | -1.385820 | -3.375509 | 3.992336  |
| C  | 1.750967  | -2.275070 | -2.165970 |
| C  | 0.671198  | -2.856246 | -0.192925 |
| C  | 0.269081  | -4.077242 | -0.748067 |
| C  | 1.361174  | -3.453924 | -2.796782 |
| C  | 0.610267  | -4.375380 | -2.063277 |
| H  | 2.350373  | -1.526449 | -2.690471 |
| H  | 1.645787  | -3.642868 | -3.832978 |
| H  | 0.286068  | -5.315790 | -2.513761 |
| H  | -0.332675 | -4.776803 | -0.172831 |
| H  | -0.816513 | -4.217407 | 1.729666  |
| C  | -1.809685 | 4.494207  | -1.028306 |
| Si | -2.923214 | 3.233929  | -0.141040 |
| C  | -4.702027 | 3.882932  | -0.181782 |
| C  | -2.380862 | 3.237776  | 1.705056  |
| O  | -2.752207 | 1.735980  | -0.728435 |
| Na | -1.299794 | 0.568849  | -1.846130 |
| Na | -1.442314 | 0.644320  | 0.711608  |
| O  | -1.544427 | -1.236185 | -0.531860 |
| O  | 0.347024  | 1.379008  | -0.531313 |
| Si | -3.062291 | -1.820732 | -0.418825 |
| C  | -4.161928 | -1.161980 | -1.813130 |
| C  | -3.842539 | -1.258948 | 1.229804  |
| C  | -3.166762 | -3.723352 | -0.466636 |
| Si | 1.753952  | 2.188057  | -0.297790 |
| C  | 2.309978  | 3.095036  | -1.855204 |
| C  | 1.634760  | 3.384733  | 1.154679  |
| Si | 3.874027  | 0.834791  | 0.148942  |
| C  | 4.879466  | 2.336997  | 0.752948  |
| C  | 4.691656  | 0.245940  | -1.462574 |
| C  | 4.194104  | -0.494409 | 1.482506  |
| H  | -2.108922 | 4.597553  | -2.085546 |
| H  | -0.768845 | 4.131253  | -1.012591 |

|   |           |           |           |
|---|-----------|-----------|-----------|
| H | -4.787911 | 4.896224  | 0.246741  |
| H | -2.531091 | 4.212338  | 2.198865  |
| H | -1.306116 | 2.998820  | 1.811740  |
| H | -5.073496 | 3.920961  | -1.219786 |
| H | -4.185611 | -0.061666 | -1.731567 |
| H | 1.552035  | 3.859951  | -2.096202 |
| H | -5.372592 | 3.213606  | 0.383135  |
| H | -2.965123 | 2.493890  | 2.278725  |
| H | 2.368917  | 2.397386  | -2.705423 |
| H | -3.755861 | -1.439249 | -2.803091 |
| H | 3.282749  | 3.599210  | -1.750475 |
| H | -5.196729 | -1.540738 | -1.762840 |
| H | -3.989820 | -0.164517 | 1.207224  |
| H | 0.789118  | 4.066749  | 0.965891  |
| H | -4.828551 | -1.714269 | 1.421061  |
| H | 2.541593  | 3.990698  | 1.296321  |
| H | -3.189957 | -1.510505 | 2.085032  |
| H | 1.426069  | 2.847913  | 2.094189  |
| H | 4.812359  | 3.202616  | 0.076553  |
| H | -4.220723 | -4.049640 | -0.472709 |
| H | -2.689010 | -4.122424 | -1.376917 |
| H | 4.550676  | 2.661457  | 1.752484  |
| H | -2.685282 | -4.195146 | 0.405699  |
| H | 5.782330  | 0.149775  | -1.325645 |
| H | 3.724482  | -0.226311 | 2.442205  |
| H | 4.516661  | 0.954582  | -2.287453 |
| H | 5.941576  | 2.045668  | 0.824425  |
| H | 3.813272  | -1.483279 | 1.186927  |
| H | 4.307538  | -0.738840 | -1.771383 |
| H | 5.282165  | -0.578180 | 1.652239  |
| H | -1.835070 | 5.498307  | -0.571668 |

**INT-B3**

|    |           |           |           |
|----|-----------|-----------|-----------|
| Cu | 1.703042  | -0.072008 | 0.026717  |
| N  | 1.451134  | -1.857439 | -0.947274 |
| N  | 0.827919  | -1.193496 | 1.572480  |
| C  | 0.553583  | -0.781870 | 2.816064  |
| C  | 0.383001  | -2.390304 | 1.143098  |
| C  | -0.334227 | -3.234450 | 2.002599  |
| C  | -0.193157 | -1.544679 | 3.711306  |
| C  | -0.636234 | -2.802424 | 3.289843  |
| H  | 0.946049  | 0.200203  | 3.097675  |
| H  | -0.410269 | -1.166808 | 4.711424  |
| H  | -1.217531 | -3.439905 | 3.959070  |
| C  | 1.754207  | -2.087448 | -2.229367 |
| C  | 0.708369  | -2.747550 | -0.263478 |
| C  | 0.294003  | -3.945557 | -0.859048 |
| C  | 1.350149  | -3.238610 | -2.900468 |
| C  | 0.611954  | -4.189445 | -2.190406 |
| H  | 2.348102  | -1.318691 | -2.730662 |
| H  | 1.615495  | -3.386269 | -3.948429 |
| H  | 0.277886  | -5.110027 | -2.673546 |
| H  | -0.304181 | -4.663551 | -0.303243 |
| H  | -0.679424 | -4.207859 | 1.661422  |
| C  | -1.918887 | 4.422078  | -1.043526 |
| Si | -3.008844 | 3.156874  | -0.133144 |
| C  | -4.794016 | 3.789190  | -0.156713 |
| C  | -2.443205 | 3.181730  | 1.705712  |
| O  | -2.830982 | 1.656244  | -0.711306 |
| Na | -1.369943 | 0.508971  | -1.842227 |
| Na | -1.476613 | 0.593686  | 0.714006  |
| O  | -1.578697 | -1.291867 | -0.524658 |
| O  | 0.262834  | 1.378985  | -0.551780 |
| Si | -3.082790 | -1.897786 | -0.351702 |
| C  | -4.244811 | -1.268846 | -1.707305 |
| C  | -3.806142 | -1.333587 | 1.322439  |
| C  | -3.158898 | -3.802621 | -0.377676 |
| Si | 1.654963  | 2.195676  | -0.305137 |
| C  | 2.286440  | 3.074020  | -1.845961 |

|    |           |           |           |
|----|-----------|-----------|-----------|
| C  | 1.554965  | 3.386110  | 1.150229  |
| Si | 3.913441  | 0.757896  | 0.169142  |
| C  | 4.778431  | 2.313035  | 0.847322  |
| C  | 4.764225  | 0.334568  | -1.477851 |
| C  | 4.381864  | -0.608415 | 1.419676  |
| H  | -2.232644 | 4.515607  | -2.097483 |
| H  | -0.874497 | 4.068820  | -1.039046 |
| H  | -4.884156 | 4.804935  | 0.265086  |
| H  | -2.598210 | 4.158475  | 2.193723  |
| H  | -1.364601 | 2.955690  | 1.800021  |
| H  | -5.178692 | 3.815630  | -1.190261 |
| H  | -4.275886 | -0.167945 | -1.637765 |
| H  | 1.571569  | 3.875744  | -2.098817 |
| H  | -5.451171 | 3.118025  | 0.421617  |
| H  | -3.011119 | 2.435619  | 2.292600  |
| H  | 2.329627  | 2.376194  | -2.696313 |
| H  | -3.875840 | -1.553577 | -2.709430 |
| H  | 3.279235  | 3.530728  | -1.717166 |
| H  | -5.272327 | -1.658136 | -1.609833 |
| H  | -3.978188 | -0.242825 | 1.296003  |
| H  | 0.728381  | 4.089060  | 0.953271  |
| H  | -4.773411 | -1.807198 | 1.559298  |
| H  | 2.474811  | 3.968310  | 1.302579  |
| H  | -3.113590 | -1.562719 | 2.152234  |
| H  | 1.322062  | 2.850935  | 2.084254  |
| H  | 4.652884  | 3.201250  | 0.209846  |
| H  | -4.206713 | -4.145011 | -0.330782 |
| H  | -2.720304 | -4.203119 | -1.306992 |
| H  | 4.415441  | 2.565844  | 1.855835  |
| H  | -2.629353 | -4.259914 | 0.474494  |
| H  | 5.860551  | 0.320700  | -1.352040 |
| H  | 3.922310  | -0.426207 | 2.404348  |
| H  | 4.524415  | 1.068795  | -2.262813 |
| H  | 5.859837  | 2.105356  | 0.921457  |
| H  | 4.056923  | -1.602816 | 1.076963  |
| H  | 4.458144  | -0.660690 | -1.837776 |
| H  | 5.477648  | -0.629698 | 1.556334  |
| H  | -1.948429 | 5.428940  | -0.593181 |

**TS-B2**

|    |           |           |           |
|----|-----------|-----------|-----------|
| Cu | -1.711416 | -0.051672 | 0.009963  |
| N  | -1.453891 | 1.618788  | -1.147649 |
| N  | -1.116655 | 1.312775  | 1.492914  |
| C  | -0.927877 | 1.051757  | 2.791510  |
| C  | -0.686888 | 2.475168  | 0.969148  |
| C  | -0.084530 | 3.446261  | 1.782196  |
| C  | -0.292697 | 1.944551  | 3.651726  |
| C  | 0.127252  | 3.172475  | 3.128675  |
| H  | -1.301554 | 0.087350  | 3.149444  |
| H  | -0.144443 | 1.689504  | 4.702143  |
| H  | 0.622291  | 3.908024  | 3.765956  |
| C  | -1.630323 | 1.684883  | -2.471373 |
| C  | -0.895512 | 2.654488  | -0.492501 |
| C  | -0.554994 | 3.831677  | -1.170104 |
| C  | -1.278139 | 2.804819  | -3.220683 |
| C  | -0.740216 | 3.904069  | -2.546627 |
| H  | -2.075917 | 0.805646  | -2.943984 |
| H  | -1.433168 | 2.815200  | -4.300593 |
| H  | -0.459565 | 4.808599  | -3.090268 |
| H  | -0.118519 | 4.672340  | -0.636074 |
| H  | 0.252537  | 4.390314  | 1.360361  |
| C  | 2.440539  | -3.753168 | -1.693246 |
| Si | 3.311383  | -3.012981 | -0.161292 |
| C  | 5.152646  | -3.443897 | -0.289295 |
| C  | 2.608756  | -3.926877 | 1.356169  |
| O  | 3.022666  | -1.420229 | -0.074879 |
| Na | 1.500222  | -0.550706 | -1.428359 |
| Na | 1.516370  | -0.405031 | 1.126989  |
| O  | 1.495003  | 1.371106  | -0.289533 |

|    |           |           |           |
|----|-----------|-----------|-----------|
| O  | -0.101986 | -1.452046 | -0.104911 |
| Si | 2.930302  | 2.140405  | -0.187257 |
| C  | 4.167471  | 1.458618  | -1.448930 |
| C  | 3.674119  | 1.875418  | 1.547691  |
| C  | 2.826825  | 4.023319  | -0.469870 |
| Si | -1.471234 | -2.323237 | 0.076066  |
| C  | -1.818548 | -3.489158 | -1.359541 |
| C  | -1.546748 | -3.238411 | 1.720546  |
| Si | -3.867131 | -1.004991 | -0.047274 |
| C  | -4.734702 | -2.482226 | 0.783986  |
| C  | -4.472651 | -0.962822 | -1.849461 |
| C  | -4.608626 | 0.518976  | 0.834394  |
| H  | 2.814878  | -3.278097 | -2.618736 |
| H  | 1.353790  | -3.568294 | -1.629509 |
| H  | 5.324414  | -4.532163 | -0.353316 |
| H  | 2.757171  | -5.019386 | 1.315844  |
| H  | 1.524816  | -3.735233 | 1.432978  |
| H  | 5.599219  | -2.975357 | -1.182667 |
| H  | 4.305945  | 0.385047  | -1.235117 |
| H  | -1.049981 | -4.280663 | -1.358191 |
| H  | 5.700523  | -3.064039 | 0.589673  |
| H  | 3.082616  | -3.559451 | 2.283566  |
| H  | -1.746396 | -2.949774 | -2.316453 |
| H  | 3.785081  | 1.572192  | -2.479979 |
| H  | -2.806018 | -3.971375 | -1.303178 |
| H  | 5.150109  | 1.957686  | -1.404510 |
| H  | 3.940138  | 0.810024  | 1.667427  |
| H  | -0.672787 | -3.908995 | 1.778820  |
| H  | 4.592024  | 2.461158  | 1.722521  |
| H  | -2.454671 | -3.846262 | 1.840169  |
| H  | 2.949000  | 2.151494  | 2.334563  |
| H  | -1.485263 | -2.535662 | 2.566739  |
| H  | -4.460299 | -3.456070 | 0.350984  |
| H  | 3.837286  | 4.465900  | -0.448066 |
| H  | 2.385535  | 4.253569  | -1.453854 |
| H  | -4.519116 | -2.518326 | 1.863361  |
| H  | 2.230406  | 4.538646  | 0.301086  |
| H  | -5.574104 | -1.022421 | -1.884581 |
| H  | -4.300812 | 0.560710  | 1.891431  |
| H  | -4.071009 | -1.802367 | -2.437992 |
| H  | -5.824748 | -2.358721 | 0.663146  |
| H  | -4.291992 | 1.458658  | 0.356139  |
| H  | -4.175741 | -0.025757 | -2.346957 |
| H  | -5.711561 | 0.469003  | 0.803662  |
| H  | 2.589390  | -4.840898 | -1.801977 |

**INT-B4**

|    |           |           |           |
|----|-----------|-----------|-----------|
| Cu | 1.733316  | 1.393021  | 0.619522  |
| N  | 2.450021  | -0.820381 | -0.329547 |
| N  | 1.542159  | 0.053191  | 2.170291  |
| C  | 0.771929  | 0.438133  | 3.202330  |
| C  | 1.658567  | -1.267237 | 1.900272  |
| C  | 0.988872  | -2.237285 | 2.663932  |
| C  | 0.063754  | -0.460402 | 3.995584  |
| C  | 0.172073  | -1.831602 | 3.718592  |
| H  | 0.706568  | 1.514170  | 3.376572  |
| H  | -0.557922 | -0.093106 | 4.814020  |
| H  | -0.374996 | -2.568388 | 4.310775  |
| C  | 3.261457  | -1.071452 | -1.365531 |
| C  | 2.510171  | -1.631309 | 0.746152  |
| C  | 3.372713  | -2.736089 | 0.795034  |
| C  | 4.146637  | -2.147177 | -1.400410 |
| C  | 4.198439  | -3.001220 | -0.295470 |
| H  | 3.197419  | -0.376721 | -2.208116 |
| H  | 4.776081  | -2.310236 | -2.276704 |
| H  | 4.881246  | -3.853222 | -0.278800 |
| H  | 3.412477  | -3.359475 | 1.689497  |
| H  | 1.081838  | -3.291493 | 2.400699  |
| C  | -3.431811 | 0.258792  | -2.171307 |

|    |           |           |           |
|----|-----------|-----------|-----------|
| Si | -4.184362 | 0.581349  | -0.481660 |
| C  | -4.837500 | -1.040874 | 0.218135  |
| C  | -5.536014 | 1.882545  | -0.547724 |
| O  | -2.988340 | 1.077640  | 0.594456  |
| Na | 0.269850  | 0.059785  | -1.345301 |
| Na | -1.477144 | -0.748611 | 0.934565  |
| O  | -0.911598 | -1.688980 | -0.907644 |
| O  | -0.379714 | 1.163514  | 0.474852  |
| Si | -1.053779 | -3.280856 | -1.216546 |
| C  | -2.328739 | -3.630053 | -2.573157 |
| C  | -1.638411 | -4.189378 | 0.356796  |
| C  | 0.602243  | -4.046664 | -1.734526 |
| Si | -1.654692 | 2.157646  | 0.601282  |
| C  | -1.832651 | 3.378589  | -0.814636 |
| C  | -1.735994 | 3.058784  | 2.246648  |
| Si | 2.538593  | 2.755252  | -1.028579 |
| C  | 2.195551  | 4.637763  | -0.937314 |
| C  | 1.599034  | 2.237062  | -2.659786 |
| C  | 4.380506  | 2.636825  | -1.549828 |
| H  | -2.609096 | -0.468728 | -2.057949 |
| H  | -3.041592 | 1.179130  | -2.633343 |
| H  | -5.689236 | -1.415549 | -0.372561 |
| H  | -6.362645 | 1.566753  | -1.205317 |
| H  | -5.140986 | 2.834633  | -0.937465 |
| H  | -4.060017 | -1.823516 | 0.186652  |
| H  | -3.319081 | -3.240494 | -2.282710 |
| H  | -2.765368 | 3.961439  | -0.744941 |
| H  | -5.174217 | -0.922560 | 1.261076  |
| H  | -5.949546 | 2.072221  | 0.455993  |
| H  | -1.816676 | 2.874127  | -1.793034 |
| H  | -2.042154 | -3.129845 | -3.513675 |
| H  | -0.987418 | 4.084747  | -0.796687 |
| H  | -2.436206 | -4.707827 | -2.782264 |
| H  | -2.622374 | -3.809897 | 0.687196  |
| H  | -2.621557 | 3.710984  | 2.316431  |
| H  | -1.744739 | -5.276968 | 0.207648  |
| H  | -0.837753 | 3.683569  | 2.383135  |
| H  | -0.925290 | -4.037264 | 1.185830  |
| H  | -1.781412 | 2.338405  | 3.079613  |
| H  | 1.128824  | 4.844236  | -0.748334 |
| H  | 0.522177  | -5.127179 | -1.941492 |
| H  | 0.984273  | -3.558303 | -2.647437 |
| H  | 2.764730  | 5.094696  | -0.110198 |
| H  | 1.359813  | -3.905777 | -0.946258 |
| H  | 1.889341  | 2.867920  | -3.518360 |
| H  | 5.028818  | 3.050749  | -0.758872 |
| H  | 0.505191  | 2.349106  | -2.545969 |
| H  | 2.480759  | 5.156847  | -1.870190 |
| H  | 4.696674  | 1.591190  | -1.705808 |
| H  | 1.815633  | 1.195809  | -2.971085 |
| H  | 4.587123  | 3.195893  | -2.480570 |
| H  | -4.178259 | -0.171662 | -2.859197 |

**TS-B3**

|    |           |           |           |
|----|-----------|-----------|-----------|
| Cu | 2.400273  | -0.489744 | 0.102322  |
| N  | 1.867180  | -1.993890 | -1.342060 |
| N  | 1.398543  | -2.000798 | 1.300950  |
| C  | 1.241940  | -1.973650 | 2.625237  |
| C  | 0.468107  | -2.590365 | 0.525696  |
| C  | -0.668936 | -3.188001 | 1.086256  |
| C  | 0.126174  | -2.524741 | 3.261440  |
| C  | -0.843815 | -3.145167 | 2.469226  |
| H  | 2.031053  | -1.475073 | 3.195941  |
| H  | 0.026317  | -2.468864 | 4.346837  |
| H  | -1.734594 | -3.587378 | 2.920451  |
| C  | 2.108971  | -1.823605 | -2.642534 |
| C  | 0.678571  | -2.489196 | -0.944283 |
| C  | -0.331213 | -2.796876 | -1.864179 |
| C  | 1.167046  | -2.127458 | -3.628509 |

|               |           |           |           |    |           |           |           |
|---------------|-----------|-----------|-----------|----|-----------|-----------|-----------|
| C             | -0.078961 | -2.610681 | -3.223777 | H  | 0.706568  | 1.514170  | 3.376572  |
| H             | 3.086036  | -1.407071 | -2.903756 | H  | -0.557922 | -0.093106 | 4.814020  |
| H             | 1.403639  | -1.969826 | -4.682326 | H  | -0.374996 | -2.568388 | 4.310775  |
| H             | -0.857893 | -2.828697 | -3.958071 | C  | 3.261457  | -1.071452 | -1.365531 |
| H             | -1.320653 | -3.089308 | -1.520530 | C  | 2.510171  | -1.631309 | 0.746152  |
| H             | -1.420574 | -3.652761 | 0.453982  | C  | 3.372713  | -2.736089 | 0.795034  |
| C             | -3.022449 | 3.190004  | -1.952738 | C  | 4.146637  | -2.147177 | -1.400410 |
| Si            | -2.485075 | 3.345801  | -0.124153 | C  | 4.198439  | -3.001220 | -0.295470 |
| C             | -4.053554 | 3.246033  | 0.936101  | H  | 3.197419  | -0.376721 | -2.208116 |
| C             | -1.729388 | 5.069370  | 0.103178  | H  | 4.776081  | -2.310236 | -2.276704 |
| O             | -1.438411 | 2.145365  | 0.212811  | H  | 4.881246  | -3.853222 | -0.278800 |
| Na            | -1.397698 | 0.562168  | -1.453951 | H  | 3.412477  | -3.359475 | 1.689497  |
| Na            | -1.441723 | 0.136037  | 1.126770  | H  | 1.081838  | -3.291493 | 2.400699  |
| O             | -2.506159 | -1.021706 | -0.461884 | C  | -3.431811 | 0.258792  | -2.171307 |
| O             | 0.423177  | 0.234083  | -0.211708 | Si | -4.184362 | 0.581349  | -0.481660 |
| Si            | -4.002693 | -1.390662 | 0.048081  | C  | -4.837500 | -1.040874 | 0.218135  |
| C             | -5.354542 | -0.486086 | -0.922937 | C  | -5.536014 | 1.882545  | -0.547724 |
| C             | -4.173928 | -0.882551 | 1.886601  | O  | -2.988340 | 1.077640  | 0.594456  |
| C             | -4.373583 | -3.253242 | -0.039116 | Na | 0.269850  | 0.059785  | -1.345301 |
| Si            | 1.251965  | 1.546252  | 0.243571  | Na | -1.477144 | -0.748611 | 0.934565  |
| C             | 1.590183  | 2.890916  | -1.010823 | O  | -0.911598 | -1.688980 | -0.907644 |
| C             | 1.126022  | 2.132550  | 2.020403  | O  | -0.379714 | 1.163514  | 0.474852  |
| Si            | 4.314365  | 0.755440  | 0.216607  | Si | -1.053779 | -3.280856 | -1.216546 |
| C             | 4.616339  | 2.297310  | 1.297648  | C  | -2.328739 | -3.630053 | -2.573157 |
| C             | 4.913722  | 1.207938  | -1.538555 | C  | -1.638411 | -4.189378 | 0.356796  |
| C             | 5.565022  | -0.531884 | 0.879835  | C  | 0.602243  | -4.046664 | -1.734526 |
| H             | -3.550165 | 2.233828  | -2.128004 | Si | -1.654692 | 2.157646  | 0.601282  |
| H             | -2.141465 | 3.229632  | -2.620374 | C  | -1.832651 | 3.378589  | -0.814636 |
| H             | -4.771928 | 4.051126  | 0.707035  | C  | -1.735994 | 3.058784  | 2.246648  |
| H             | -2.456635 | 5.870611  | -0.111039 | Si | 2.538593  | 2.755252  | -1.028579 |
| H             | -0.862270 | 5.219035  | -0.562111 | C  | 2.195551  | 4.637763  | -0.937314 |
| H             | -4.566230 | 2.282688  | 0.777223  | C  | 1.599034  | 2.237062  | -2.659786 |
| H             | -5.206191 | 0.605201  | -0.863365 | C  | 4.380506  | 2.636825  | -1.549828 |
| H             | 0.734422  | 3.582598  | -1.010859 | H  | -2.609096 | -0.468728 | -2.057949 |
| H             | -3.800678 | 3.316492  | 2.008042  | H  | -3.041592 | 1.179130  | -2.633343 |
| H             | -1.377065 | 5.203625  | 1.140103  | H  | -5.689236 | -1.415549 | -0.372561 |
| H             | 1.697079  | 2.452632  | -2.014779 | H  | -6.362645 | 1.566753  | -1.205317 |
| H             | -5.318183 | -0.768594 | -1.989111 | H  | -5.140986 | 2.834633  | -0.937465 |
| H             | 2.503665  | 3.458198  | -0.780362 | H  | -4.060017 | -1.823516 | 0.186652  |
| H             | -6.368469 | -0.709627 | -0.550556 | H  | -3.319081 | -3.240494 | -2.282710 |
| H             | -4.052572 | 0.209100  | 2.009829  | H  | -2.765368 | 3.961439  | -0.744941 |
| H             | 0.240539  | 2.781351  | 2.095945  | H  | -5.174217 | -0.922560 | 1.261076  |
| H             | -5.155921 | -1.141391 | 2.316091  | H  | -5.949546 | 2.072221  | 0.455993  |
| H             | 2.020144  | 2.686704  | 2.337697  | H  | -1.816676 | 2.874127  | -1.793034 |
| H             | -3.411339 | -1.388845 | 2.507994  | H  | -2.042154 | -3.129845 | -3.513675 |
| H             | 1.001579  | 1.272600  | 2.698593  | H  | -0.987418 | 4.084747  | -0.796687 |
| H             | 4.026399  | 3.172518  | 0.982831  | H  | -2.436206 | -4.707827 | -2.782264 |
| H             | -5.415018 | -3.480309 | 0.244923  | H  | -2.622374 | -3.809897 | 0.687196  |
| H             | -4.217838 | -3.634477 | -1.063058 | H  | -2.621557 | 3.710984  | 2.316431  |
| H             | 4.376510  | 2.094880  | 2.354373  | H  | -1.744739 | -5.276968 | 0.207648  |
| H             | -3.717359 | -3.830062 | 0.635367  | H  | -0.837753 | 3.683569  | 2.383135  |
| H             | 5.945709  | 1.599986  | -1.514448 | H  | -0.925290 | -4.037264 | 1.185830  |
| H             | 5.328277  | -0.821071 | 1.917157  | H  | -1.781412 | 2.338405  | 3.079613  |
| H             | 4.273646  | 1.971397  | -2.008244 | H  | 1.128824  | 4.844236  | -0.748334 |
| H             | 5.681831  | 2.581128  | 1.246141  | H  | 0.522177  | -5.127179 | -1.941492 |
| H             | 5.557991  | -1.449853 | 0.269941  | H  | 0.984273  | -3.558303 | -2.647437 |
| H             | 4.910417  | 0.321450  | -2.195093 | H  | 2.764730  | 5.094696  | -0.110198 |
| H             | 6.590926  | -0.121764 | 0.868968  | H  | 1.359813  | -3.905777 | -0.946258 |
| H             | -3.706576 | 3.992067  | -2.276238 | H  | 1.889341  | 2.867920  | -3.518360 |
|               |           |           |           | H  | 5.028818  | 3.050749  | -0.758872 |
|               |           |           |           | H  | 0.505191  | 2.349106  | -2.545969 |
|               |           |           |           | H  | 2.480759  | 5.156847  | -1.870190 |
|               |           |           |           | H  | 4.696674  | 1.591190  | -1.705808 |
|               |           |           |           | H  | 1.815633  | 1.195809  | -2.971085 |
|               |           |           |           | H  | 4.587123  | 3.195893  | -2.480570 |
|               |           |           |           | H  | -4.178259 | -0.171662 | -2.859197 |
|               |           |           |           |    |           |           |           |
|               |           |           |           | 9  |           |           |           |
|               |           |           |           | Na | -0.130027 | -1.413614 | 0.000000  |
| <b>INT-B5</b> |           |           |           |    |           |           |           |
| Cu            | 1.733316  | 1.393021  | 0.619522  |    |           |           |           |
| N             | 2.450021  | -0.820381 | -0.329547 |    |           |           |           |
| N             | 1.542159  | 0.053191  | 2.170291  |    |           |           |           |
| C             | 0.771929  | 0.438133  | 3.202330  |    |           |           |           |
| C             | 1.658567  | -1.267237 | 1.900272  |    |           |           |           |
| C             | 0.988872  | -2.237285 | 2.663932  |    |           |           |           |
| C             | 0.063754  | -0.460402 | 3.995584  |    |           |           |           |
| C             | 0.172073  | -1.831602 | 3.718592  |    |           |           |           |

|    |           |           |           |
|----|-----------|-----------|-----------|
| O  | -1.585623 | 0.166441  | -0.000001 |
| Si | -3.212592 | 0.027496  | 0.000000  |
| C  | -3.689829 | -1.816383 | 0.000005  |
| C  | -3.992825 | 0.822552  | 1.533324  |
| C  | -3.992827 | 0.822543  | -1.533328 |
| H  | -3.587228 | 0.375184  | 2.456535  |
| H  | -3.776839 | 1.904443  | 1.566426  |
| H  | -5.089245 | 0.701448  | 1.551960  |
| H  | -3.287873 | -2.326865 | -0.894068 |
| H  | -3.287872 | -2.326860 | 0.894082  |
| H  | -4.781451 | -1.974441 | 0.000006  |
| H  | -3.776841 | 1.904434  | -1.566437 |
| H  | -3.587231 | 0.375170  | -2.456537 |
| H  | -5.089247 | 0.701439  | -1.551961 |
| Na | 0.130026  | 1.413616  | 0.000000  |
| O  | 1.585622  | -0.166438 | 0.000002  |
| Si | 3.212592  | -0.027496 | 0.000000  |
| C  | 3.689832  | 1.816382  | -0.000007 |
| C  | 3.992826  | -0.822544 | 1.533328  |
| C  | 3.992823  | -0.822555 | -1.533323 |
| H  | 3.776835  | -1.904445 | -1.566425 |
| H  | 3.587226  | -0.375187 | -2.456535 |
| H  | 5.089243  | -0.701453 | -1.551960 |
| H  | 3.587231  | -0.375169 | 2.456537  |
| H  | 3.776838  | -1.904434 | 1.566438  |
| H  | 5.089247  | -0.701442 | 1.551961  |
| H  | 3.287876  | 2.326859  | -0.894083 |
| H  | 3.287878  | 2.326865  | 0.894067  |
| H  | 4.781455  | 1.974438  | -0.000009 |

### 10

|    |           |           |           |
|----|-----------|-----------|-----------|
| O  | -1.035450 | -2.176850 | -0.121774 |
| Si | -2.374945 | -1.279850 | -0.094420 |
| C  | -3.162010 | -1.085767 | 1.609212  |
| C  | -3.690820 | -1.784335 | -1.337463 |
| H  | -3.513526 | -2.067288 | 1.968285  |
| H  | -2.444194 | -0.699203 | 2.350739  |
| H  | -4.030670 | -0.407708 | 1.590225  |
| H  | -3.268431 | -1.816445 | -2.355499 |
| H  | -4.084618 | -2.788336 | -1.109202 |
| H  | -4.536157 | -1.076709 | -1.344059 |
| Na | 0.147652  | -0.698492 | -1.388611 |
| O  | 1.915460  | -0.827986 | -0.183912 |
| Si | 3.313333  | 0.000077  | -0.016323 |
| C  | 3.144919  | 1.761784  | -0.705861 |
| C  | 3.781668  | 0.143312  | 1.819404  |
| C  | 4.750409  | -0.841065 | -0.920302 |
| H  | 2.984257  | 0.654746  | 2.385385  |
| H  | 3.923972  | -0.856696 | 2.267023  |
| H  | 4.716911  | 0.707254  | 1.974534  |
| H  | 2.874129  | 1.741703  | -1.776376 |
| H  | 2.357836  | 2.319536  | -0.171809 |
| H  | 4.082480  | 2.335853  | -0.615448 |
| H  | 4.912138  | -1.862443 | -0.535446 |
| H  | 4.538827  | -0.925112 | -1.999905 |
| H  | 5.695939  | -0.284387 | -0.804958 |
| Na | 0.795561  | -2.249810 | 0.944220  |
| O  | -1.859314 | 0.282139  | -0.629911 |
| Si | -1.536800 | 1.772236  | 0.072714  |
| C  | -0.334874 | 1.518101  | 1.500080  |
| C  | -0.716730 | 2.802560  | -1.271213 |
| C  | -3.126979 | 2.587440  | 0.648670  |
| H  | -3.842961 | 2.678322  | -0.184201 |
| H  | -3.607338 | 2.001607  | 1.447909  |
| H  | -2.931303 | 3.598703  | 1.042145  |
| H  | 0.239993  | 2.359305  | -1.595057 |
| H  | -1.372369 | 2.890875  | -2.152749 |
| H  | -0.490567 | 3.819961  | -0.912285 |
| H  | -0.810987 | 0.975589  | 2.332540  |

|   |          |          |          |
|---|----------|----------|----------|
| H | 0.531792 | 0.929270 | 1.155136 |
| H | 0.038212 | 2.477864 | 1.893391 |

### CuSiMe<sub>3</sub>(bpy)

|    |           |           |           |
|----|-----------|-----------|-----------|
| Cu | 0.713476  | -0.383321 | -0.145611 |
| N  | -1.162236 | -1.297460 | -0.061962 |
| N  | -0.673539 | 1.290281  | -0.346305 |
| C  | -0.295042 | 2.568922  | -0.374195 |
| C  | -1.937407 | 0.971976  | -0.015042 |
| C  | -2.877246 | 1.959687  | 0.311471  |
| C  | -1.172491 | 3.614755  | -0.080323 |
| C  | -2.486458 | 3.298277  | 0.273053  |
| H  | 0.751346  | 2.753132  | -0.635135 |
| H  | -0.828617 | 4.649725  | -0.122236 |
| H  | -3.200122 | 4.085766  | 0.525145  |
| C  | -1.332877 | -2.622734 | -0.065080 |
| C  | -2.237145 | -0.484749 | -0.004217 |
| C  | -3.536374 | -1.005633 | 0.062762  |
| C  | -2.593288 | -3.217991 | -0.007538 |
| C  | -3.714622 | -2.388500 | 0.060952  |
| H  | -0.419309 | -3.221748 | -0.108653 |
| H  | -2.687846 | -4.305093 | -0.013709 |
| H  | -4.719859 | -2.813081 | 0.107120  |
| H  | -4.399261 | -0.340540 | 0.098380  |
| H  | -3.892210 | 1.692203  | 0.606642  |
| Si | 2.975035  | -0.247742 | 0.085369  |
| C  | 3.667983  | -0.750086 | 1.801844  |
| C  | 4.009344  | -1.271873 | -1.164383 |
| C  | 3.605780  | 1.555138  | -0.157823 |
| H  | 3.217822  | -0.145248 | 2.607562  |
| H  | 3.449045  | -1.808085 | 2.025795  |
| H  | 4.763910  | -0.614526 | 1.850807  |
| H  | 3.803600  | -2.351047 | -1.061767 |
| H  | 3.773514  | -0.990917 | -2.205011 |
| H  | 5.093325  | -1.119144 | -1.011084 |
| H  | 3.350224  | 1.933838  | -1.163255 |
| H  | 3.149768  | 2.238546  | 0.580113  |
| H  | 4.702855  | 1.628025  | -0.044172 |

### NaOfBu

|    |           |           |           |
|----|-----------|-----------|-----------|
| Na | 2.703067  | 0.000029  | -0.000024 |
| O  | 0.757800  | 0.000099  | -0.000058 |
| C  | -0.617007 | -0.000018 | 0.000006  |
| C  | -1.149324 | 0.977654  | 1.072728  |
| C  | -1.149430 | 0.440113  | -1.383041 |
| C  | -1.149169 | -1.417876 | 0.310377  |
| H  | -0.775410 | 1.993512  | 0.864072  |
| H  | -0.774895 | 0.676292  | 2.064845  |
| H  | -2.251953 | 1.013611  | 1.112651  |
| H  | -0.775180 | 1.450075  | -1.618027 |
| H  | -2.252059 | 0.456500  | -1.434076 |
| H  | -0.775397 | -0.248417 | -2.158504 |
| H  | -0.774711 | -2.126342 | -0.446699 |
| H  | -0.775166 | -1.745068 | 1.294442  |
| H  | -2.251789 | -1.470506 | 0.321605  |

### NaOSi<sub>2</sub>Me<sub>5</sub>

|    |           |           |           |
|----|-----------|-----------|-----------|
| Na | -1.343311 | -2.690416 | 0.000038  |
| O  | -1.933022 | -0.766426 | 0.000398  |
| Si | -1.078783 | 0.611342  | 0.000044  |
| C  | -1.393761 | 1.703203  | -1.522972 |
| C  | -1.393532 | 1.703874  | 1.522619  |
| Si | 1.244146  | 0.053329  | -0.000010 |
| C  | 2.189005  | 0.645581  | 1.539875  |
| C  | 2.189256  | 0.646569  | -1.539359 |
| C  | 1.415926  | -1.869126 | -0.000587 |
| H  | -2.454584 | 2.005912  | -1.562321 |
| H  | -1.166548 | 1.163156  | -2.457198 |
| H  | -0.778928 | 2.619610  | -1.503327 |

|   |           |           |           |
|---|-----------|-----------|-----------|
| H | -2.454345 | 2.006615  | 1.561986  |
| H | -0.778691 | 2.620266  | 1.502476  |
| H | -1.166188 | 1.164233  | 2.457046  |
| H | 2.186151  | 1.746796  | 1.593386  |
| H | 1.714327  | 0.273904  | 2.463144  |
| H | 2.186416  | 1.747819  | -1.592159 |
| H | 0.964243  | -2.311245 | 0.908606  |
| H | 1.714728  | 0.275490  | -2.462945 |
| H | 3.239998  | 0.309184  | 1.534602  |
| H | 0.963899  | -2.310764 | -0.909840 |
| H | 3.240248  | 0.310166  | -1.534129 |
| H | 2.473417  | -2.181151 | -0.000854 |

**CuOzBu(bpy)**

|    |           |           |           |
|----|-----------|-----------|-----------|
| Cu | 0.655733  | -0.331138 | -0.164828 |
| N  | -1.046553 | -1.284948 | -0.000360 |
| N  | -0.779584 | 1.339368  | -0.326120 |
| C  | -0.475656 | 2.635107  | -0.320927 |
| C  | -2.017033 | 0.924321  | -0.020889 |
| C  | -3.034343 | 1.840136  | 0.287547  |
| C  | -1.430219 | 3.614187  | -0.035748 |
| C  | -2.731215 | 3.202089  | 0.270190  |
| H  | 0.570154  | 2.871498  | -0.544170 |
| H  | -1.159472 | 4.671584  | -0.048179 |
| H  | -3.503504 | 3.936899  | 0.508747  |
| C  | -1.131223 | -2.626264 | 0.022030  |
| C  | -2.190549 | -0.551578 | -0.006662 |
| C  | -3.446031 | -1.172034 | 0.008495  |
| C  | -2.345354 | -3.306507 | 0.038150  |
| C  | -3.528451 | -2.562432 | 0.030800  |
| H  | -0.181439 | -3.164994 | 0.032670  |
| H  | -2.357467 | -4.397428 | 0.057232  |
| H  | -4.501331 | -3.058227 | 0.037203  |
| H  | -4.352910 | -0.567700 | -0.014369 |
| H  | -4.035798 | 1.503243  | 0.557521  |
| O  | 2.286231  | 0.480499  | -0.256980 |
| C  | 3.505211  | -0.082014 | 0.096100  |
| C  | 4.592694  | 0.991734  | -0.102021 |
| C  | 3.485801  | -0.526226 | 1.573021  |
| C  | 3.817071  | -1.299764 | -0.797175 |
| H  | 4.363042  | 1.866545  | 0.526758  |
| H  | 4.592769  | 1.323866  | -1.152136 |
| H  | 5.601450  | 0.626780  | 0.154299  |
| H  | 3.213072  | 0.330632  | 2.209435  |
| H  | 4.455538  | -0.927766 | 1.914452  |
| H  | 2.716858  | -1.305612 | 1.711423  |
| H  | 3.034073  | -2.064652 | -0.656525 |
| H  | 3.800735  | -0.994225 | -1.855360 |
| H  | 4.796869  | -1.756908 | -0.575253 |

**II**

|    |           |           |           |
|----|-----------|-----------|-----------|
| Si | 1.312604  | 0.280043  | 0.015008  |
| O  | -0.311565 | -0.412319 | -0.101804 |
| C  | -1.629229 | 0.122959  | -0.022046 |
| C  | -1.733320 | 1.458528  | -0.768266 |
| C  | -2.551659 | -0.908476 | -0.684880 |
| C  | -2.016728 | 0.301666  | 1.452322  |
| H  | -1.418055 | 1.340241  | -1.815294 |
| H  | -1.093995 | 2.221731  | -0.301527 |
| H  | -2.769085 | 1.831830  | -0.755086 |
| H  | -2.250944 | -1.066417 | -1.732419 |
| H  | -3.603698 | -0.584153 | -0.669357 |
| H  | -2.492343 | -1.874244 | -0.153400 |
| H  | -1.916982 | -0.655076 | 1.989825  |
| H  | -1.360930 | 1.034764  | 1.941593  |
| H  | -3.057857 | 0.647137  | 1.553768  |
| C  | 1.347650  | 1.447671  | 1.498498  |
| O  | 2.191677  | -1.046849 | 0.143231  |
| C  | 1.603488  | 1.288161  | -1.554525 |

|    |          |           |           |
|----|----------|-----------|-----------|
| H  | 1.369271 | 0.687958  | -2.449152 |
| H  | 1.014357 | 2.217609  | -1.599977 |
| H  | 2.670352 | 1.561707  | -1.611626 |
| H  | 0.657989 | 2.302348  | 1.400983  |
| H  | 1.108854 | 0.911354  | 2.430884  |
| H  | 2.366839 | 1.855845  | 1.604950  |
| Na | 0.657969 | -2.449359 | 0.008881  |

**INT-E2**

|    |            |            |           |
|----|------------|------------|-----------|
| Cu | 0.7112470  | -0.6014910 | 0.426446  |
| N  | 2.2290800  | -0.9459280 | -0.972112 |
| N  | 2.3768730  | -0.1672300 | 1.564725  |
| C  | 2.3400900  | 0.4248890  | 2.766707  |
| C  | 3.5407690  | -0.1872440 | 0.875280  |
| C  | 4.7066660  | 0.3970840  | 1.391678  |
| C  | 3.4568750  | 1.0128880  | 3.351530  |
| C  | 4.6660500  | 1.0004840  | 2.645862  |
| H  | 1.3683260  | 0.4305220  | 3.266716  |
| H  | 3.3779720  | 1.4781520  | 4.335437  |
| H  | 5.5604870  | 1.4675260  | 3.063312  |
| C  | 2.0779170  | -1.5326290 | -2.167573 |
| C  | 3.4720970  | -0.8398130 | -0.446928 |
| C  | 4.5973490  | -1.3325430 | -1.124411 |
| C  | 3.1446580  | -2.0338700 | -2.906205 |
| C  | 4.4339140  | -1.9337430 | -2.369121 |
| H  | 1.0543680  | -1.5977380 | -2.544747 |
| H  | 2.9678650  | -2.4927440 | -3.880437 |
| H  | 5.2964550  | -2.3283220 | -2.910167 |
| H  | 5.5856500  | -1.2649790 | -0.668617 |
| H  | 5.6261070  | 0.4015770  | 0.805395  |
| C  | -5.2021470 | 0.5072930  | -1.264839 |
| C  | -5.0507570 | -0.1591610 | 0.124946  |
| C  | -5.8686150 | -1.4691290 | 0.138967  |
| C  | -5.6151270 | 0.8020000  | 1.195375  |
| O  | -3.7229870 | -0.4267490 | 0.373136  |
| Na | -1.9617780 | -0.3219790 | -0.845321 |
| Na | -2.0966360 | -0.6526870 | 1.726347  |
| O  | -0.8111670 | -1.8798220 | 0.302017  |
| O  | -0.6835660 | 0.8307020  | 0.805681  |
| C  | -0.8481020 | -3.2711470 | 0.175886  |
| C  | -1.2210510 | -3.6423370 | -1.273754 |
| C  | -1.9342840 | -3.8161260 | 1.125242  |
| C  | 0.5136300  | -3.8880870 | 0.535859  |
| Si | -0.5239850 | 2.4445460  | 0.537202  |
| C  | -2.1948650 | 3.3081680  | 0.754934  |
| C  | 0.7255690  | 3.2814890  | 1.694110  |
| Si | 0.2275660  | 2.7195150  | -1.683435 |
| C  | -0.2858110 | 4.3694540  | -2.467139 |
| C  | -0.5240310 | 1.3180720  | -2.747478 |
| C  | 2.1147810  | 2.5473810  | -1.778537 |
| H  | -4.8129760 | -0.1709520 | -2.045268 |
| H  | -4.6136340 | 1.4405550  | -1.293649 |
| H  | -6.9425760 | -1.3128010 | -0.063297 |
| H  | -6.6769710 | 1.0561030  | 1.033409  |
| H  | -5.0289270 | 1.7348970  | 1.200442  |
| H  | -5.4667070 | -2.1621490 | -0.618346 |
| H  | -2.2047630 | -3.2127010 | -1.527345 |
| H  | -2.5662530 | 3.1739210  | 1.785694  |
| H  | -5.7670770 | -1.9550130 | 1.123221  |
| H  | -5.5217640 | 0.3377080  | 2.191767  |
| H  | -2.9486170 | 2.8693960  | 0.081604  |
| H  | -0.4717060 | -3.2318760 | -1.969811 |
| H  | -2.1333090 | 4.3902660  | 0.550826  |
| H  | -1.2754820 | -4.7315650 | -1.435488 |
| H  | -2.8993430 | -3.3359120 | 0.895881  |
| H  | 0.4527560  | 3.1226340  | 2.751840  |
| H  | -2.0592500 | -4.9088790 | 1.048960  |
| H  | 0.7561460  | 4.3696390  | 1.514038  |
| H  | -1.6658580 | -3.5843140 | 2.171356  |

|   |            |            |           |
|---|------------|------------|-----------|
| H | 1.7415560  | 2.8848960  | 1.542971  |
| H | -1.3823980 | 4.4825150  | -2.464867 |
| H | 0.5000110  | -4.9893560 | 0.482734  |
| H | 1.2929500  | -3.5187210 | -0.148326 |
| H | 0.1358620  | 5.2181570  | -1.903559 |
| H | 0.7967010  | -3.5926170 | 1.558950  |
| H | -0.2113190 | 1.3930620  | -3.801748 |
| H | 2.6083900  | 3.3766940  | -1.246020 |
| H | -1.6283770 | 1.3518440  | -2.737465 |
| H | 0.0632780  | 4.4509260  | -3.510651 |
| H | 2.4262880  | 1.6061200  | -1.303078 |
| H | -0.1734710 | 0.3404010  | -2.376612 |
| H | 2.4786220  | 2.5455880  | -2.819981 |
| H | -6.2460900 | 0.7540630  | -1.523352 |

**TS-E1**

|    |           |           |           |
|----|-----------|-----------|-----------|
| Cu | 1.408723  | -0.069104 | -0.017420 |
| N  | 1.250466  | -1.834833 | -1.004435 |
| N  | 0.720942  | -1.250678 | 1.564278  |
| C  | 0.465903  | -0.867937 | 2.820654  |
| C  | 0.285498  | -2.445994 | 1.120648  |
| C  | -0.389448 | -3.323016 | 1.983993  |
| C  | -0.242916 | -1.661460 | 3.719472  |
| C  | -0.667584 | -2.922270 | 3.285610  |
| H  | 0.849067  | 0.115115  | 3.113128  |
| H  | -0.440061 | -1.308323 | 4.732788  |
| H  | -1.215641 | -3.585656 | 3.957796  |
| C  | 1.555596  | -2.058402 | -2.286919 |
| C  | 0.610200  | -2.783360 | -0.290659 |
| C  | 0.325644  | -4.032342 | -0.858133 |
| C  | 1.267070  | -3.259119 | -2.930593 |
| C  | 0.650100  | -4.269908 | -2.189722 |
| H  | 2.055998  | -1.242037 | -2.814050 |
| H  | 1.530960  | -3.397765 | -3.980079 |
| H  | 0.417952  | -5.234054 | -2.646836 |
| H  | -0.166175 | -4.807079 | -0.274095 |
| H  | -0.722995 | -4.297889 | 1.634652  |
| C  | -2.473667 | 4.001257  | -1.066514 |
| C  | -3.320744 | 3.082289  | -0.151140 |
| C  | -4.819380 | 3.346724  | -0.413897 |
| C  | -3.004322 | 3.450207  | 1.323354  |
| O  | -3.020013 | 1.760991  | -0.383222 |
| Na | -1.615352 | 0.657617  | -1.641648 |
| Na | -1.653803 | 0.633711  | 0.895993  |
| O  | -1.773966 | -1.217177 | -0.386268 |
| O  | 0.081067  | 1.456313  | -0.393533 |
| C  | -3.039427 | -1.792782 | -0.412979 |
| C  | -3.908067 | -1.162153 | -1.530289 |
| C  | -3.762370 | -1.558884 | 0.938235  |
| C  | -2.947500 | -3.311540 | -0.672206 |
| Si | 1.467656  | 2.301180  | -0.177905 |
| C  | 1.921531  | 3.320516  | -1.698262 |
| C  | 1.369775  | 3.400510  | 1.351966  |
| Si | 3.657600  | 0.999651  | 0.091158  |
| C  | 4.629513  | 2.506349  | 0.738842  |
| C  | 4.424480  | 0.541884  | -1.586715 |
| C  | 4.093724  | -0.388094 | 1.328614  |
| H  | -2.696934 | 3.772882  | -2.122918 |
| H  | -1.405196 | 3.794558  | -0.893705 |
| H  | -5.114436 | 4.395888  | -0.235745 |
| H  | -3.252655 | 4.493511  | 1.584148  |
| H  | -1.925888 | 3.308981  | 1.520449  |
| H  | -5.056809 | 3.088537  | -1.458541 |
| H  | -4.030650 | -0.083356 | -1.336395 |
| H  | 1.120978  | 4.061240  | -1.865848 |
| H  | -5.424983 | 2.694426  | 0.235795  |
| H  | -3.574101 | 2.785705  | 1.995882  |
| H  | 1.975883  | 2.675143  | -2.589067 |
| H  | -3.416439 | -1.314357 | -2.509787 |

|   |           |           |           |
|---|-----------|-----------|-----------|
| H | 2.874974  | 3.861778  | -1.601251 |
| H | -4.910671 | -1.618026 | -1.595874 |
| H | -3.955254 | -0.480933 | 1.072661  |
| H | 0.485250  | 4.051028  | 1.244174  |
| H | -4.735407 | -2.074768 | 1.004334  |
| H | 2.253479  | 4.039783  | 1.493722  |
| H | -3.126728 | -1.921430 | 1.763968  |
| H | 1.229488  | 2.796244  | 2.263153  |
| H | 4.497103  | 3.405923  | 0.118716  |
| H | -3.941359 | -3.782784 | -0.754774 |
| H | -2.396384 | -3.494442 | -1.607821 |
| H | 4.334681  | -2.758525 | 1.769388  |
| H | -2.407324 | -3.811785 | 0.145921  |
| H | 5.522644  | 0.476101  | -1.500834 |
| H | 3.654877  | -0.196834 | 2.320725  |
| H | 4.191024  | 1.294318  | -2.356582 |
| H | 5.704590  | 2.256828  | 0.746529  |
| H | 3.741561  | -1.374129 | 0.990865  |
| H | 4.059449  | -0.434287 | -1.942480 |
| H | 5.190717  | -0.433536 | 1.448208  |
| H | -2.658659 | 5.077466  | -0.903336 |

**INT-E3**

|    |           |           |           |
|----|-----------|-----------|-----------|
| Cu | 1.494532  | 0.026325  | 0.018978  |
| N  | 1.242141  | -1.702730 | -1.045304 |
| N  | 0.726129  | -1.199035 | 1.534834  |
| C  | 0.498254  | -0.863645 | 2.810068  |
| C  | 0.317435  | -2.394906 | 1.067011  |
| C  | -0.294392 | -3.322667 | 1.924274  |
| C  | -0.153719 | -1.708709 | 3.704727  |
| C  | -0.544307 | -2.971653 | 3.245613  |
| H  | 0.858198  | 0.122211  | 3.121368  |
| H  | -0.331235 | -1.393365 | 4.733929  |
| H  | -1.043041 | -3.676001 | 3.914563  |
| C  | 1.519454  | -1.866712 | -2.342703 |
| C  | 0.610246  | -2.676955 | -0.362901 |
| C  | 0.312001  | -3.900600 | -0.977611 |
| C  | 1.211371  | -3.035577 | -3.033745 |
| C  | 0.608437  | -4.078008 | -2.324377 |
| H  | 2.016628  | -1.029493 | -2.839649 |
| H  | 1.452570  | -3.128681 | -4.093670 |
| H  | 0.364508  | -5.020393 | -2.819292 |
| H  | -0.172948 | -4.698032 | -0.419343 |
| H  | -0.597874 | -4.300363 | 1.556075  |
| C  | -2.586938 | 3.940026  | -1.070767 |
| C  | -3.378323 | 3.017245  | -0.110410 |
| C  | -4.890511 | 3.270773  | -0.294524 |
| C  | -2.987409 | 3.391484  | 1.344877  |
| O  | -3.081124 | 1.697403  | -0.354844 |
| Na | -1.687712 | 0.608896  | -1.642006 |
| Na | -1.663218 | 0.596025  | 0.894314  |
| O  | -1.800304 | -1.261732 | -0.378876 |
| O  | 0.011301  | 1.462820  | -0.436806 |
| C  | -3.061551 | -1.847591 | -0.350817 |
| C  | -3.977557 | -1.231771 | -1.437665 |
| C  | -3.731688 | -1.608756 | 1.026550  |
| C  | -2.969819 | -3.367846 | -0.602004 |
| Si | 1.394000  | 2.299970  | -0.214204 |
| C  | 1.955099  | 3.248029  | -1.740835 |
| C  | 1.315577  | 3.433039  | 1.288274  |
| Si | 3.694752  | 0.886493  | 0.126864  |
| C  | 4.551904  | 2.430023  | 0.842527  |
| C  | 4.499756  | 0.552267  | -1.563210 |
| C  | 4.234719  | -0.520209 | 1.301572  |
| H  | -2.861994 | 3.705403  | -2.113427 |
| H  | -1.509109 | 3.743503  | -0.951534 |
| H  | -5.183149 | 4.318440  | -0.103857 |
| H  | -3.229257 | 4.433660  | 1.616056  |
| H  | -1.899288 | 3.258563  | 1.485208  |

|   |           |           |           |
|---|-----------|-----------|-----------|
| H | -5.180799 | 3.007597  | -1.324427 |
| H | -4.099376 | -0.152252 | -1.247606 |
| H | 1.214297  | 4.040397  | -1.943733 |
| H | -5.456481 | 2.616348  | 0.387985  |
| H | -3.517266 | 2.725521  | 2.048195  |
| H | 1.987153  | 2.581052  | -2.616037 |
| H | -3.523585 | -1.388569 | -2.434325 |
| H | 2.941056  | 3.723230  | -1.626556 |
| H | -4.978435 | -1.695623 | -1.459540 |
| H | -3.931235 | -0.531822 | 1.159419  |
| H | 0.474925  | 4.131307  | 1.136746  |
| H | -4.695834 | -2.133714 | 1.135858  |
| H | 2.230144  | 4.022186  | 1.446054  |
| H | -3.060175 | -1.957954 | 1.829374  |
| H | 1.108611  | 2.857421  | 2.204540  |
| H | 4.385893  | 3.341952  | 0.249140  |
| H | -3.963471 | -3.845162 | -0.636551 |
| H | -2.461208 | -3.555127 | -1.560489 |
| H | 4.219138  | 2.631392  | 1.872917  |
| H | -2.391146 | -3.858607 | 0.195346  |
| H | 5.599622  | 0.550442  | -1.472057 |
| H | 3.803945  | -0.390585 | 2.307345  |
| H | 4.224583  | 1.317758  | -2.305598 |
| H | 5.639375  | 2.243695  | 0.871002  |
| H | 3.919647  | -1.506351 | 0.927155  |
| H | 4.196451  | -0.429972 | -1.959375 |
| H | 5.334649  | -0.522482 | 1.401774  |
| H | -2.773310 | 5.015182  | -0.902024 |

**TS-E2**

|    |           |           |           |
|----|-----------|-----------|-----------|
| Cu | -1.515007 | -0.118126 | -0.013712 |
| N  | -1.316163 | 1.603573  | -1.091435 |
| N  | -0.883478 | 1.172137  | 1.518239  |
| C  | -0.667285 | 0.860113  | 2.801116  |
| C  | -0.517373 | 2.378587  | 1.045465  |
| C  | 0.032632  | 3.343232  | 1.904300  |
| C  | -0.073176 | 1.743041  | 3.699505  |
| C  | 0.269486  | 3.017982  | 3.234323  |
| H  | -0.988965 | -0.137848 | 3.115642  |
| H  | 0.096383  | 1.447074  | 4.735835  |
| H  | 0.721974  | 3.750963  | 3.905404  |
| C  | -1.562584 | 1.740195  | -2.398207 |
| C  | -0.785482 | 2.628162  | -0.395245 |
| C  | -0.564351 | 3.868278  | -1.009029 |
| C  | -1.323501 | 2.926332  | -3.087423 |
| C  | -0.828396 | 4.015985  | -2.366335 |
| H  | -1.976457 | 0.864882  | -2.905699 |
| H  | -1.535648 | 2.994946  | -4.155374 |
| H  | -0.643490 | 4.972652  | -2.859399 |
| H  | -0.165454 | 4.704871  | -0.439827 |
| H  | 0.302827  | 4.328510  | 1.530541  |
| C  | 3.675590  | -3.353972 | -1.614528 |
| C  | 3.698117  | -2.786190 | -0.172947 |
| C  | 5.155438  | -2.789197 | 0.339354  |
| C  | 2.844986  | -3.717941 | 0.724155  |
| O  | 3.190515  | -1.508286 | -0.158889 |
| Na | 1.718796  | -0.561479 | -1.499683 |
| Na | 1.692200  | -0.495287 | 1.033329  |
| O  | 1.706207  | 1.343365  | -0.289760 |
| O  | 0.076865  | -1.494488 | -0.272536 |
| C  | 2.925202  | 2.013967  | -0.292581 |
| C  | 3.863001  | 1.443403  | -1.385748 |
| C  | 3.631905  | 1.843643  | 1.076103  |
| C  | 2.727785  | 3.519742  | -0.567547 |
| Si | -1.270206 | -2.388653 | -0.051210 |
| C  | -1.675212 | -3.511378 | -1.506828 |
| C  | -1.240002 | -3.362500 | 1.561858  |
| Si | -3.667468 | -1.091191 | 0.005468  |
| C  | -4.480810 | -2.611877 | 0.814773  |

|   |           |           |           |
|---|-----------|-----------|-----------|
| C | -4.370605 | -0.970785 | -1.757340 |
| C | -4.368701 | 0.383363  | 0.997734  |
| H | 4.252797  | -2.689130 | -2.278486 |
| H | 2.634016  | -3.391249 | -1.981748 |
| H | 5.612127  | -3.794597 | 0.347400  |
| H | 3.197392  | -4.764143 | 0.735336  |
| H | 1.801675  | -3.698593 | 0.371120  |
| H | 5.768852  | -2.129281 | -0.294786 |
| H | 4.060642  | 0.379061  | -1.175896 |
| H | -0.880572 | -4.273354 | -1.583268 |
| H | 5.182896  | -2.385081 | 1.364716  |
| H | 2.858703  | -3.344785 | 1.763899  |
| H | -1.684414 | -2.935617 | -2.445024 |
| H | 3.381645  | 1.548627  | -2.376319 |
| H | -2.639256 | -4.032387 | -1.406157 |
| H | 4.829326  | 1.973586  | -1.434406 |
| H | 3.899301  | 0.783561  | 1.223339  |
| H | -0.329223 | -3.984970 | 1.562461  |
| H | 4.562899  | 2.429896  | 1.158462  |
| H | -2.110674 | -4.020718 | 1.693271  |
| H | 2.953176  | 2.166631  | 1.884198  |
| H | -1.182698 | -2.686611 | 2.430046  |
| H | -4.227166 | -3.562249 | 0.321101  |
| H | 3.686507  | 4.062663  | -0.616860 |
| H | 2.202498  | 3.656777  | -1.525413 |
| H | -4.201948 | -2.697259 | 1.876818  |
| H | 2.121890  | 3.982761  | 0.226060  |
| H | -5.472549 | -1.028436 | -1.736674 |
| H | -4.002044 | 0.378073  | 2.036640  |
| H | -4.002470 | -1.784800 | -2.401197 |
| H | -5.576681 | -2.491212 | 0.763635  |
| H | -4.085346 | 1.347481  | 0.548071  |
| H | -4.096670 | -0.013955 | -2.229958 |
| H | -5.471301 | 0.324933  | 1.026337  |
| H | 4.096015  | -4.371580 | -1.693602 |

**INT-E4**

|    |           |           |           |
|----|-----------|-----------|-----------|
| Cu | -1.524324 | -0.128584 | -0.020352 |
| N  | -1.347921 | 1.599190  | -1.092049 |
| N  | -0.893375 | 1.161568  | 1.512395  |
| C  | -0.675055 | 0.850302  | 2.795052  |
| C  | -0.542056 | 2.373524  | 1.042057  |
| C  | -0.004384 | 3.343074  | 1.903075  |
| C  | -0.092532 | 1.738834  | 3.695570  |
| C  | 0.235285  | 3.018427  | 3.232842  |
| H  | -0.985316 | -0.151867 | 3.107779  |
| H  | 0.079487  | 1.443195  | 4.731581  |
| H  | 0.678027  | 3.755791  | 3.905613  |
| C  | -1.600148 | 1.736038  | -2.397767 |
| C  | -0.814238 | 2.623429  | -0.397861 |
| C  | -0.593857 | 3.863222  | -1.012646 |
| C  | -1.363545 | 2.922205  | -3.087683 |
| C  | -0.863692 | 4.011207  | -2.368741 |
| H  | -2.016585 | 0.860853  | -2.903424 |
| H  | -1.580680 | 2.991353  | -4.154604 |
| H  | -0.679495 | 4.967569  | -2.862663 |
| H  | -0.190510 | 4.699039  | -0.445533 |
| H  | 0.252822  | 4.332739  | 1.531682  |
| C  | 3.974597  | -3.245929 | -1.611961 |
| C  | 3.748671  | -2.751153 | -0.161933 |
| C  | 5.109600  | -2.721175 | 0.569073  |
| C  | 2.815105  | -3.760216 | 0.553149  |
| O  | 3.186125  | -1.496416 | -0.171101 |
| Na | 1.730578  | -0.541354 | -1.520974 |
| Na | 1.675621  | -0.490447 | 1.010288  |
| O  | 1.693885  | 1.355570  | -0.299122 |
| O  | 0.077063  | -1.481973 | -0.321876 |
| C  | 2.907392  | 2.035286  | -0.284776 |
| C  | 3.863153  | 1.474565  | -1.367381 |



|    |           |           |           |
|----|-----------|-----------|-----------|
| C  | 3.598116  | 1.866552  | 1.092326  |
| C  | 2.701871  | 3.540338  | -0.557907 |
| Si | -1.252513 | -2.396205 | -0.079654 |
| C  | -1.671670 | -3.517587 | -1.532218 |
| C  | -1.174842 | -3.376534 | 1.527781  |
| Si | -3.663583 | -1.129260 | 0.028091  |
| C  | -4.442942 | -2.665331 | 0.841842  |
| C  | -4.397151 | -1.005958 | -1.722048 |
| C  | -4.367452 | 0.329858  | 1.041280  |
| H  | 4.614492  | -2.526722 | -2.148892 |
| H  | 3.005110  | -3.303932 | -2.138984 |
| H  | 5.609300  | -3.705364 | 0.600178  |
| H  | 3.212457  | -4.790099 | 0.571366  |
| H  | 1.835267  | -3.765889 | 0.049664  |
| H  | 5.778443  | -2.002301 | 0.069540  |
| H  | 4.062957  | 0.410348  | -1.158976 |
| H  | -0.871216 | -4.271657 | -1.624756 |
| H  | 4.961224  | -2.373758 | 1.605183  |
| H  | 2.653744  | -3.440433 | 1.598261  |
| H  | -1.702471 | -2.938568 | -2.467921 |
| H  | 3.394895  | 1.581038  | -2.364051 |
| H  | -2.628661 | -4.048416 | -1.416889 |
| H  | 4.827375  | 2.009746  | -1.400791 |
| H  | 3.870658  | 0.807951  | 1.240850  |
| H  | -0.251276 | -3.979484 | 1.507250  |
| H  | 4.524109  | 2.458705  | 1.187886  |
| H  | -2.029490 | -4.052902 | 1.672092  |
| H  | 2.907140  | 2.182583  | 1.892625  |
| H  | -1.115328 | -2.703661 | 2.398242  |
| H  | -4.185267 | -3.609378 | 0.338251  |
| H  | 3.656865  | 4.090716  | -0.595975 |
| H  | 2.185130  | 3.675755  | -1.520686 |
| H  | -4.144281 | -2.753135 | 1.898331  |
| H  | 2.084361  | 3.996408  | 0.230730  |
| H  | -5.498164 | -1.071803 | -1.683480 |
| H  | -3.984560 | 0.322417  | 2.074307  |
| H  | -4.033747 | -1.814050 | -2.375958 |
| H  | -5.541070 | -2.559225 | 0.810694  |
| H  | -4.103270 | 1.300391  | 0.593730  |
| H  | -4.137768 | -0.044872 | -2.194384 |
| H  | -5.468655 | 0.257302  | 1.086736  |
| H  | 4.447646  | -4.241751 | -1.667332 |

**TS-E3**

|    |           |           |           |
|----|-----------|-----------|-----------|
| Cu | 2.134619  | -0.528250 | 0.089583  |
| N  | 1.411401  | -2.166291 | -1.038751 |
| N  | 1.199814  | -1.771422 | 1.602564  |
| C  | 1.141744  | -1.461309 | 2.898048  |
| C  | 0.153444  | -2.373814 | 1.006240  |
| C  | -1.012523 | -2.677785 | 1.722939  |
| C  | 0.015875  | -1.722903 | 3.683257  |
| C  | -1.079702 | -2.342026 | 3.075684  |
| H  | 2.022899  | -0.967413 | 3.318247  |
| H  | 0.002177  | -1.445000 | 4.738685  |
| H  | -1.987390 | -2.554092 | 3.645218  |
| C  | 1.577717  | -2.292057 | -2.356138 |
| C  | 0.277206  | -2.607542 | -0.459079 |
| C  | -0.747679 | -3.183459 | -1.218293 |
| C  | 0.607493  | -2.862260 | -3.183091 |
| C  | -0.578270 | -3.307827 | -2.596736 |
| H  | 2.515004  | -1.904675 | -2.765549 |
| H  | 0.778905  | -2.942182 | -4.258011 |
| H  | -1.374185 | -3.741305 | -3.206266 |
| H  | -1.679187 | -3.490328 | -0.753392 |
| H  | -1.870930 | -3.118231 | 1.225233  |
| C  | -2.856740 | 3.666147  | -1.657165 |
| C  | -2.405712 | 3.492348  | -0.185855 |
| C  | -3.665748 | 3.392030  | 0.704509  |
| C  | -1.604880 | 4.744527  | 0.234421  |

|    |           |           |           |
|----|-----------|-----------|-----------|
| O  | -1.636438 | 2.350208  | -0.059492 |
| Na | -1.645216 | 0.556877  | -1.412150 |
| Na | -1.714064 | 0.505004  | 1.158239  |
| O  | -2.765999 | -0.884688 | -0.197393 |
| O  | 0.172211  | 0.308558  | -0.119329 |
| C  | -4.114402 | -1.173095 | -0.180691 |
| C  | -4.864876 | -0.323356 | -1.234438 |
| C  | -4.711629 | -0.861201 | 1.214534  |
| C  | -4.361834 | -2.666991 | -0.497071 |
| Si | 1.166273  | 1.578485  | 0.015117  |
| C  | 1.437939  | 2.654663  | -1.492484 |
| C  | 1.198896  | 2.480147  | 1.657019  |
| Si | 4.105623  | 0.618832  | -0.102775 |
| C  | 4.571313  | 2.295531  | 0.675725  |
| C  | 4.619191  | 0.720452  | -1.937568 |
| C  | 5.305953  | -0.624974 | 0.717238  |
| H  | -3.462782 | 2.796773  | -1.968120 |
| H  | -1.970752 | 3.721825  | -2.312255 |
| H  | -4.319763 | 4.278258  | 0.637073  |
| H  | -2.183676 | 5.677234  | 0.124866  |
| H  | -0.691398 | 4.833523  | -0.374991 |
| H  | -4.255540 | 2.506638  | 0.417164  |
| H  | -4.706157 | 0.747442  | -1.028203 |
| H  | 0.572377  | 3.328757  | -1.578263 |
| H  | -3.363039 | 3.271919  | 1.759215  |
| H  | -1.297467 | 4.657078  | 1.289239  |
| H  | 1.494531  | 2.029810  | -2.396996 |
| H  | -4.464031 | -0.543058 | -2.239681 |
| H  | 2.356358  | 3.256124  | -1.426824 |
| H  | -5.952111 | -0.510259 | -1.256628 |
| H  | -4.588378 | 0.211546  | 1.443150  |
| H  | 0.265211  | 3.058676  | 1.721610  |
| H  | -5.785986 | -1.098268 | 1.296773  |
| H  | 2.055337  | 3.161984  | 1.751333  |
| H  | -4.174471 | -1.442387 | 1.983873  |
| H  | 1.235487  | 1.756966  | 2.486816  |
| H  | 4.026886  | 3.146134  | 0.236652  |
| H  | -5.432175 | -2.933130 | -0.513074 |
| H  | -3.932064 | -2.912200 | -1.481949 |
| H  | 4.378635  | 2.298882  | 1.760795  |
| H  | -3.871054 | -3.303125 | 0.259143  |
| H  | 5.671827  | 1.039240  | -2.035132 |
| H  | 5.108690  | -0.716624 | 1.798128  |
| H  | 3.996721  | 1.435667  | -2.498002 |
| H  | 5.649369  | 2.480168  | 0.526658  |
| H  | 5.208388  | -1.629948 | 0.275709  |
| H  | 4.522567  | -0.262586 | -2.428597 |
| H  | 6.353112  | -0.295696 | 0.591588  |
| H  | -3.463699 | 4.571888  | -1.825902 |

**INT-E5**

|    |           |           |           |
|----|-----------|-----------|-----------|
| Cu | 0.922574  | 1.493003  | 0.783844  |
| N  | 2.649728  | -0.043155 | 0.144396  |
| N  | 0.710338  | -0.072344 | 2.100990  |
| C  | -0.440751 | -0.176519 | 2.787891  |
| C  | 1.429101  | -1.193776 | 1.859084  |
| C  | 0.996810  | -2.455073 | 2.298651  |
| C  | -0.944572 | -1.392009 | 3.240554  |
| C  | -0.208984 | -2.560596 | 2.987956  |
| H  | -0.980671 | 0.756223  | 2.959735  |
| H  | -1.892292 | -1.421991 | 3.780930  |
| H  | -0.576286 | -3.535242 | 3.316197  |
| C  | 3.777070  | 0.223719  | -0.530569 |
| C  | 2.674952  | -1.006685 | 1.089715  |
| C  | 3.834669  | -1.746915 | 1.361154  |
| C  | 4.967170  | -0.471509 | -0.330839 |
| C  | 4.993277  | -1.483430 | 0.635234  |
| H  | 3.717378  | 1.032401  | -1.264722 |
| H  | 5.851734  | -0.223621 | -0.919907 |

|    |           |           |           |
|----|-----------|-----------|-----------|
| H  | 5.908750  | -2.045964 | 0.830178  |
| H  | 3.830042  | -2.501197 | 2.149281  |
| H  | 1.581111  | -3.342737 | 2.054894  |
| C  | -4.975802 | -0.730068 | -1.524360 |
| C  | -4.603163 | -0.479976 | -0.058017 |
| C  | -4.787203 | -1.761707 | 0.762363  |
| C  | -5.456191 | 0.647398  | 0.533644  |
| O  | -3.212308 | -0.163174 | 0.020443  |
| Na | 0.759624  | -0.000783 | -1.601602 |
| Na | -1.340638 | -1.510773 | -0.094758 |
| O  | 0.219131  | -2.067610 | -1.439276 |
| O  | -0.801484 | 0.682176  | -0.220757 |
| C  | 0.623802  | -3.310904 | -1.884823 |
| C  | 0.406207  | -3.428633 | -3.408163 |
| C  | -0.197013 | -4.415864 | -1.177072 |
| C  | 2.120261  | -3.531400 | -1.570475 |
| Si | -2.298916 | 1.290256  | -0.206480 |
| C  | -2.782990 | 2.098609  | -1.833584 |
| C  | -2.623872 | 2.462667  | 1.228718  |
| Si | 1.470888  | 3.355695  | -0.424222 |
| C  | 0.242674  | 4.828603  | -0.420633 |
| C  | 1.397393  | 2.773830  | -2.285311 |
| C  | 3.201635  | 4.169962  | -0.296079 |
| H  | -4.327213 | -1.510704 | -1.952122 |
| H  | -4.847375 | 0.183423  | -2.121987 |
| H  | -5.837800 | -2.089789 | 0.769676  |
| H  | -6.523117 | 0.377237  | 0.515706  |
| H  | -5.336058 | 1.577579  | -0.041475 |
| H  | -4.182495 | -2.580598 | 0.337791  |
| H  | -0.656120 | -3.254218 | -3.643791 |
| H  | -3.830086 | 2.440385  | -1.860824 |
| H  | -4.464077 | -1.593790 | 1.801378  |
| H  | -5.166109 | 0.847574  | 1.575626  |
| H  | -2.623362 | 1.403699  | -2.673933 |
| H  | 0.995955  | -2.654321 | -3.927103 |
| H  | -2.140885 | 2.979400  | -1.999304 |
| H  | 0.698883  | -4.412594 | -3.812997 |
| H  | -1.270275 | -4.285087 | -1.402342 |
| H  | -3.524278 | 3.079993  | 1.085209  |
| H  | 0.087917  | -5.437168 | -1.481371 |
| H  | -1.755995 | 3.134143  | 1.331869  |
| H  | -0.060610 | -4.336602 | -0.084309 |
| H  | -2.741804 | 1.910116  | 2.174333  |
| H  | -0.787695 | 4.488856  | -0.619698 |
| H  | 2.496503  | -4.506327 | -1.924520 |
| H  | 2.722008  | -2.737392 | -2.043237 |
| H  | 0.234068  | 5.329047  | 0.562478  |
| H  | 2.287921  | -3.468516 | -0.484226 |
| H  | 1.611195  | 3.599045  | -2.987512 |
| H  | 3.321651  | 4.667072  | 0.681529  |
| H  | 0.389199  | 2.397269  | -2.537749 |
| H  | 0.500279  | 5.586475  | -1.182489 |
| H  | 4.009264  | 3.421635  | -0.374073 |
| H  | 2.135954  | 1.981758  | -2.518862 |
| H  | 3.366355  | 4.928854  | -1.082584 |
| H  | -6.022718 | -1.058608 | -1.618596 |

## 12

|    |           |           |           |
|----|-----------|-----------|-----------|
| Na | -0.069018 | 1.419188  | -0.000320 |
| O  | -1.576084 | -0.092188 | -0.000362 |
| C  | -2.957417 | -0.014837 | 0.000041  |
| C  | -3.400885 | 1.467083  | 0.002546  |
| C  | -3.528647 | -0.700438 | -1.259294 |
| C  | -3.528139 | -0.704498 | 1.257400  |
| H  | -3.109271 | -0.226462 | -2.161468 |
| H  | -3.234925 | -1.763750 | -1.269738 |
| H  | -4.629249 | -0.649391 | -1.315956 |

|    |           |           |           |
|----|-----------|-----------|-----------|
| H  | -3.003925 | 1.974274  | 0.899728  |
| H  | -3.004383 | 1.977175  | -0.893199 |
| H  | -4.496324 | 1.594452  | 0.003012  |
| H  | -3.234489 | -1.767868 | 1.264252  |
| H  | -3.108352 | -0.233455 | 2.160919  |
| H  | -4.628712 | -0.653607 | 1.314710  |
| Na | 0.069021  | -1.419183 | -0.000320 |
| O  | 1.576084  | 0.092194  | -0.000351 |
| C  | 2.957417  | 0.014836  | 0.000045  |
| C  | 3.400876  | -1.467087 | 0.002429  |
| C  | 3.528645  | 0.700532  | -1.259242 |
| C  | 3.528147  | 0.704398  | 1.257452  |
| H  | 3.234516  | 1.767771  | 1.264378  |
| H  | 3.108346  | 0.233301  | 2.160935  |
| H  | 4.628719  | 0.653472  | 1.314761  |
| H  | 3.109280  | 0.226616  | -2.161452 |
| H  | 3.234913  | 1.763843  | -1.269606 |
| H  | 4.629247  | 0.649510  | -1.315903 |
| H  | 3.003914  | -1.974348 | 0.899570  |
| H  | 3.004370  | -1.977103 | -0.893358 |
| H  | 4.496315  | -1.594464 | 0.002881  |

## 13

|    |           |           |           |
|----|-----------|-----------|-----------|
| O  | -0.804405 | -1.881372 | 0.018060  |
| Si | -2.180668 | -1.053921 | -0.125052 |
| C  | -3.254752 | -1.037612 | 1.425782  |
| C  | -3.243465 | -1.580566 | -1.585764 |
| H  | -3.535813 | -2.080193 | 1.651699  |
| H  | -2.731387 | -0.640733 | 2.309448  |
| H  | -4.186422 | -0.465919 | 1.288851  |
| H  | -2.667540 | -1.526436 | -2.524736 |
| H  | -3.584934 | -2.621985 | -1.466547 |
| H  | -4.131128 | -0.936726 | -1.698631 |
| Na | 0.405911  | -0.361815 | -1.192590 |
| O  | 2.133093  | -0.550722 | 0.069768  |
| C  | 3.369886  | 0.063249  | -0.035691 |
| C  | 3.405477  | 0.954413  | -1.299389 |
| C  | 3.631137  | 0.948671  | 1.201177  |
| C  | 4.484678  | -0.997897 | -0.145160 |
| H  | 2.842691  | 1.713393  | 1.288320  |
| H  | 3.601795  | 0.330016  | 2.113734  |
| H  | 4.608198  | 1.459518  | 1.164039  |
| H  | 3.224173  | 0.338067  | -2.197569 |
| H  | 2.615621  | 1.723221  | -1.237383 |
| H  | 4.367745  | 1.474704  | -1.438444 |
| H  | 4.484361  | -1.632651 | 0.757357  |
| H  | 4.294153  | -1.647120 | -1.015178 |
| H  | 5.490426  | -0.557218 | -0.251589 |
| Na | 1.002983  | -2.001920 | 1.105722  |
| O  | -1.688719 | 0.542034  | -0.601454 |
| C  | -1.496647 | 1.759596  | 0.126009  |
| C  | -0.608970 | 1.525512  | 1.359154  |
| C  | -0.794568 | 2.722717  | -0.839850 |
| C  | -2.856895 | 2.339202  | 0.529843  |
| H  | -3.494465 | 2.453438  | -0.359927 |
| H  | -3.371649 | 1.678611  | 1.240580  |
| H  | -2.739124 | 3.325247  | 1.005842  |
| H  | 0.207657  | 2.350426  | -1.112048 |
| H  | -1.387218 | 2.832235  | -1.760333 |
| H  | -0.659584 | 3.716021  | -0.385747 |
| H  | -1.100861 | 0.849474  | 2.073697  |
| H  | 0.359206  | 1.081908  | 1.074003  |
| H  | -0.409426 | 2.475457  | 1.879197  |

## Mass Spectroscopic Analysis of the Reaction

An oven-dried 20-mL Schlenk tube equipped with a greaseless stopcock and a magnetic stir bar was charged with  $\text{CuCl}[\text{P}(\text{OPh})_3]$  (4.1 mg, 0.010 mmol), diphenylacetylene (**2a**, 35.6 mg, 0.200 mmol), **1-Me** (68.1 mg, 0.400 mmol), DCE (1.0 mL) and *t*BuOH (38.0  $\mu\text{L}$ , 0.400 mmol). DCE (1.0 mL) was added to the mixture to rinse the inside wall of the tube. The resulting mixture was stirred at 50 °C. After 16 h, the reaction mixture was cooled to room temperature and the reaction mixture was directly analyzed by Low-resolution mass spectroscopy using positive APCI.

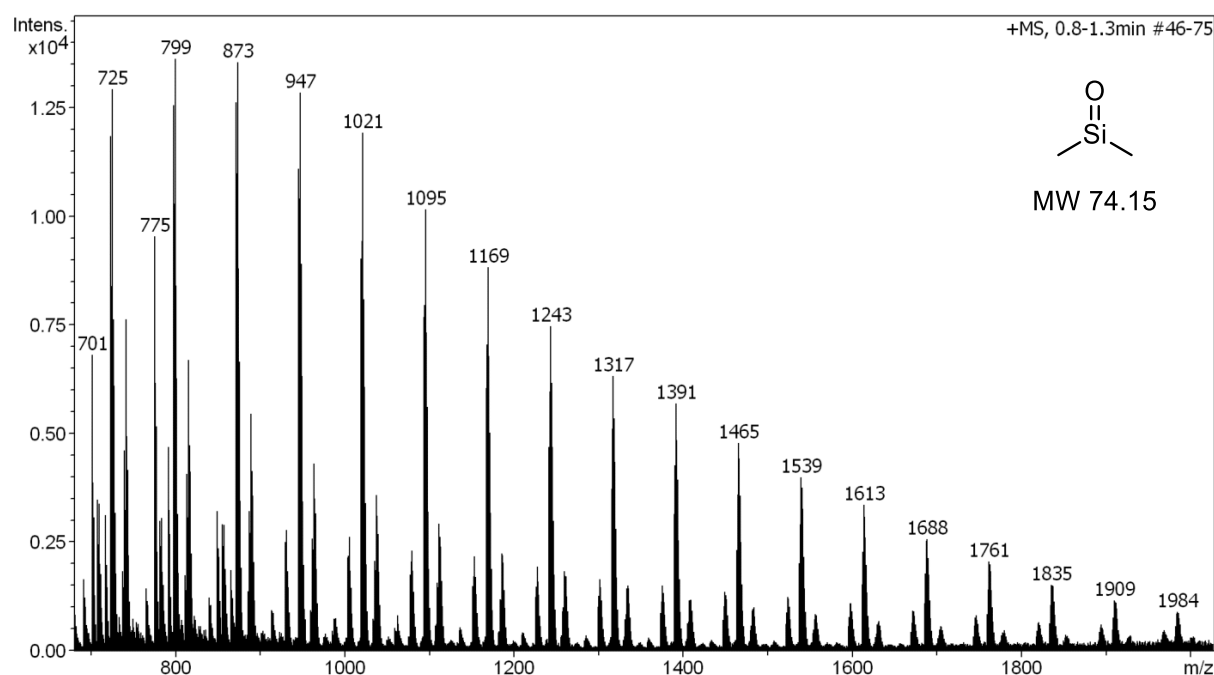

**Figure S4. Positive APCI mass spectrum of the reaction mixture of **1a** after completion of the reaction**

The Low-resolution mass spectrum of the reaction mixture of **1a** after completion of the reaction is shown in Figure S4. The spectrum shows molecular weight distribution that fitted with the Gaussian distribution with interval of 74 mass units corresponding to the repeat unit of polydimethylsiloxane. Considering that the molecular weight of dimethylsilanone is 74.15, this result implies the formation of polydimethylsiloxane that is observed through a random cleavage during the ionization.

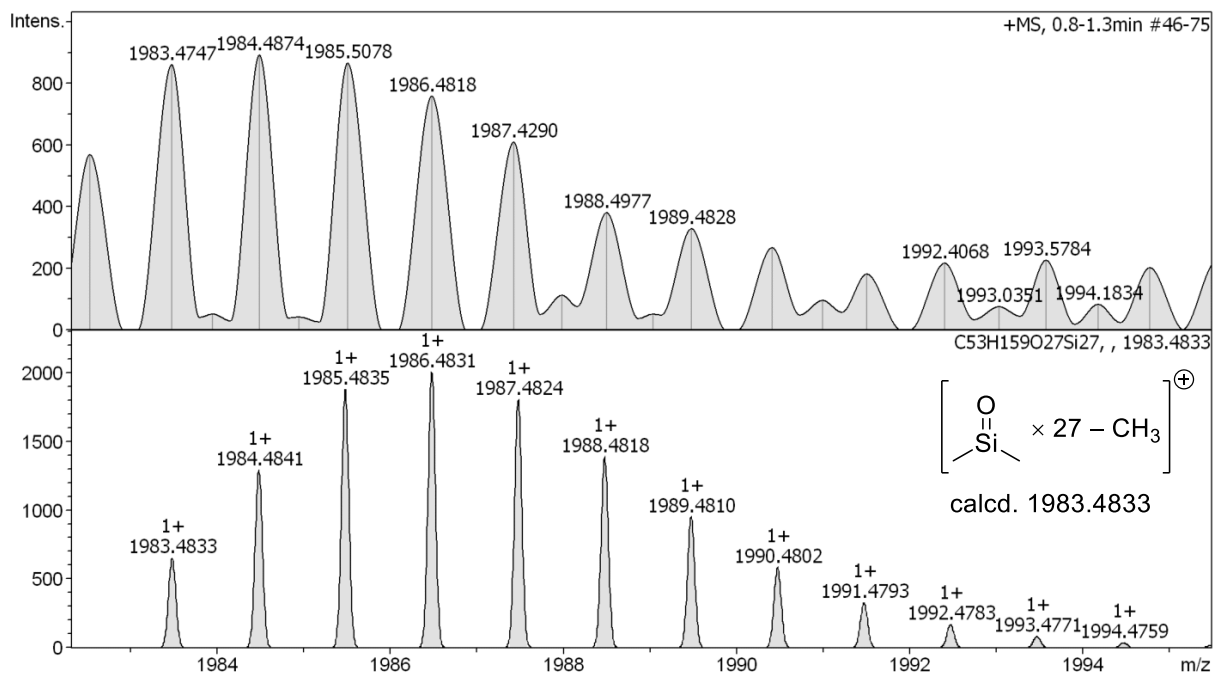

**Figure S5. Observed (upper) and predicted (lower) HRMS spectra of the cationic species of dimethylsilanone 27-mer minus one methyl group**

Figure 5 shows the HRMS spectrum around mass peak  $m/z$  1984 of the reaction mixture after completion of the reaction. The upper spectrum is the observed HRMS spectrum and the lower one is the calculated mass values of cationic species of dimethylsilanone 27-mer minus one methyl group. These two spectra are in good agreement. This result suggested the formation of polydimethylsiloxane that is longer than 27-mer of dimethylsilanone during the reaction.

## Characterization Data

### 1-chloro-2-phenyl-1,1,2,2-tetramethyldisilane (S1):

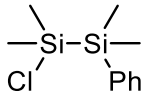 density: 0.97 g/cm<sup>3</sup>. <sup>1</sup>H NMR (C<sub>6</sub>D<sub>6</sub>): δ 7.38 (m, 2H), 7.27–7.24 (m, 3H), 0.34 (s, 6H), 0.34 (s, 6H); <sup>13</sup>C NMR (C<sub>6</sub>D<sub>6</sub>): δ 136.8, 134.1, 129.3, 128.3, 2.0, –4.7; HRMS (APCI-MS, positive): *m/z* [M–Cl]<sup>+</sup> Calcd for C<sub>10</sub>H<sub>17</sub>Si<sub>2</sub> 193.0863, Found 193.0871.

### 1-chloro-2-(4-methoxyphenyl)-1,1,2,2-tetramethyldisilane (S2):

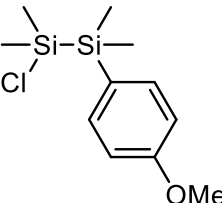 density: 1.01 g/cm<sup>3</sup>. <sup>1</sup>H NMR (C<sub>6</sub>D<sub>6</sub>): δ 7.35 (d, *J* = 8.9 Hz, 2H), 6.82 (d, *J* = 8.9 Hz, 2H), 3.28 (s, 3H), 0.36 (s, 6H), 0.34 (s, 6H); <sup>13</sup>C NMR (C<sub>6</sub>D<sub>6</sub>): δ 161.2, 135.6, 127.1, 114.3, 54.5, 2.1, –4.4; HRMS (APCI-MS, positive): *m/z* [M–Cl]<sup>+</sup> Calcd for C<sub>11</sub>H<sub>19</sub>OSi<sub>2</sub> 223.0969, Found 223.0967.

### 1-chloro-2-trimethylsiloxy-1,1,2,2-tetramethyldisilane (S3):

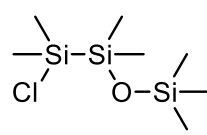 density: 0.89 g/cm<sup>3</sup>. <sup>1</sup>H NMR (C<sub>6</sub>D<sub>6</sub>): δ 0.38 (s, 6H), 0.25 (s, 6H), 0.09 (s, 9H); <sup>13</sup>C NMR (C<sub>6</sub>D<sub>6</sub>): δ 2.0, 1.9, 1.3; HRMS (APCI-MS, positive): *m/z* [M–Cl]<sup>+</sup> Calcd for C<sub>7</sub>H<sub>21</sub>OSi<sub>3</sub> 205.0896, Found 205.0895.

### 2-phenyl-1,1,2,2-tetramethyldisilan-1-ol (S4):

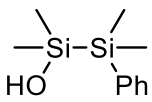 density: 0.89 g/cm<sup>3</sup>. <sup>1</sup>H NMR (C<sub>6</sub>D<sub>6</sub>): δ 7.49 (dd, *J* = 8.2, 1.4 Hz, 2H), 7.22–7.17 (m, 3H), 0.74 (s, 1H), 0.32 (s, 6H), 0.16 (s, 6H); <sup>13</sup>C NMR (C<sub>6</sub>D<sub>6</sub>): δ 139.1, 134.2, 128.8, 128.2, 1.6, –3.8; <sup>29</sup>Si NMR (C<sub>6</sub>D<sub>6</sub>): δ 12.6, –24.8; HRMS (APCI-MS, positive): *m/z* [M–OH]<sup>+</sup> Calcd for C<sub>10</sub>H<sub>17</sub>Si<sub>2</sub> 193.0863, Found 193.0869.

### 2-(4-methoxyphenyl)-1,1,2,2-tetramethyldisilan-1-ol (S5):

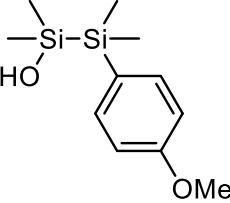 A colorless liquid (4.53 g, 18.1 mmol, 91%, density: 1.00 g/cm<sup>3</sup>). <sup>1</sup>H NMR (CDCl<sub>3</sub>): δ 7.41 (d, *J* = 8.9 Hz, 2H), 6.92 (d, *J* = 8.9 Hz, 2H), 3.81 (s, 3H), 0.35 (s, 6H), 0.24 (s, 6H); <sup>13</sup>C NMR (CDCl<sub>3</sub>): δ 160.1, 135.1, 129.1, 113.7, 54.9, 1.4, –3.9; <sup>29</sup>Si NMR (CDCl<sub>3</sub>): δ 13.9, –25.4; HRMS (APCI-MS, positive): *m/z* [M–OH]<sup>+</sup> Calcd for C<sub>11</sub>H<sub>19</sub>OSi<sub>2</sub> 223.0969, Found 223.0970.

**Sodium (dimethylphenylsilyl)dimethylsilanolate (1-Ph):**
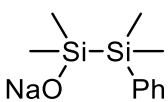

$^1\text{H NMR}$  ( $\text{C}_6\text{D}_6$ ):  $\delta$  7.51 (d,  $J = 7.5$  Hz, 2H), 7.24 (dd,  $J = 7.5, 7.5$  Hz, 2H), 7.17 (dd,  $J = 7.5, 7.5$  Hz, 1H), 0.34 (s, 6H), 0.16 (s, 6H);  $^{13}\text{C NMR}$  ( $\text{C}_6\text{D}_6$ ):  $\delta$  143.4, 133.5, 128.9, 128.7, 5.8,  $-3.1$ ;  $^{29}\text{Si NMR}$  ( $\text{C}_6\text{D}_6$ ):  $\delta$   $-12.4, -26.4$ ; HRMS (ESI-MS, negative):  $m/z$   $[\text{M}-\text{Na}]^-$  Calcd for  $\text{C}_{10}\text{H}_{17}\text{OSi}_2$  209.0823; Found 209.0828.

**Sodium (dimethyl(4-methoxyphenyl)silyl)dimethylsilanolate (1-Ans):**
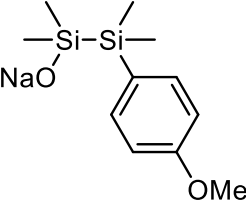

$^1\text{H NMR}$  ( $\text{C}_6\text{D}_6$ ):  $\delta$  7.49 (d,  $J = 8.2$  Hz, 2H), 6.94 (d,  $J = 8.2$  Hz, 2H), 3.38 (s, 3H), 0.39 (s, 6H), 0.19 (s, 6H);  $^{13}\text{C NMR}$  ( $\text{C}_6\text{D}_6$ ):  $\delta$  160.6, 134.9, 132.8, 114.9, 54.5, 5.7,  $-2.8$ ;  $^{29}\text{Si NMR}$  ( $\text{C}_6\text{D}_6$ ):  $\delta$   $-12.0, -26.9$ ; HRMS (ESI-MS, negative):  $m/z$   $[\text{M}-\text{Na}]^-$  Calcd for  $\text{C}_{11}\text{H}_{19}\text{OSi}_2$  239.0929; Found 239.0922.

**Sodium (dimethyl(trimethyl)siloxy)silyl)dimethylsilanolate (1-OSiMe<sub>3</sub>):**
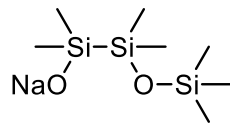

$^1\text{H NMR}$  ( $\text{C}_6\text{D}_6$ ):  $\delta$  0.25 (s, 6H), 0.21 (s, 6H), 0.13 (s, 9H);  $^{13}\text{C NMR}$  ( $\text{C}_6\text{D}_6$ ):  $\delta$  5.9, 3.1, 2.4;  $^{29}\text{Si NMR}$  ( $\text{C}_6\text{D}_6$ ):  $\delta$  13.9, 9.3,  $-15.4$ ; HRMS (ESI-MS, negative):  $m/z$   $[\text{M}-\text{Na}]^-$  Calcd for  $\text{C}_7\text{H}_{21}\text{O}_2\text{Si}_3$  221.0855; Found 221.0845.

**(E)-(1,2-diphenylvinyl)trimethylsilane (3a):**
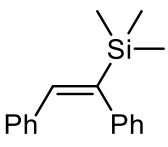

$R_f = 0.66$  (hexane only).  $^1\text{H NMR}$  ( $\text{CDCl}_3$ ):  $\delta$  7.30 (dd,  $J = 7.6, 7.6$  Hz, 2H), 7.21 (dd,  $J = 7.6, 7.6$  Hz, 1H), 7.10–7.07 (m, 3H), 6.99 (d,  $J = 7.6$  Hz, 2H), 6.96 (dd,  $J = 7.6, 2.1$  Hz, 2H), 6.80 (s, 1H), 0.14 (s, 9H);  $^{13}\text{C NMR}$  ( $\text{CDCl}_3$ ):  $\delta$  147.1, 142.7, 137.3, 137.3, 129.4, 128.6, 127.9, 127.4, 127.0, 125.6,  $-1.7$ ; HRMS (APCI-MS, positive):  $m/z$   $[\text{M}]^+$  Calcd for  $\text{C}_{17}\text{H}_{20}\text{Si}$  252.1329, Found 252.1324. All the resonances in  $^1\text{H NMR}$  spectrum were consistent with the reported values.<sup>26</sup>  $^1\text{H}$  and  $^{13}\text{C NMR}$  spectra are provided below.

**(E)-(1,2-di(4-trifluoromethylphenyl)vinyl)trimethylsilane (3b):**
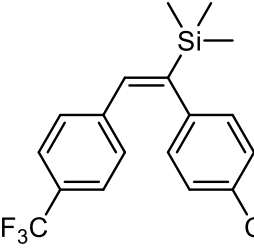

A white solid (174 mg, 0.449 mmol, 90%) from **2b** (157 mg, 0.501 mmol). Purification was done by GPC (eluent:  $\text{CHCl}_3$ ). mp: 72.4–76.0 °C;  $R_f = 0.61$  (hexane only);  $^1\text{H NMR}$  ( $\text{CDCl}_3$ ):  $\delta$  7.58 (d,  $J = 8.2$  Hz, 2H), 7.36 (d,  $J = 8.2$  Hz, 2H), 7.09 (d,  $J = 8.2$  Hz, 2H), 7.02 (d,  $J = 8.2$  Hz, 2H), 6.87 (s, 1H), 0.16 (s, 9H);  $^{13}\text{C NMR}$  ( $\text{CDCl}_3$ ):  $\delta$  148.9, 146.3, 140.2, 136.7, 129.5, 129.0 (q,  $J = 31.9$  Hz), 128.3 (q,  $J = 31.9$  Hz), 127.6, 125.7

(q,  $J = 2.9$  Hz), 125.0 (q,  $J = 2.9$  Hz), 124.3 (q,  $J = 271.7$  Hz), 124.0 (q,  $J = 271.7$  Hz),  $-1.8$ ;  $^{19}\text{F}$  NMR ( $\text{CDCl}_3$ ):  $-62.7$ ,  $-63.0$ ; HRMS (APCI-MS, positive):  $m/z$   $[\text{M}]^+$  Calcd for  $\text{C}_{19}\text{H}_{18}\text{F}_6\text{Si}$  388.1076, Found 388.1077.

**(E)-(1,2-di(4-cyanophenyl)vinyl)trimethylsilane (3c):**

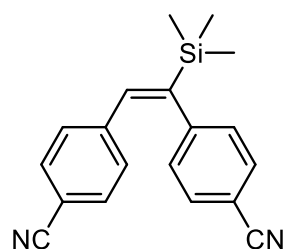

A white solid (115 mg, 0.380 mmol, 76%) from **2c** (113 mg, 0.497 mmol). Purification was done by column chromatography on silica gel (hexane/EtOAc = 10/1) and GPC (eluent:  $\text{CHCl}_3$ ). mp:  $132.8$ – $135.3$  °C;  $R_f = 0.25$  (hexane/EtOAc = 10/1);  $^1\text{H}$  NMR ( $\text{CDCl}_3$ ):  $\delta$  7.61 (d,  $J = 8.2$  Hz, 2H), 7.40 (d,  $J = 8.2$  Hz, 2H), 7.07 (d,  $J = 8.2$  Hz, 2H), 6.99 (d,  $J = 8.2$  Hz, 2H), 6.86 (s, 1H), 0.16 (s, 9H);  $^{13}\text{C}$  NMR ( $\text{CDCl}_3$ )  $\delta$  149.9, 147.3, 140.8, 136.4, 132.5, 131.7, 129.6, 127.8, 118.7, 118.4, 110.6, 109.9,  $-2.0$ ; HRMS (APCI-MS, positive):  $m/z$   $[\text{M}+\text{H}]^+$  Calcd for  $\text{C}_{19}\text{H}_{19}\text{N}_2\text{Si}$  303.1312, Found 303.1318.

**(E)-(1,2-di(4-tert-butoxycarbonylphenyl)vinyl)trimethylsilane (3d):**

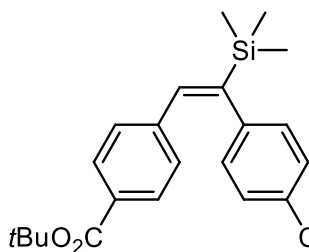

A pale yellow oil (225 mg, 0.497 mmol, 99%) from **2d** (190 mg, 0.500 mmol). Purification was done by GPC (eluent:  $\text{CHCl}_3$ ).  $R_f = 0.22$  (hexane/EtOAc = 20/1);  $^1\text{H}$  NMR ( $\text{CDCl}_3$ ):  $\delta$  7.93 (d,  $J = 8.2$  Hz, 2H), 7.71 (d,  $J = 8.2$  Hz, 2H), 7.02 (d,  $J = 8.2$  Hz, 2H), 6.97 (d,  $J = 8.2$  Hz, 2H), 6.86 (s, 1H), 1.61 (s, 9H), 1.54 (s, 9H), 0.14 (s, 9H);  $^{13}\text{C}$  NMR ( $\text{CDCl}_3$ ):  $\delta$  165.6, 165.3, 149.0, 147.2, 140.9, 136.8, 130.3, 129.8, 129.5, 129.0, 127.1, 80.70, 80.65, 28.1, 28.0,  $-1.8$  (one overlapped peak); HRMS (APCI-MS, positive):  $m/z$   $[\text{M}]^+$  Calcd for  $\text{C}_{27}\text{H}_{36}\text{O}_4\text{Si}$  452.2377, Found 452.2365.

**(E)-(1,2-di(4-ethoxycarbonylphenyl)vinyl)trimethylsilane (3e):**

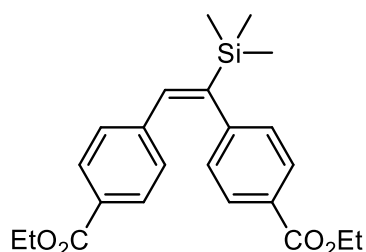

A colorless oil (113 mg, 0.284 mmol, 57%) from **2e** (161 mg, 0.500 mmol). Purification was done by column chromatography on silica gel (hexane/EtOAc = 20/1, then hexane/ $\text{CH}_2\text{Cl}_2 = 1/1$ ), followed by GPC (eluent:  $\text{CHCl}_3$ ).  $R_f = 0.47$  (hexane/EtOAc = 10/1);  $^1\text{H}$  NMR ( $\text{CDCl}_3$ ):  $\delta$  7.99 (d,  $J = 8.2$  Hz, 2H), 7.76 (d,  $J = 8.2$  Hz, 2H), 7.05 (d,  $J = 8.2$  Hz, 2H), 6.99 (d,  $J = 8.2$  Hz, 2H), 6.87 (s, 1H), 4.38 (q,  $J = 7.2$  Hz, 2H), 4.31 (q,  $J = 7.2$  Hz, 2H), 1.40 (t,  $J = 7.2$  Hz, 3H), 1.34 (t,  $J = 7.2$  Hz, 3H), 0.15 (s, 9H);  $^{13}\text{C}$  NMR ( $\text{CDCl}_3$ ):  $\delta$  166.5, 166.1, 149.3, 147.7, 141.2, 136.8, 130.0, 129.14, 129.12, 128.8, 128.0, 127.2, 60.8, 60.7, 14.3, 14.2,  $-1.8$ ; HRMS (APCI-MS, positive):  $m/z$   $[\text{M}]^+$  Calcd for  $\text{C}_{23}\text{H}_{28}\text{O}_4\text{Si}$  396.1751, Found 396.1757.

**(E)-(1,2-di(4-fluorophenyl)vinyl)trimethylsilane (3f):**

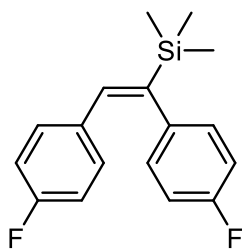

A white solid (110 mg, 0.380 mmol, 76%) from **2f** (108 mg, 0.502 mmol). Purification was done by column chromatography on silica gel (hexane only) and GPC (eluent: CHCl<sub>3</sub>). mp: 92.6–93.9 °C; *R<sub>f</sub>* = 0.67 (hexane only); <sup>1</sup>H NMR (CDCl<sub>3</sub>): δ 7.01 (dd, *J* = 8.9, 8.9 Hz, 2H), 6.94–6.90 (m, 4H), 6.79 (dd, *J* = 8.9, 8.9 Hz, 2H), 6.77 (s, 1H), 0.13 (s, 9H); <sup>13</sup>C NMR (CDCl<sub>3</sub>): δ 161.6 (d, *J* = 249.0 Hz), 161.3 (d, *J* = 244.6 Hz), 145.7, 138.1 (d, *J* = 2.9 Hz), 136.7, 133.3 (d, *J* = 4.4 Hz), 131.0 (d, *J* = 8.6 Hz), 128.9 (d, *J* = 8.8 Hz), 115.7 (d, *J* = 20.2 Hz), 114.8 (d, *J* = 21.7 Hz), –1.8; <sup>19</sup>F NMR (CDCl<sub>3</sub>): –114.7, –117.3; HRMS (APCI-MS, positive): *m/z* [M]<sup>+</sup> Calcd for C<sub>17</sub>H<sub>18</sub>F<sub>2</sub>Si 288.1140, Found 288.1136.

**(E)-(1,2-di(4-chlorophenyl)vinyl)trimethylsilane (3g):**

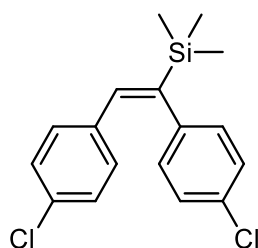

A yellow solid (137 mg, 0.426 mmol, 85%) from **2g** (124 mg, 0.501 mmol). Purification was done by GPC (eluent: CHCl<sub>3</sub>). mp: 94.6–96.7 °C; *R<sub>f</sub>* = 0.61 (hexane only); <sup>1</sup>H NMR (CDCl<sub>3</sub>): δ 7.28 (d, *J* = 8.2 Hz, 2H), 7.08 (d, *J* = 8.2 Hz, 2H), 6.90 (d, *J* = 8.2 Hz, 2H), 6.88 (d, *J* = 8.2 Hz, 2H), 6.76 (s, 1H), 0.13 (s, 9H); <sup>13</sup>C NMR (CDCl<sub>3</sub>): δ 146.7, 140.8, 136.6, 135.4, 132.9, 131.7, 130.6, 129.0, 128.7, 128.2, –1.8; HRMS (APCI-MS, positive): *m/z* [M]<sup>+</sup> Calcd for C<sub>17</sub>H<sub>18</sub><sup>35</sup>Cl<sub>2</sub>Si 320.0549, Found 320.0554.

**(E)-(1,2-di(4-methylphenyl)vinyl)trimethylsilane (3h):**

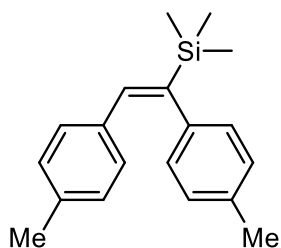

A white solid (131 mg, 0.467 mmol, 93%) from **2h** (103 mg, 0.500 mmol). Purification was done by column chromatography on silica gel (hexane only). mp: 78.3–83.7 °C; *R<sub>f</sub>* = 0.54 (hexane only); <sup>1</sup>H NMR (CDCl<sub>3</sub>): δ 7.11 (d, *J* = 7.6 Hz, 2H), 6.90 (d, *J* = 8.2 Hz, 2H), 6.87 (d, *J* = 7.6 Hz, 2H), 6.86 (d, *J* = 8.2 Hz, 2H), 6.74 (s, 1H), 2.35 (s, 3H), 2.23 (s, 3H), 0.11 (s, 9H); <sup>13</sup>C NMR (CDCl<sub>3</sub>): δ 145.9, 139.7, 137.1, 136.7, 134.8, 134.7, 129.4, 129.3, 128.6, 127.3, 21.2, 21.1, –1.6; HRMS (APCI-MS, positive): *m/z* [M]<sup>+</sup> Calcd for C<sub>19</sub>H<sub>24</sub>Si 280.1642, Found 280.1649.



**(E)-(1,2-di(2-methylphenyl)vinyl)trimethylsilane (3i):**

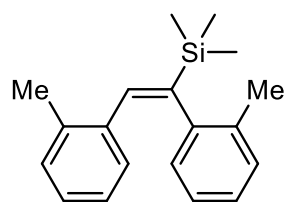

A colorless oil (113 mg, 0.402 mmol, 81%) from **2i** (103 mg, 0.499 mmol). 3.0 equiv **1-Me** and 3.0 equiv *t*BuOH were used. Purification was done by GPC (eluent: CHCl<sub>3</sub>). R<sub>f</sub> = 0.39 (hexane only); <sup>1</sup>H NMR (CDCl<sub>3</sub>): δ 7.12 (ddd, *J* = 7.6, 7.6, 2.1 Hz, 1H), 7.08 (d, *J* = 7.6 Hz, 1H), 7.05 (ddd, *J* = 7.6, 7.6, 1.4 Hz, 3H), 7.037 (s, 1H), 7.036 (d, *J* = 7.6 Hz, 1H), 7.00–6.96 (m, 2H), 6.76 (dd, *J* = 7.6, 7.6 Hz, 1H), 6.70 (d, *J* = 7.6 Hz, 1H), 2.37 (s, 3H), 1.91 (s, 3H), 0.15 (s, 9H); <sup>13</sup>C NMR (CDCl<sub>3</sub>): δ 145.8, 141.2, 136.9, 136.7, 135.8, 134.0, 130.1, 129.8, 128.3, 128.1, 126.9, 125.5, 125.3, 125.2, 19.8, 19.7, -1.3; HRMS (APCI-MS, positive): *m/z* [M]<sup>+</sup> Calcd for C<sub>19</sub>H<sub>24</sub>Si 280.1642, Found 280.1635.

**(E)-(1,2-di(3-pyridinyl)vinyl)trimethylsilane (3k):**

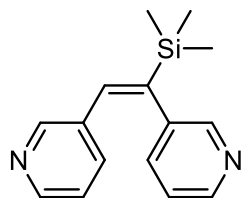

A colorless oil (105 mg, 0.411 mmol, 82%) from **2k** (90.3 mg, 0.501 mmol). Purification was done by column chromatography on silica gel (hexane/EtOAc = 8/1 to 0/1). R<sub>f</sub> = 0.22 (hexane/EtOAc = 1/1); <sup>1</sup>H NMR (CDCl<sub>3</sub>): δ 8.49 (dd, *J* = 4.8, 2.1 Hz, 1H), 8.33 (dd, *J* = 4.8, 2.1 Hz, 1H), 8.30 (d, *J* = 2.1 Hz, 1H), 8.25 (d, *J* = 2.1 Hz, 1H), 7.31 (ddd, *J* = 7.6, 2.1, 2.1 Hz, 1H), 7.25 (dd, *J* = 7.6, 4.8 Hz, 2H), 7.09 (ddd, *J* = 8.2, 2.1, 2.1 Hz, 1H), 6.99 (dd, *J* = 8.2, 4.8 Hz, 1H), 6.90 (s, 1H), 0.17 (s, 9H); <sup>13</sup>C NMR (CDCl<sub>3</sub>): δ 150.6, 148.0, 147.9, 147.3, 146.0, 137.5, 135.6, 135.5, 134.7, 132.3, 123.4, 122.7, -2.0; HRMS (APCI-MS, positive): *m/z* [M+H]<sup>+</sup> Calcd for C<sub>15</sub>H<sub>19</sub>N<sub>2</sub>Si 255.1312, Found 255.1323.

**(E)-(1,2-di(2-thiophenyl)vinyl)trimethylsilane (3l):**

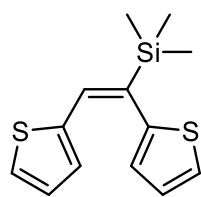

A white solid (107 mg, 0.406 mmol, 81%) from **2l** (95.5 mg, 0.502 mmol). Purification was done by GPC (eluent: CHCl<sub>3</sub>). mp: 70.7–72.5 °C; R<sub>f</sub> = 0.45 (hexane only); <sup>1</sup>H NMR (CDCl<sub>3</sub>): δ 7.37 (dd, *J* = 4.8, 1.4 Hz, 1H), 7.12 (dd, *J* = 4.8, 1.4 Hz, 1H), 7.11 (s, 1H), 7.09 (dd, *J* = 5.5, 3.4 Hz, 1H), 6.97 (dd, *J* = 3.4, 1.4 Hz, 1H), 6.88 (dd, *J* = 5.5, 3.4 Hz, 1H), 6.68 (d, *J* = 3.4 Hz, 1H), 0.16 (s, 9H); <sup>13</sup>C NMR (CDCl<sub>3</sub>): δ 142.0, 140.5, 136.4, 134.4, 129.6, 127.74, 127.68, 125.8, 125.4, 124.6, -2.0; HRMS (APCI-MS, positive): *m/z* [M]<sup>+</sup> Calcd for C<sub>13</sub>H<sub>16</sub>S<sub>2</sub>Si 264.0457, Found 264.0459.

**(E)-(1,2-diphenylvinyl-2-d)trimethylsilane (3m):**

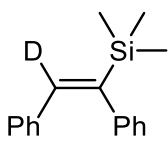 A colorless oil (73.4 mg, 0.290 mmol, 58%) from **2a** (88.6 mg, 0.497 mmol). Reaction time was 20 h. CH<sub>3</sub>OD was used instead of *t*BuOH. Purification was done by GPC (eluent: CHCl<sub>3</sub>) and column chromatography on silica gel (hexane only). *R<sub>f</sub>* = 0.56 (hexane only); <sup>1</sup>H NMR (CDCl<sub>3</sub>): δ 7.31 (t, *J* = 7.5 Hz, 2H), 7.23–7.20 (m, 1H), 7.12–7.07 (m, 3H), 6.99 (d, *J* = 7.5 Hz, 2H), 6.96–6.94 (m, 2H), 0.13 (s, 9H); <sup>13</sup>C NMR (CDCl<sub>3</sub>): δ 146.9, 142.7, 137.2, 136.8 (t, *J* = 23.2 Hz), 129.4, 128.6, 127.9, 127.3, 127.0, 125.6, –1.7; HRMS (APCI-MS, positive): *m/z* [M]<sup>+</sup> Calcd for C<sub>17</sub>H<sub>20</sub>DSi 254.1470, Found 254.1476.

**(E)-(1-phenylprop-1-en-2-yl)trimethylsilane** and **(E)-(1-phenylprop-1-en-1-yl)trimethylsilane (3n):**

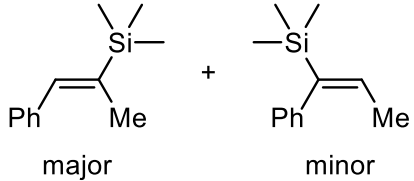 P(OPh)<sub>3</sub> as a ligand: A colorless oil (67.8 mg, 0.356 mmol, 70%, major:minor = 3.4:1 as an inseparable mixture) from **2n** (58.2 mg, 0.501 mmol). Purification was done by preparative TLC with an eluent (hexane only). *R<sub>f</sub>* = 0.59 (hexane only); <sup>1</sup>H NMR (CDCl<sub>3</sub>): δ 7.34 (major, dd, *J* = 7.6, 7.6 Hz, 2H), 7.31–7.29 (major, d, *J* = 7.6 Hz, 2H + minor, m, 2H), 7.21 (major, dd, *J* = 7.6, 7.6 Hz, 1H), 7.18 (minor, dd, *J* = 7.6, 7.6 Hz, 1H), 6.93 (minor, d, *J* = 7.6 Hz, 2H), 6.72 (s, 1H), 6.09 (minor, q, *J* = 6.6 Hz, 1H), 1.95 (major, s, 3H), 1.55 (minor, d, *J* = 6.6 Hz, 3H), 0.15 (major, s, 9H), 0.04 (minor, s, 9H); <sup>13</sup>C NMR (CDCl<sub>3</sub>): δ 145.9, 142.4, 140.3 (major), 138.4 (major), 136.8 (major), 135.4, 129.0, 128.0, 127.8 (major), 126.4, 125.2 (major), 16.3 (major), 15.9, –1.6 (major), –2.1 (overlapped one peak); PCy<sub>3</sub> as a ligand: A colorless oil (54.5 mg, 0.286 mmol, 57%, major:minor = 25:1 as an inseparable mixture) from **2n** (58.2 mg, 0.501 mmol). Concentration of **2n**: 0.5 M. 5 mol% [CuCl(PCy<sub>3</sub>)<sub>2</sub>] (10 mol% Cu), 3.0 equiv **1-Me**, and 3.0 equiv *t*BuOH were used. Purification was done by preparative TLC (hexane only) and GPC (eluent: CHCl<sub>3</sub>). All the resonances in <sup>1</sup>H and <sup>13</sup>C NMR spectrum were consistent with the ones with P(OPh)<sub>3</sub> as a ligand. HRMS (APCI-MS, positive): *m/z* [M–Me]<sup>+</sup> Calcd for C<sub>11</sub>H<sub>15</sub>Si 175.0938, Found 175.0935.

**(E)-(3,3-dimethyl-1-phenylbut-1-en-1-yl)trimethylsilane (3o):**

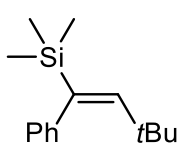 A white solid (46.2 mg, 0.199 mmol, 39%) from **2o** (79.9 mg, 0.505 mmol). The reaction temperature was 80 °C. Concentration of **2o**: 0.5 M. 10 mol% CuCl[P(OPh)<sub>3</sub>] was used. Purification was done by preparative TLC with an eluent (hexane only) and GPC (eluent: CHCl<sub>3</sub>). mp: 40.6–41.9 °C; *R<sub>f</sub>* = 0.79 (hexane only); <sup>1</sup>H NMR (CDCl<sub>3</sub>): δ 7.22 (dd, *J* = 7.6, 7.6 Hz, 2H), 7.13 (dd, *J* = 7.6, 7.6 Hz, 1H), 6.92 (d, *J* = 7.6

Hz, 2H), 5.83 (s, 1H), 0.86 (s, 9H), -0.01 (s, 9H);  $^{13}\text{C}$  NMR ( $\text{CDCl}_3$ ):  $\delta$  149.0, 142.7, 141.8, 128.2, 127.3, 124.8, 35.9, 31.2, -1.8; HRMS (APCI-MS, positive):  $m/z$   $[\text{M}]^+$  Calcd for  $\text{C}_{15}\text{H}_{24}\text{Si}$  232.1642, Found 232.1649. The stereochemistry of the product was determined by analysis of NOE.

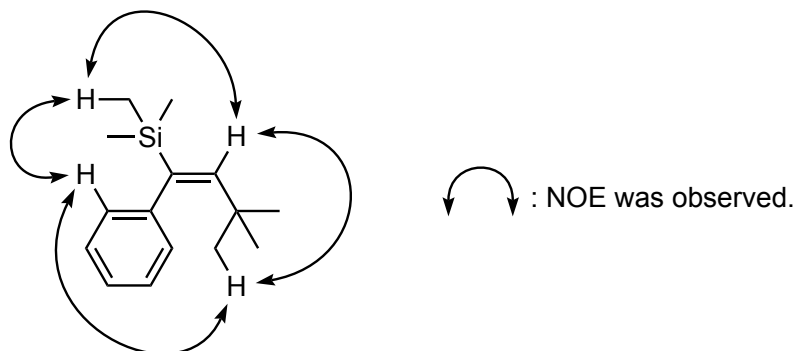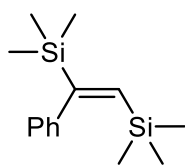

**(*E*)-(1-phenylethene-1,2-diyl)bis(trimethylsilane) (3p):**

A colorless oil (114 mg, 0.459 mmol, 93%) from **2p** (86.3 mg, 0.495 mmol). Concentration of **2p**: 0.5 M. 10 mol%  $\text{CuCl}[\text{P}(\text{OPh})_3]$  was used. Purification was done by preparative TLC with an eluent (hexane only).  $R_f = 0.72$  (hexane only). All the resonances in  $^1\text{H}$  and  $^{13}\text{C}$  NMR spectrum ( $\text{CD}_2\text{Cl}_2$ ) were consistent with the reported values.<sup>27</sup>  $^1\text{H}$  and  $^{13}\text{C}$  NMR spectra are provided below.

**(*E*)-(4-(benzyloxy)but-2-en-2-yl)trimethylsilane and (*E*)-(1-(benzyloxy)but-2-en-2-yl)trimethylsilane (3q):**

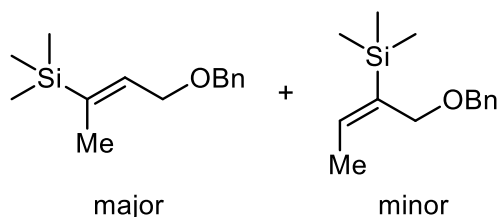

A colorless oil (93.7 mg, 0.400 mmol, 80%, major:minor = 7.4:1 as an inseparable mixture) from **2q** (80.1 mg, 0.500 mmol). Purification was done by column chromatography on silica gel (hexane/EtOAc = 1/0 to 40/1) and preparative TLC with an eluent (hexane/EtOAc = 20/1).  $R_f = 0.43$  (hexane/EtOAc = 20/1);  $^1\text{H}$  NMR ( $\text{CDCl}_3$ ):  $\delta$  7.37–7.34 (major, m, 4H + minor, m, 4 H), 7.30–7.26 (major, m, 1H + minor, m, 1 H), 6.01 (minor, q,  $J = 6.6$  Hz, 1H), 5.90–5.88 (major, m, 1H), 4.53 (major, s, 2H), 4.48 (minor, s, 2H), 4.18 (minor, s, 2H), 4.13 (major, d,  $J = 5.5$  Hz, 2H), 1.72 (minor, d,  $J = 6.2$  Hz, 3H), 1.67 (major, s, 3H), 0.09 (minor, s, 9H), 0.06 (major, s, 9H);  $^{13}\text{C}$  NMR ( $\text{CDCl}_3$ ):  $\delta$  140.0 (major), 139.2, 138.6, 138.3 (major), 137.2, 135.1 (major), 128.3 (major), 128.2, 127.8 (major), 127.7, 127.6 (major), 127.4, 72.5 (major), 72.4, 68.2, 67.0 (major), 14.8 (major), -1.1, -2.3 (major) (overlapped one peak); HRMS (APCI-MS, positive):  $m/z$   $[\text{M}+\text{H}]^+$  Calcd for  $\text{C}_{14}\text{H}_{23}\text{OSi}$  235.1513, Found 235.1521. The stereochemistry of the products was determined by analysis of NOE.

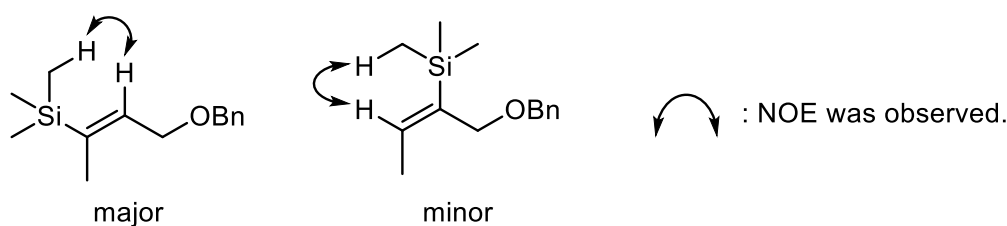

**(E)-5-(benzyloxy)pent-2-en-2-yltrimethylsilane and (E)-5-(benzyloxy)pent-2-en-3-yltrimethylsilane (3r):**

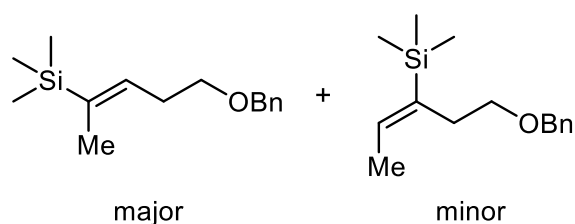

A colorless oil (83.9 mg, 0.338 mmol, 68%, major:minor = 3.1:1 as an inseparable mixture) from **2r** (87.1 mg, 0.500 mmol). Purification was done by column chromatography on silica gel (hexane/DCM = 10/1 to 2/1).  $R_f = 0.28$

(hexane/DCM = 2/1);  $^1\text{H NMR}$  ( $\text{CDCl}_3$ ):  $\delta$  7.36–7.33 (major, d,  $J = 4.8$  Hz, 4H + minor, m, 4H), 7.30–7.26 (major, m, 1H + minor, m, 1H), 5.93 (minor, q,  $J = 6.6$  Hz, 1H), 5.72 (major, td,  $J = 6.5, 1.6$  Hz, 1H), 4.53 (major, s, 2H), 4.52 (minor, s, 2H), 3.50 (major, t,  $J = 7.2$  Hz, 2H), 3.38–3.35 (minor, m, 2H), 2.51 (minor, t,  $J = 8.2$  Hz, 2H), 2.43 (major, q,  $J = 6.9$  Hz, 2H), 1.70 (minor, d,  $J = 6.9$  Hz, 3H), 1.68 (major, s, 3H), 0.04 (major, s, 9H), 0.03 (minor, s, 9H);  $^{13}\text{C NMR}$  ( $\text{CDCl}_3$ ):  $\delta$  138.51 (major), 138.46, 138.3 (major), 137.3, 136.6, 134.7 (major), 128.3 (major), 127.6 (major), 127.5 (major), 72.8 (major), 72.7, 69.5 (major), 69.3, 29.5, 29.0 (major), 14.5 (major), 14.4, -1.5, -2.2 (major) (overlapped three peaks); HRMS (APCI-MS, positive):  $m/z$   $[\text{M}-\text{Me}]^+$  Calcd for  $\text{C}_{14}\text{H}_{21}\text{OSi}$  233.1356, Found 233.1358. The stereochemistry of the products was determined by analysis of NOE.

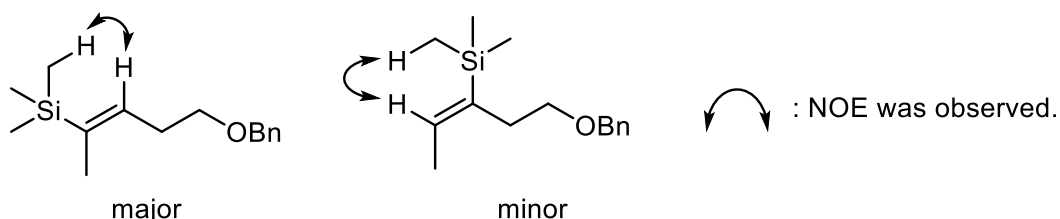

**1,3-diphenyl-3-(trimethylsilyl)-1-propanone (3s):**

A colorless oil (92.2 mg, 0.326 mmol, 66%) from **2s** (104 mg, 0.497 mmol). Reaction time was 12 h. Purification was done by column chromatography on silica gel (hexane/ $\text{CH}_2\text{Cl}_2 = 1/1$ ) and GPC (eluent:  $\text{CHCl}_3$ ).  $R_f = 0.17$  (hexane/ $\text{CH}_2\text{Cl}_2 = 1/1$ ). All the resonances in  $^1\text{H NMR}$  and  $^{13}\text{C NMR}$  spectrum ( $\text{CDCl}_3$ ) were consistent with the reported values.<sup>28</sup>  $^1\text{H}$  and  $^{13}\text{C NMR}$  spectra are provided below.

**4-(2,6,6-trimethylcyclohex-1-en-1-yl)-4-(trimethylsilyl)butan-2-one (3t):**

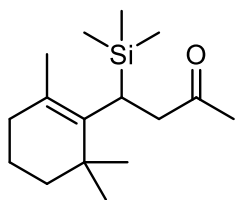

A colorless oil (118 mg, 0.443 mmol, 88%) from **2t** (96.3 mg, 0.501 mmol). Reaction time was 12 h. Purification was done by column chromatography on silica gel (hexane/CH<sub>2</sub>Cl<sub>2</sub> = 3/1).  $R_f$  = 0.29 (hexane/CH<sub>2</sub>Cl<sub>2</sub> = 3/1); <sup>1</sup>H NMR (CDCl<sub>3</sub>): δ 3.05 (dd,  $J$  = 19.2, 11.0 Hz, 1H), 2.46 (dd,  $J$  = 19.2, 3.1 Hz, 1H), 2.27 (dd,  $J$  = 11.0, 3.1 Hz, 1H), 2.11 (s, 3H), 1.95–1.84 (m, 2H), 1.55–1.51 (m, 2H), 1.49 (s, 3H), 1.43–1.37 (m, 2H), 0.97 (s, 3H), 0.92 (s, 3H), 0.03 (s, 9H); <sup>13</sup>C NMR (CDCl<sub>3</sub>): δ 208.5, 140.5, 126.3, 48.2, 39.8, 36.0, 33.1, 29.7, 28.5, 27.6, 22.9, 21.6, 19.5, –0.3; HRMS (APCI-MS, positive):  $m/z$  [M+H]<sup>+</sup> Calcd for C<sub>16</sub>H<sub>30</sub>OSi 267.2139, Found 267.2140.

### [2-(trimethylsilyl)ethylidene]cyclohexane (**3u**):

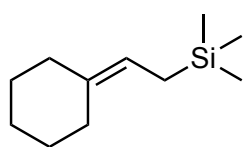

A colorless oil (65.7 mg, 0.360 mmol, 73%) from **2u** (53.4 mg, 0.494 mmol). Purification was done by column chromatography on silica gel (hexane only) and GPC (eluent: CHCl<sub>3</sub>).  $R_f$  = 0.83 (hexane only); All the resonances in <sup>1</sup>H NMR and <sup>13</sup>C spectrum (CDCl<sub>3</sub>) were consistent with the reported values.<sup>29</sup> <sup>1</sup>H and <sup>13</sup>C NMR spectra are provided below.

### (*Z*)-(3-cyclohexylbut-2-en-1-yl)trimethylsilane (**3v**):

A colorless oil (69.1 mg, 0.328 mmol, 66%, *E*:*Z* = 1:3.1 as an inseparable mixture) from **2v** (67.5 mg, 0.495 mmol). Concentration of **2v**: 0.5 M and 10 mol% CuCl[P(OPh)<sub>3</sub>] were used. Reaction time was 12 h. Purification was done by column chromatography on silica gel (hexane only) and GPC (eluent: CHCl<sub>3</sub>).  $R_f$  = 0.85 (hexane only); <sup>1</sup>H NMR (CDCl<sub>3</sub>): δ 5.17 (*E*, t,  $J$  = 8.2 Hz, 1H), 5.06 (*Z*, t,  $J$  = 8.2 Hz, 1H), 2.32 (*Z*, m, 1H), 1.82 (*E*, m, 1H), 1.78–1.61 (m, *Z*, 4H + *E*, 4H), 1.60 (*Z*, s, 3H), 1.52 (*E*, s, 3H), 1.46–1.11 (*Z*, m, 8H + *E*, m, 8H), –0.01 (*Z*, s, 9H), –0.03 (*E*, s, 9H); <sup>13</sup>C NMR (CDCl<sub>3</sub>): δ 137.9, 137.7, 119.1, 117.9, 47.6, 39.2, 32.3, 31.0, 26.9, 26.8, 26.5, 26.3, 19.6, 18.3, 17.8, 14.2, –1.8 (overlapped one peak); HRMS (APCI-MS, positive):  $m/z$  [M–Me]<sup>+</sup> Calcd for C<sub>12</sub>H<sub>23</sub>Si 195.1564, Found 195.1566. The stereochemistry of the products was determined by analysis of NOE.

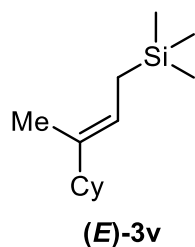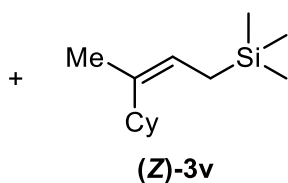

(67.5 mg, 0.495 mmol). Concentration of **2v**: 0.5 M and 10 mol% CuCl[P(OPh)<sub>3</sub>] were used. Reaction time was 12 h. Purification was done by column chromatography on silica gel (hexane only) and GPC (eluent: CHCl<sub>3</sub>).  $R_f$  = 0.85 (hexane only); <sup>1</sup>H NMR (CDCl<sub>3</sub>): δ 5.17 (*E*, t,  $J$  = 8.2 Hz, 1H), 5.06 (*Z*, t,  $J$  = 8.2 Hz, 1H), 2.32 (*Z*, m, 1H), 1.82 (*E*, m, 1H), 1.78–1.61 (m, *Z*, 4H + *E*, 4H), 1.60 (*Z*, s, 3H), 1.52 (*E*, s, 3H), 1.46–1.11 (*Z*, m, 8H + *E*, m, 8H), –0.01 (*Z*, s, 9H), –0.03 (*E*, s, 9H); <sup>13</sup>C NMR (CDCl<sub>3</sub>): δ 137.9, 137.7, 119.1, 117.9, 47.6, 39.2, 32.3, 31.0, 26.9, 26.8, 26.5, 26.3, 19.6, 18.3, 17.8, 14.2, –1.8 (overlapped one peak); HRMS (APCI-MS, positive):  $m/z$  [M–Me]<sup>+</sup> Calcd for C<sub>12</sub>H<sub>23</sub>Si 195.1564, Found 195.1566. The stereochemistry of the products was determined by analysis of NOE.

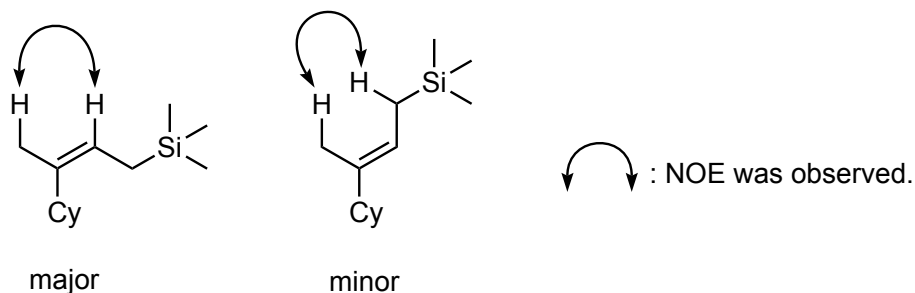

**(E)-(1,2-diphenylvinyl)benzyltrimethylsilane (3w):**

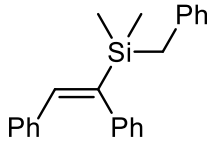
 A white solid (152 mg, 0.465 mmol, 93%) from **2a** (89.5 mg, 0.502 mmol). Purification was done by column chromatography on silica gel (hexane only) and GPC (eluent: CHCl<sub>3</sub>). mp: 81.7–83.5 °C; R<sub>f</sub> = 0.24 (hexane only); <sup>1</sup>H NMR (CDCl<sub>3</sub>): δ 7.32 (dd, *J* = 7.5, 7.5 Hz, 2H), 7.24–7.19 (m, 3H), 7.10–7.06 (m, 4H), 7.01–6.99 (m, 4H), 6.94 (dd, *J* = 6.2, 2.7 Hz, 2H), 6.78 (s, 1H), 2.20 (s, 2H), 0.09 (s, 6H); <sup>13</sup>C NMR (CDCl<sub>3</sub>): δ 145.2, 142.4, 139.7, 138.6, 137.1, 129.5, 128.7, 128.4, 128.1, 127.9, 127.5, 127.1, 125.8, 124.1, 24.9, –3.6; HRMS (APCI-MS, positive): *m/z* [M+H]<sup>+</sup> Calcd for C<sub>23</sub>H<sub>25</sub>Si 329.1720, Found 329.1716.

**(E)-(1,2-diphenylvinyl)dimethylphenylsilane (3x):**

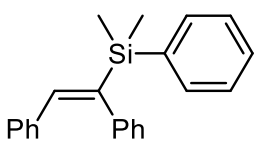
 A colorless oil (150 mg, 0.476 mmol, 95%) from **2a** (89.0 mg, 0.499 mmol). Purification was done by column chromatography on silica gel (hexane only). R<sub>f</sub> = 0.21 (hexane only); <sup>1</sup>H NMR (CDCl<sub>3</sub>): δ 7.48 (dd, *J* = 7.6, 1.4 Hz, 2H), 7.39–7.34 (m, 3H), 7.23 (dd, *J* = 7.6, 7.6 Hz, 2H), 7.17 (dd, *J* = 7.6, 7.6 Hz, 1H), 7.09–7.06 (m, 3H), 6.94 (dd, *J* = 6.6, 3.0 Hz, 2H), 6.90 (d, *J* = 7.6 Hz, 2H), 6.82 (s, 1H), 0.39 (s, 6H); <sup>13</sup>C NMR (CDCl<sub>3</sub>): δ 145.0, 142.3, 139.2, 137.6, 137.2, 134.3, 129.5, 129.1, 128.5, 127.9, 127.7, 127.6, 127.1, 125.7, –3.1; HRMS (APCI-MS, positive): *m/z* [M]<sup>+</sup> Calcd for C<sub>22</sub>H<sub>22</sub>Si 314.1485, Found 314.1490.

**(E)-(1,2-diphenylvinyl)dimethyl(4-methoxyphenyl)silane (3y):**

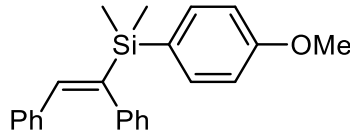
 A colorless oil (158 mg, 0.458 mmol, 92%) from **2a** (89.0 mg, 0.499 mmol). Purification was done by column chromatography on silica gel (hexane/CH<sub>2</sub>Cl<sub>2</sub> = 3/1) and preparative TLC with an eluent (hexane/CH<sub>2</sub>Cl<sub>2</sub> = 3/1), followed by GPC (eluent: CHCl<sub>3</sub>). R<sub>f</sub> = 0.42 (hexane/CH<sub>2</sub>Cl<sub>2</sub> = 3/1); <sup>1</sup>H NMR (CDCl<sub>3</sub>): δ 7.47 (d, *J* = 9.0 Hz, 2H), 7.23 (dd, *J* = 7.6, 7.6 Hz, 2H), 7.16 (dd, *J* = 7.6, 7.6 Hz, 1H), 7.09–7.05 (m, 3H), 6.95–6.88 (m, 4H), 6.92 (d, *J* = 9.0 Hz, 2H), 6.80 (s, 1H), 3.83 (s, 3H), 0.36 (s, 6H); <sup>13</sup>C NMR (CDCl<sub>3</sub>): δ 160.5, 145.4, 142.4, 138.9, 137.2, 135.7, 129.5,

128.5, 128.3, 127.8, 127.6, 127.1, 125.6, 113.5, 54.9, -3.0; HRMS (APCI-MS, positive):  $m/z$   $[M]^+$  Calcd for  $C_{23}H_{24}OSi$  344.1591, Found 344.1591.

**(E)-(1,2-diphenylvinyl)allyldimethylsilane (3z):**

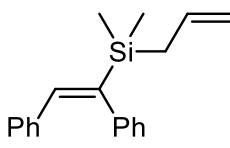 A colorless oil (122 mg, 0.437 mmol, 87%) from **2a** (89.1 mg, 0.500 mmol). Purification was done by column chromatography on silica gel (hexane only) and GPC (eluent:  $CHCl_3$ ).  $R_f$  = 0.40 (hexane only);  $^1H$  NMR ( $CDCl_3$ ):  $\delta$  7.31 (dd,  $J$  = 7.5, 7.5 Hz, 2H), 7.22 (dd,  $J$  = 7.5, 7.5 Hz, 1H), 7.10–7.08 (m, 3H), 7.00 (m, 2H), 6.96 (m, 2H), 6.81 (s, 1H), 5.77 (m, 1H), 4.89, 4.83 (m, 2H), 1.63 (d,  $J$  = 8.2 Hz, 2H), 0.15 (s, 6H);  $^{13}C$  NMR ( $CDCl_3$ ):  $\delta$  145.3, 142.5, 138.3, 137.1, 134.6, 129.5, 128.7, 127.9, 127.4, 127.1, 125.7, 113.4, 22.6, -3.8; HRMS (APCI-MS, positive):  $m/z$   $[M+H]^+$  Calcd for  $C_{19}H_{23}Si$  279.1564, Found 279.1572.

**(E)-(1,2-diphenylvinyl)dimethyltrimethylsiloxy silane (3aa):**

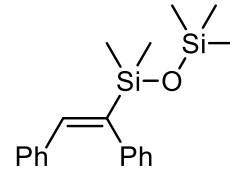 A colorless oil (129 mg, 0.393 mmol, 79%) from **2a** (89.3 mg, 0.501 mmol). Purification was done by column chromatography on silica gel (hexane only) and GPC (eluent:  $CHCl_3$ ).  $R_f$  = 0.38 (hexane only);  $^1H$  NMR ( $CDCl_3$ ):  $\delta$  7.29 (dd,  $J$  = 7.6, 7.6 Hz, 2H), 7.20 (dd,  $J$  = 7.6, 7.6 Hz, 1H), 7.11–7.09 (m, 3H), 7.03 (d,  $J$  = 6.6 Hz, 2H), 6.98 (m, 2H), 6.89 (s, 1H), 0.18 (s, 6H), 0.08 (s, 9H);  $^{13}C$  NMR ( $CDCl_3$ ):  $\delta$  146.4, 142.0, 137.7, 137.2, 129.6, 128.5, 127.9, 127.7, 127.1, 125.7, 1.9, 0.2; HRMS (APCI-MS, positive):  $m/z$   $[M+H]^+$  Calcd for  $C_{19}H_{26}OSi_2$  326.1517, Found 326.1523.

## References

- (1) S. Byun, S. Park, Y. Choi, J. Y. Ryu, J. Lee, J.-H. Choi and S. Hong, *ACS Catal.*, 2020, **10**, 10592–10601.
- (2) F. Hu and X. Lei, *ChemCatChem*, 2015, **7**, 1539–1542.
- (3) S. Daly, M. F. Haddow, A. G. Orpen, G. T. A. Rolls, D. F. Wass and R. L. Wingad, *Organometallics*, 2008, **27**, 3196–3202.
- (4) J. Chun, L. H. See, I. G. Jung, S. W. Lee, H. J. Kim and S. U. Son, *Organometallics*, 2010, **29**, 1518–1521.
- (5) H. Yamagishi, H. Saito, J. Shimokawa and H. Yorimitsu, *ACS Catal.*, 2021, **11**, 10095–10103
- (6) H. Yamagishi, J. Shimokawa and H. Yorimitsu, *Synlett*, 2019, **30**, 1551–1554.
- (7) L. E. Sattler and G. Hilt, *Chem. Eur. J.*, 2021, **27**, 605–608.
- (8) T. Fujihara, T. Xu, K. Semba, J. Terao and Y. Tsuji, *Angew. Chem. Int. Ed.*, 2010, **50**, 523–527.
- (9) S. Rakshit, F. W. Patureau and F. Glorius, *J. Am. Chem. Soc.*, 2010, **132**, 9585–9587.
- (10) M. J. Mio, L. C. Kopel, J. B. Braun, T. L. Gadzikwa, K. L. Hull, R. G. Brisbois, C. J. Markworth and P. A. Grieco, *Org. Lett.*, 2002, **4**, 3199–3202.
- (11) W. Li, S. Yu, J. Li and Y. Zhao, *Angew. Chem. Int. Ed.*, 2020, **59**, 14404–14408.
- (12) F. Takahashi, K. Nogi, T. Sasamori and H. Yorimitsu, *Org. Lett.*, 2019, **21**, 4739–4744.
- (13) K. Semba, T. Fujihara, J. Terao and Y. Tsuji, *Chem. Eur. J.* 2012, **18**, 4179–4184.
- (14) F. Alonso, I. Osante and M. Yus, *Tetrahedron* 2007, **63**, 93–102.
- (15) Y. Tani, T. Fujihara, J. Terao and Y. Tsuji, *J. Am. Chem. Soc.*, 2014, **136**, 17706–17709.
- (16) T. N. Brenova, V. V. Semenov and G. A. Razunaev, *Zh. Obshch. Khim.*, 1980, **51**, 2010–2016.
- (17) E. Yamamoto, R. Shishido, T. Seki and H. Ito, *Organometallics*, 2017, **36**, 3019–3022.
- (18) K. Kim and K. D. Jordan, *J. Phys. Chem.*, 1994, **98**, 10089–10094.
- (19) S. Grimme, S. Ehrlich and L. Goerigk, *J. Comp. Chem.*, 2011, **32**, 1456–1465.
- (20) F. Weigend and R. Ahlrichs, *Phys. Chem. Chem. Phys.*, 2005, **7**, 3297–3305.
- (21) (a) S. Maeda, K. Ohno and K. Morokuma, *Phys. Chem. Chem. Phys.*, 2013, **15**, 3683–3701.  
(b) S. Maeda, Y. Harabuchi, M. Takagi, K. Saita, K. Suzuki, T. Ichino, Y. Sumiya, K. Sugiyama and Y. Ono, *J. Comput. Chem.*, 2018, **39**, 233–251. (c) S. Maeda, Y. Harabuchi, Y. Sumiya, M. Takagi, K. Suzuki, M. Hatanaka, Y. Osada, T. Taketsugu, K. Morokuma and K. Ohno, GRRM17, see [http://iqce.jp/GRRM/index\\_e.shtml](http://iqce.jp/GRRM/index_e.shtml) (accessed date 10 Sep., 2020).



- (22) Gaussian 16, Revision B.01, M. J. Frisch, G. W. Trucks, H. B. Schlegel, G. E. Scuseria, M. A. Robb, J. R. Cheeseman, G. Scalmani, V. Barone, G. A. Petersson, H. Nakatsuji, X. Li, M. Caricato, A. V. Marenich, J. Bloino, B. G. Janesko, R. Gomperts, B. Mennucci, H. P. Hratchian, J. V. Ortiz, A. F. Izmaylov, J. L. Sonnenberg, D. Williams-Young, F. Ding, F. Lipparini, F. Egidi, J. Goings, B. Peng, A. Petrone, T. Henderson, D. Ranasinghe, V. G. Zakrzewski, J. Gao, N. Rega, G. Zheng, W. Liang, M. Hada, M. Ehara, K. Toyota, R. Fukuda, J. Hasegawa, M. Ishida, T. Nakajima, Y. Honda, O. Kitao, H. Nakai, T. Vreven, K. Throssell, J. A. Montgomery, Jr., J. E. Peralta, F. Ogliaro, M. J. Bearpark, J. J. Heyd, E. N. Brothers, K. N. Kudin, V. N. Staroverov, T. A. Keith, R. Kobayashi, J. Normand, K. Raghavachari, A. P. Rendell, J. C. Burant, S. S. Iyengar, J. Tomasi, M. Cossi, J. M. Millam, M. Klene, C. Adamo, R. Cammi, J. W. Ochterski, R. L. Martin, K. Morokuma, O. Farkas, J. B. Foresman and D. J. Fox, Gaussian, Inc., Wallingford CT, 2016.
- (23) J.-D. Chai and M. Head-Gordon, *Phys. Chem. Chem. Phys.*, 2008, **10**, 6615–6620.
- (24) A. V. Marenich, C. J. Cramer and D. G. Truhlar, *J. Phys. Chem. B.*, 2009, **113**, 6378–6396.
- (25) C. Y. Legault, CYLview, Version 1.0b, Université de Sherbrooke (2009).
- (26) I. Ikenaga, K. Kikukawa and T. Matsuda, *J. Org. Chem.*, 1987, **52**, 1276–1280.
- (27) S. I. Faßbender, J. J. Molloy, C. M.-Lichtenfeld and R. Gilmour, *Angew. Chem. Int. Ed.*, 2019, **58**, 18619–18626.
- (28) K. Okamoto and T. Hayashi, *Chem. Lett.*, 2008, **37**, 108–109.
- (29) N. Selander, J. R. Paasch and K. J. Szabó, *J. Am. Chem. Soc.*, 2011, **133**, 409–411.

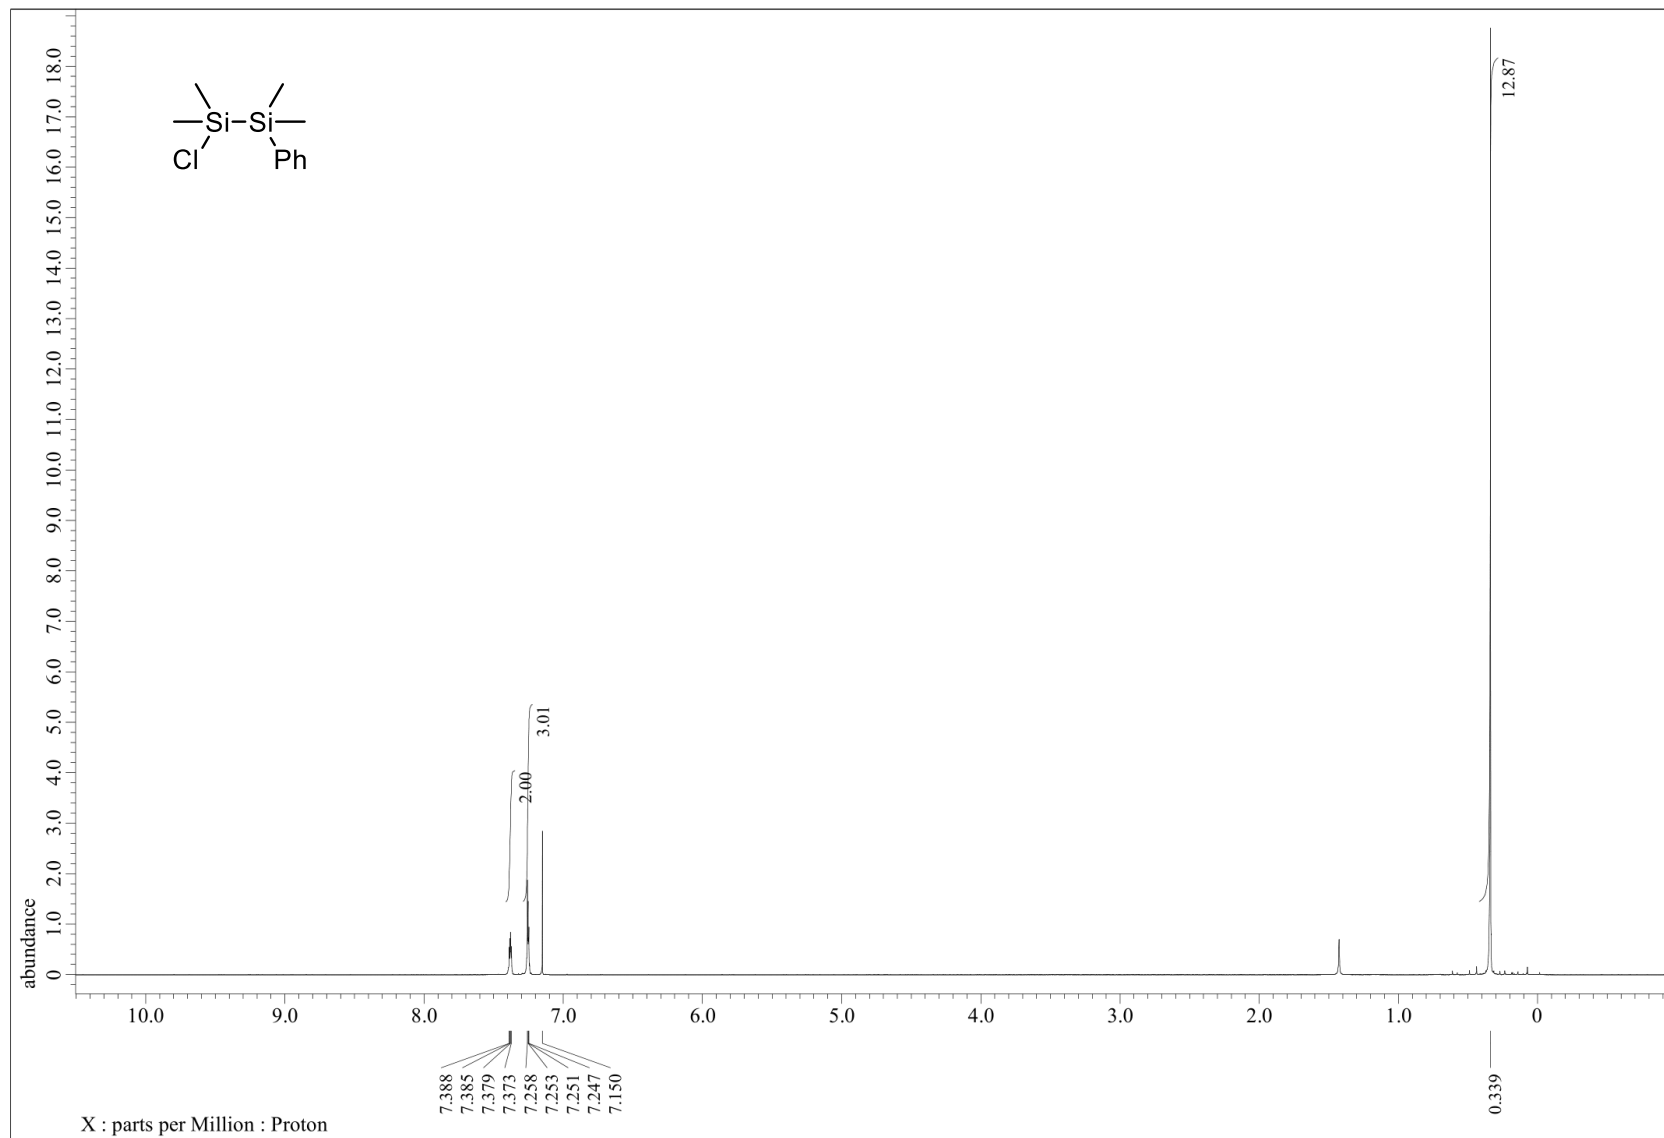

Figure S6.  $^1\text{H}$  NMR (600 MHz,  $\text{C}_6\text{D}_6$ ) spectrum of S1

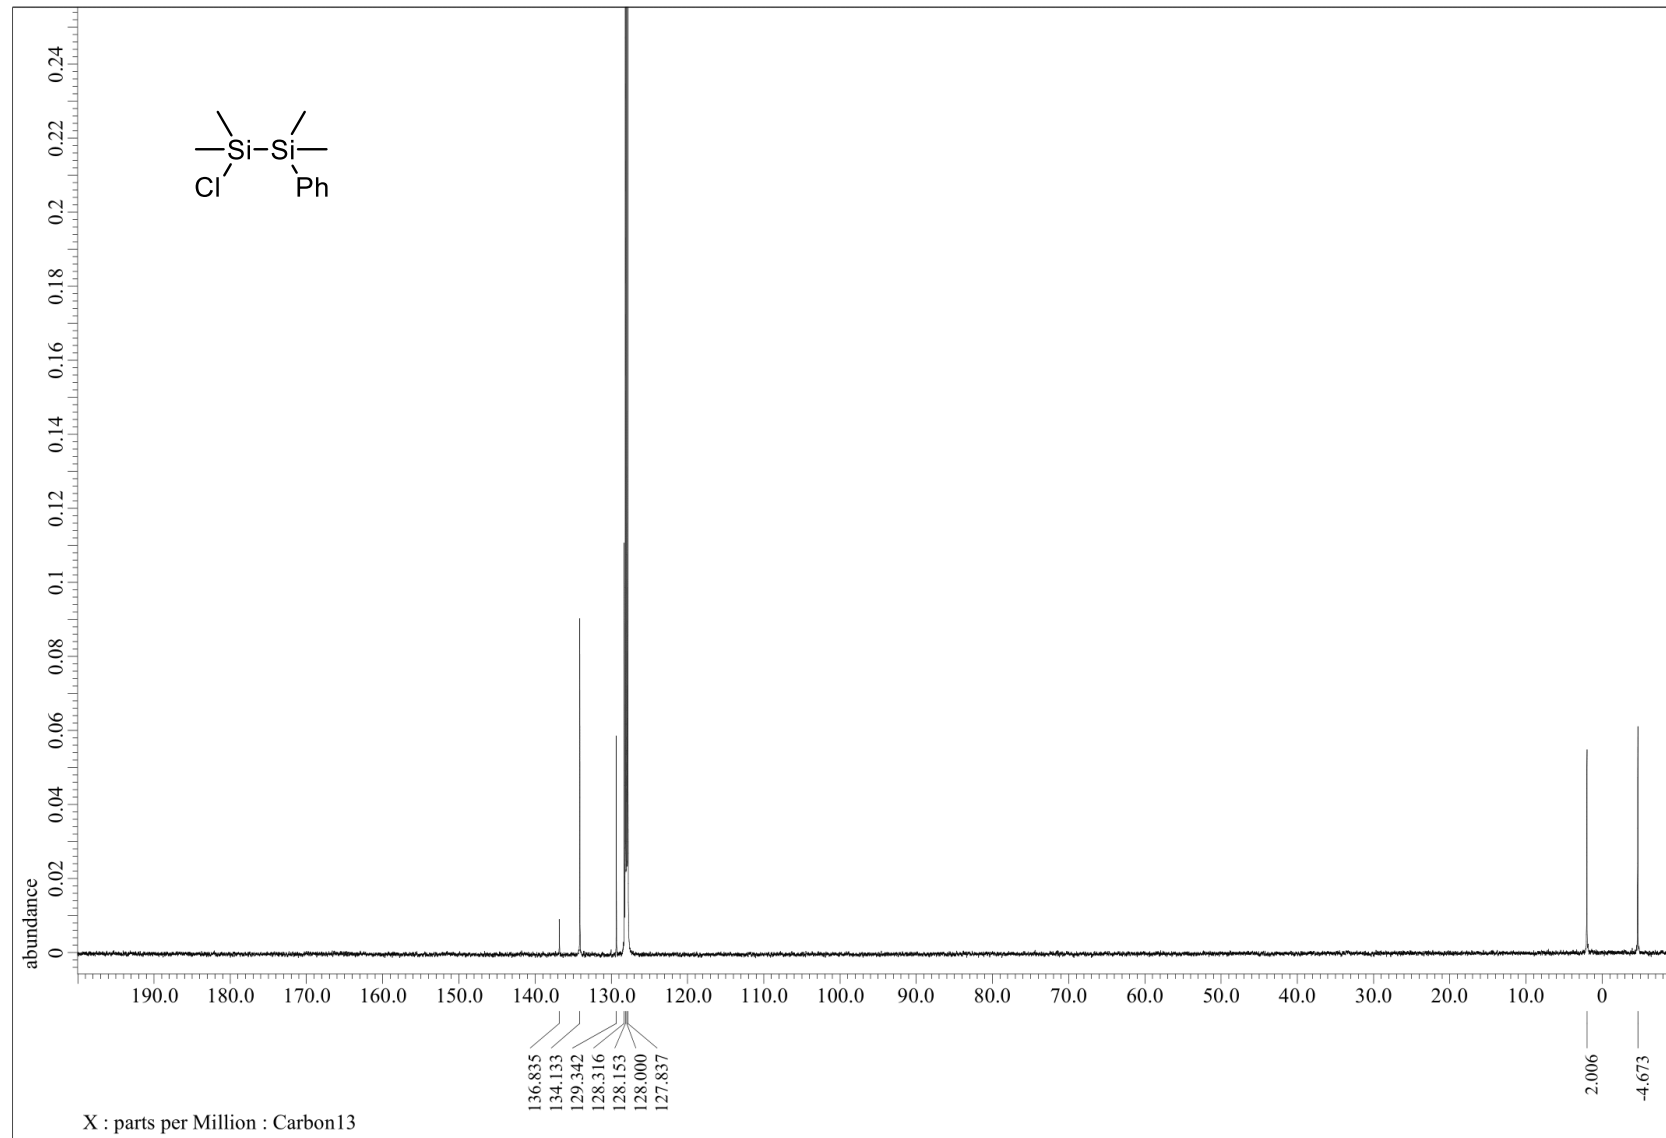

Figure S7.  $^{13}\text{C}$  NMR (151 MHz,  $\text{C}_6\text{D}_6$ ) spectrum of **S1**

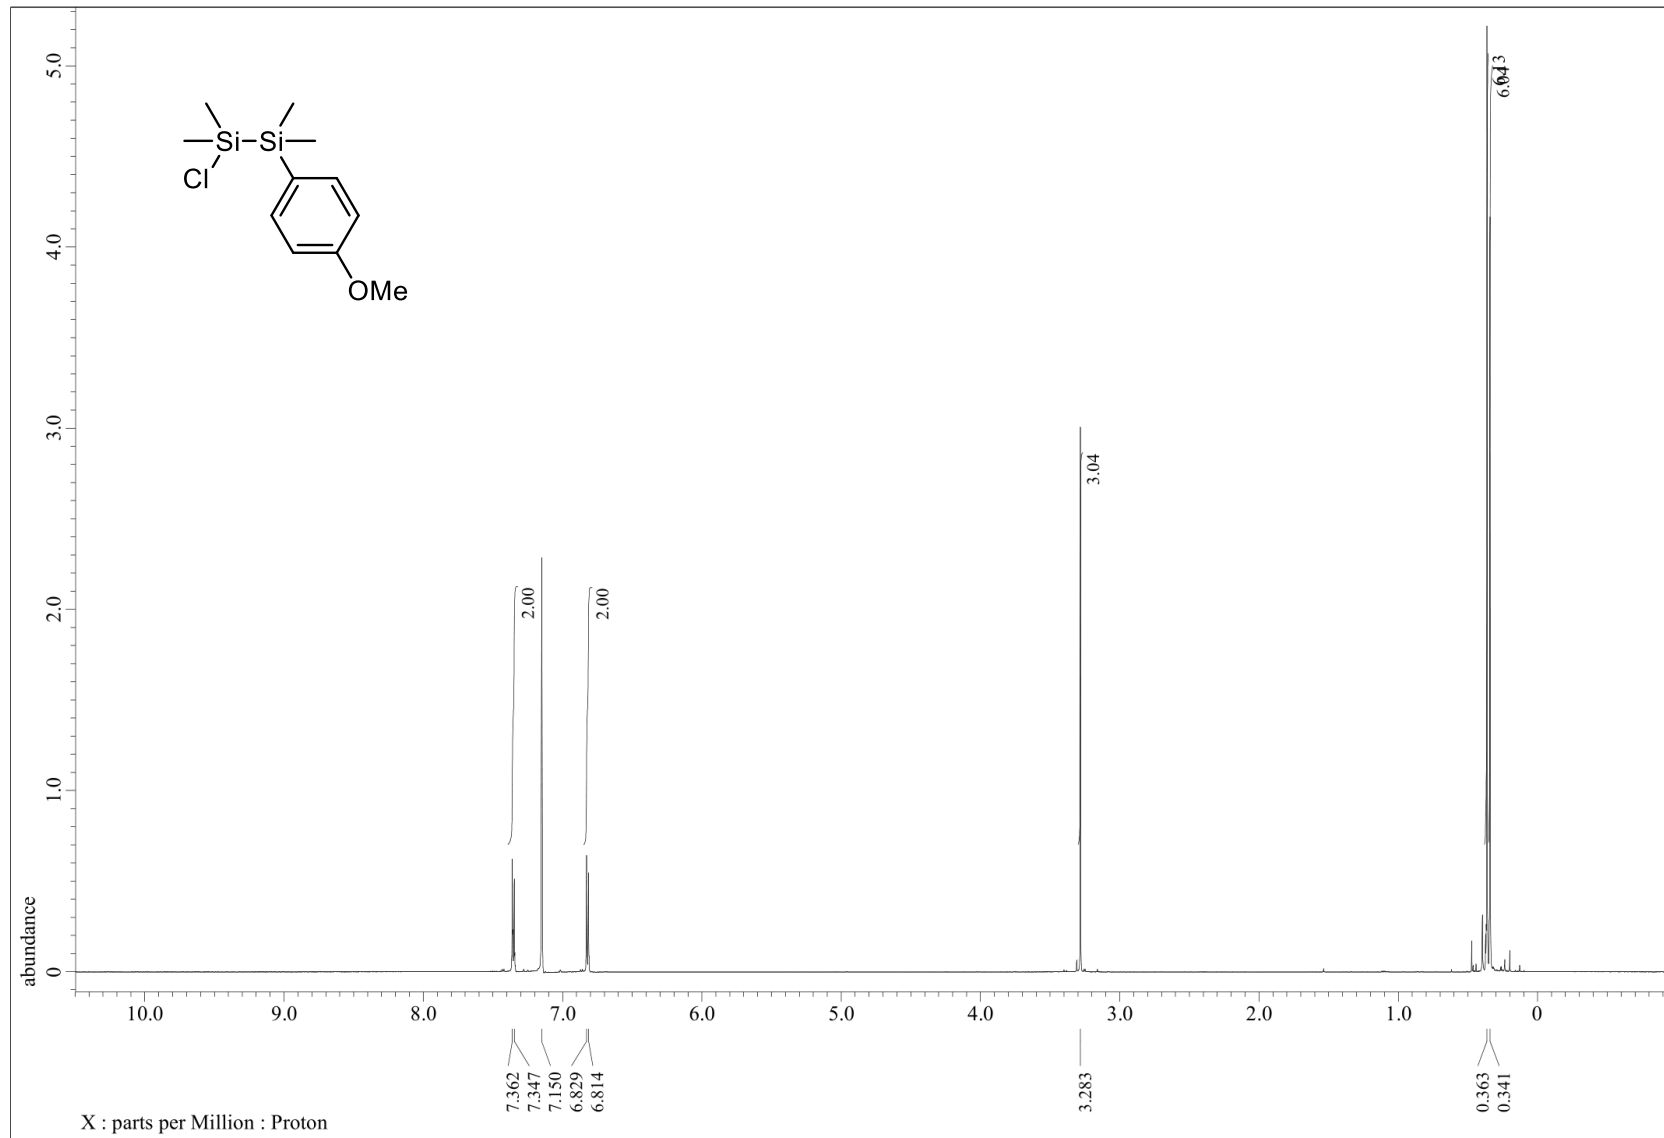

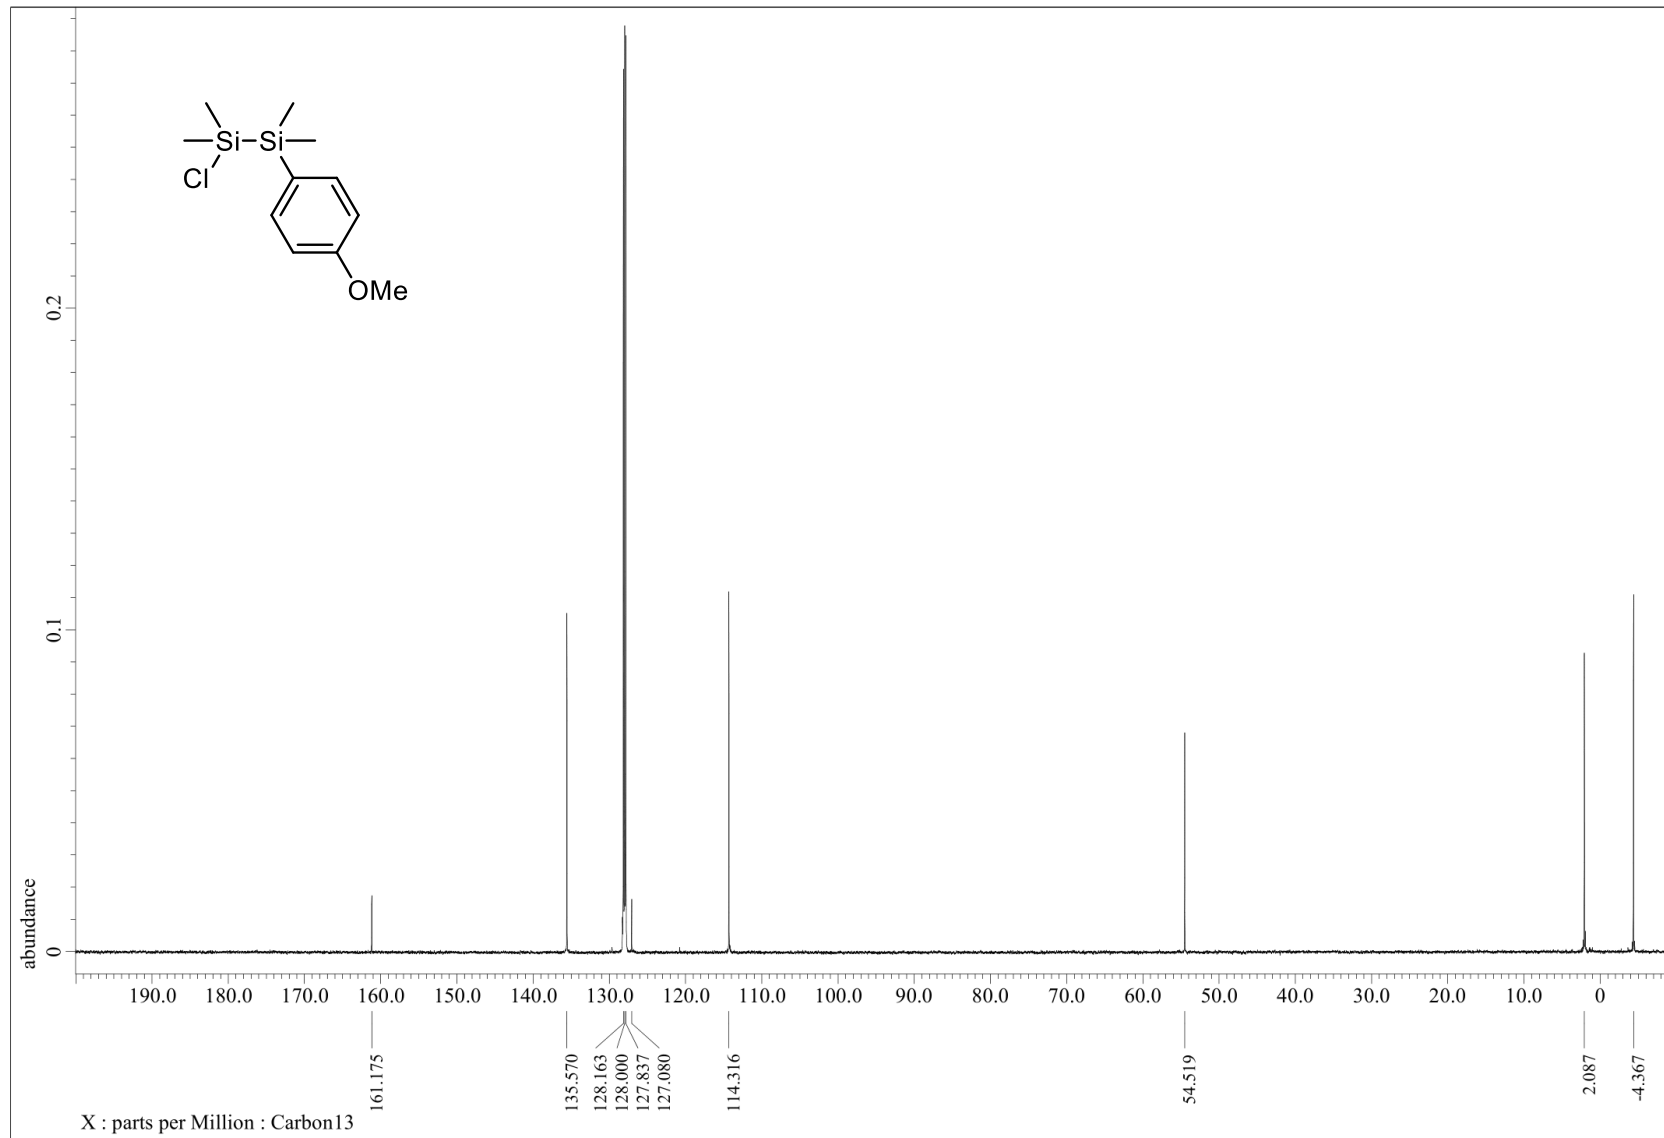

**Figure S9.** <sup>13</sup>C NMR (151 MHz, C<sub>6</sub>D<sub>6</sub>) spectrum of **S2**

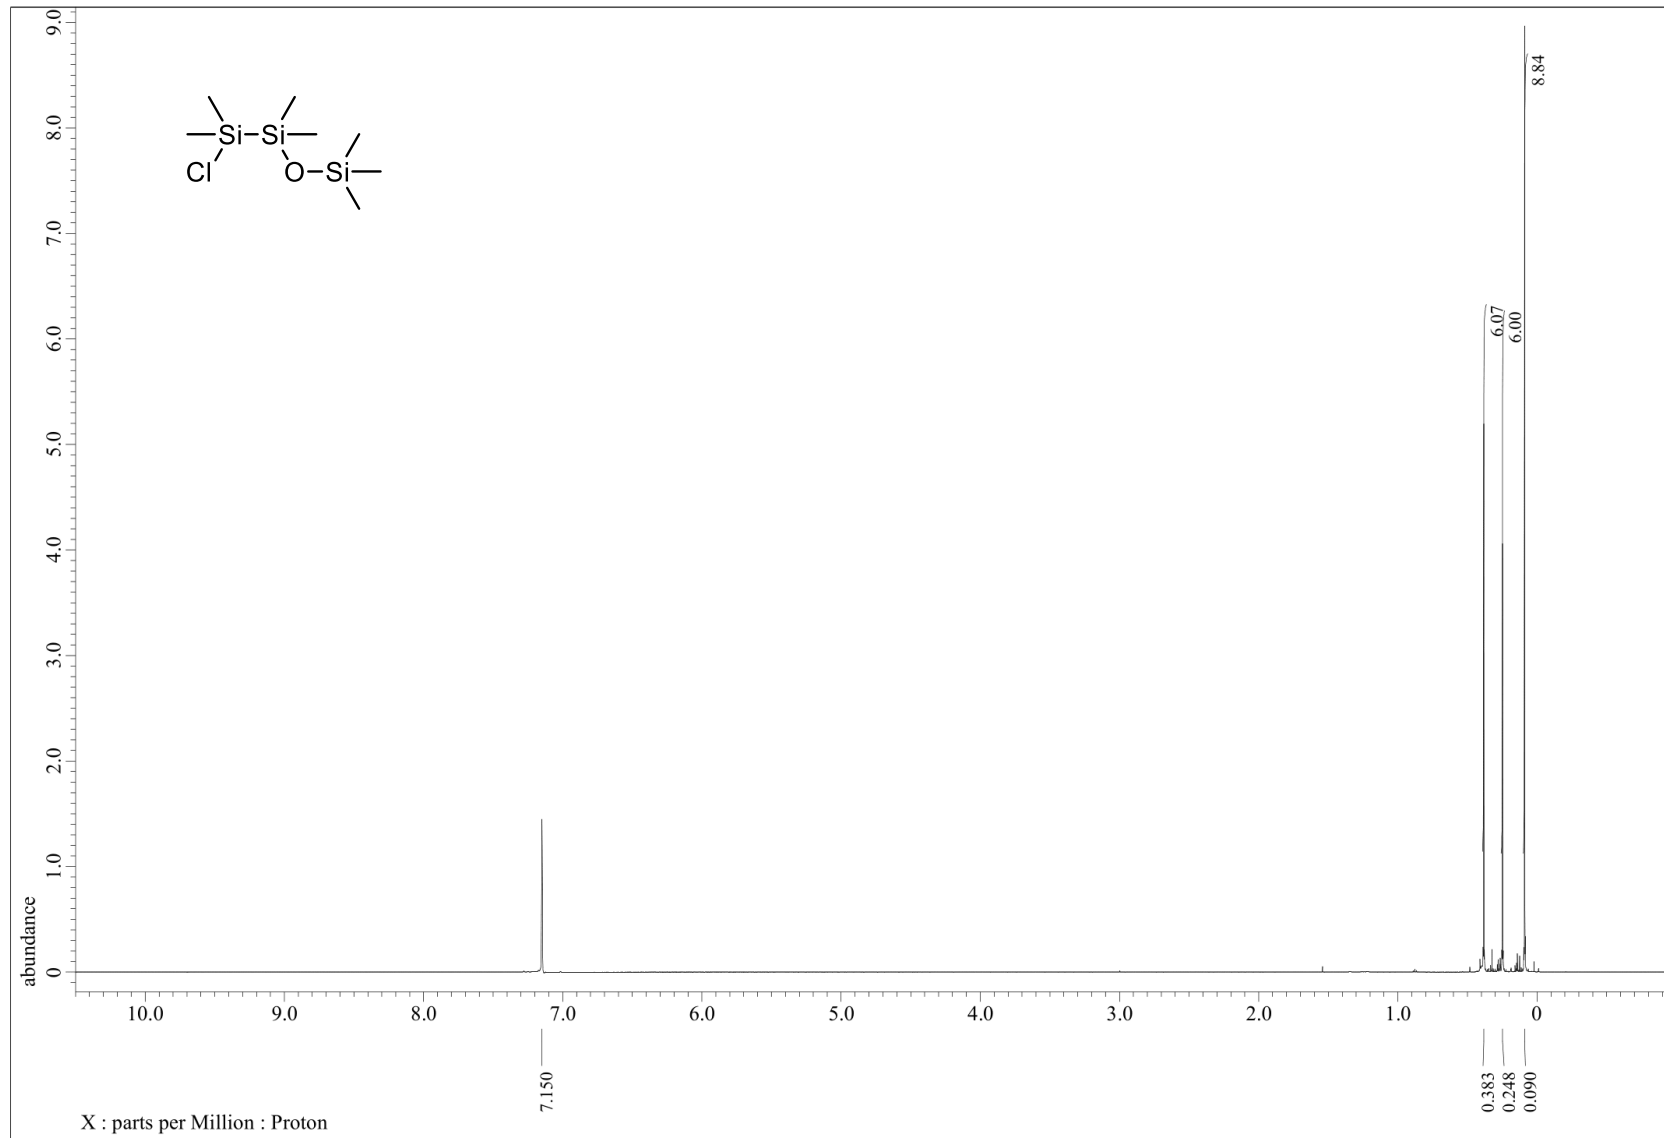

**Figure S10.**  $^1\text{H}$  NMR (600 MHz,  $\text{C}_6\text{D}_6$ ) spectrum of S3

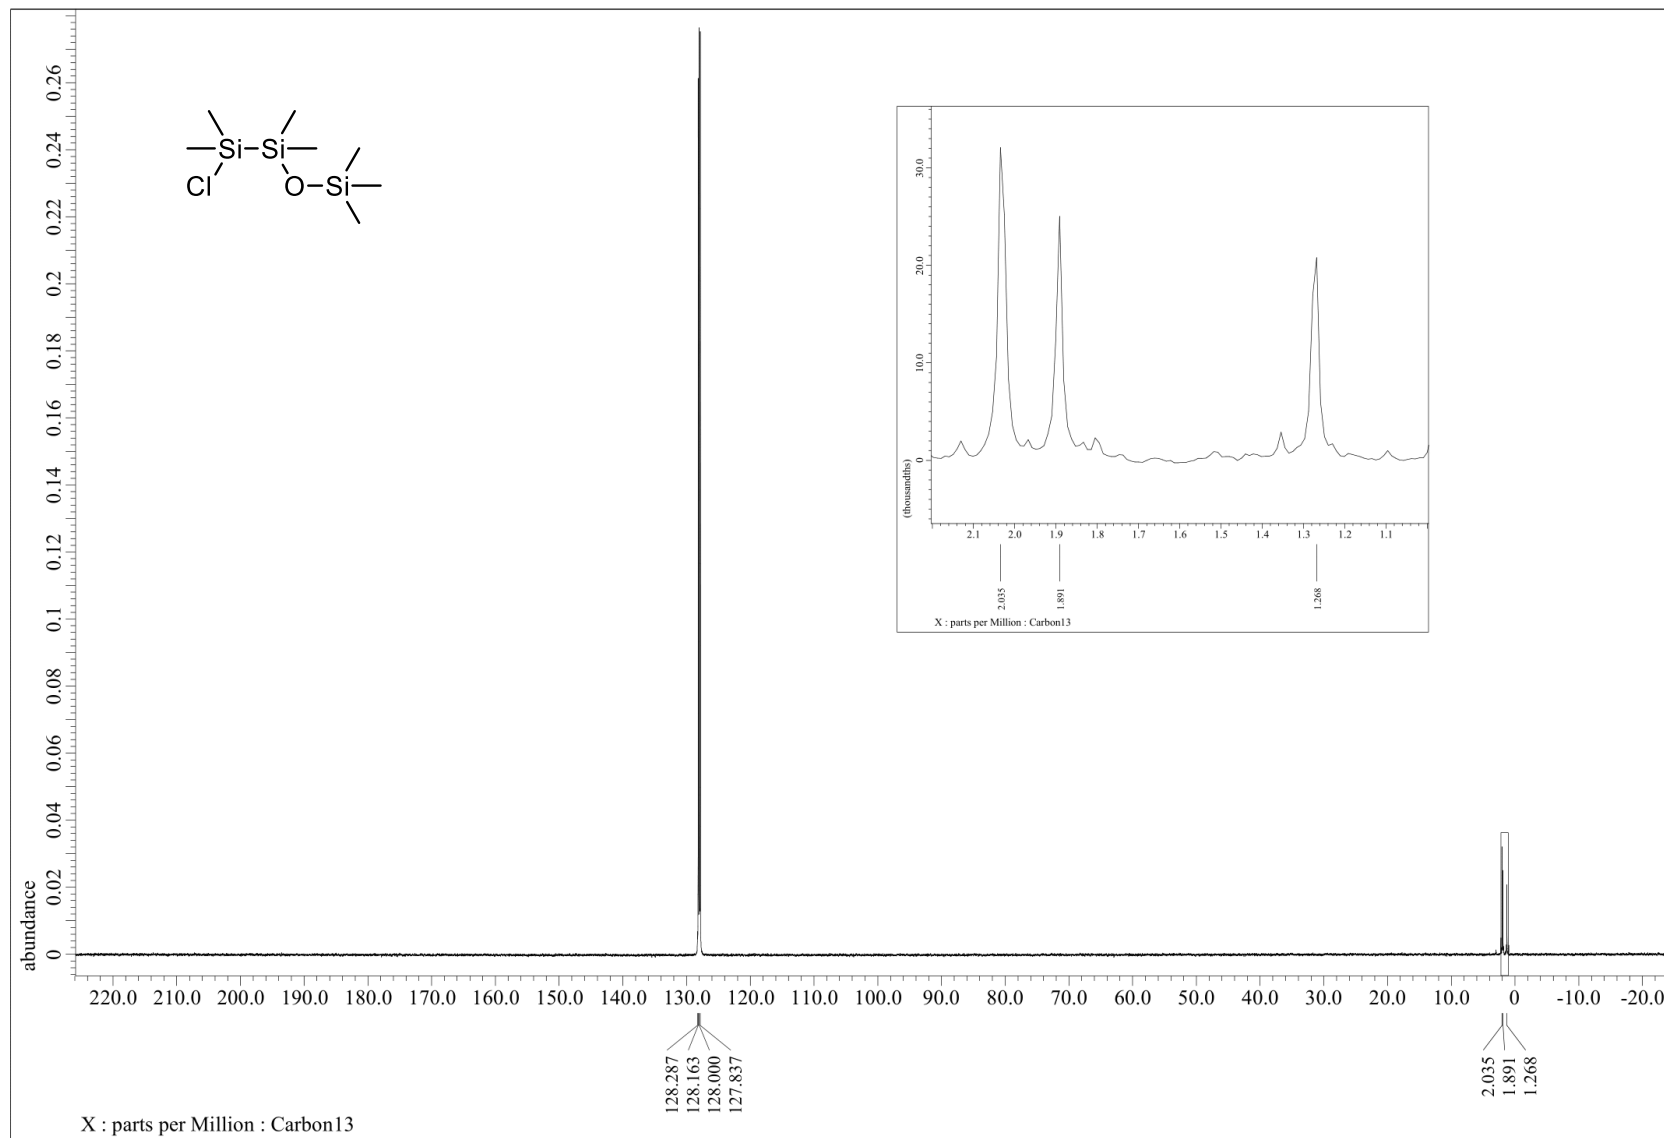

Figure S11.  $^{13}\text{C}$  NMR (151 MHz,  $\text{C}_6\text{D}_6$ ) spectrum of S3

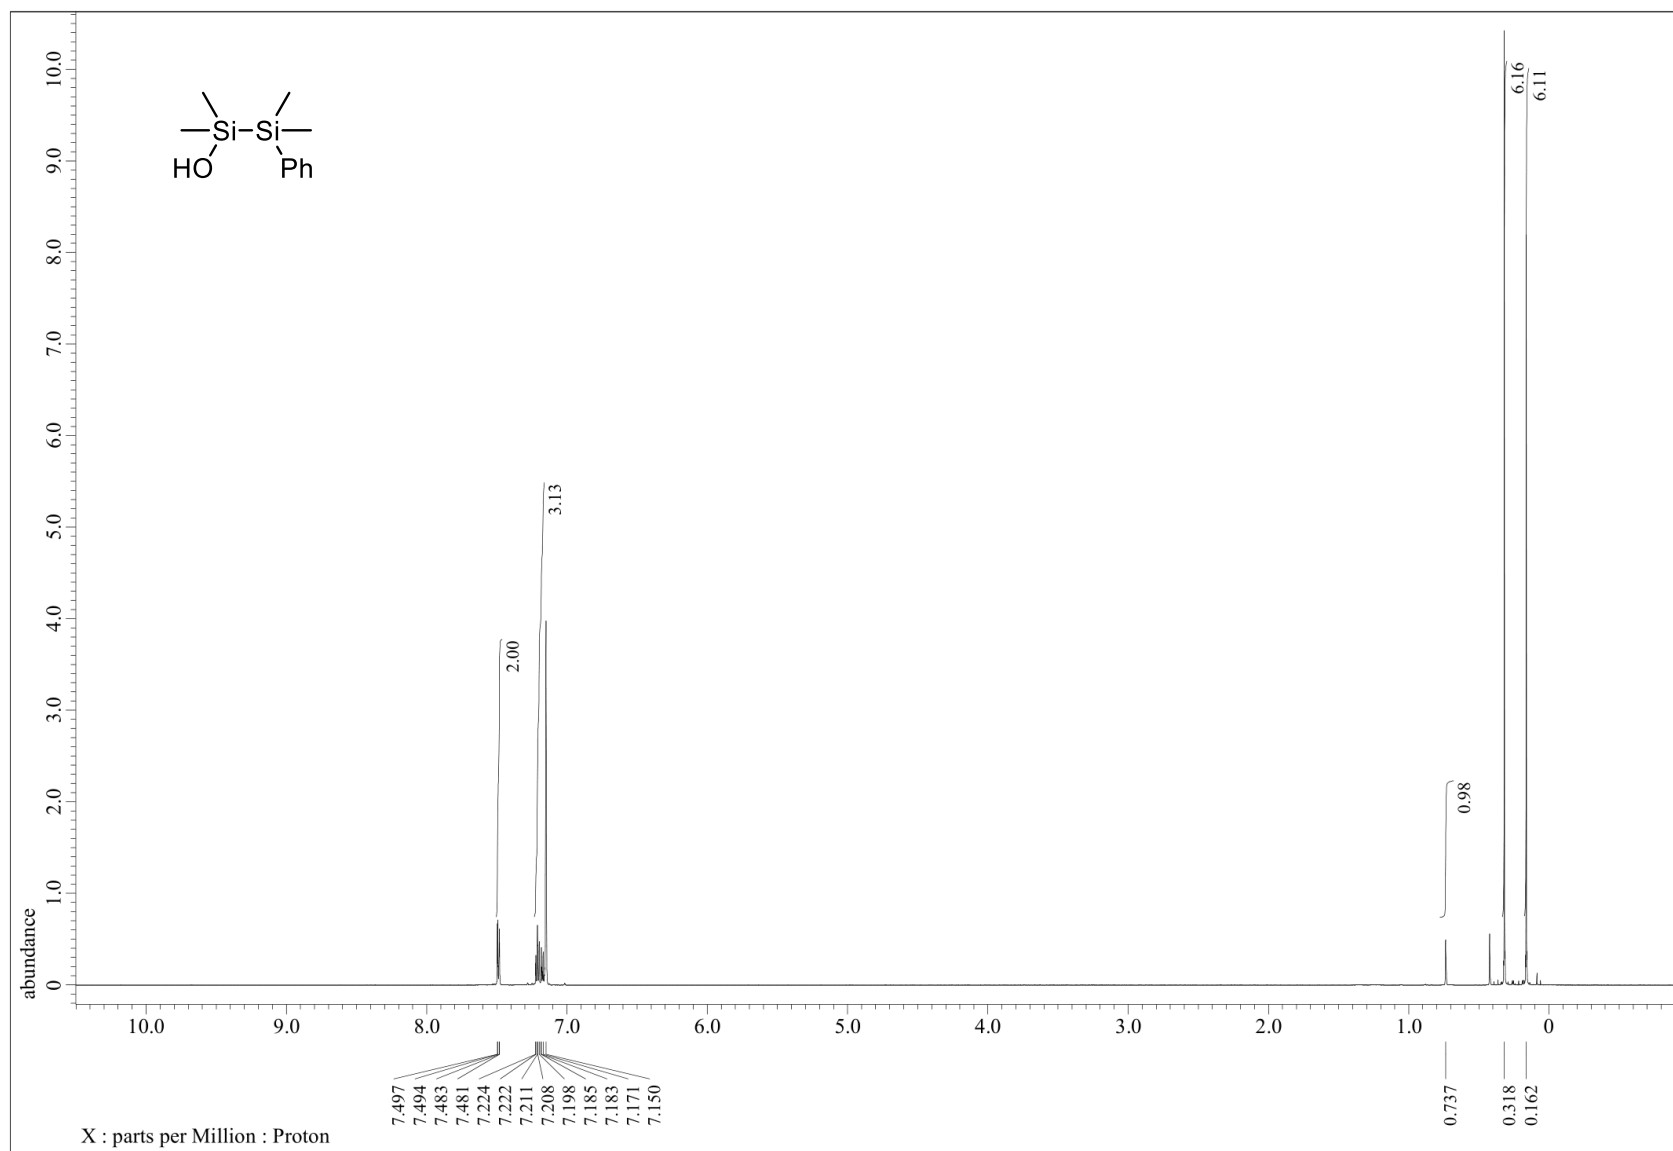

Figure S12.  $^1\text{H}$  NMR (600 MHz,  $\text{C}_6\text{D}_6$ ) spectrum of S4



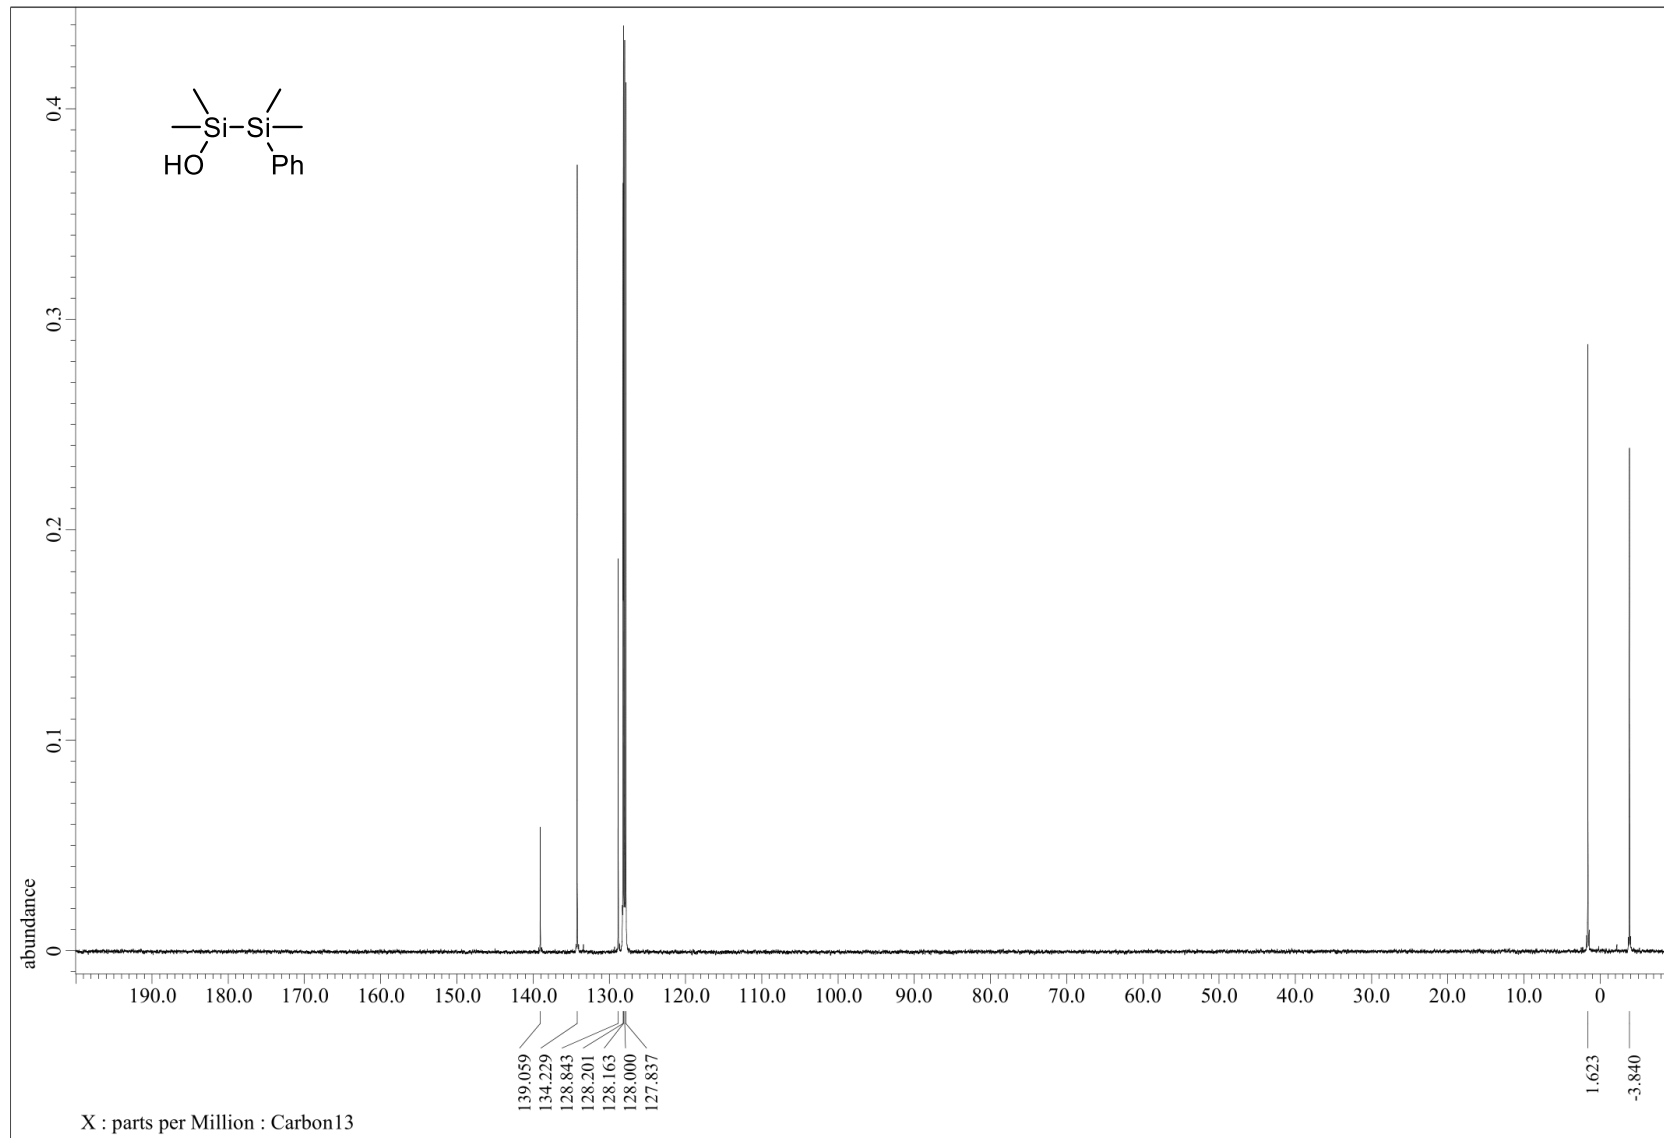

Figure S13.  $^{13}\text{C}$  NMR (151 MHz,  $\text{C}_6\text{D}_6$ ) spectrum of S4

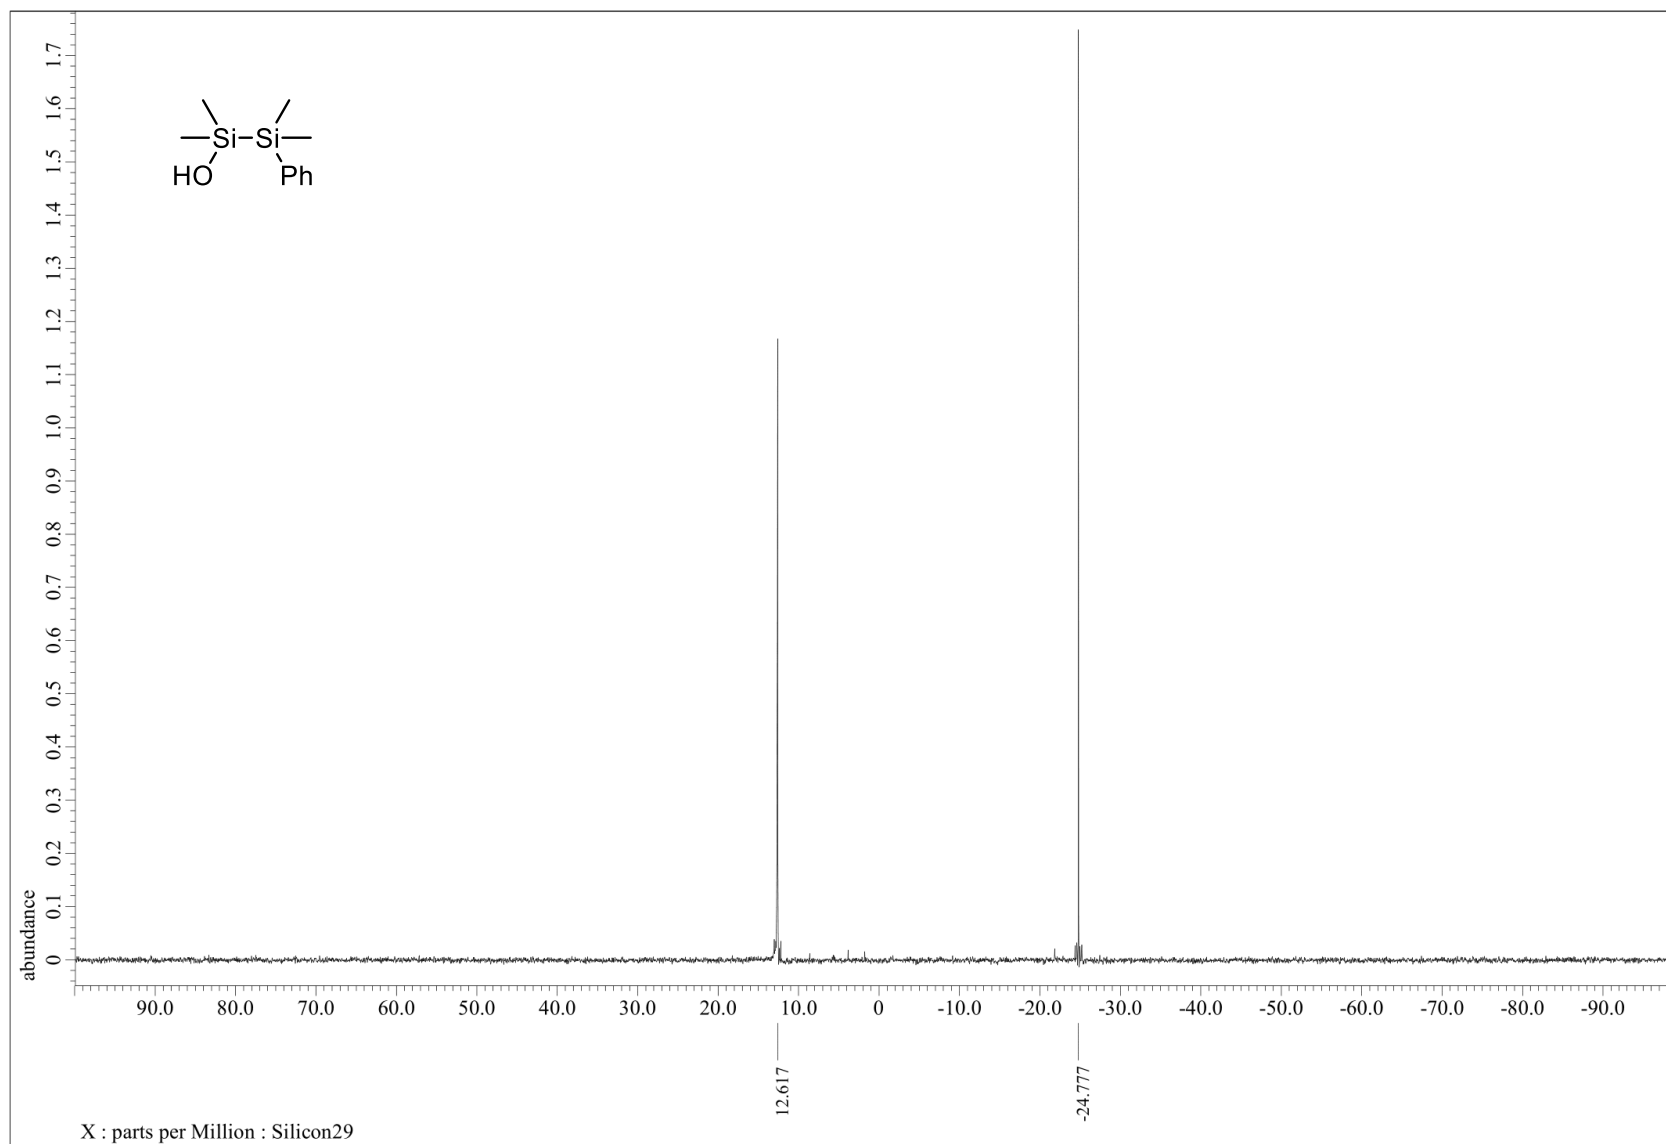

**Figure S14.**  $^{29}\text{Si}$  NMR (119 MHz,  $\text{C}_6\text{D}_6$ ) spectrum of S4

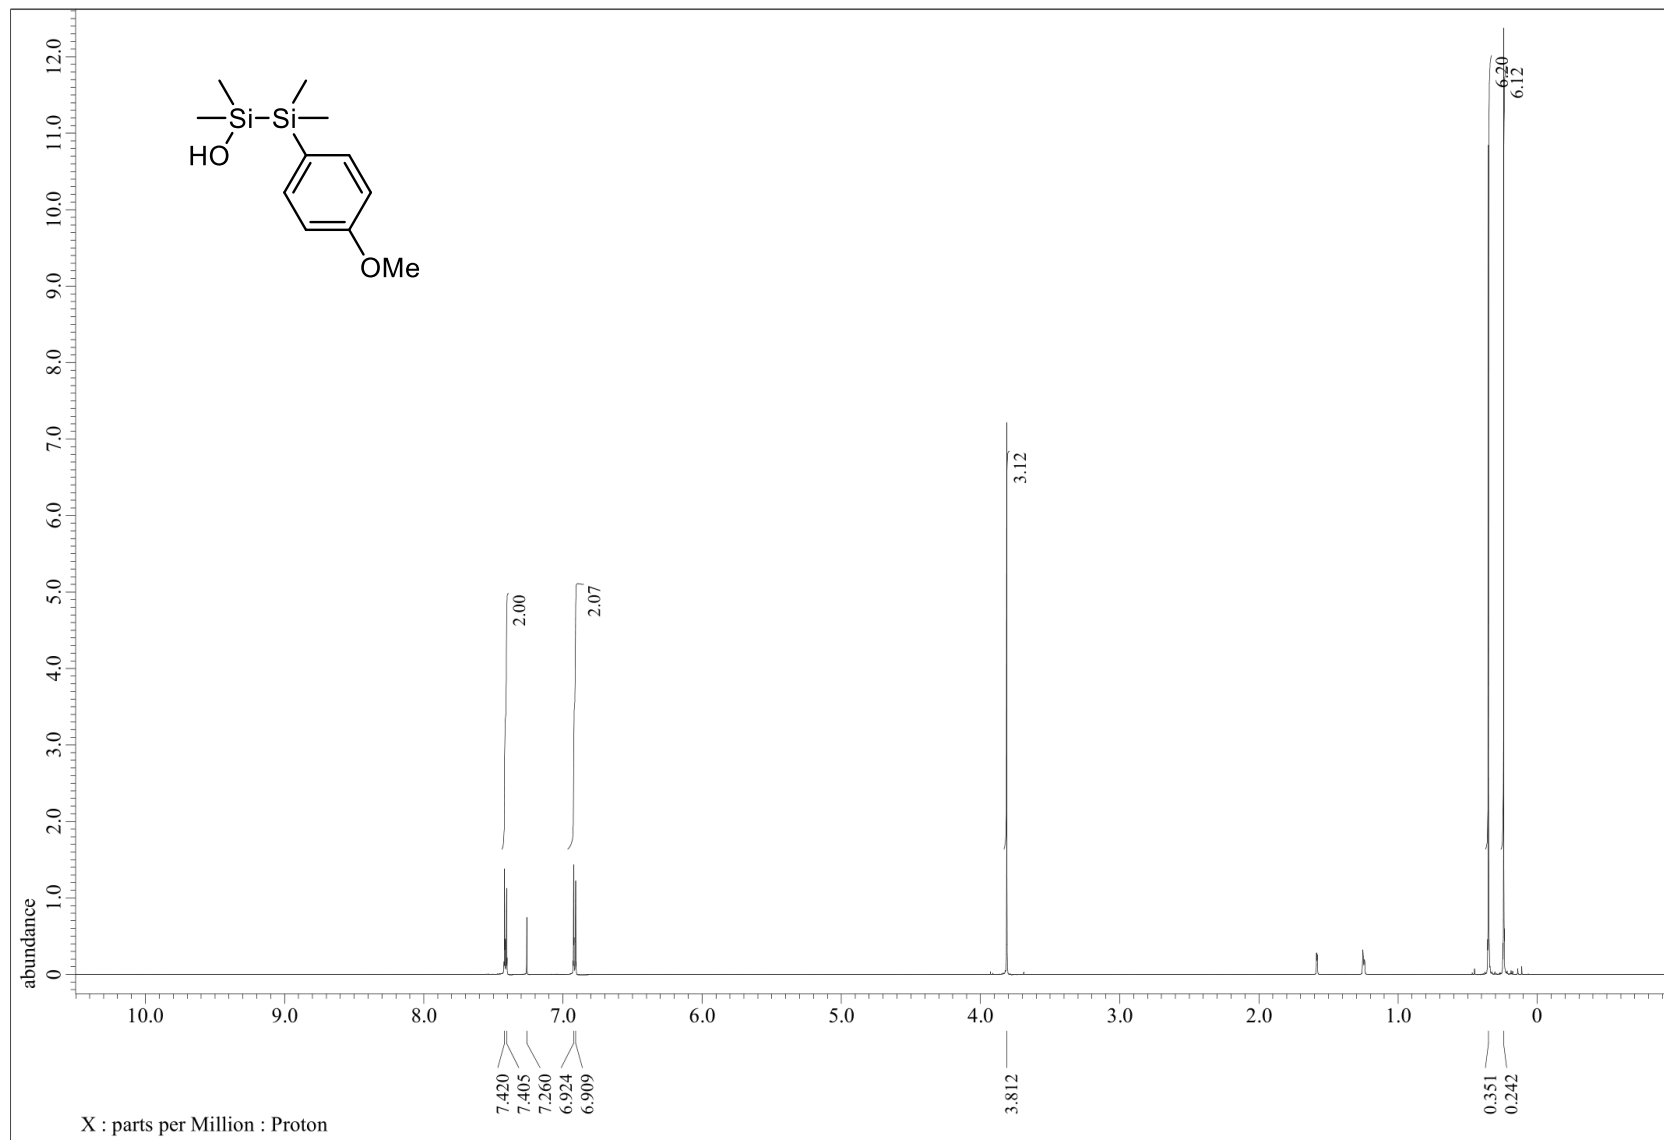

Figure S15. <sup>1</sup>H NMR (600 MHz, CDCl<sub>3</sub>) spectrum of S5

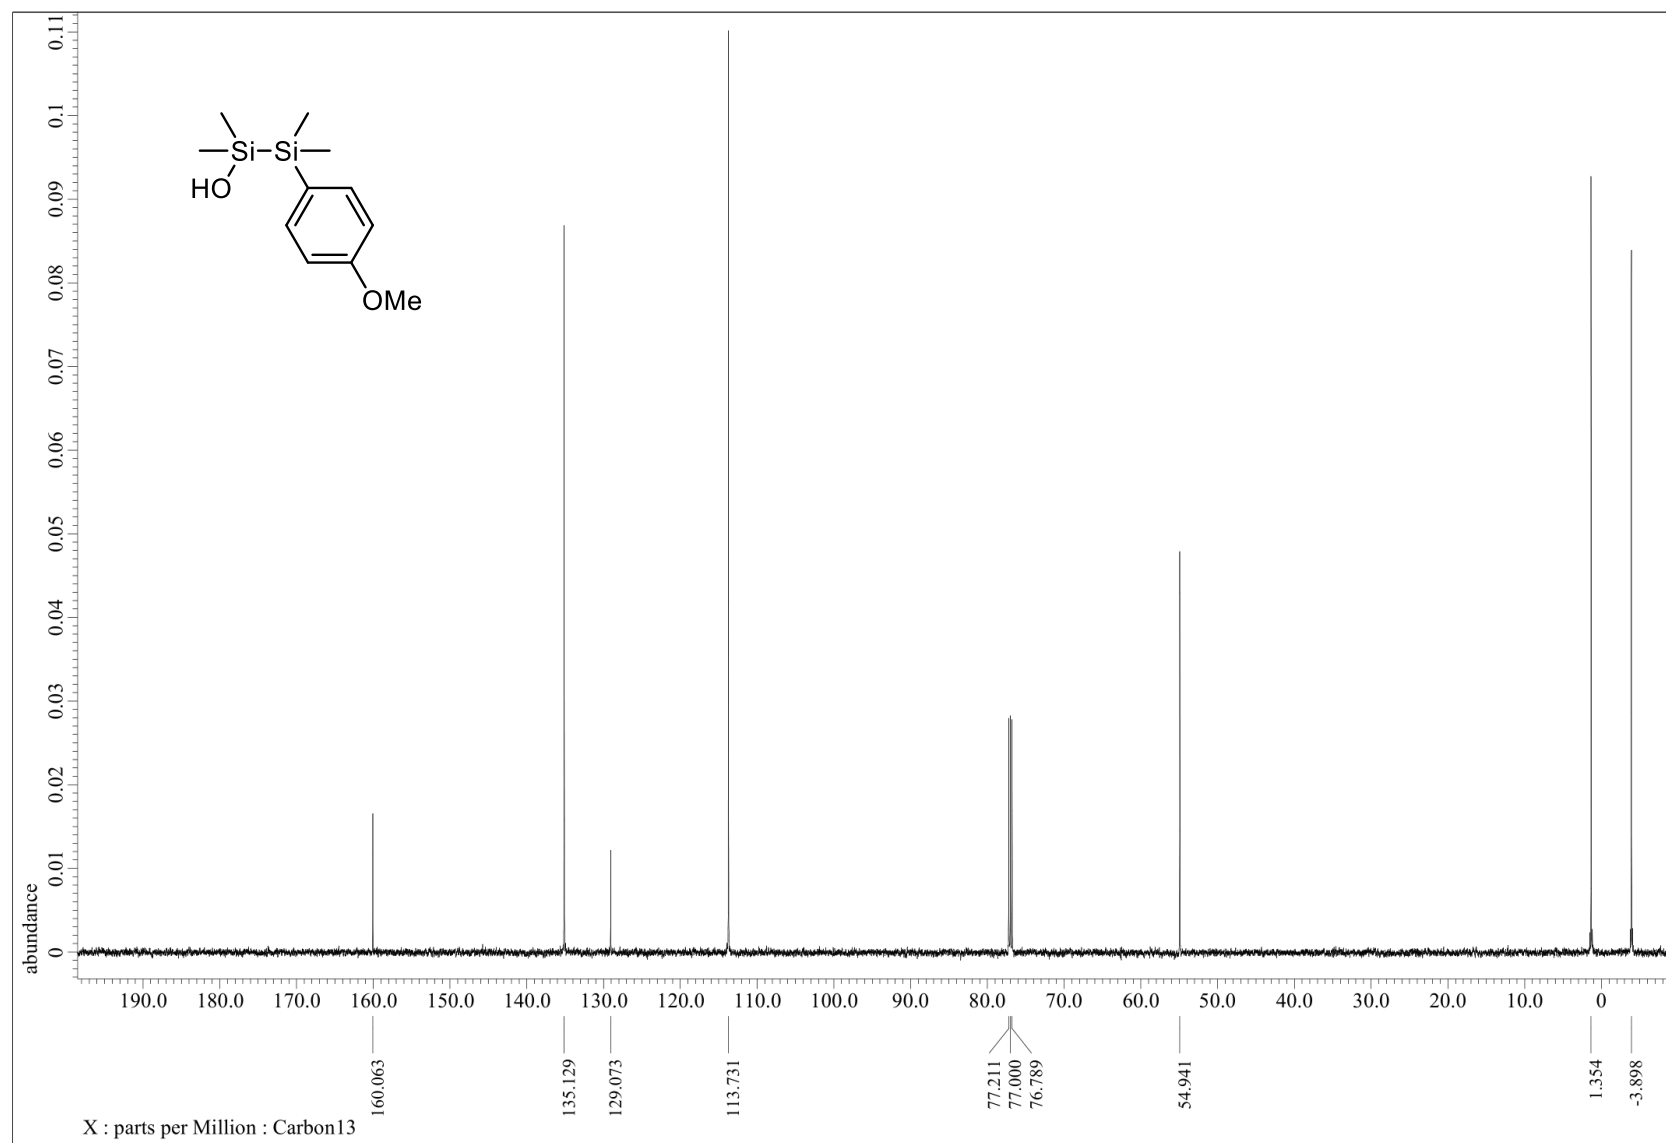

Figure S16. <sup>13</sup>C NMR (151 MHz, CDCl<sub>3</sub>) spectrum of S5

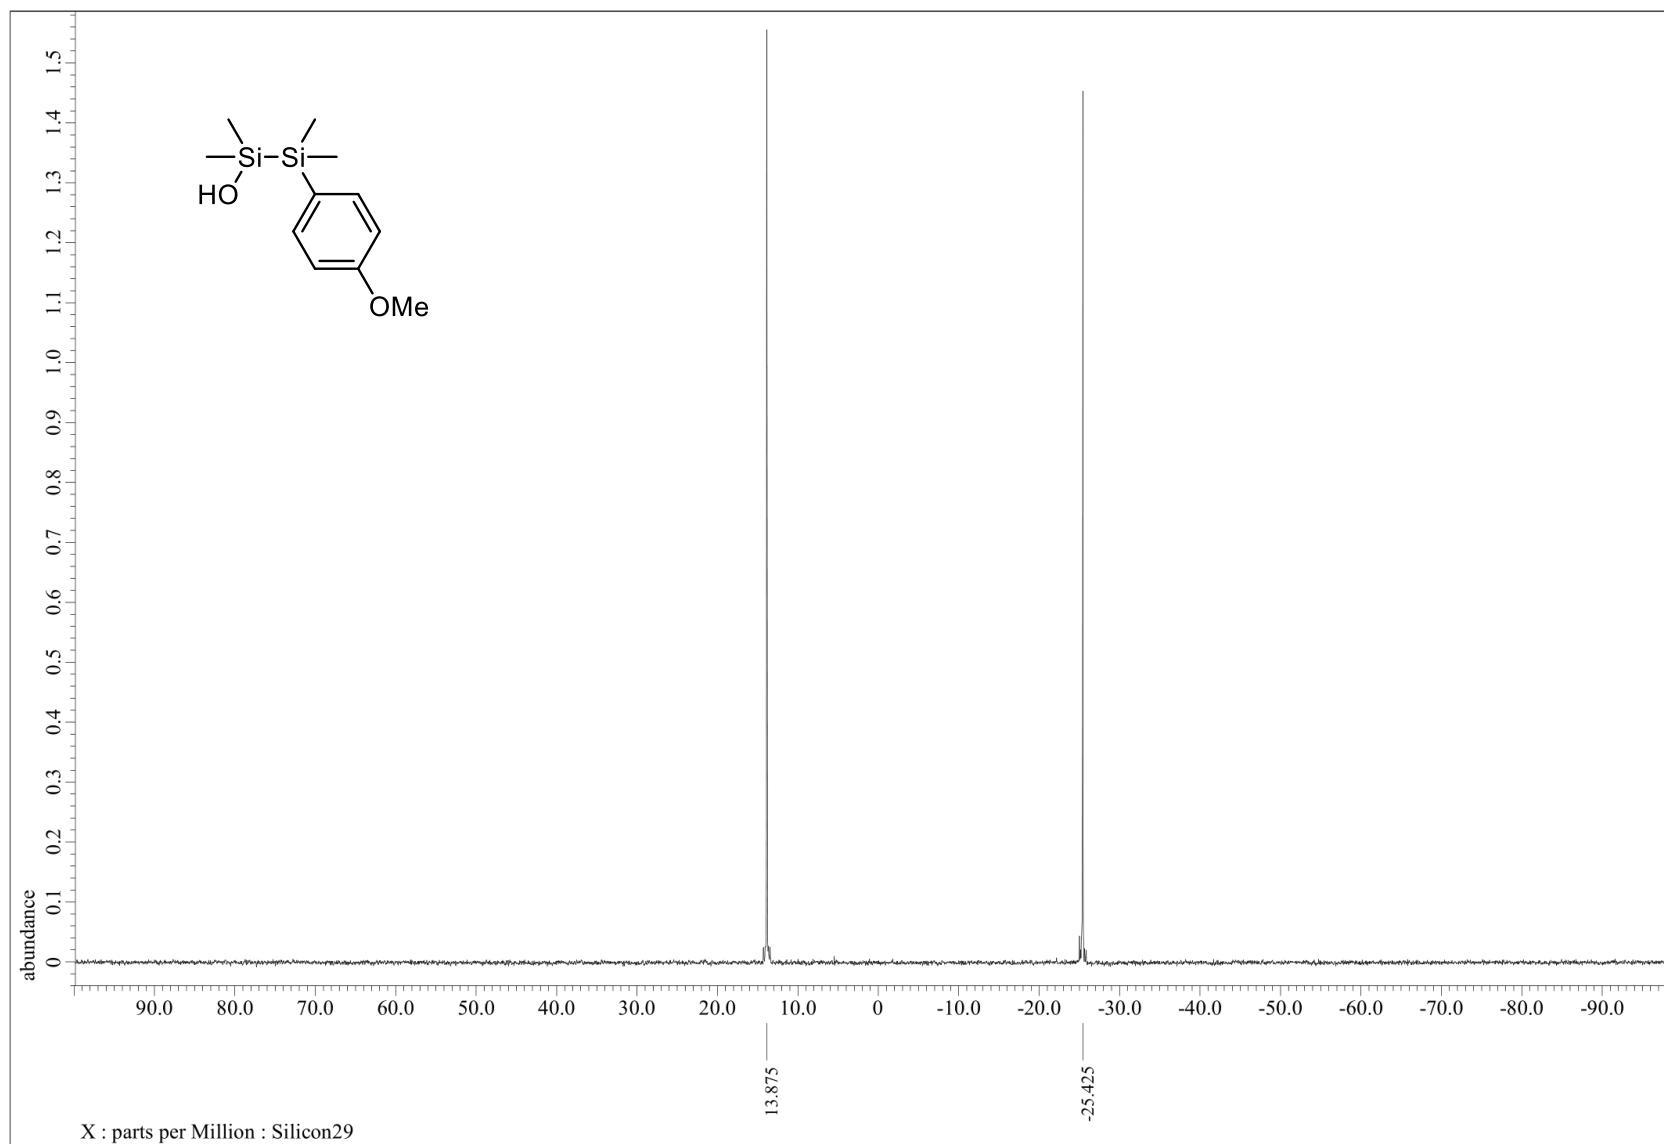

Figure S17.  $^{29}\text{Si}$  NMR (119 MHz,  $\text{CDCl}_3$ ) spectrum of S5

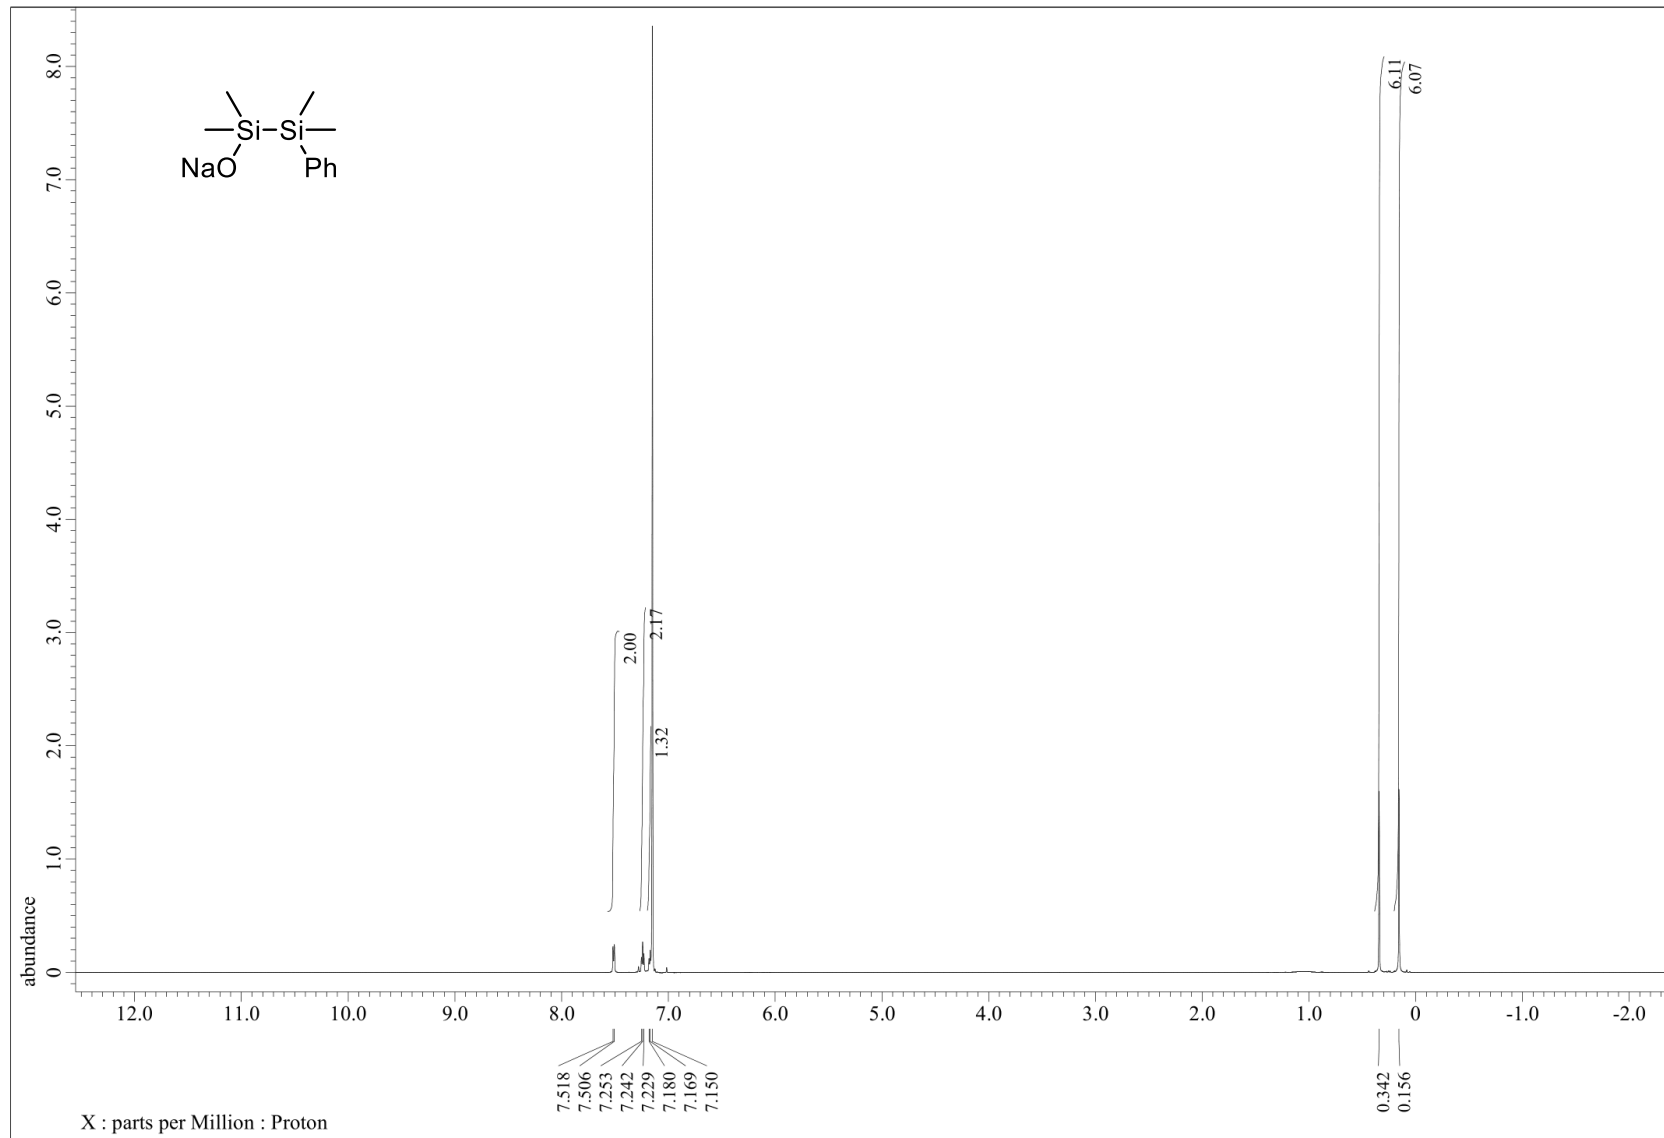

**Figure S18.** <sup>1</sup>H NMR (600 MHz, C<sub>6</sub>D<sub>6</sub>) spectrum of **1-Ph**

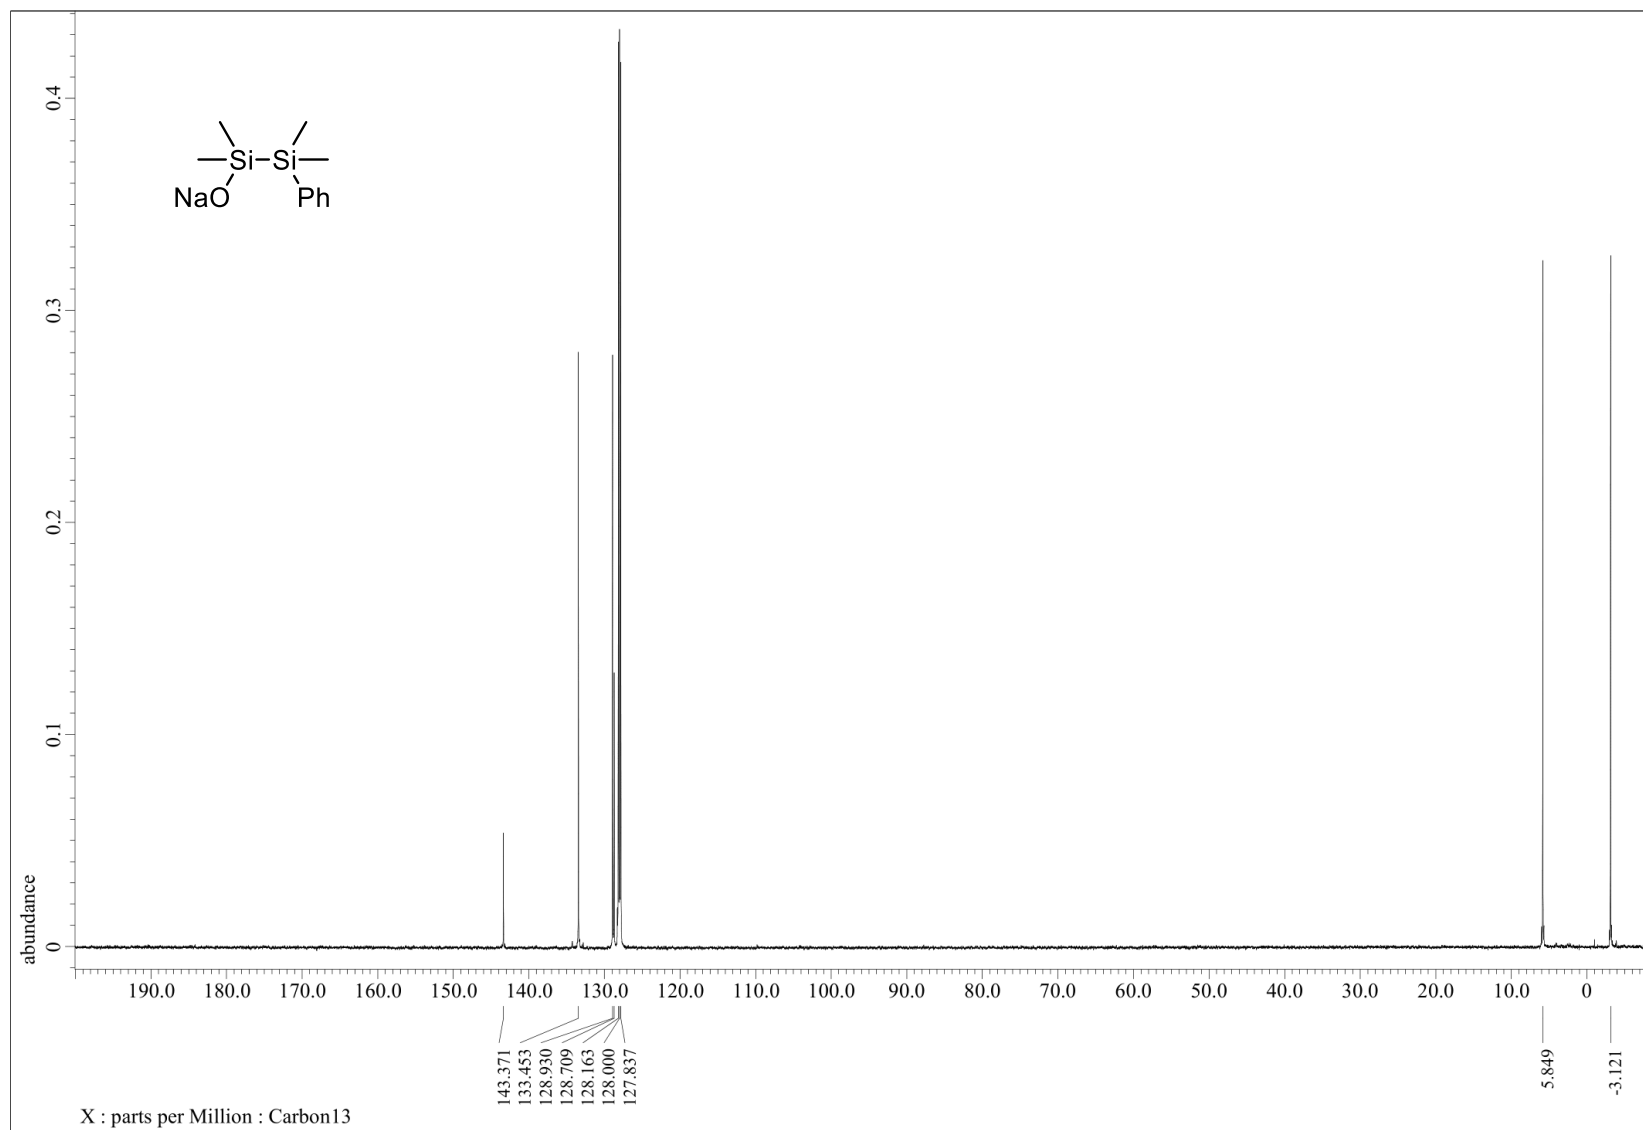

**Figure S19.** <sup>13</sup>C NMR (151 MHz, C<sub>6</sub>D<sub>6</sub>) spectrum of **1-Ph**

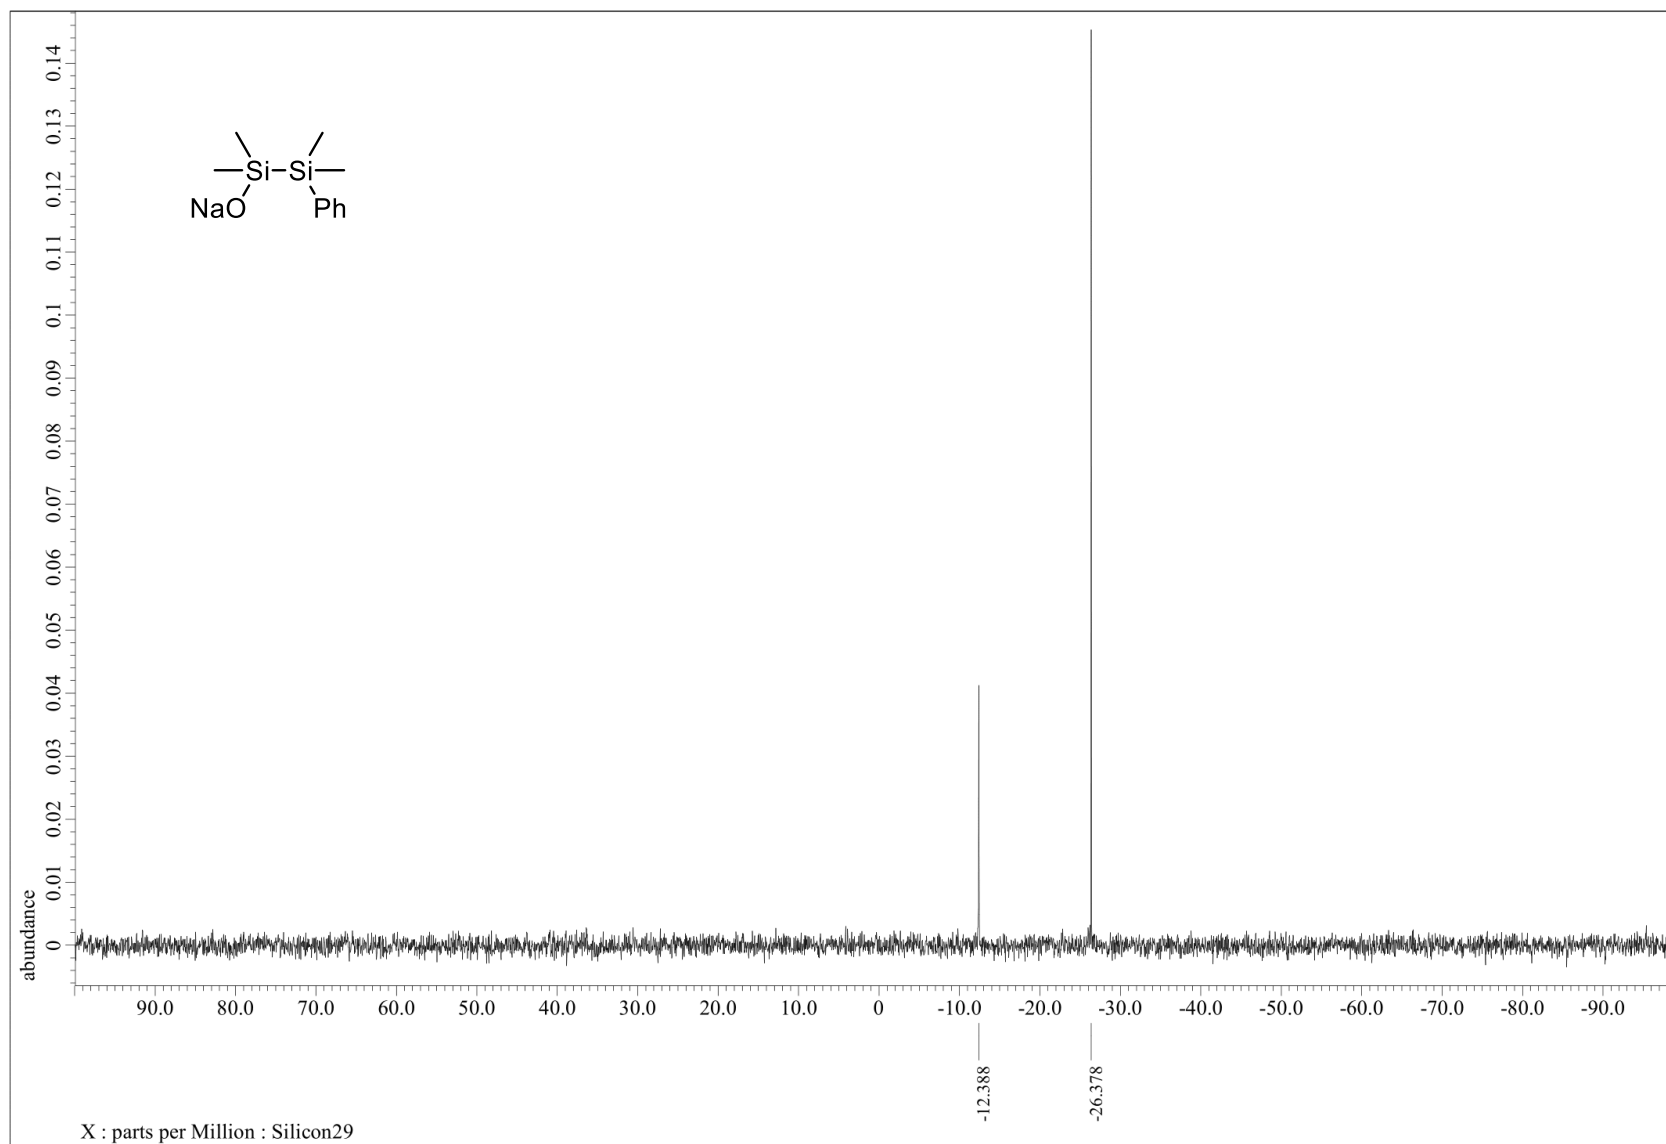

**Figure S20.**  $^{29}\text{Si}$  NMR (119 MHz,  $\text{C}_6\text{D}_6$ ) spectrum of **1-Ph**



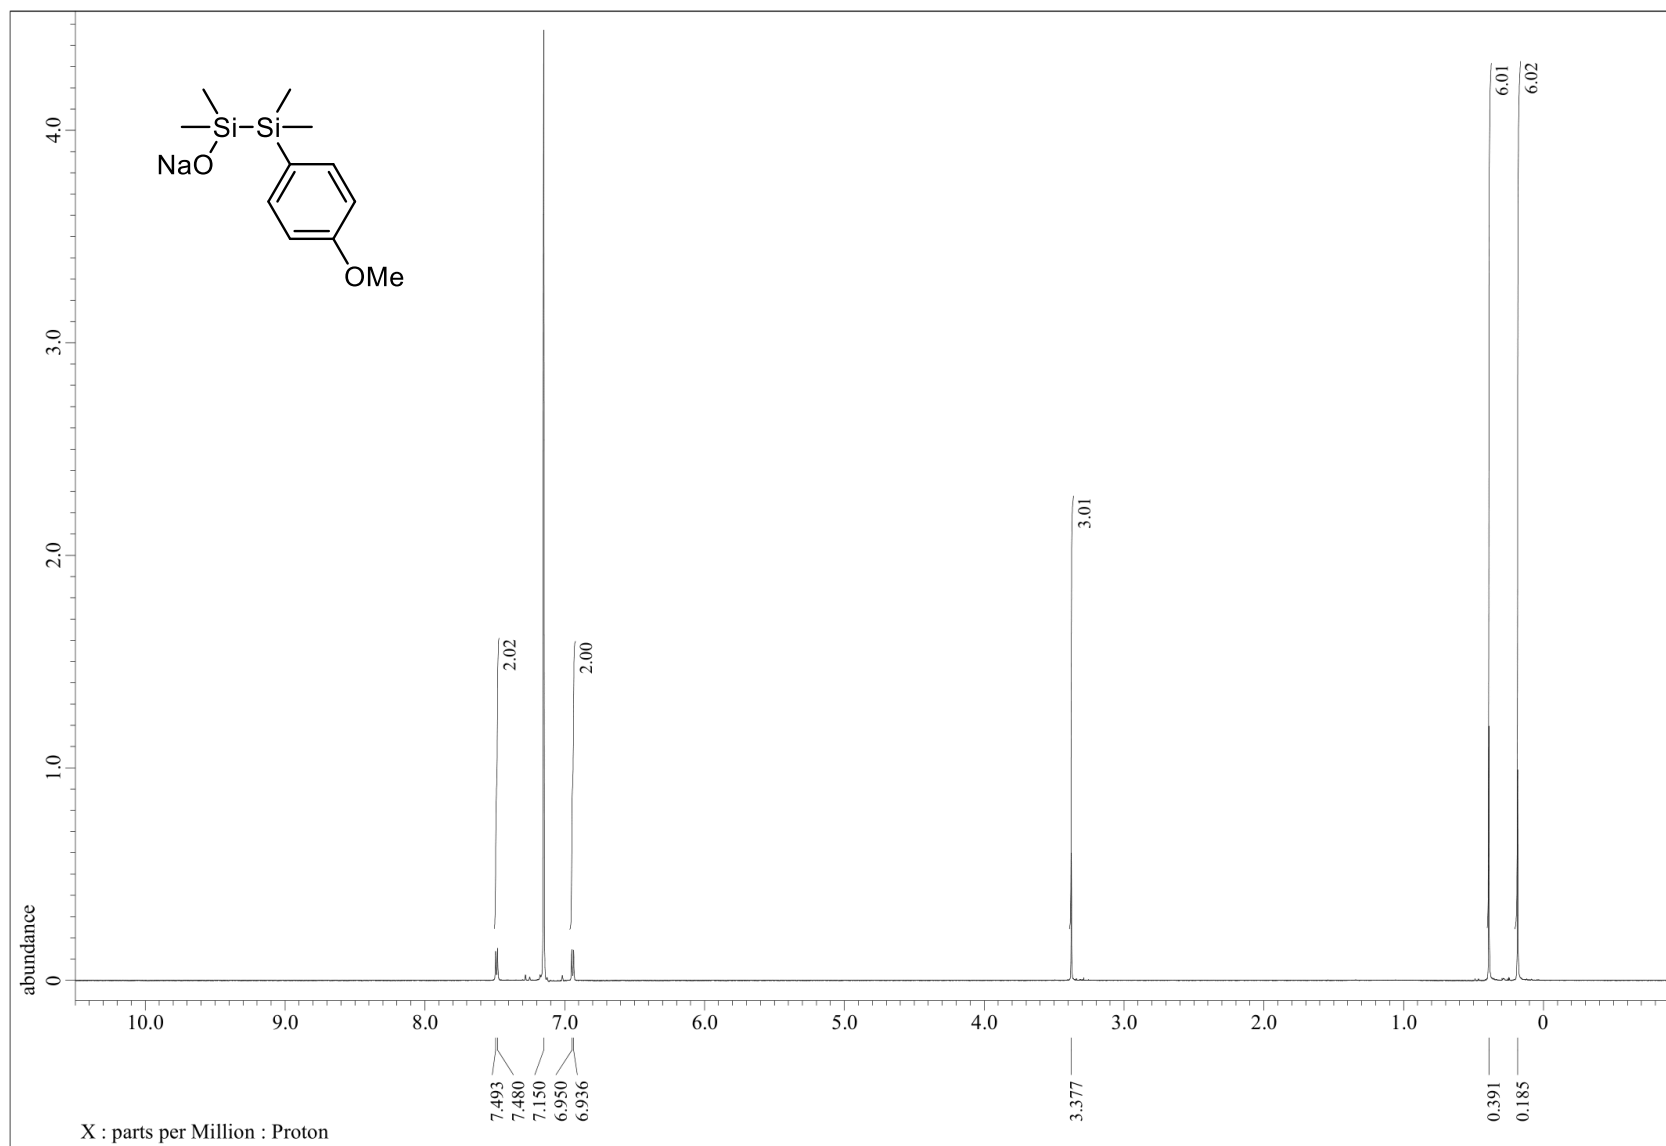

Figure S21.  $^1\text{H}$  NMR (600 MHz,  $\text{C}_6\text{D}_6$ ) spectrum of 1-Ans

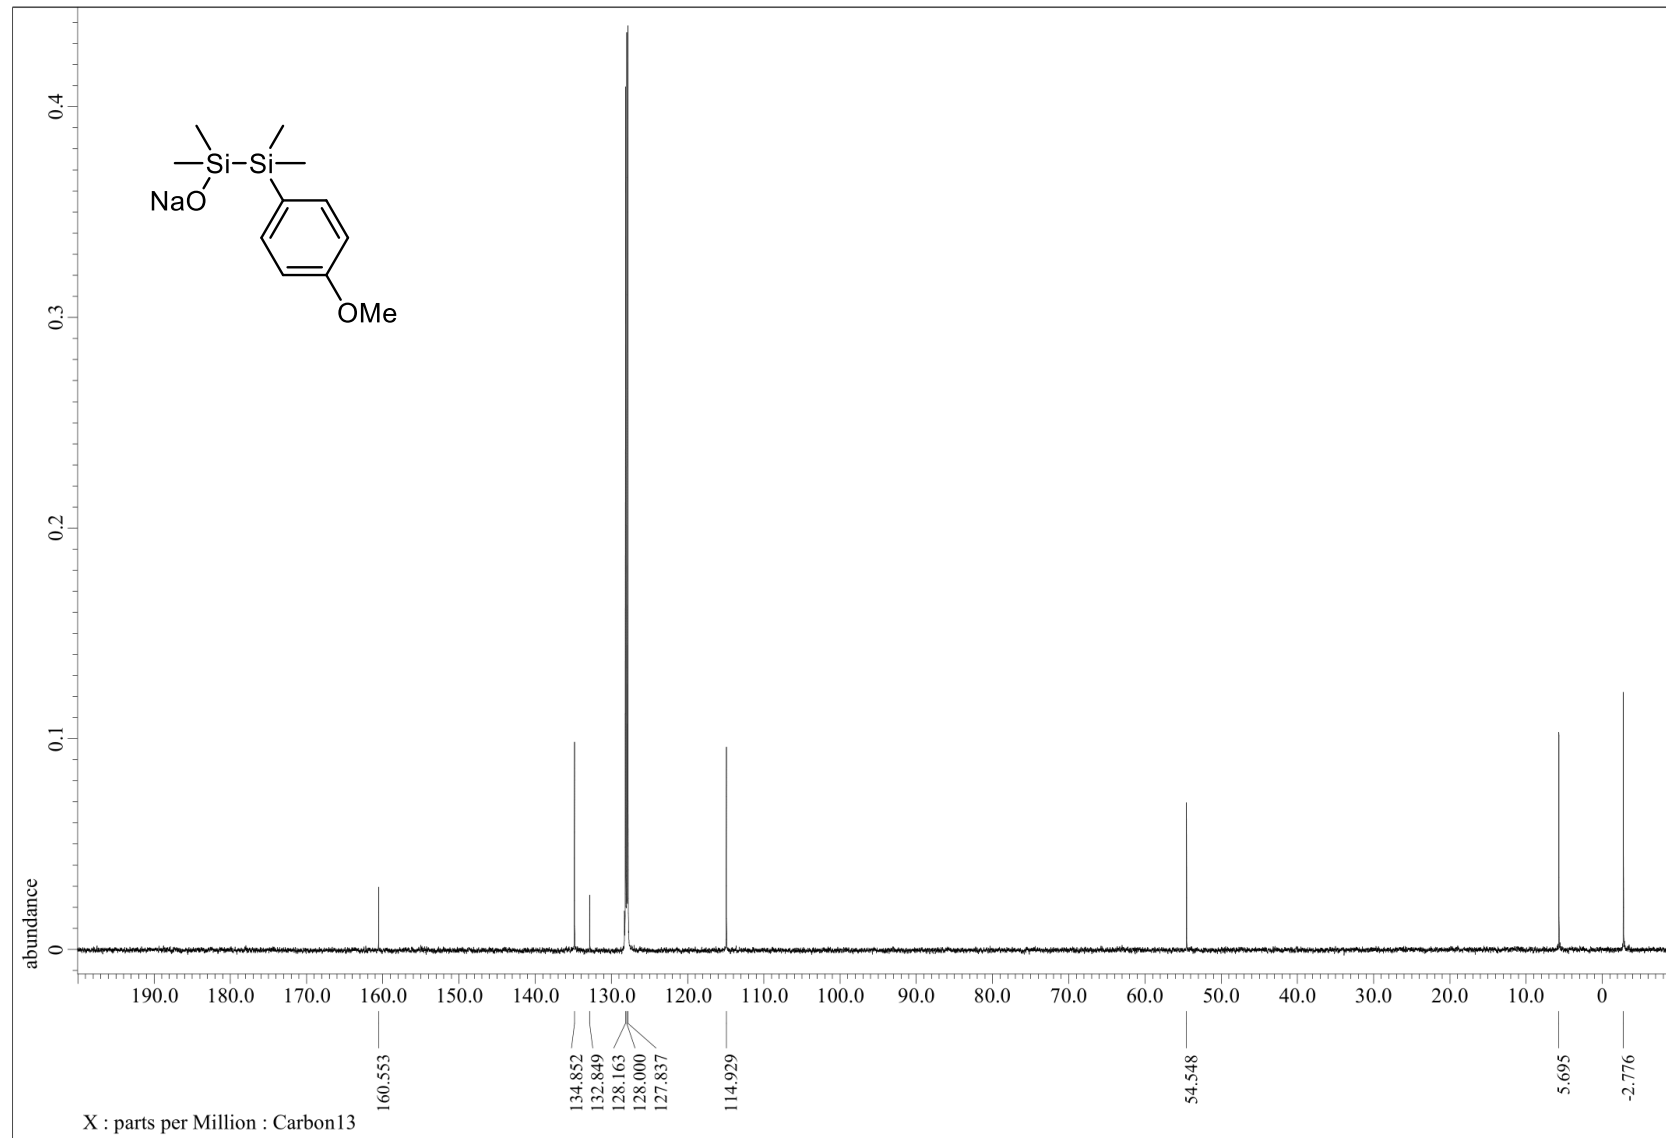

**Figure S22.**  $^{13}\text{C}$  NMR (151 MHz,  $\text{C}_6\text{D}_6$ ) spectrum of **1-Ans**

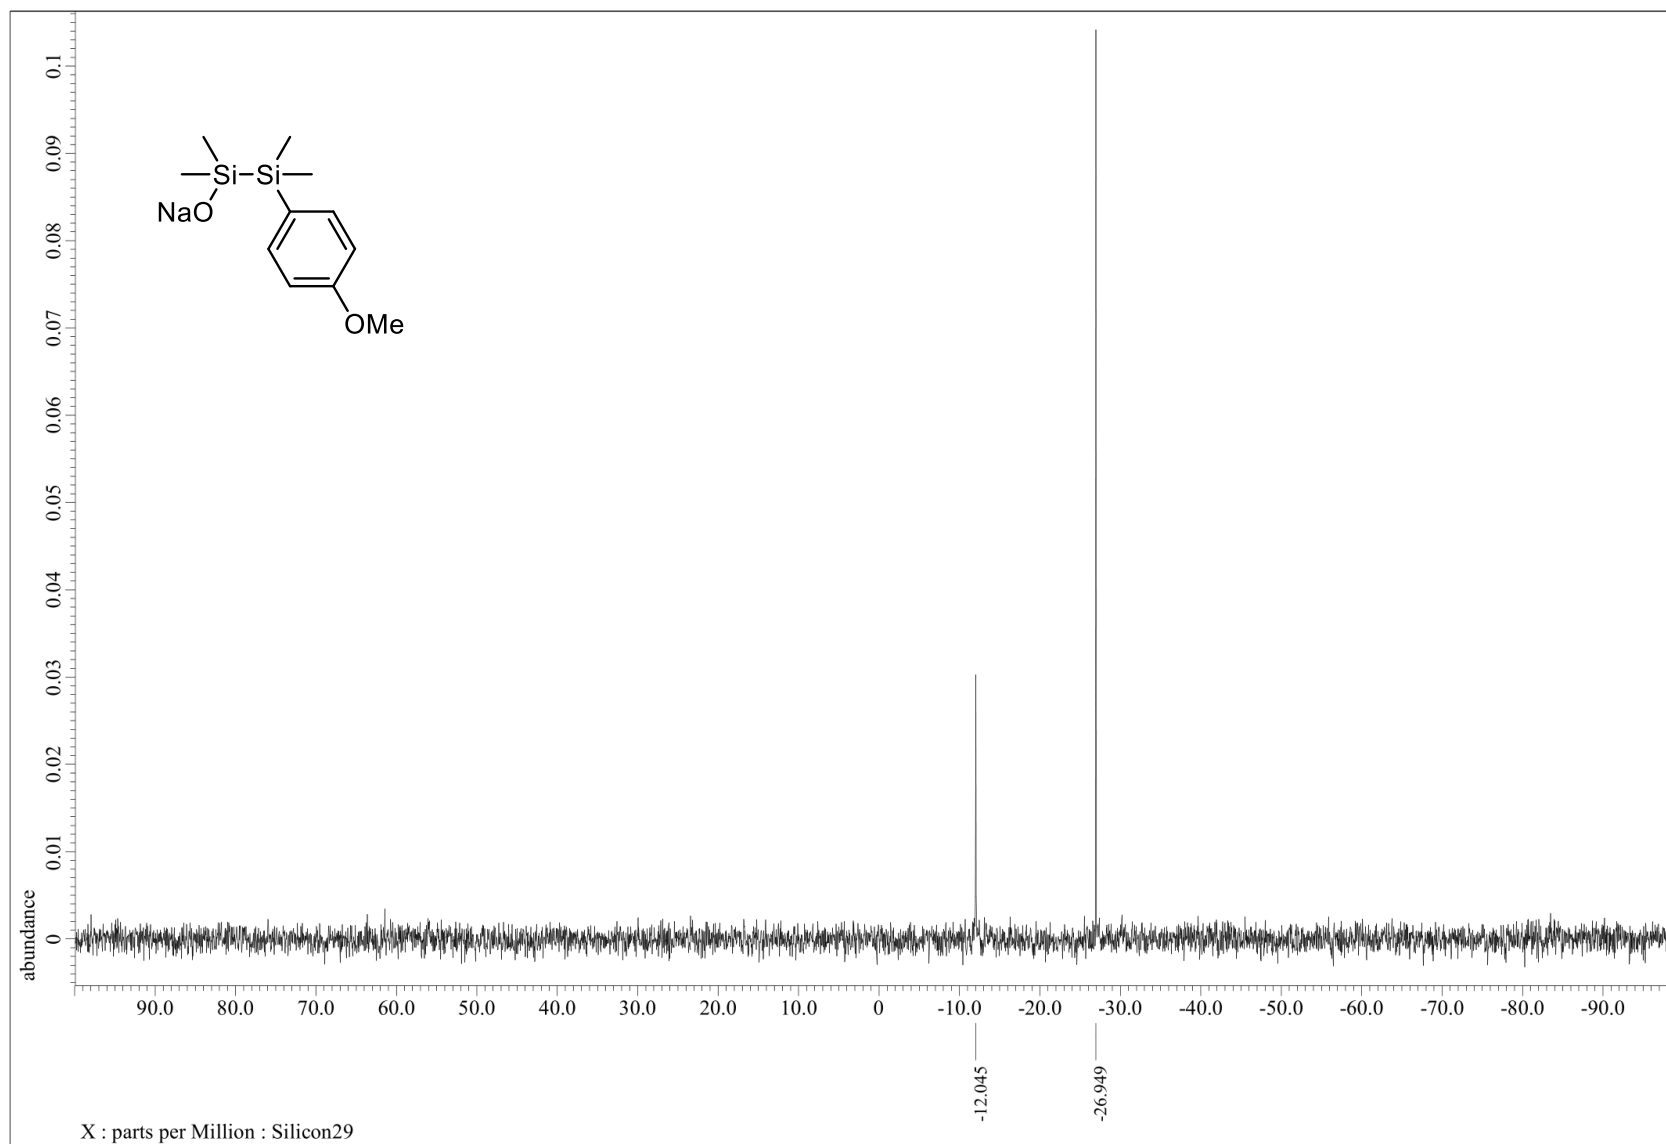

**Figure S23.**  $^{29}\text{Si}$  NMR (119 MHz,  $\text{C}_6\text{D}_6$ ) spectrum of **1-Ans**

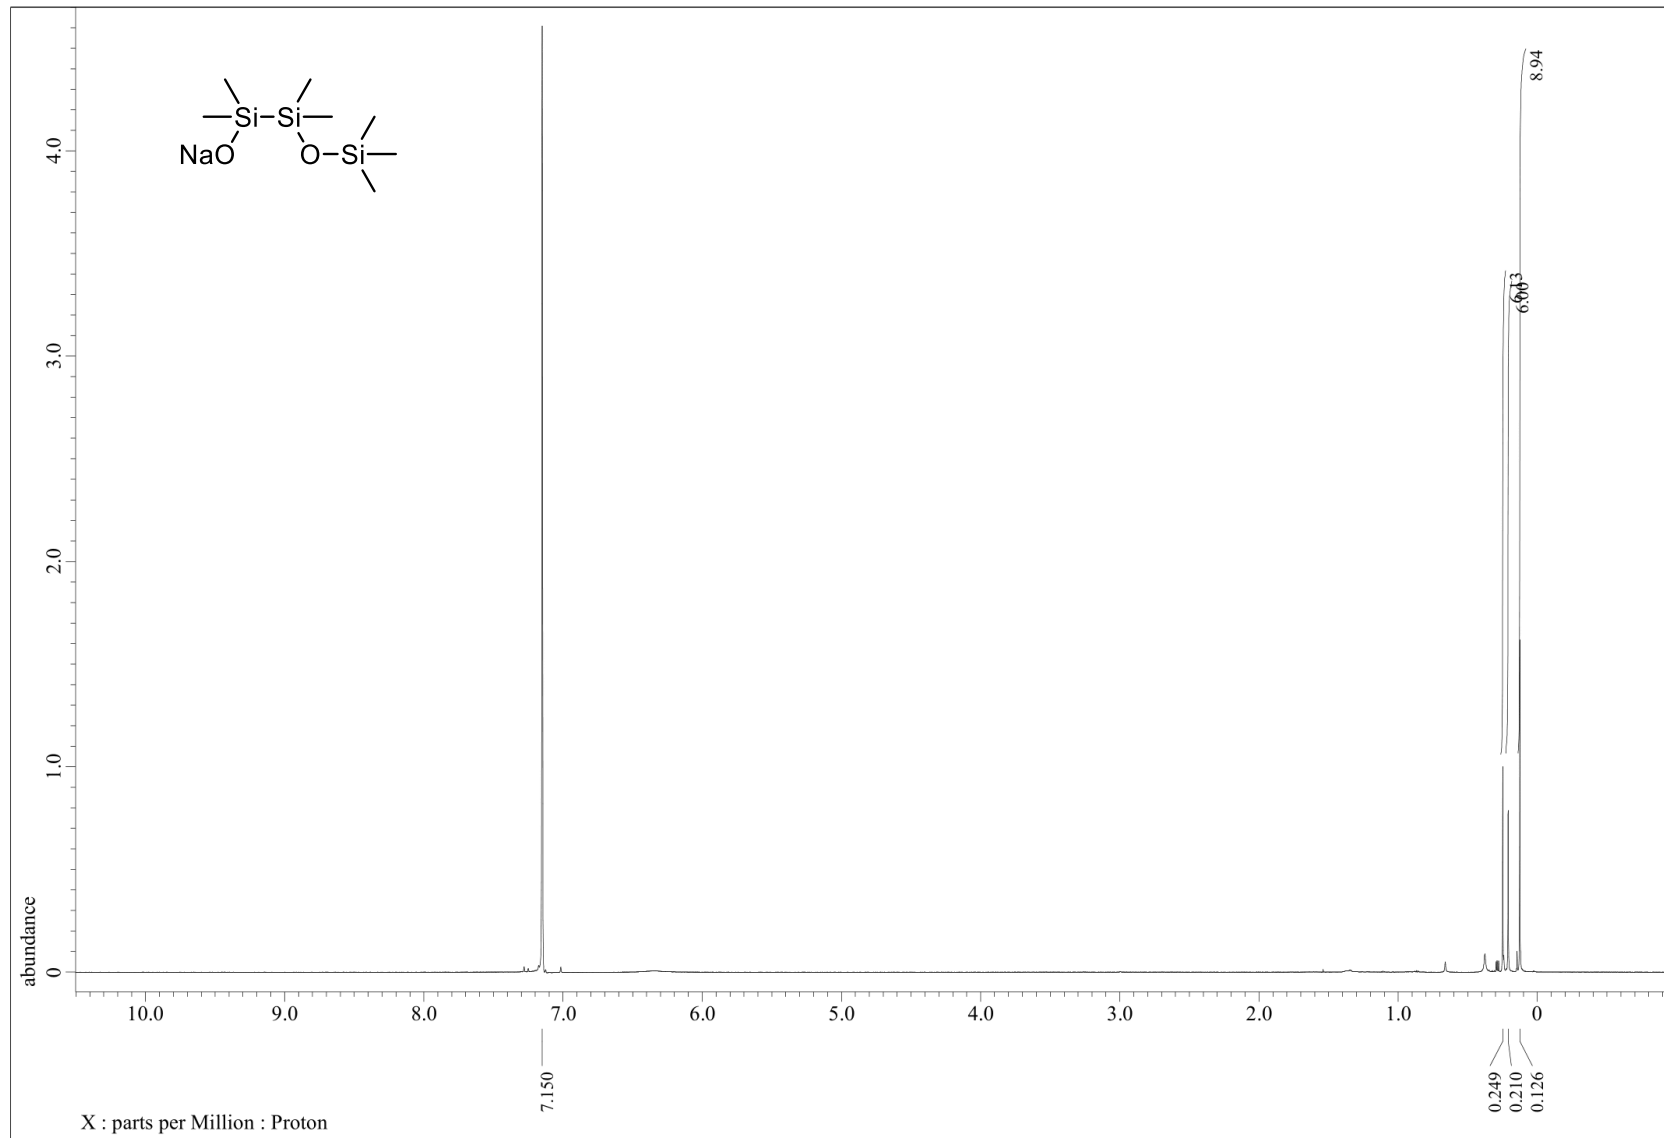

**Figure S24.**  $^1\text{H}$  NMR (600 MHz,  $\text{C}_6\text{D}_6$ ) spectrum of 1-OSiMe<sub>3</sub>

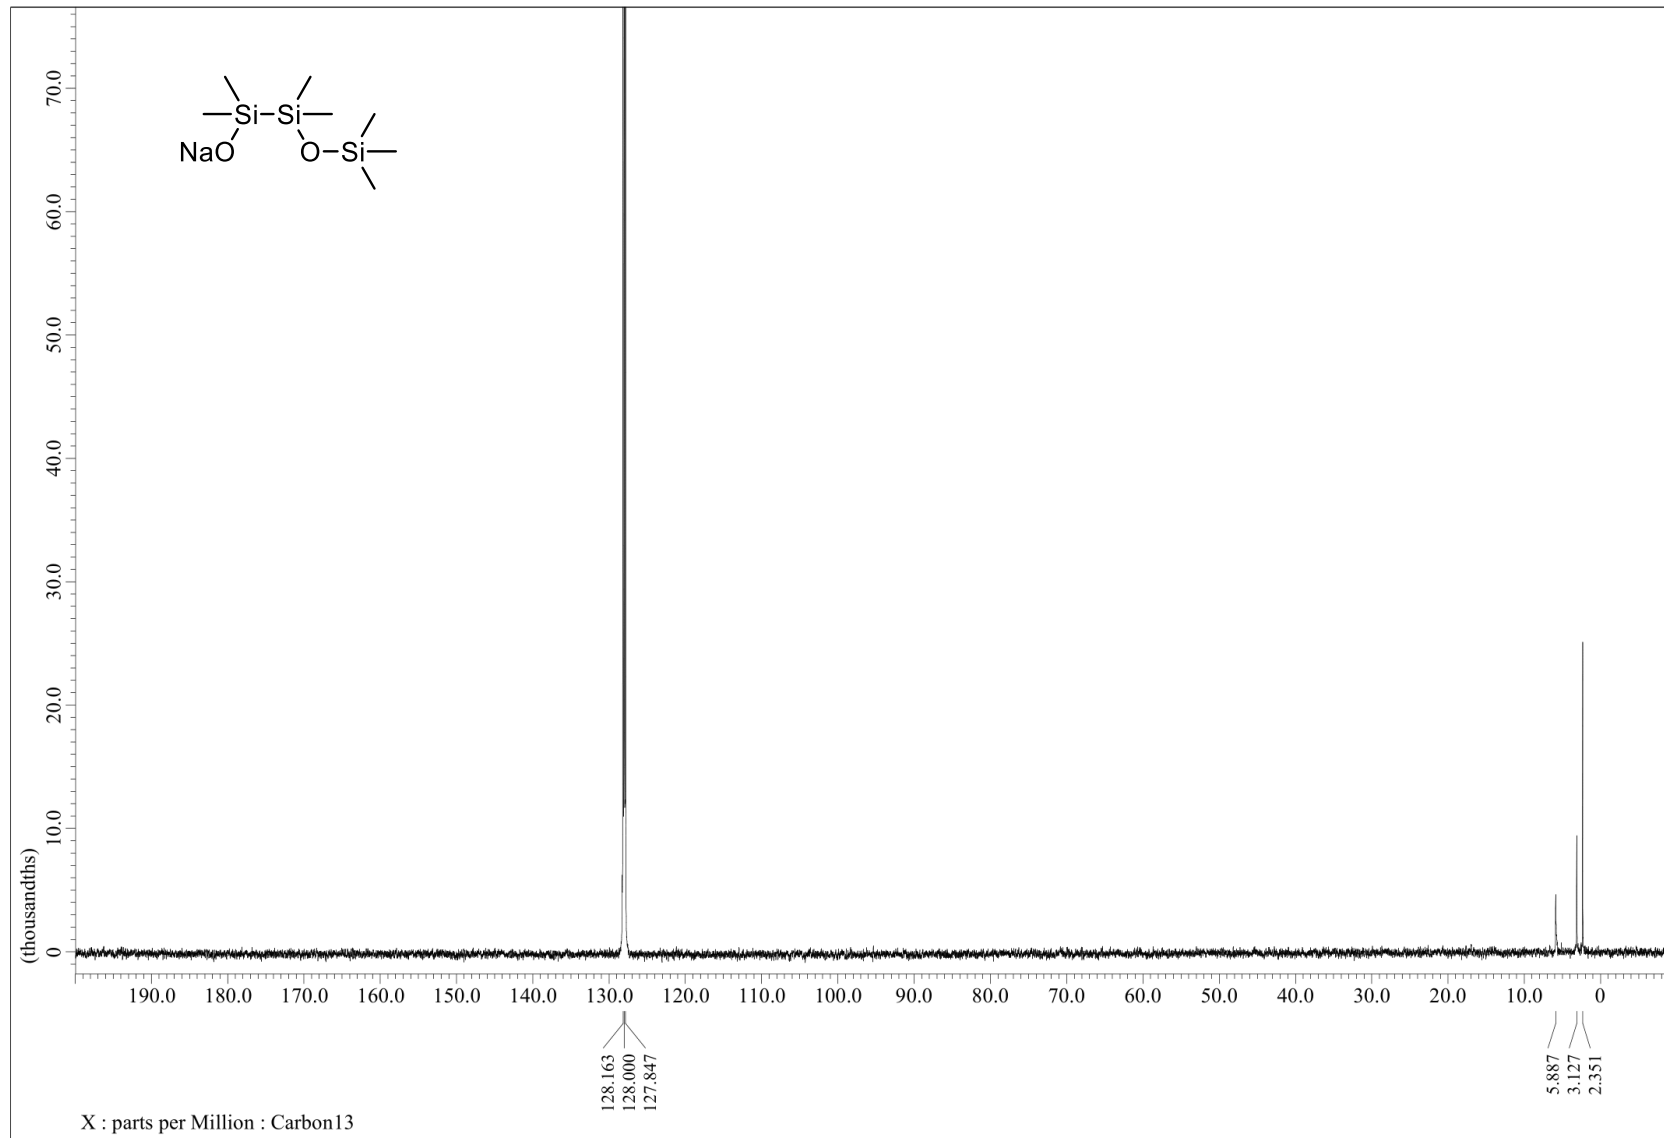

Figure S25.  $^{13}\text{C}$  NMR (151 MHz,  $\text{C}_6\text{D}_6$ ) spectrum of 1-OSiMe<sub>3</sub>

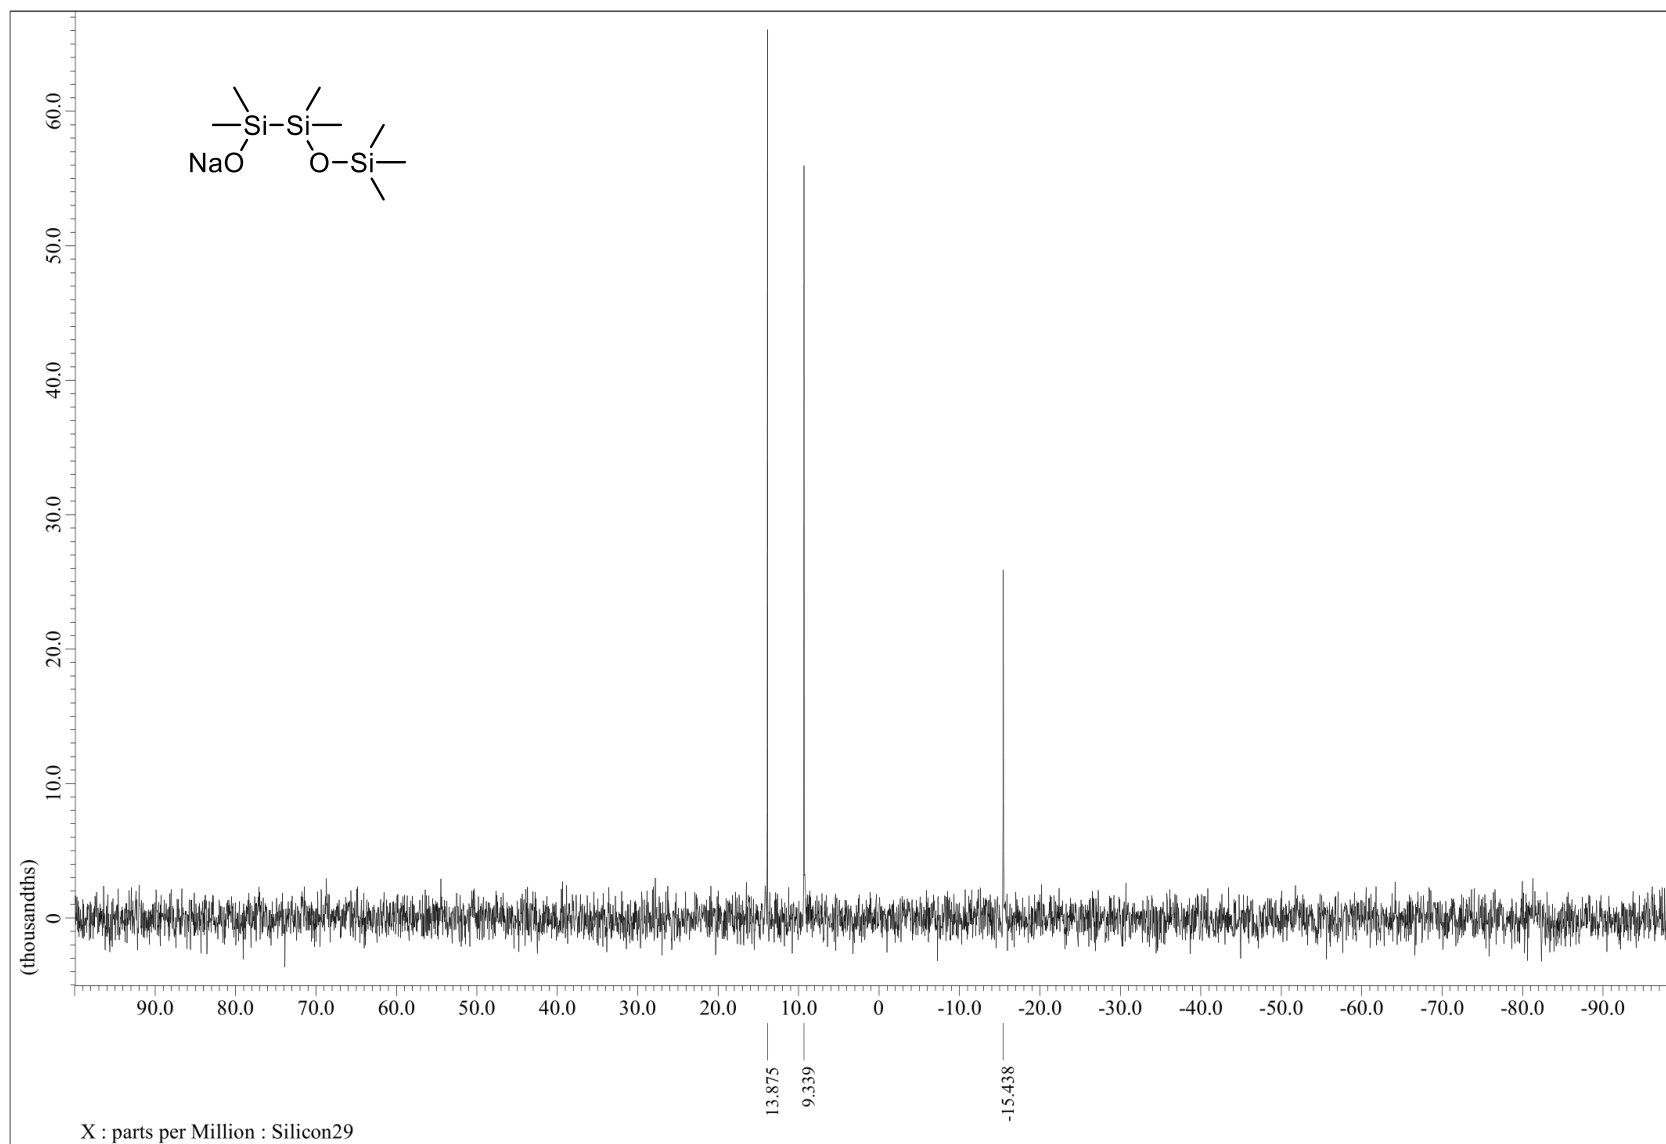

**Figure S26.**  $^{29}\text{Si}$  NMR (119 MHz,  $\text{C}_6\text{D}_6$ ) spectrum of **1-OSiMe<sub>3</sub>**

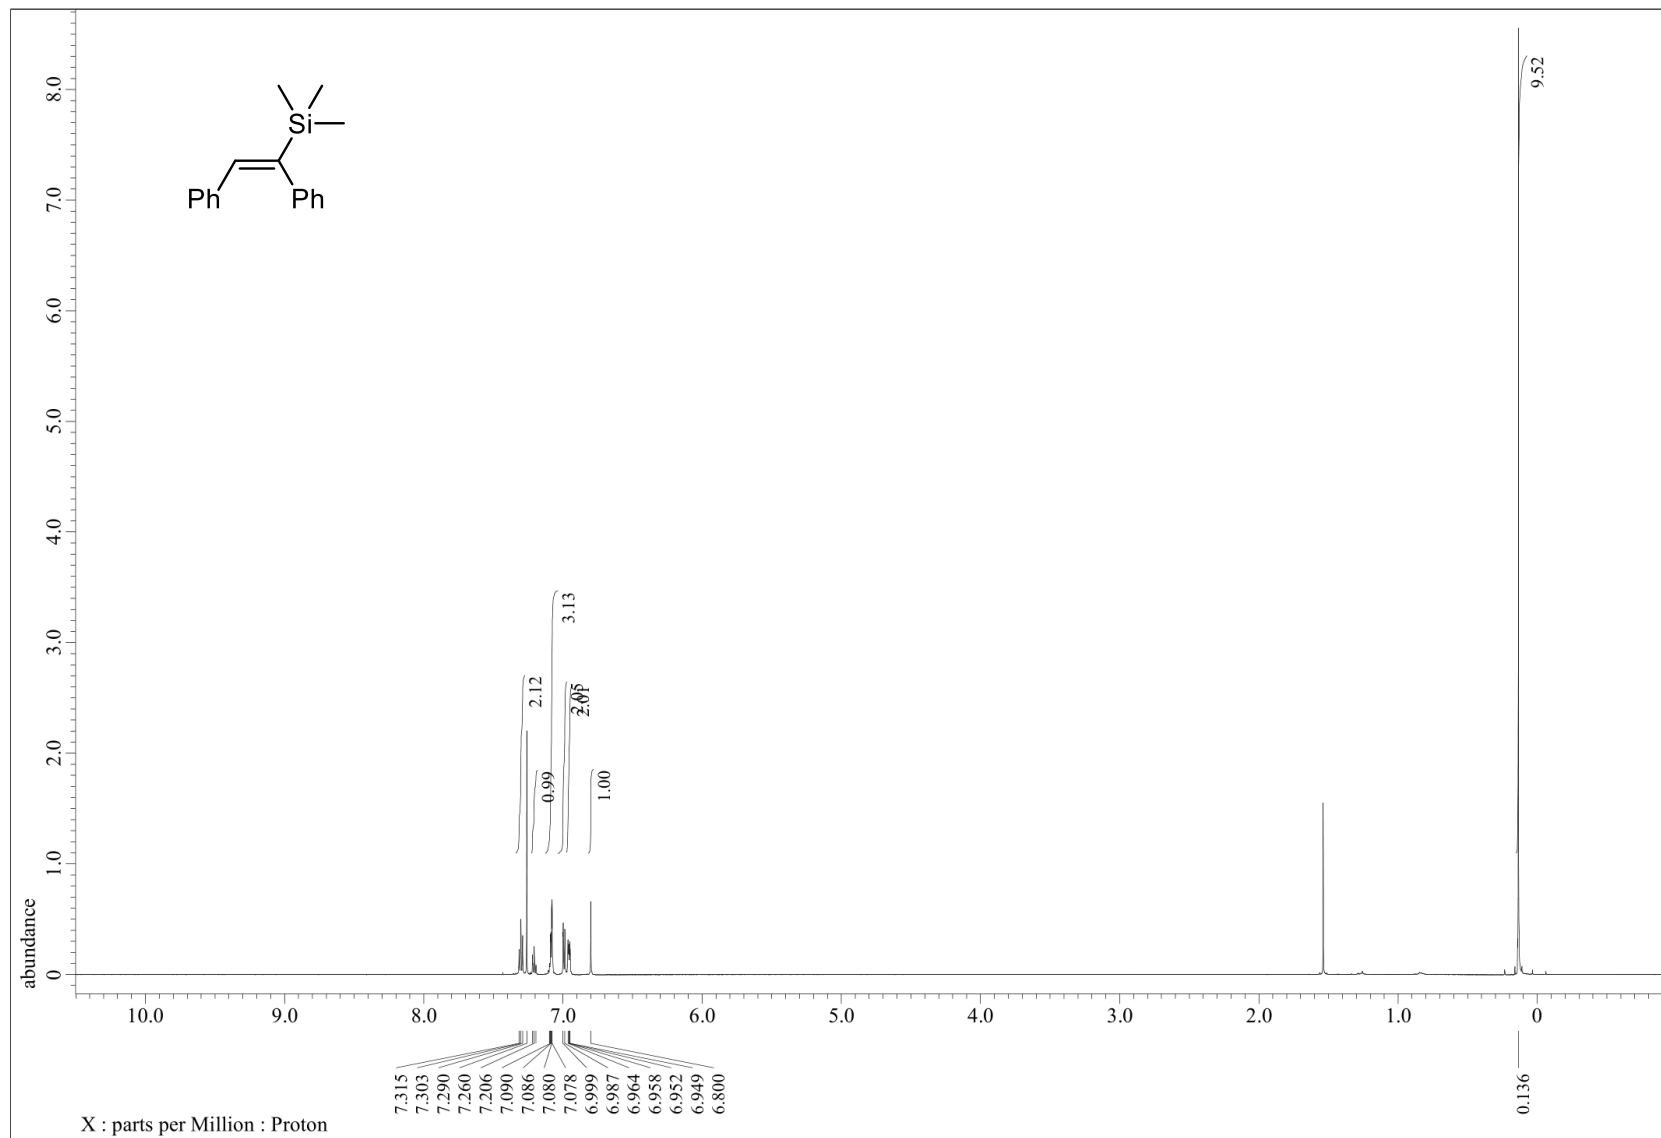

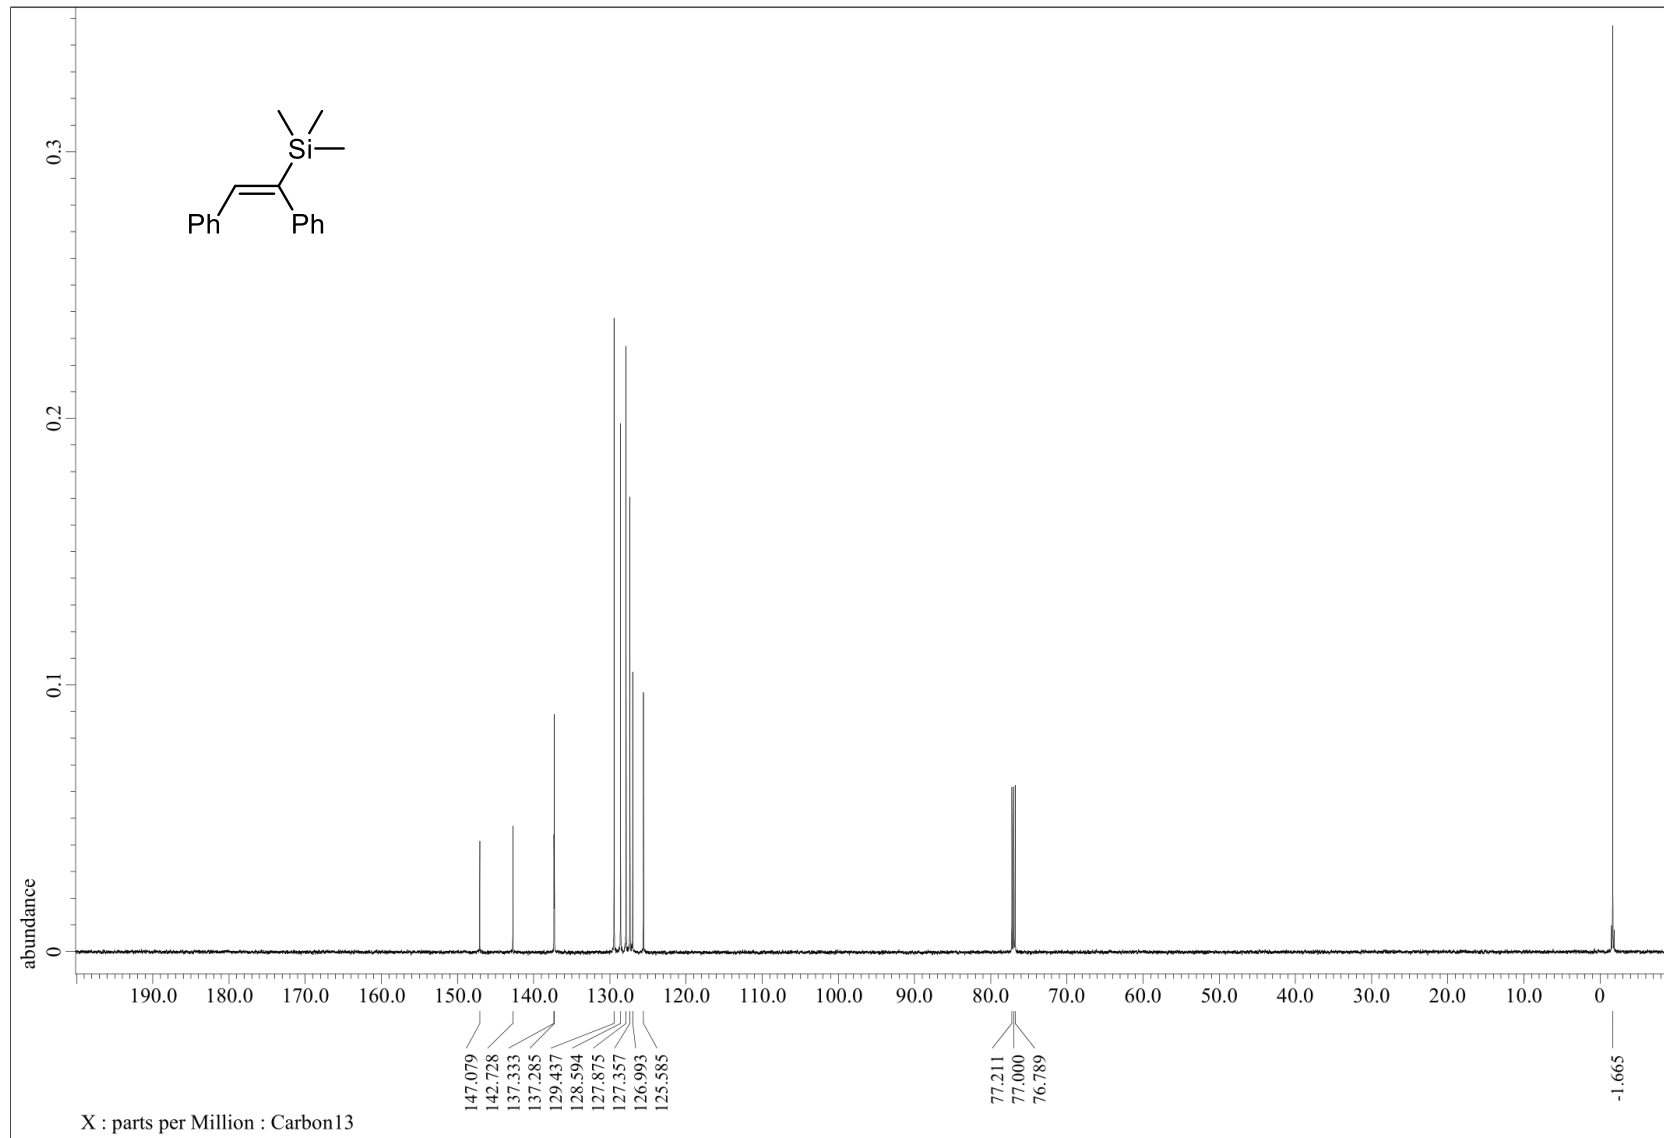



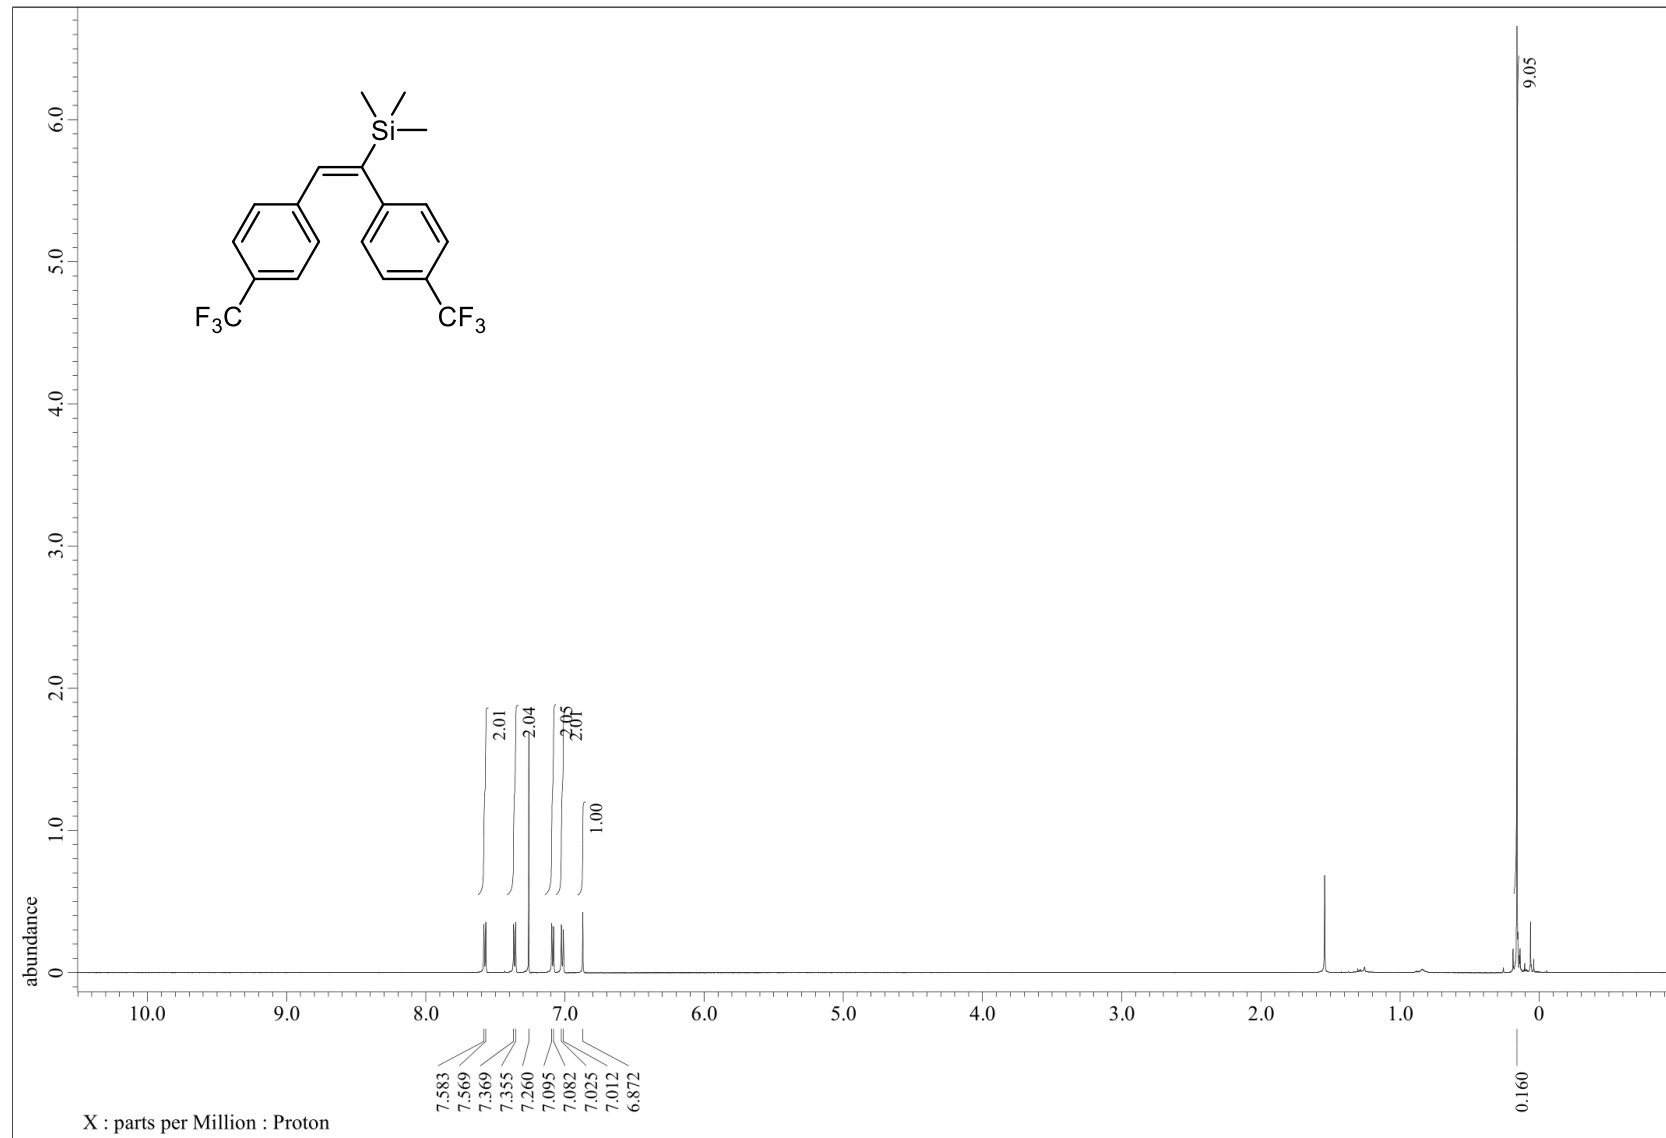

**Figure S29.**  $^1\text{H}$  NMR (600 MHz,  $\text{CDCl}_3$ ) spectrum of **3b**

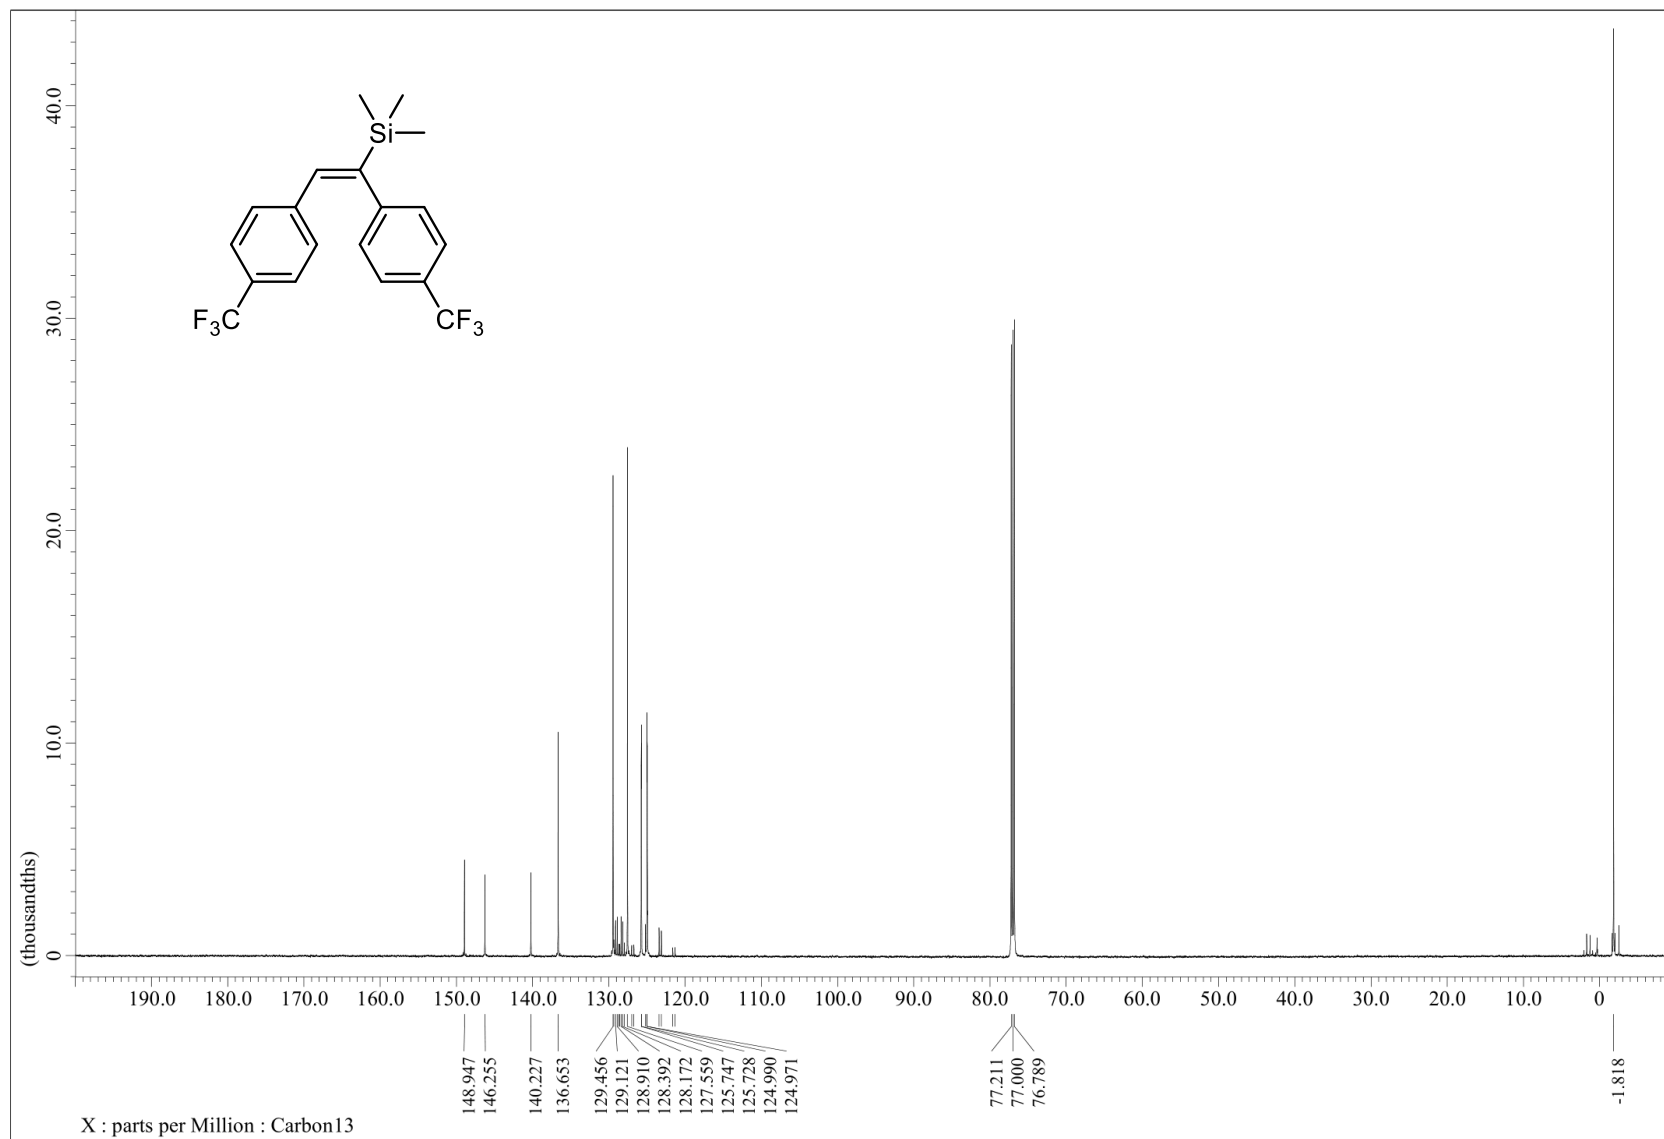

Figure S30.  $^{13}\text{C}$  NMR (151 MHz,  $\text{CDCl}_3$ ) spectrum of **3b**

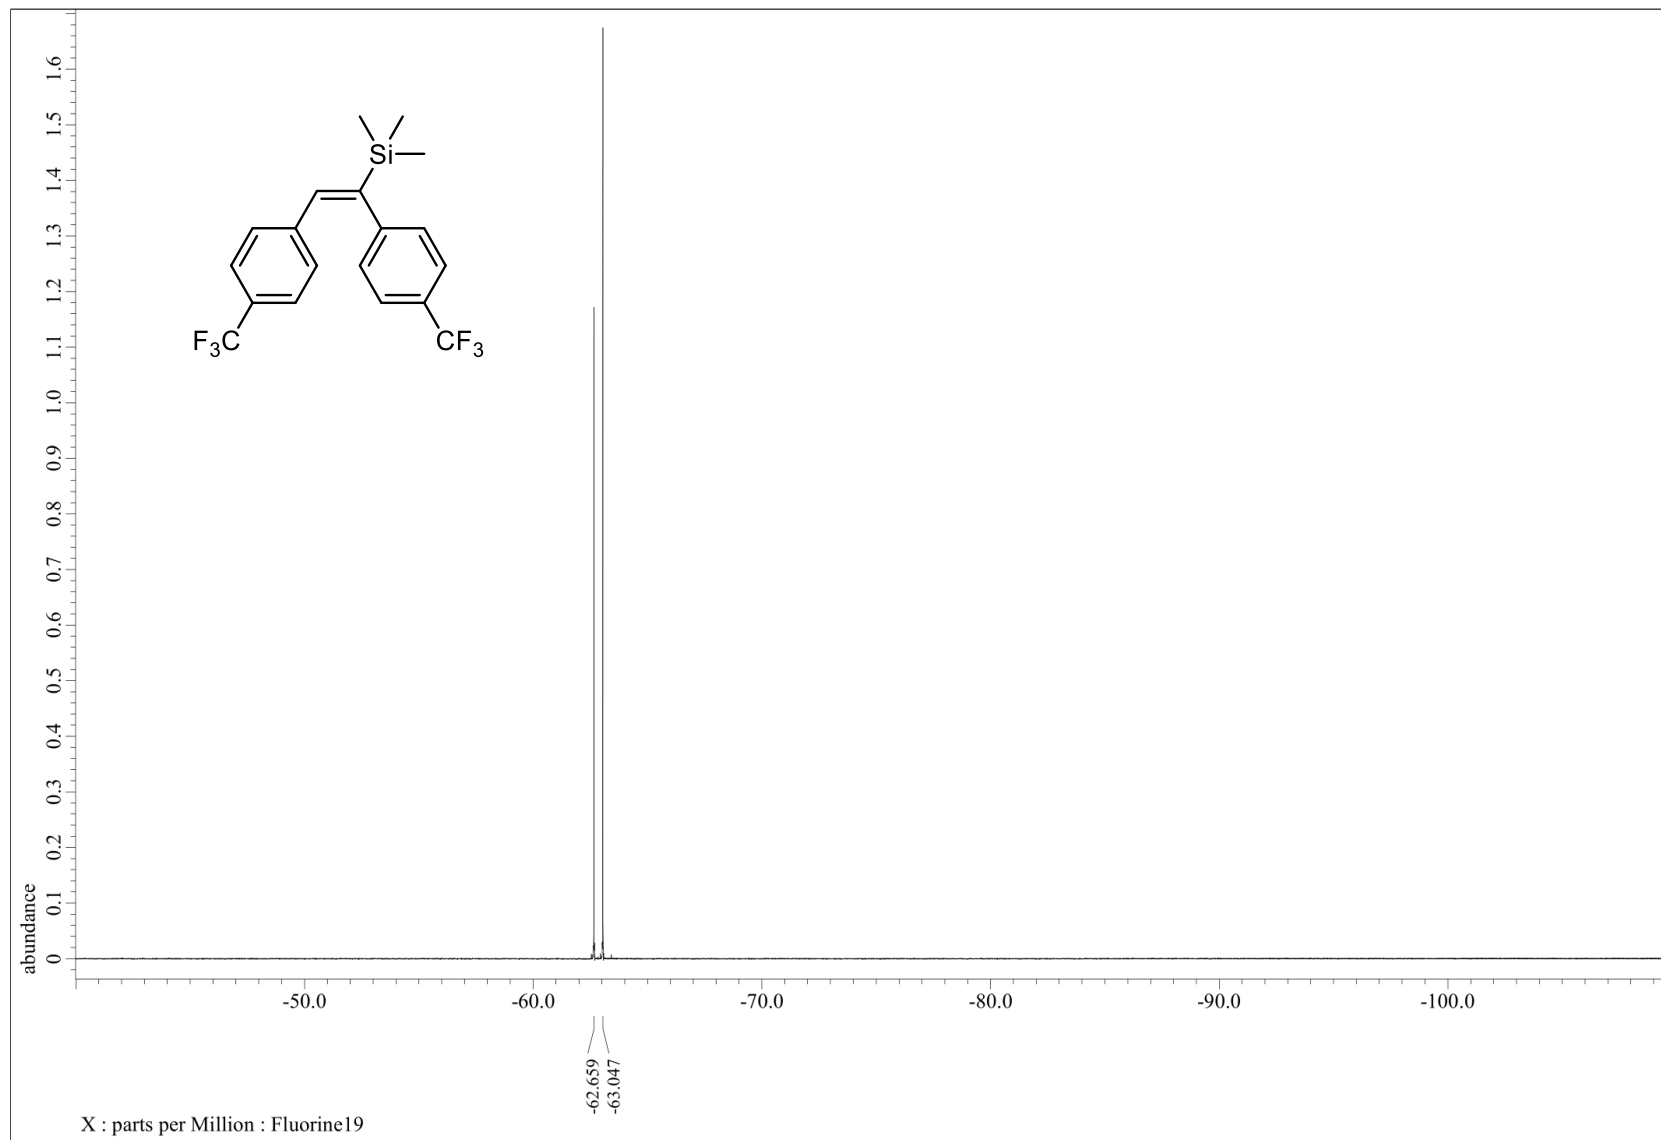

**Figure S31.**  $^{19}\text{F}$  NMR (564 MHz,  $\text{CDCl}_3$ ) spectrum of **3b**

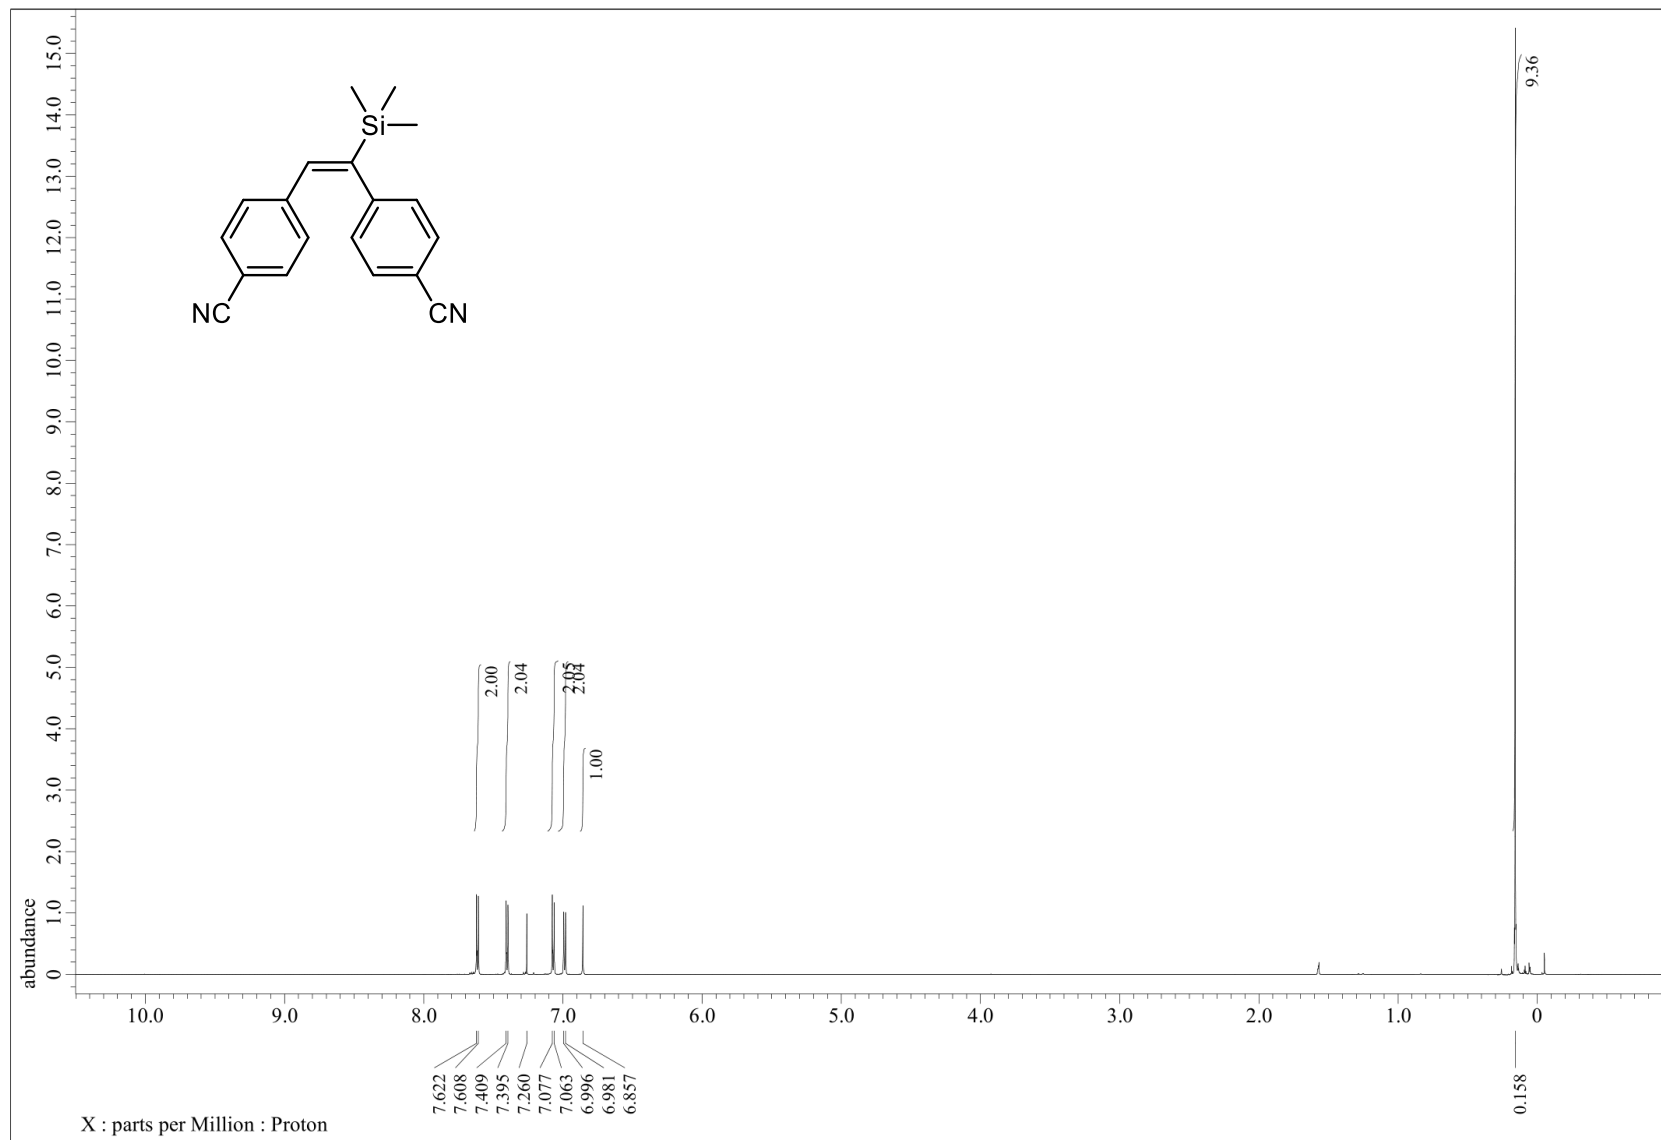

Figure S32. <sup>1</sup>H NMR (600 MHz, CDCl<sub>3</sub>) spectrum of **3c**

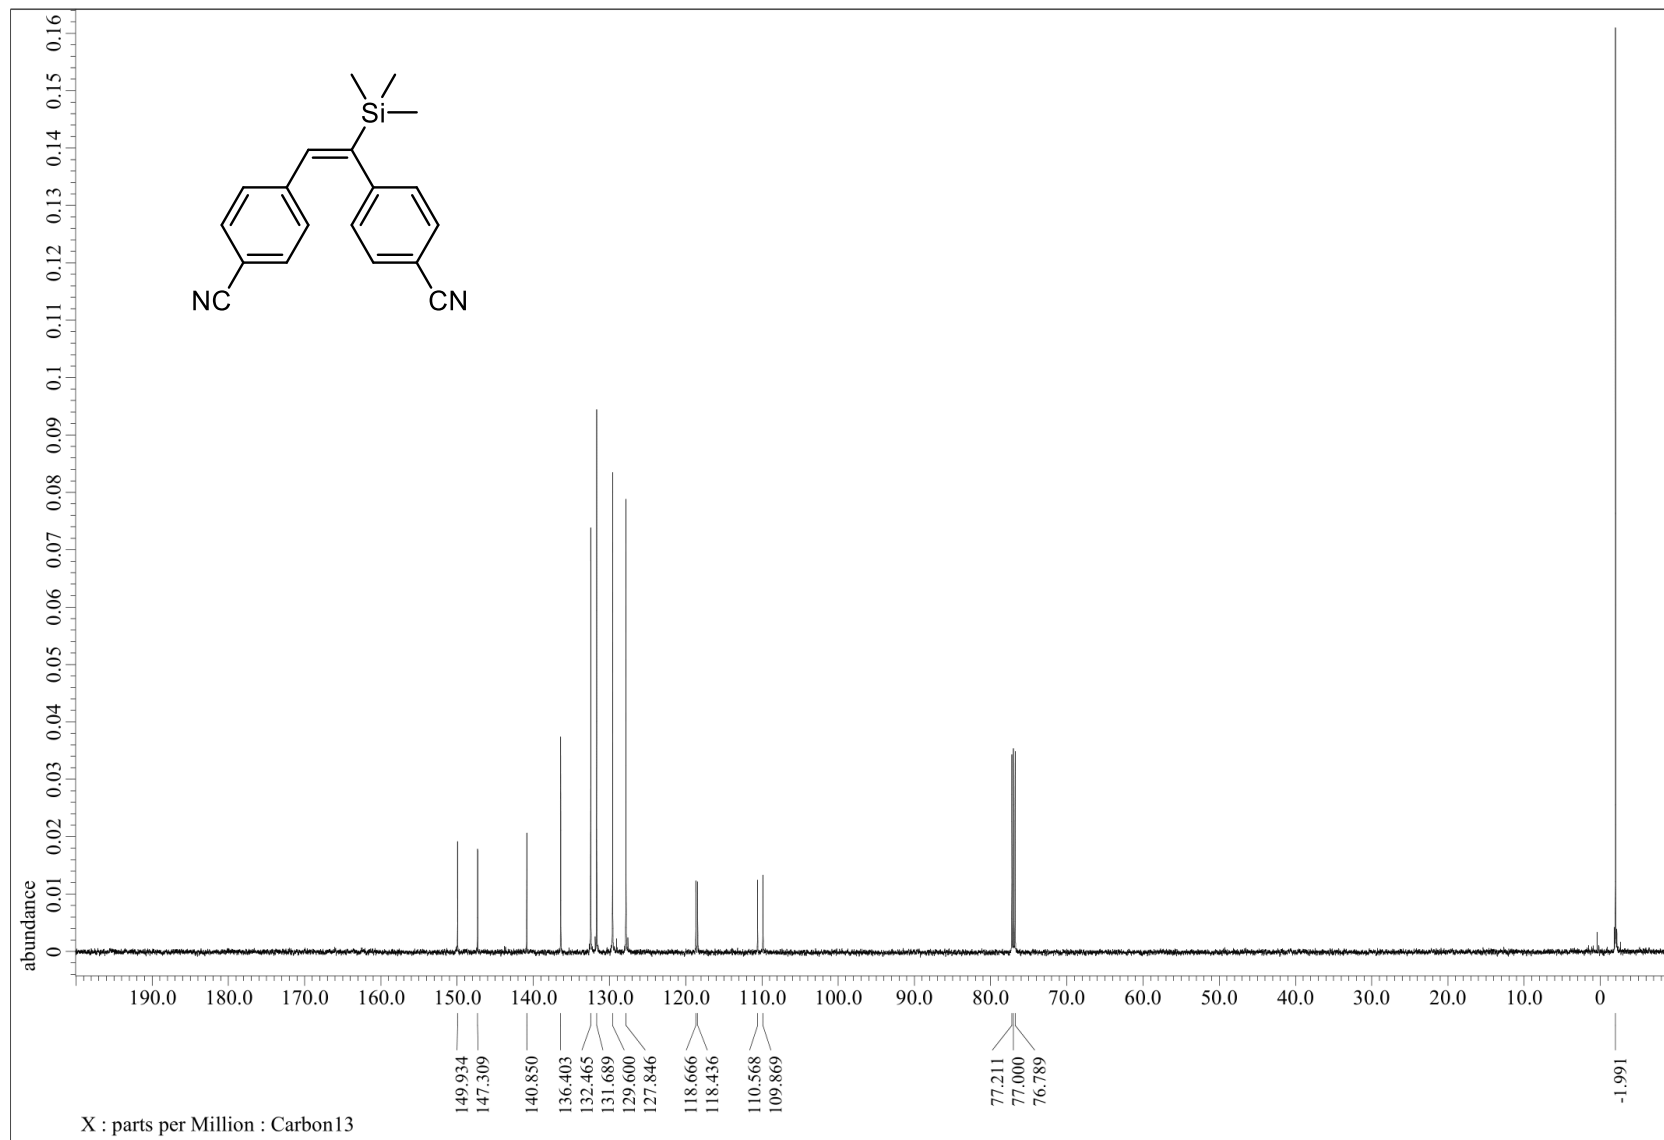

Figure S33. <sup>13</sup>C NMR (151 MHz, CDCl<sub>3</sub>) spectrum of **3c**

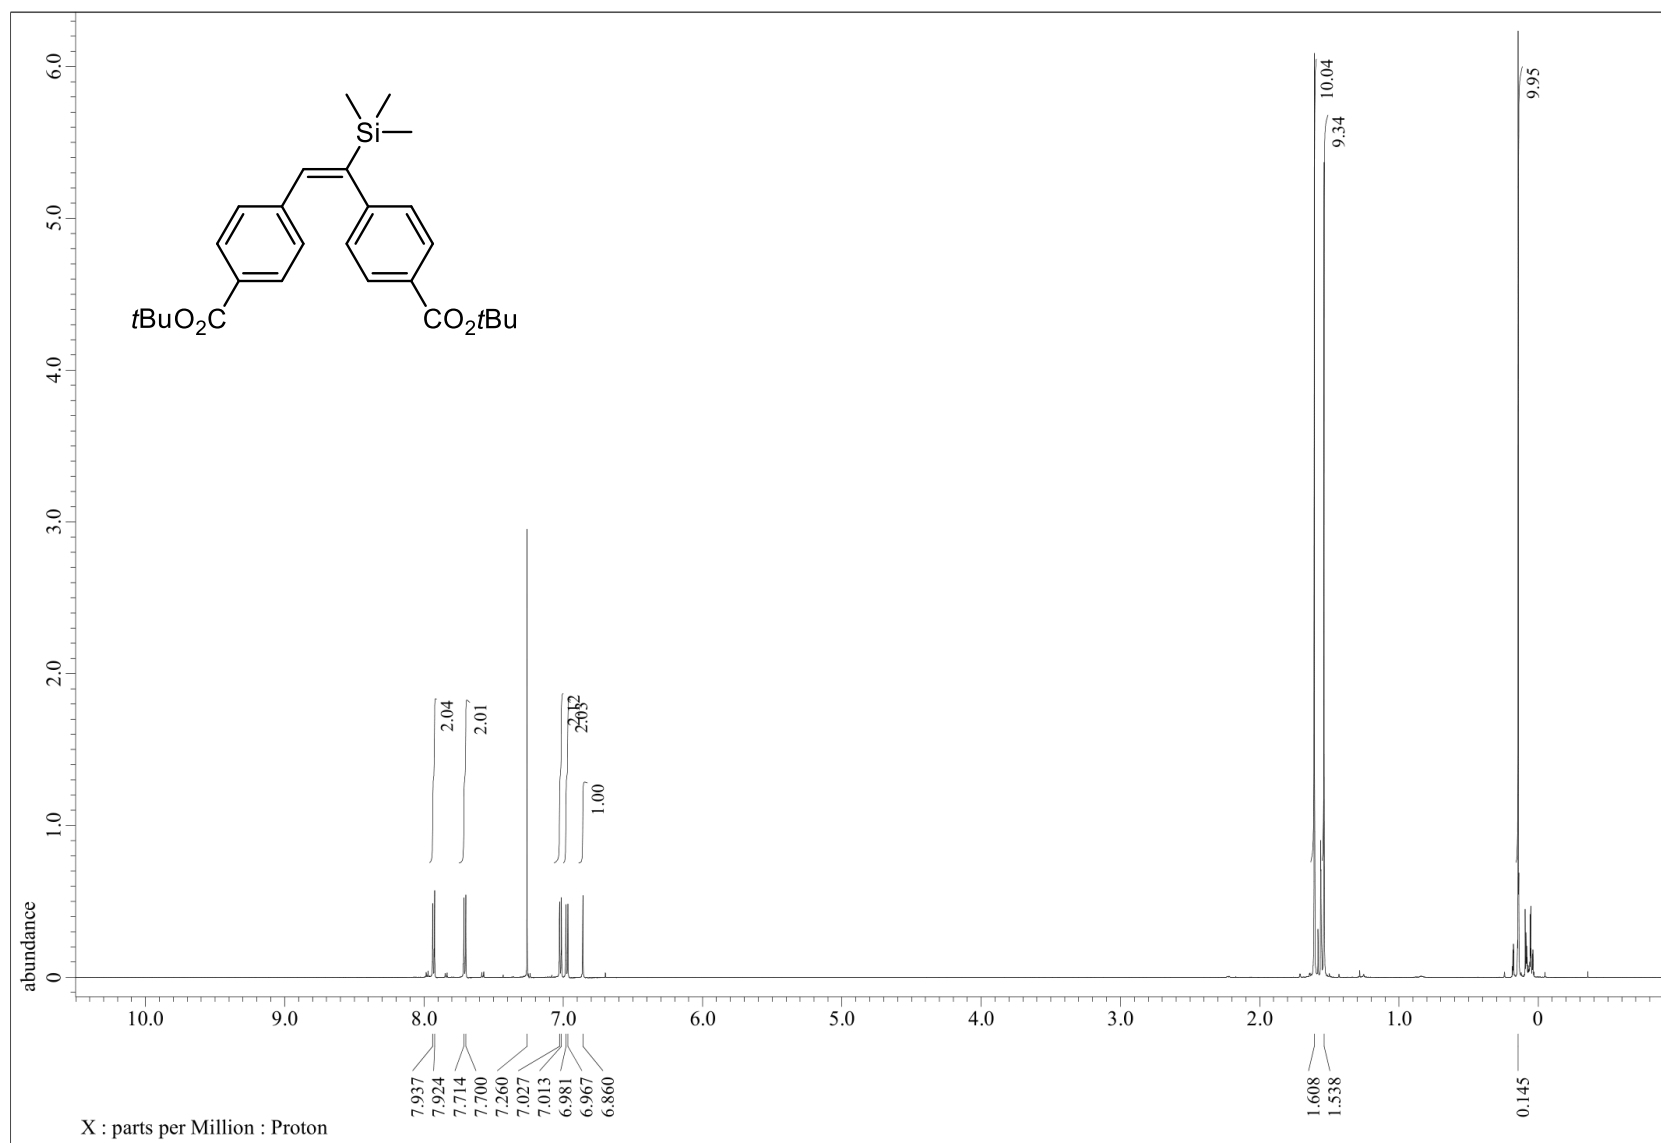

**Figure S34.** <sup>1</sup>H NMR (600 MHz, CDCl<sub>3</sub>) spectrum of **3d**

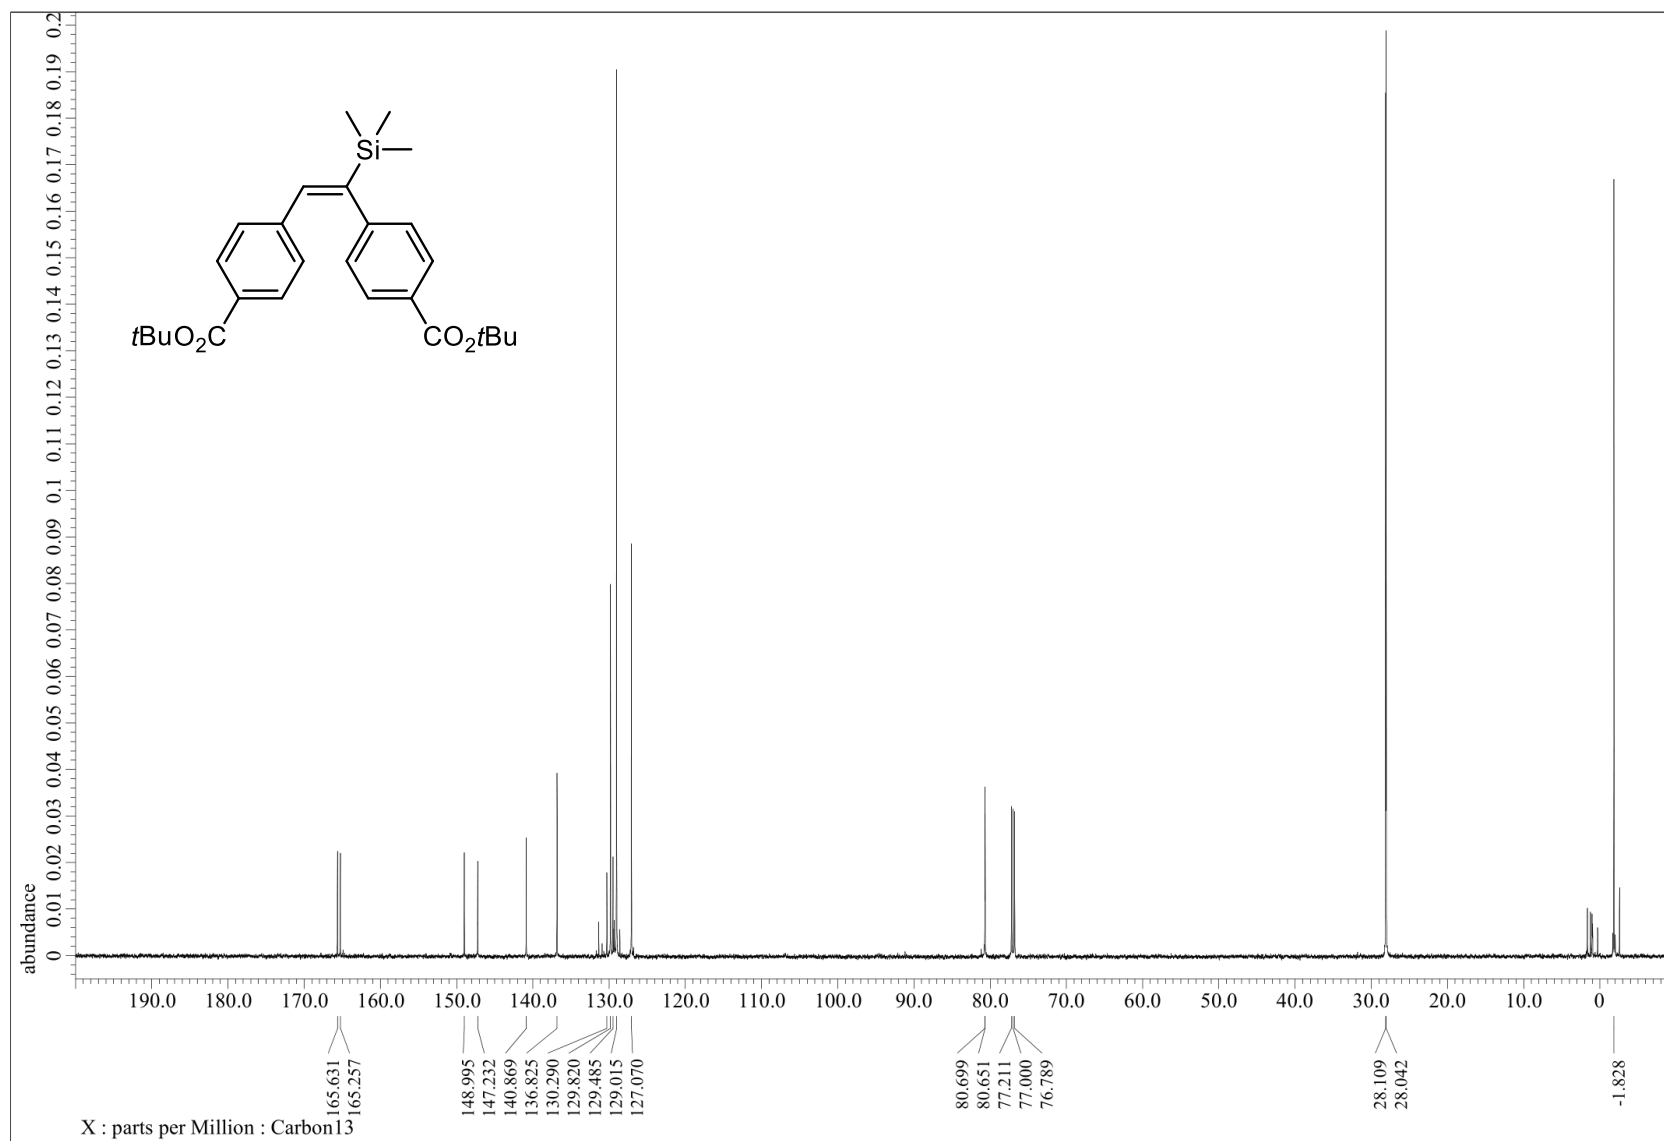

Figure S35. <sup>13</sup>C NMR (151 MHz, CDCl<sub>3</sub>) spectrum of **3d**

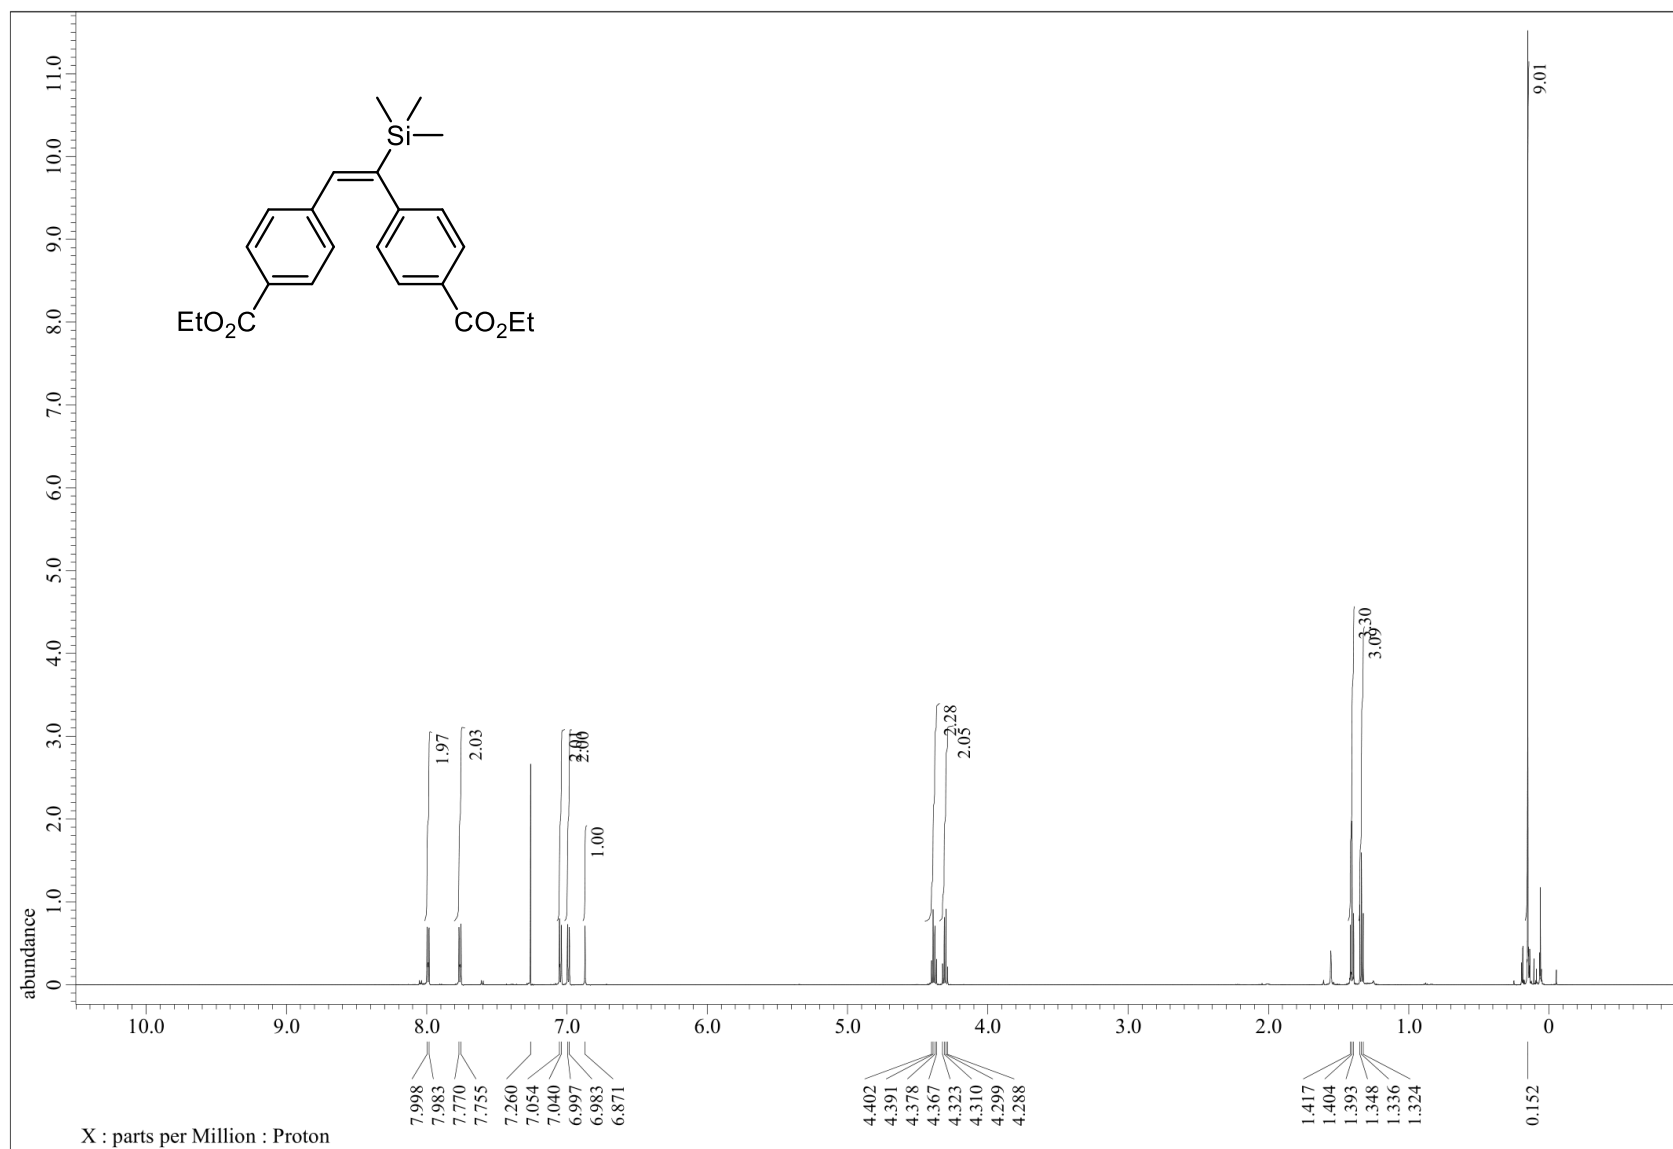

**Figure S36.** <sup>1</sup>H NMR (600 MHz, CDCl<sub>3</sub>) spectrum of **3e**



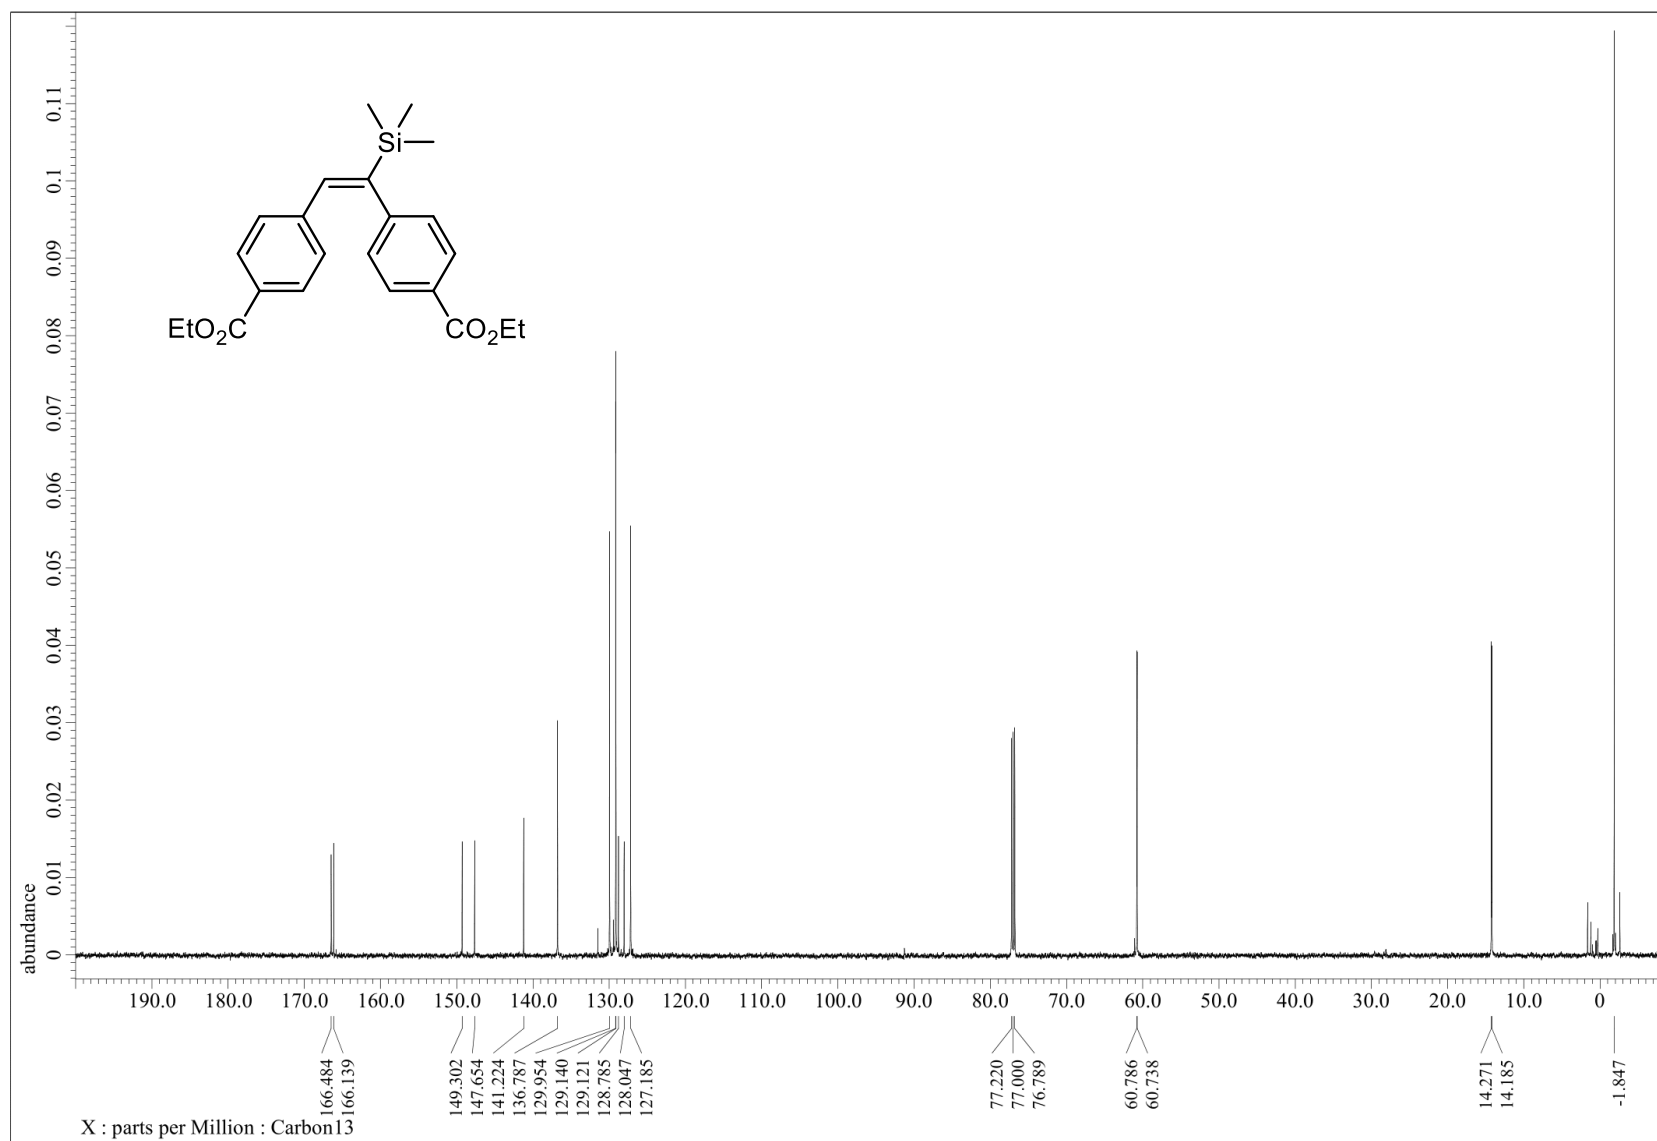

Figure S37. <sup>13</sup>C NMR (151 MHz, CDCl<sub>3</sub>) spectrum of **3e**

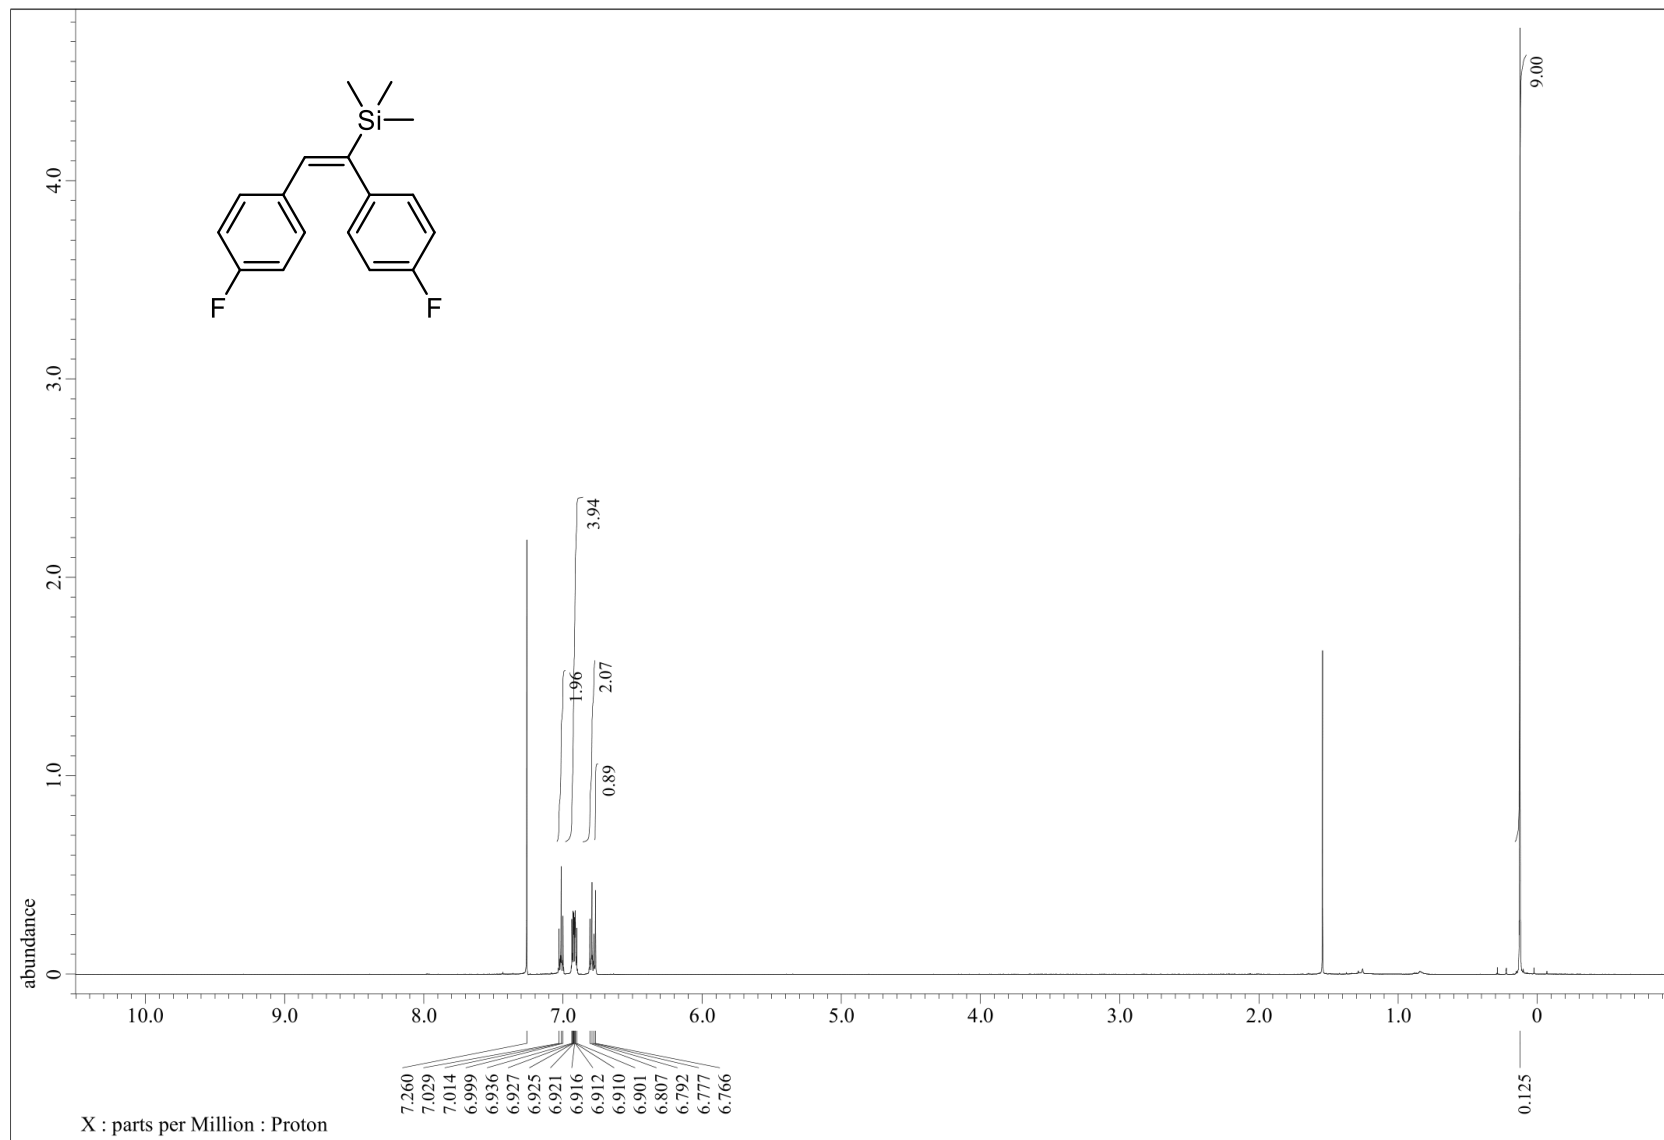

**Figure S38.** <sup>1</sup>H NMR (600 MHz, CDCl<sub>3</sub>) spectrum of **3f**

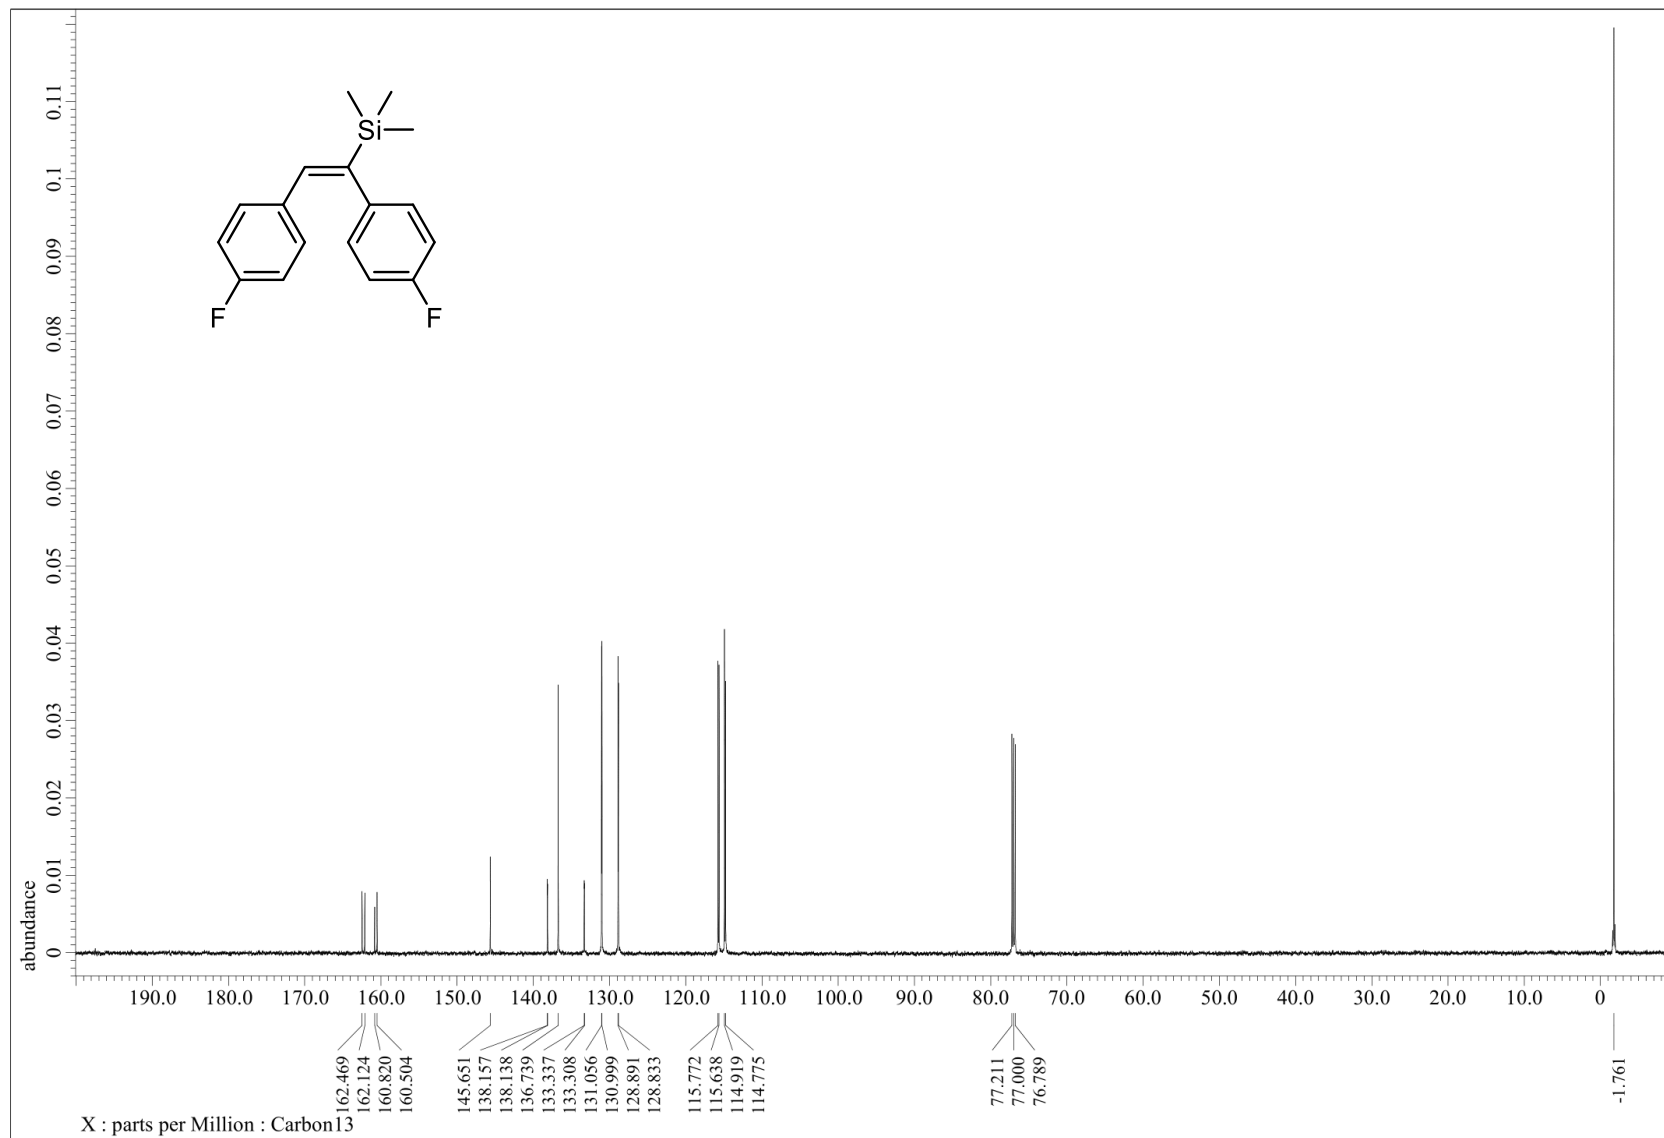

Figure S39. <sup>13</sup>C NMR (151 MHz, CDCl<sub>3</sub>) spectrum of **3f**

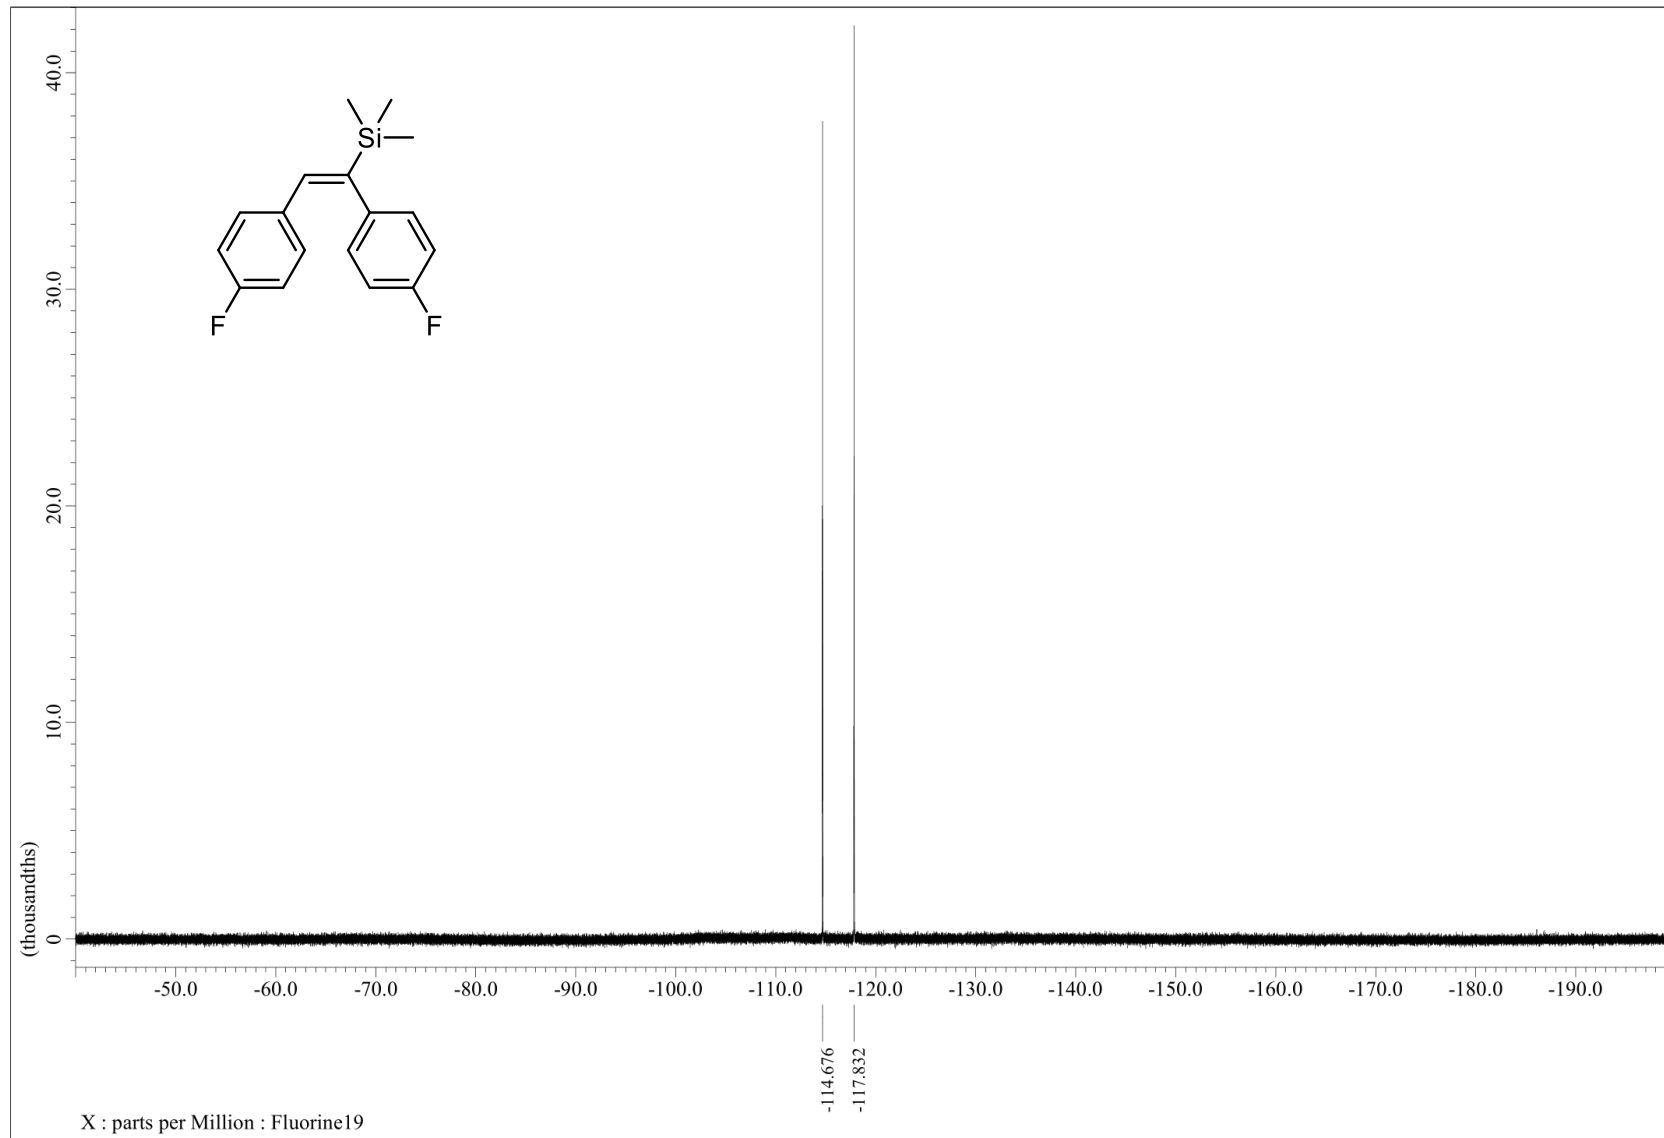

**Figure S40.**  $^{19}\text{F}$  NMR (564 MHz,  $\text{CDCl}_3$ ) spectrum of **3f**

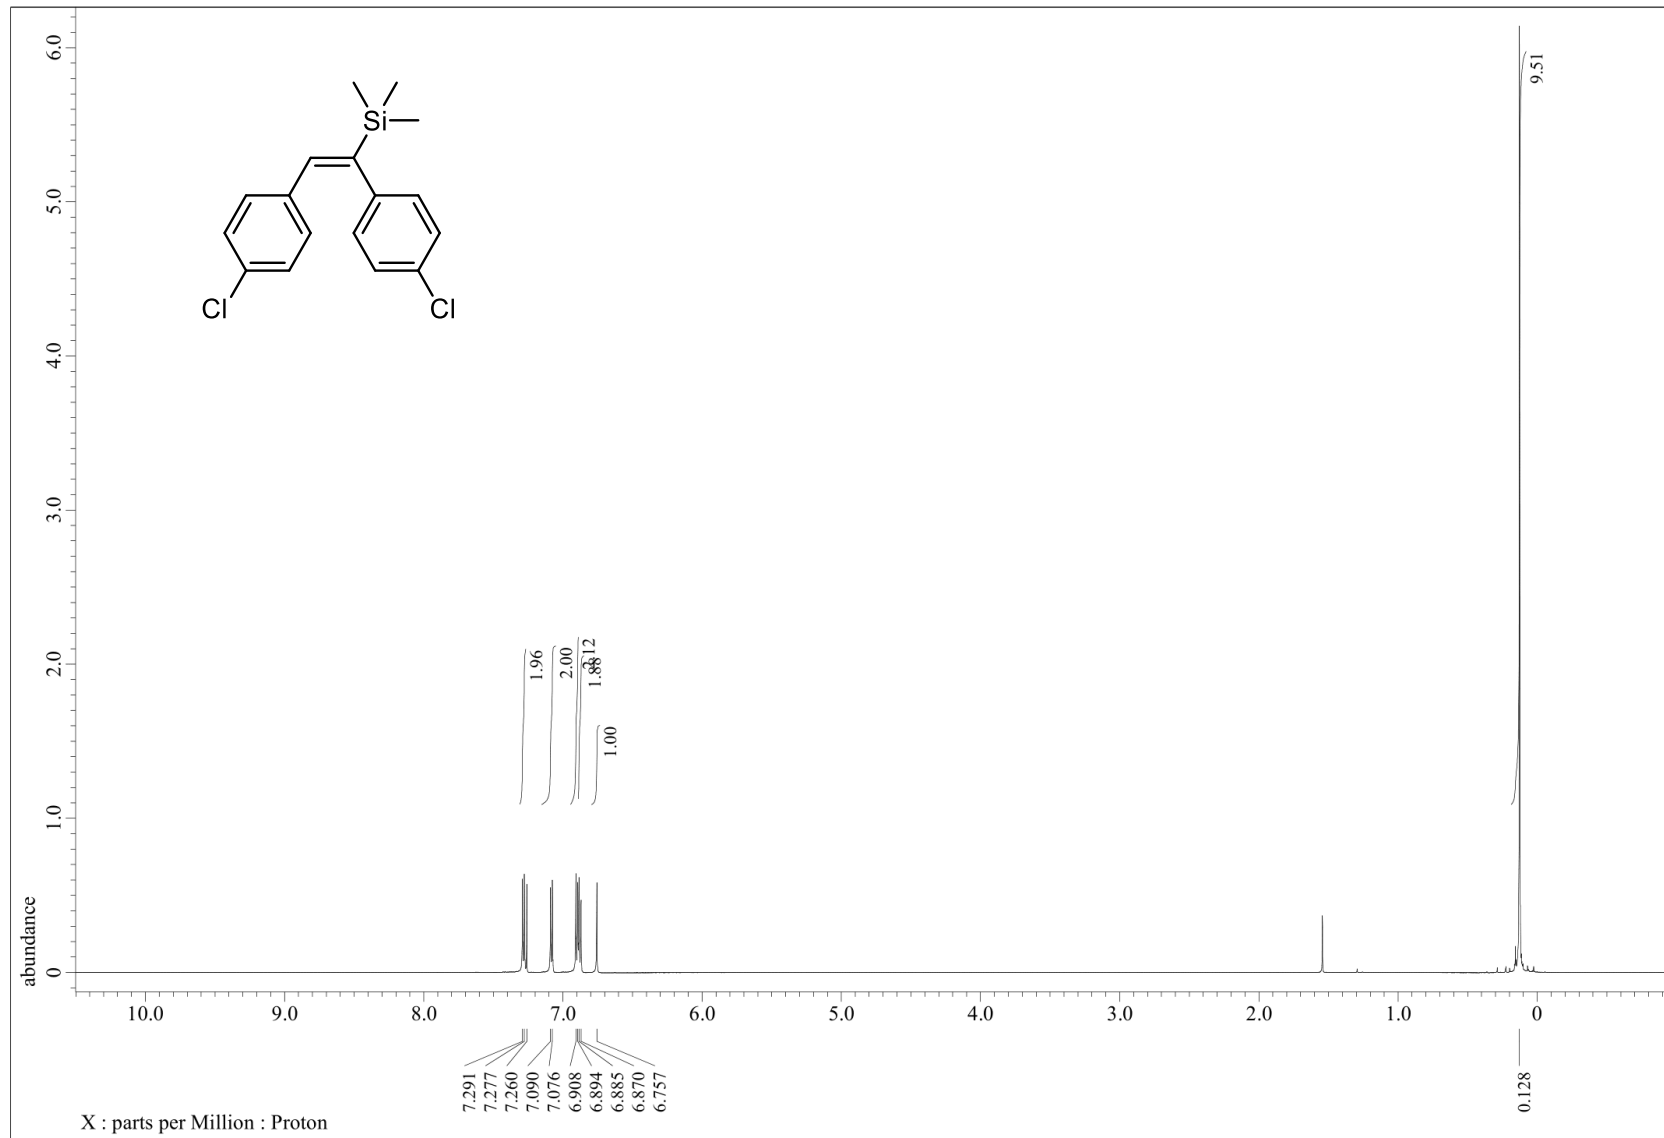

**Figure S41.** <sup>1</sup>H NMR (600 MHz, CDCl<sub>3</sub>) spectrum of **3g**

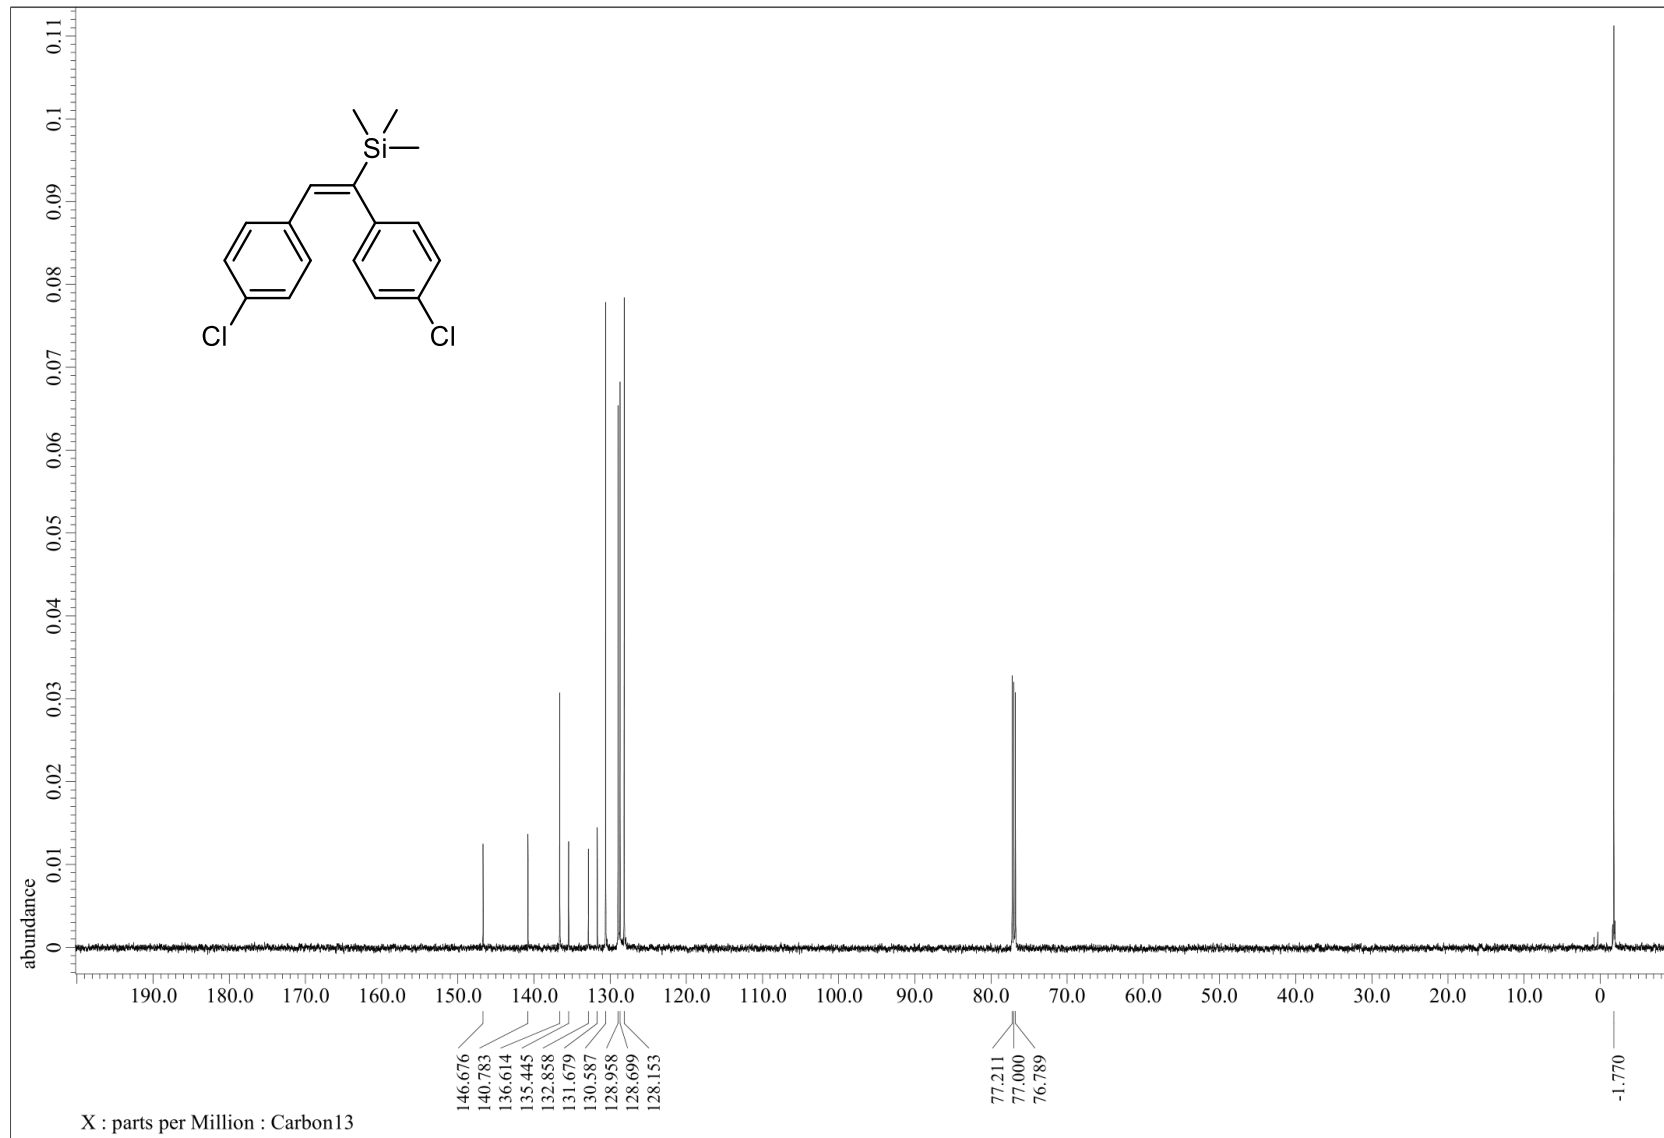

Figure S42.  $^{13}\text{C}$  NMR (151 MHz,  $\text{CDCl}_3$ ) spectrum of **3g**

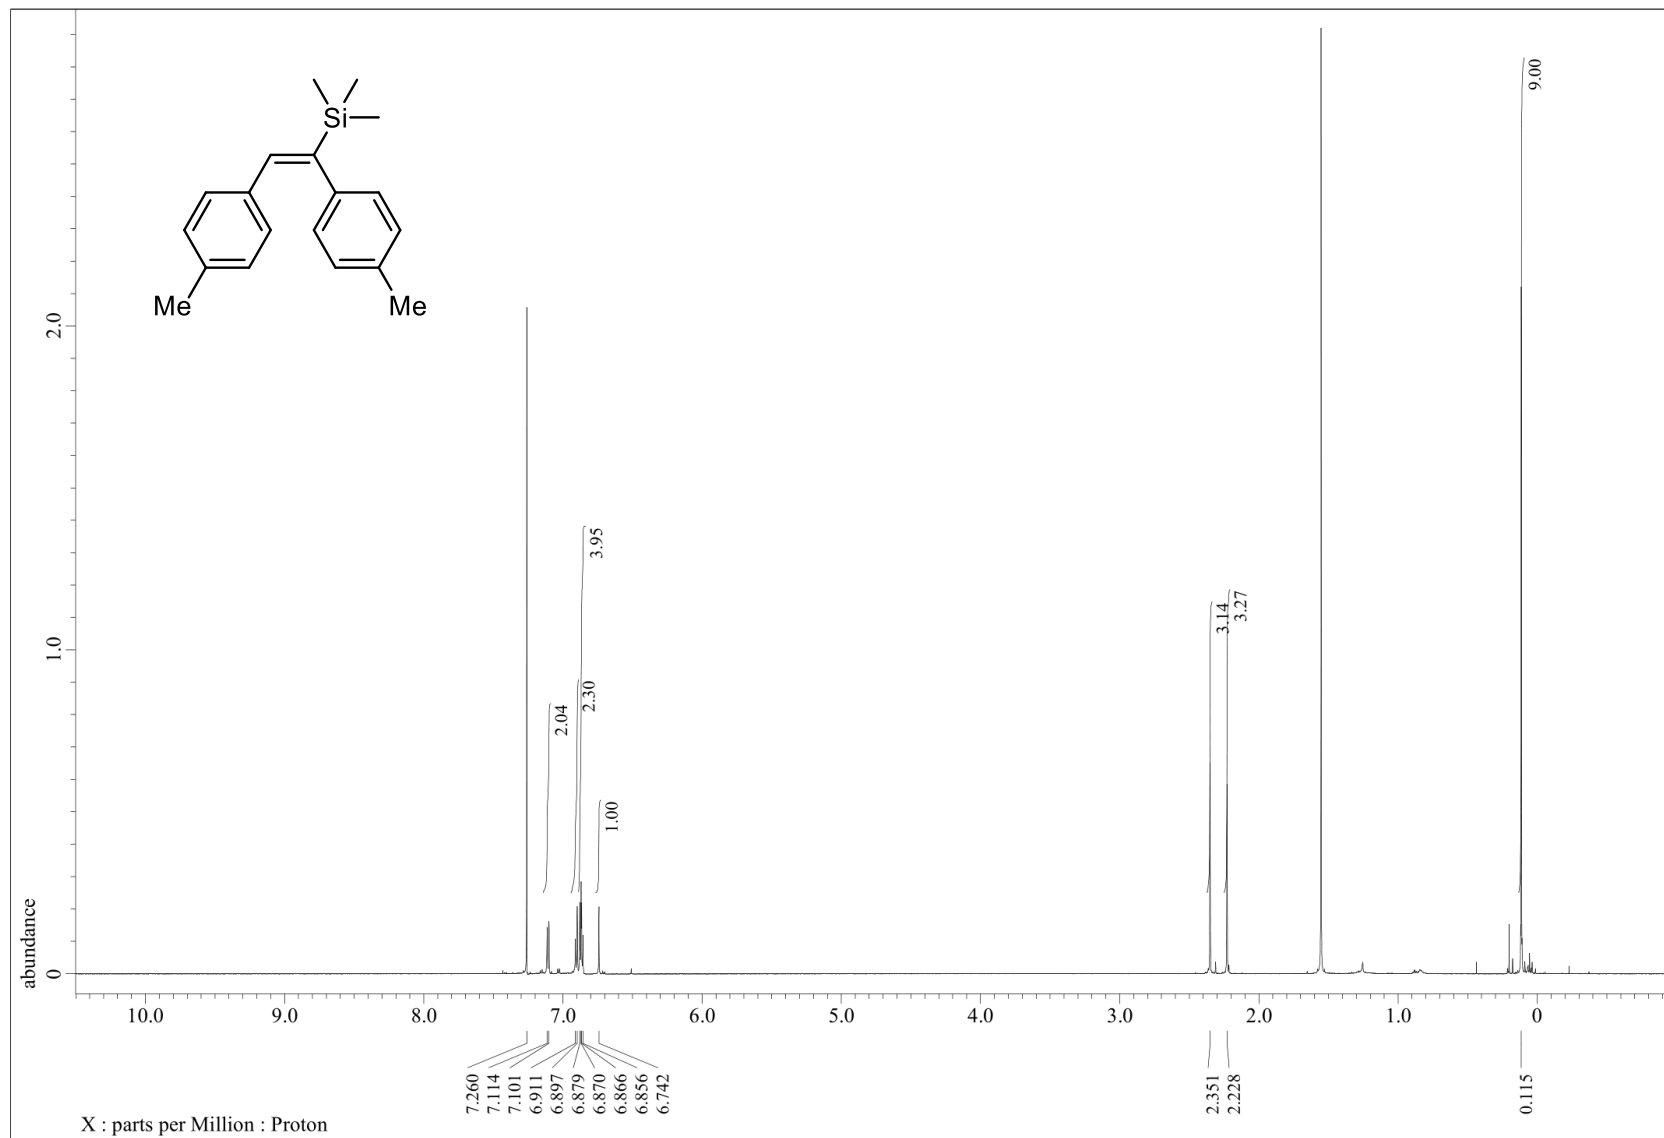

**Figure S43.** <sup>1</sup>H NMR (600 MHz, CDCl<sub>3</sub>) spectrum of **3h**

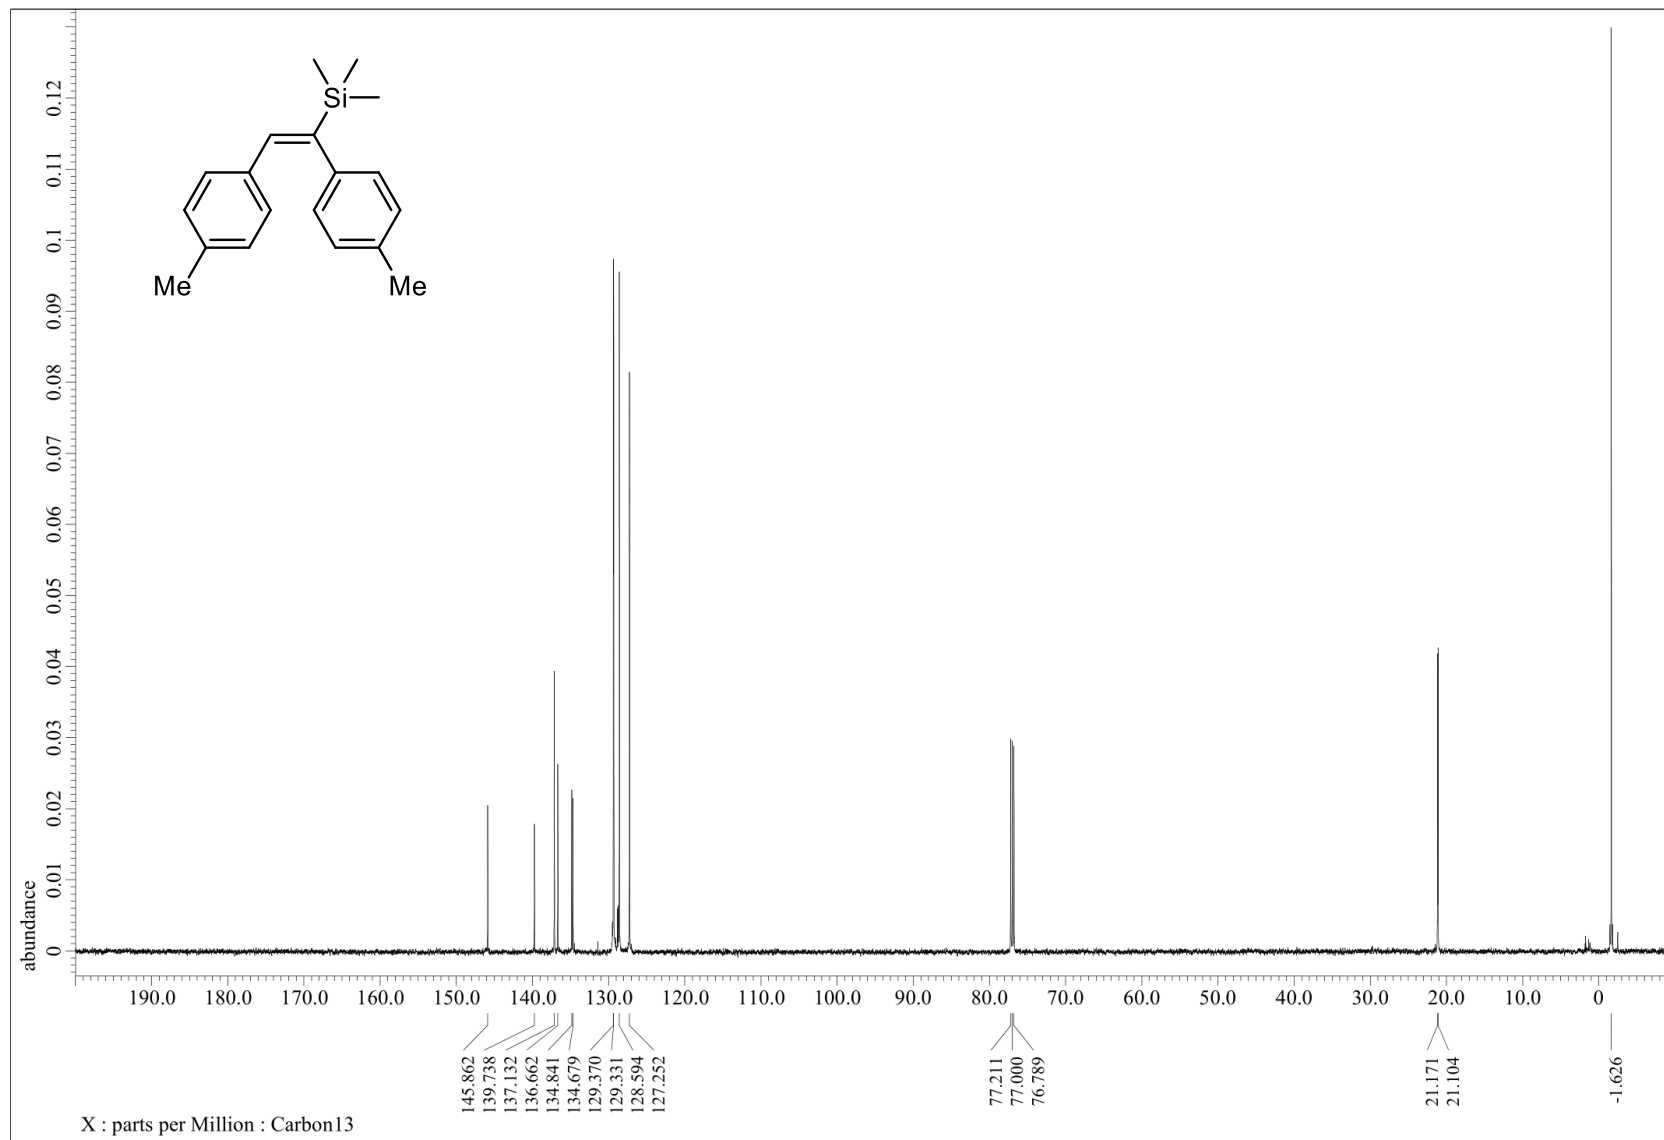

**Figure S44.** <sup>13</sup>C NMR (151 MHz, CDCl<sub>3</sub>) spectrum of **3h**



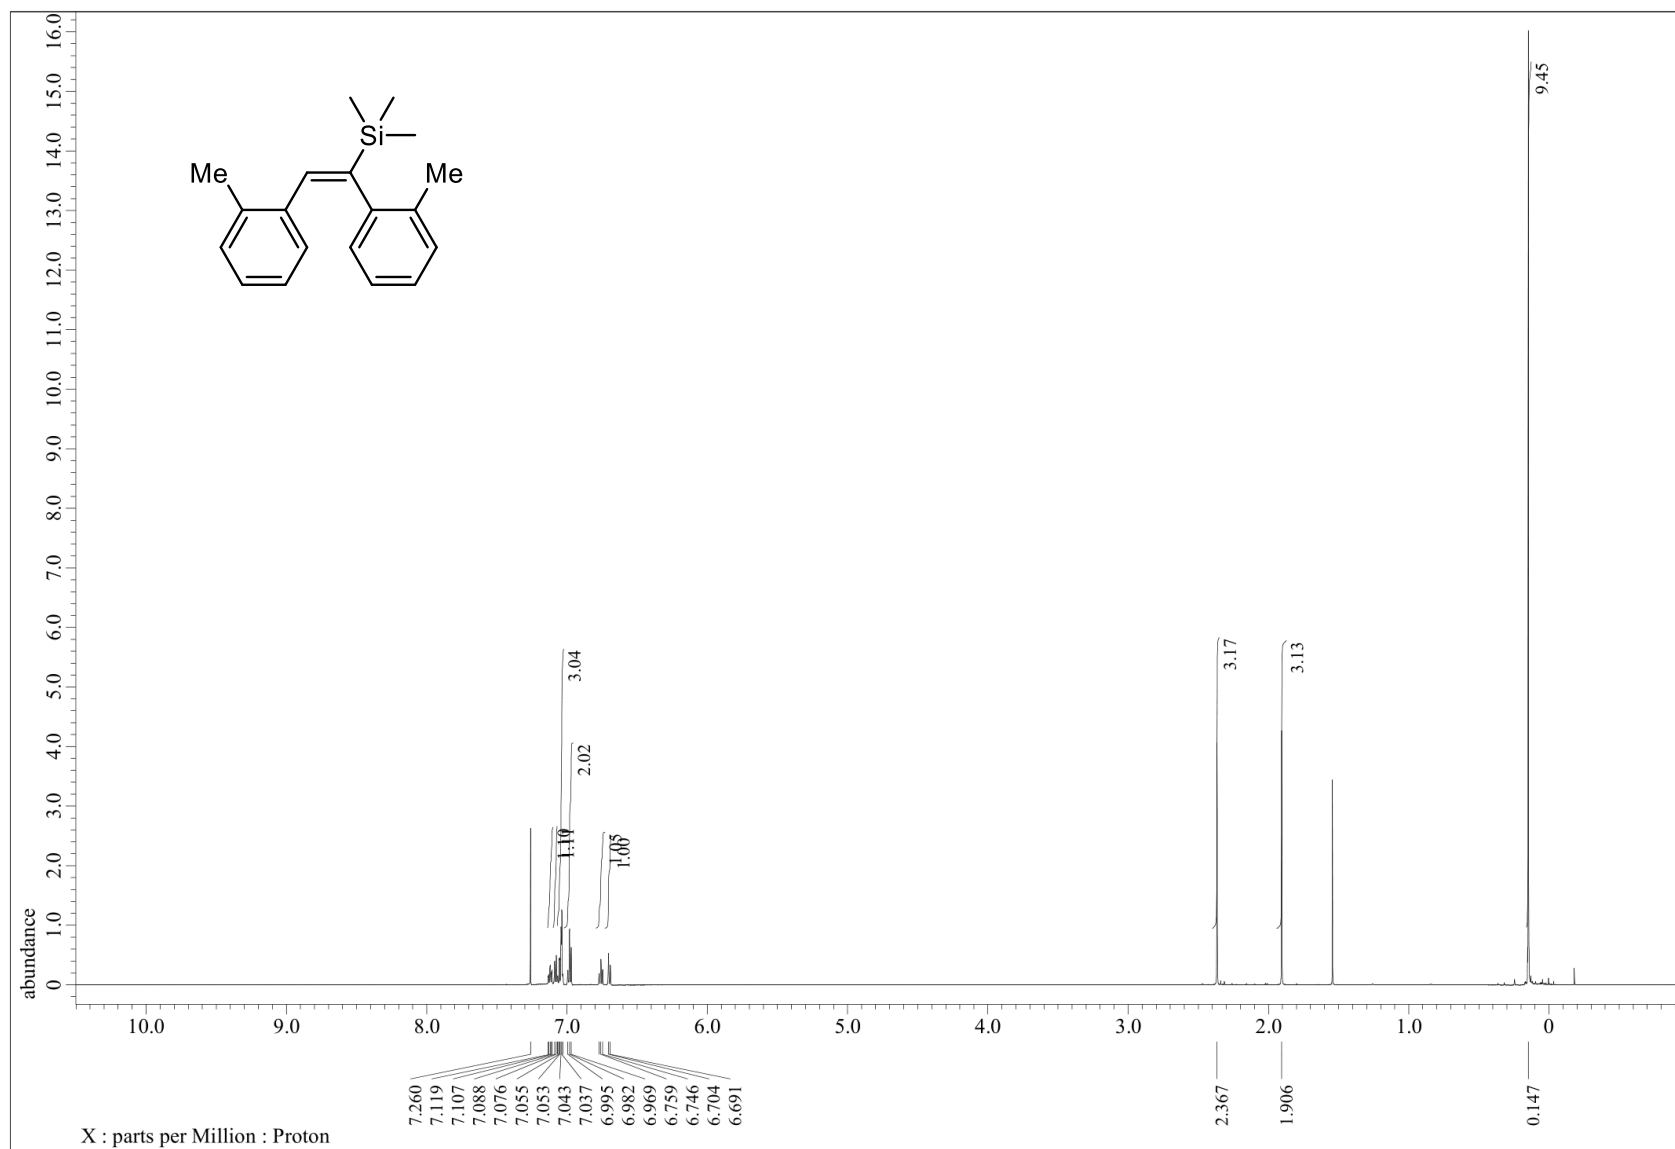

**Figure S45.** <sup>1</sup>H NMR (600 MHz, CDCl<sub>3</sub>) spectrum of **3i**

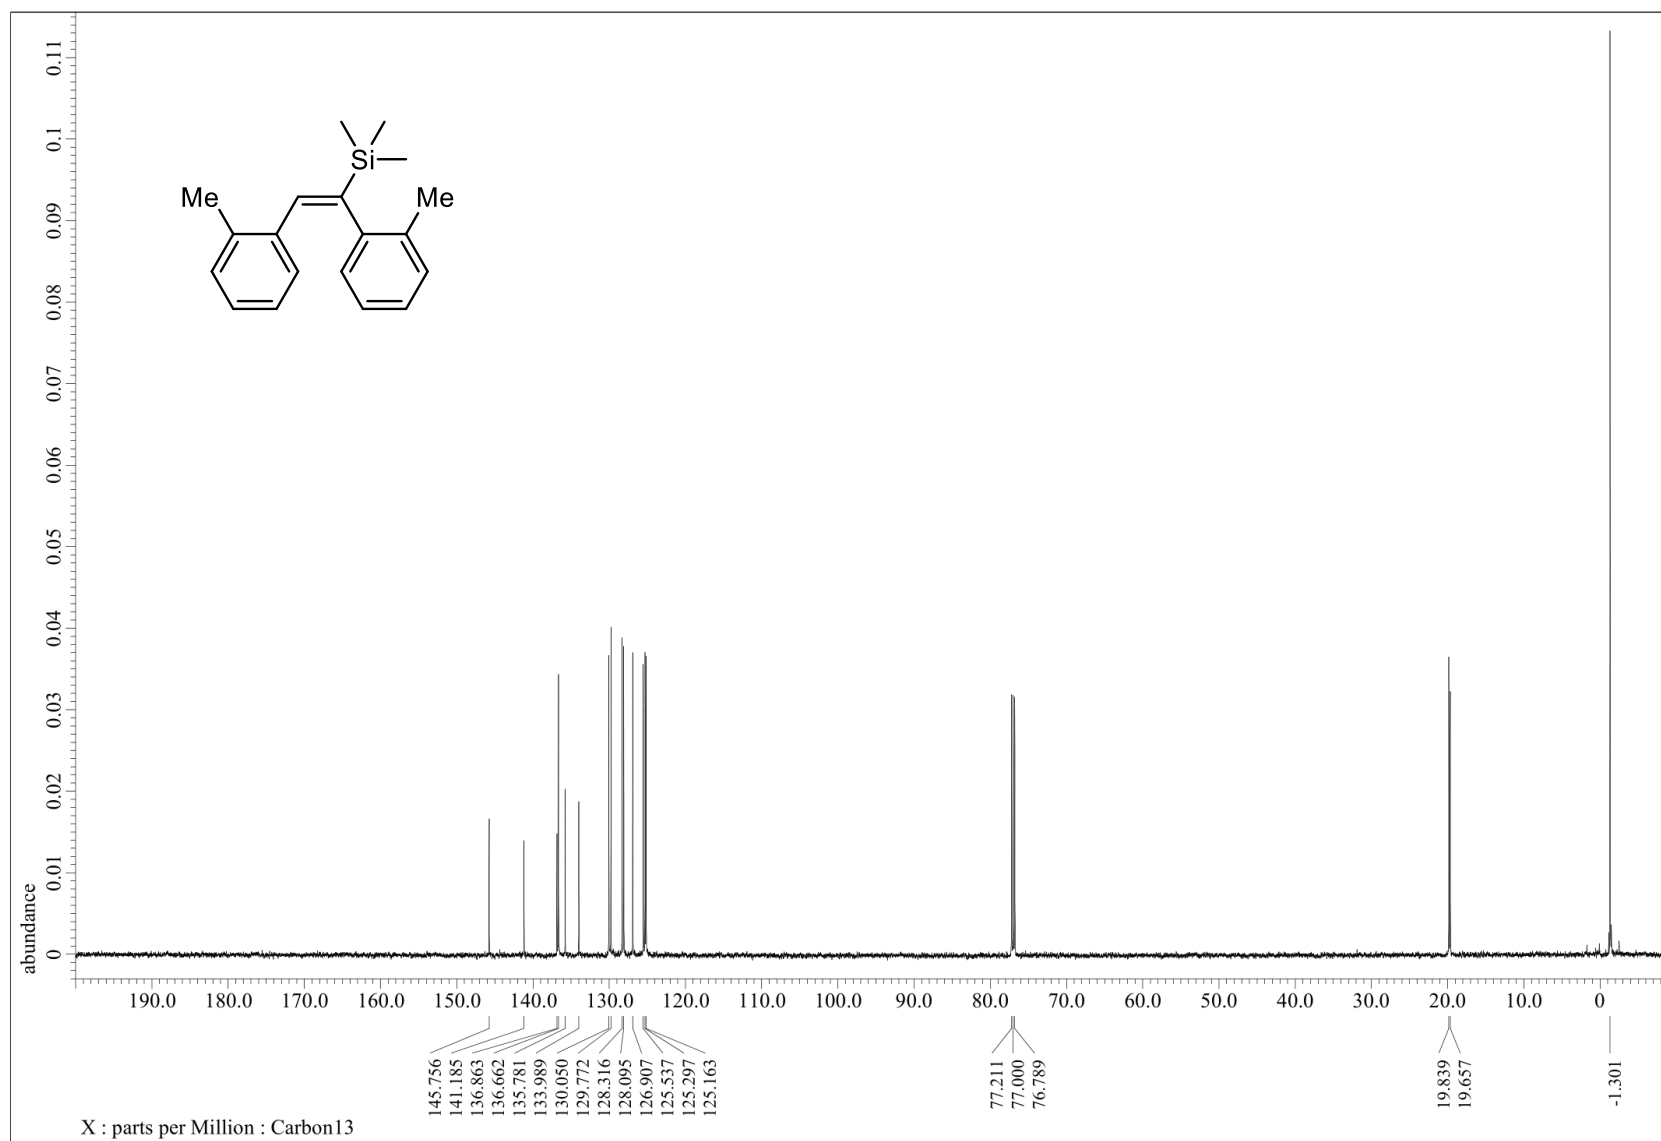

Figure S46.  $^{13}\text{C}$  NMR (151 MHz,  $\text{CDCl}_3$ ) spectrum of **3i**

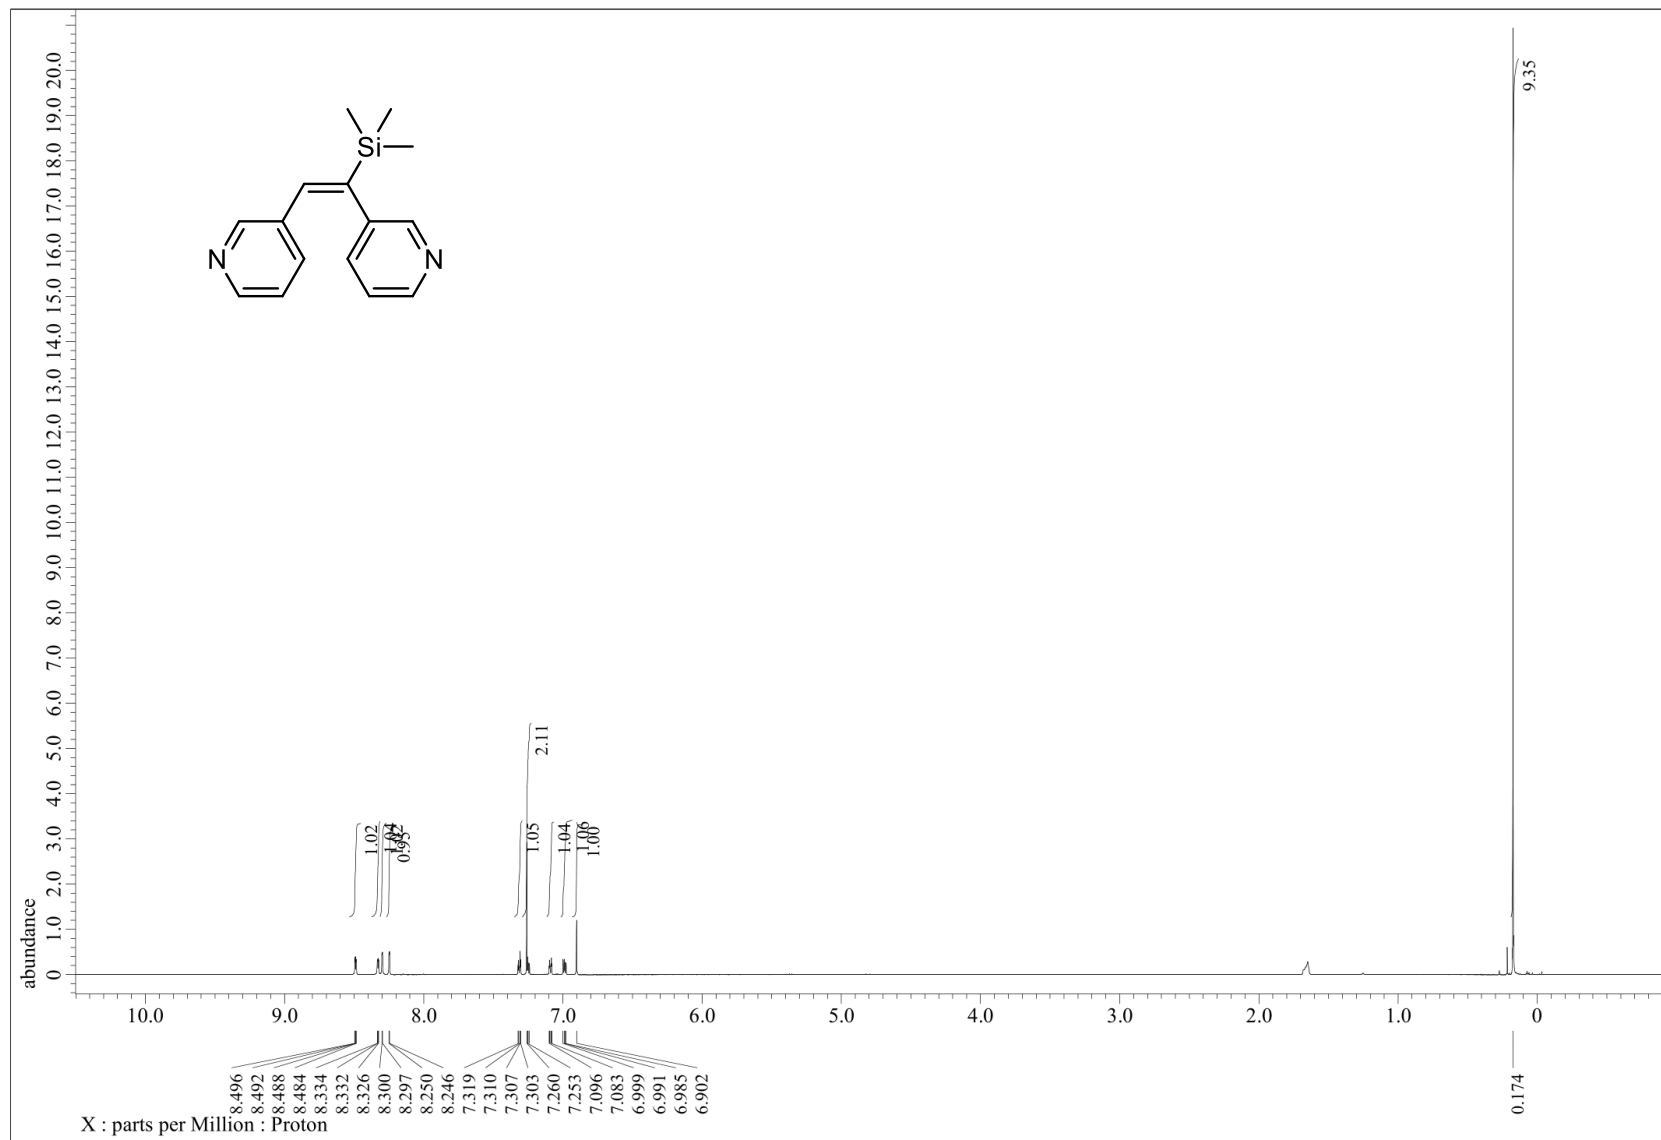

**Figure S47.** <sup>1</sup>H NMR (600 MHz, CDCl<sub>3</sub>) spectrum of **3k**

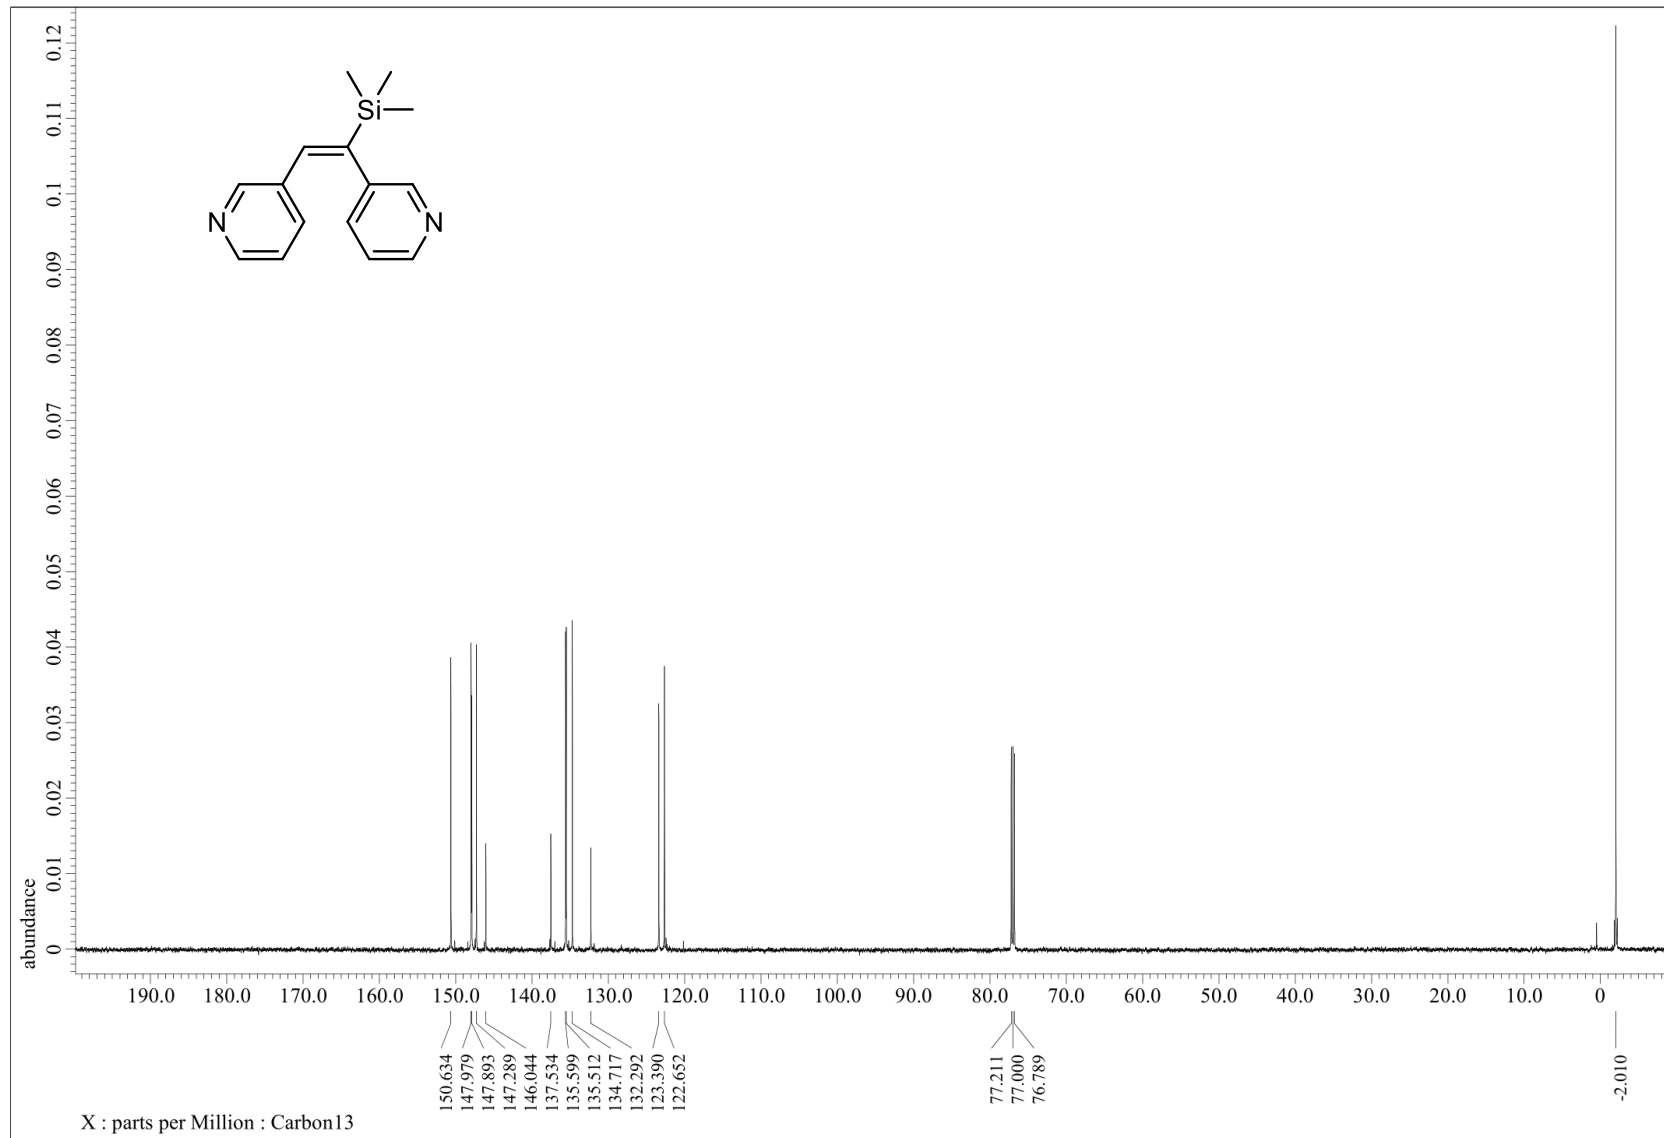

**Figure S48.** <sup>13</sup>C NMR (151 MHz, CDCl<sub>3</sub>) spectrum of **3k**

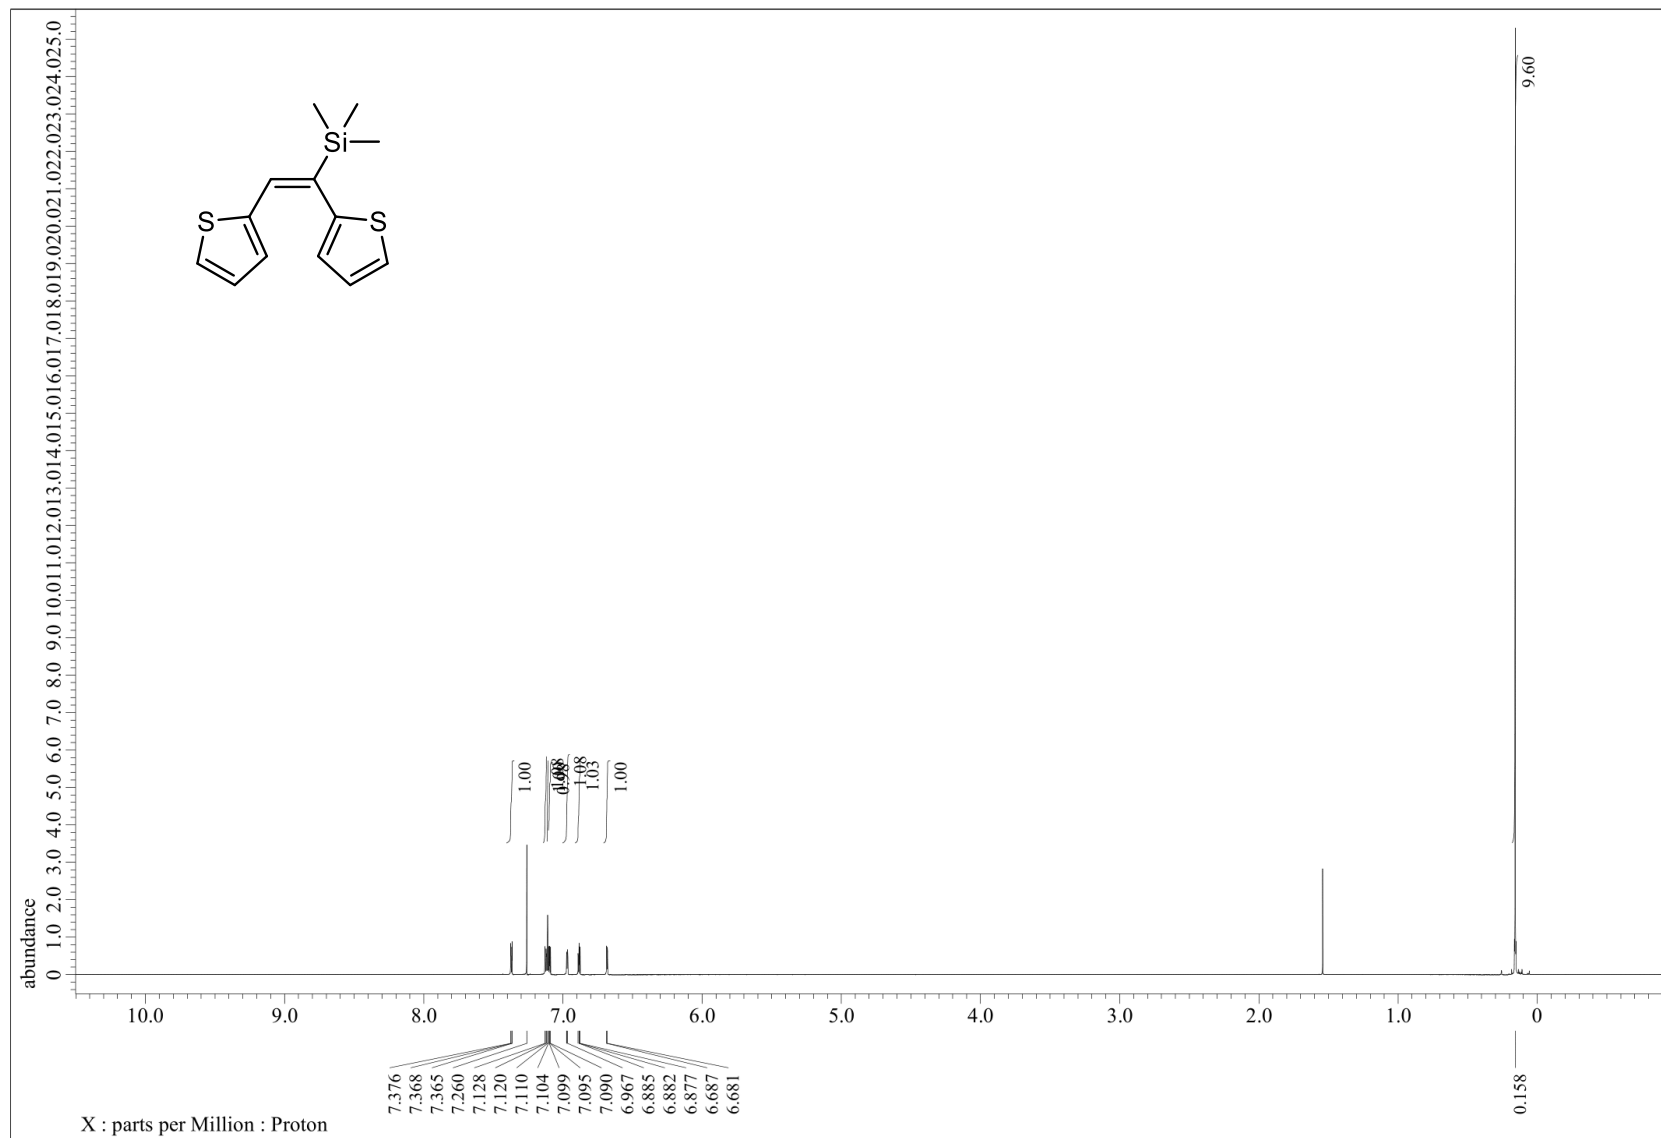

**Figure S49.** <sup>1</sup>H NMR (600 MHz, CDCl<sub>3</sub>) spectrum of **31**

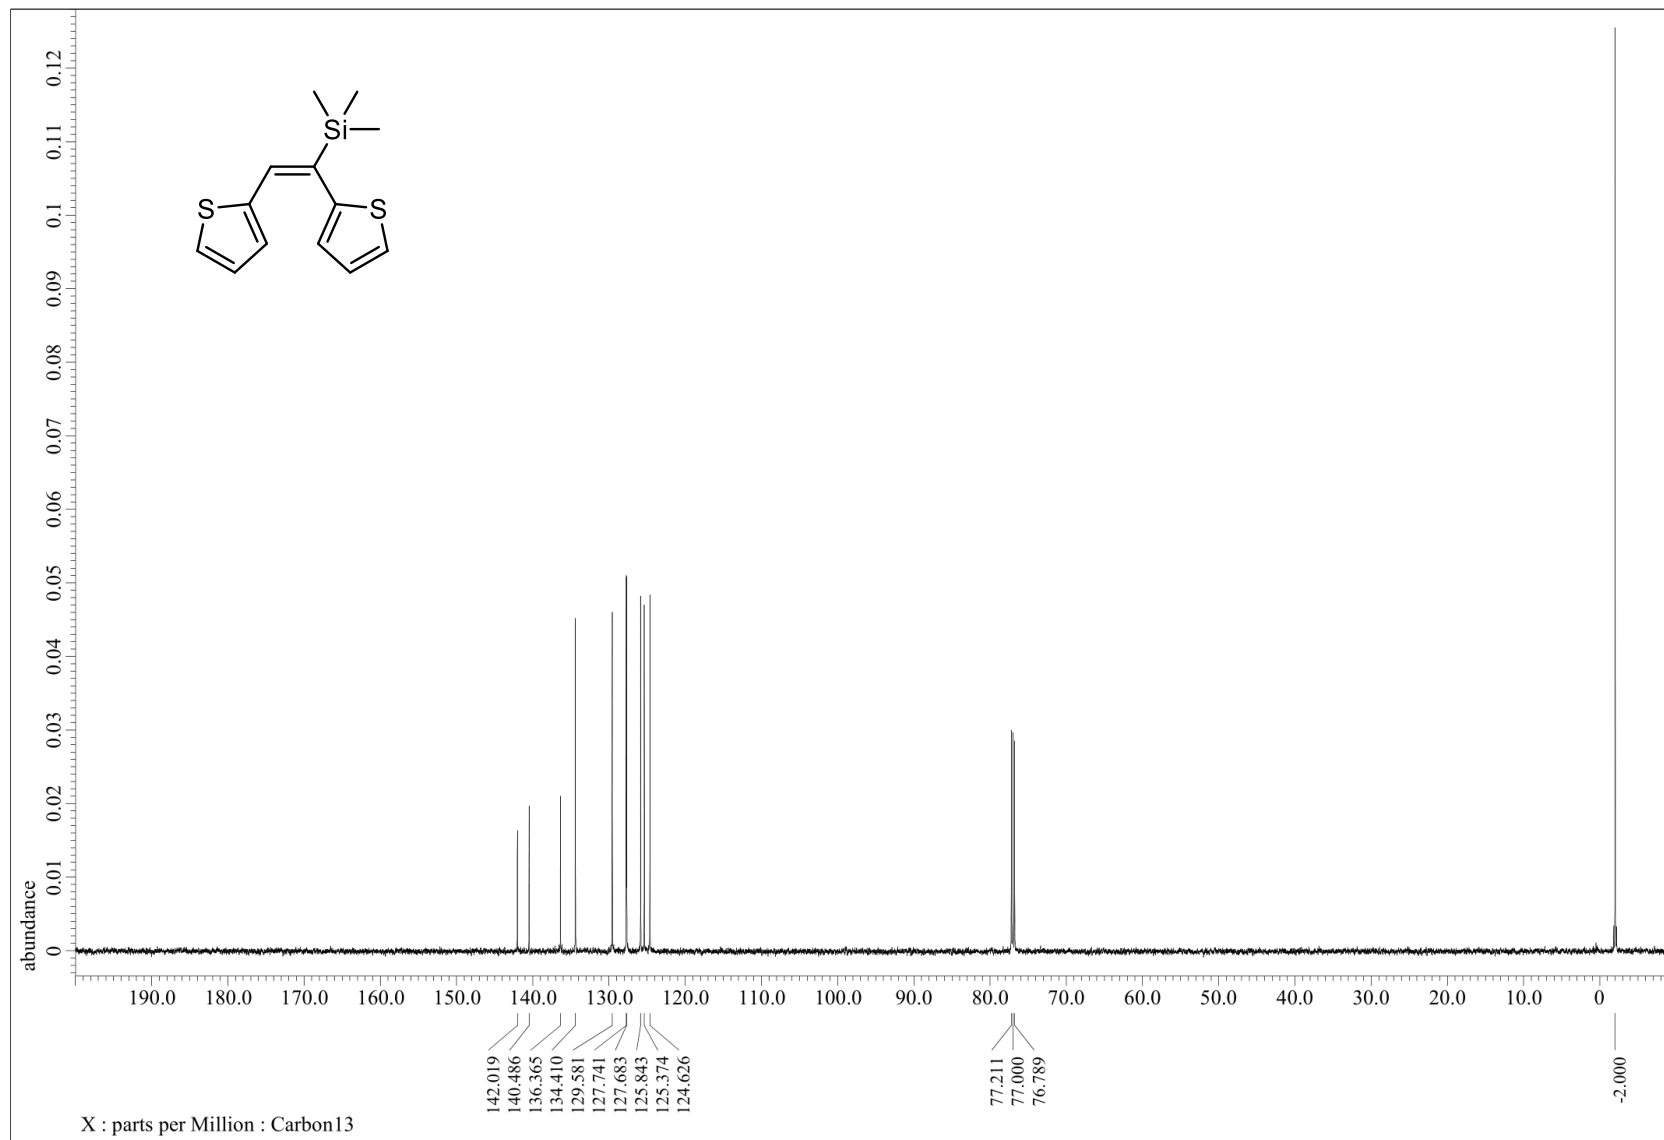

Figure S50. <sup>13</sup>C NMR (151 MHz, CDCl<sub>3</sub>) spectrum of **31**

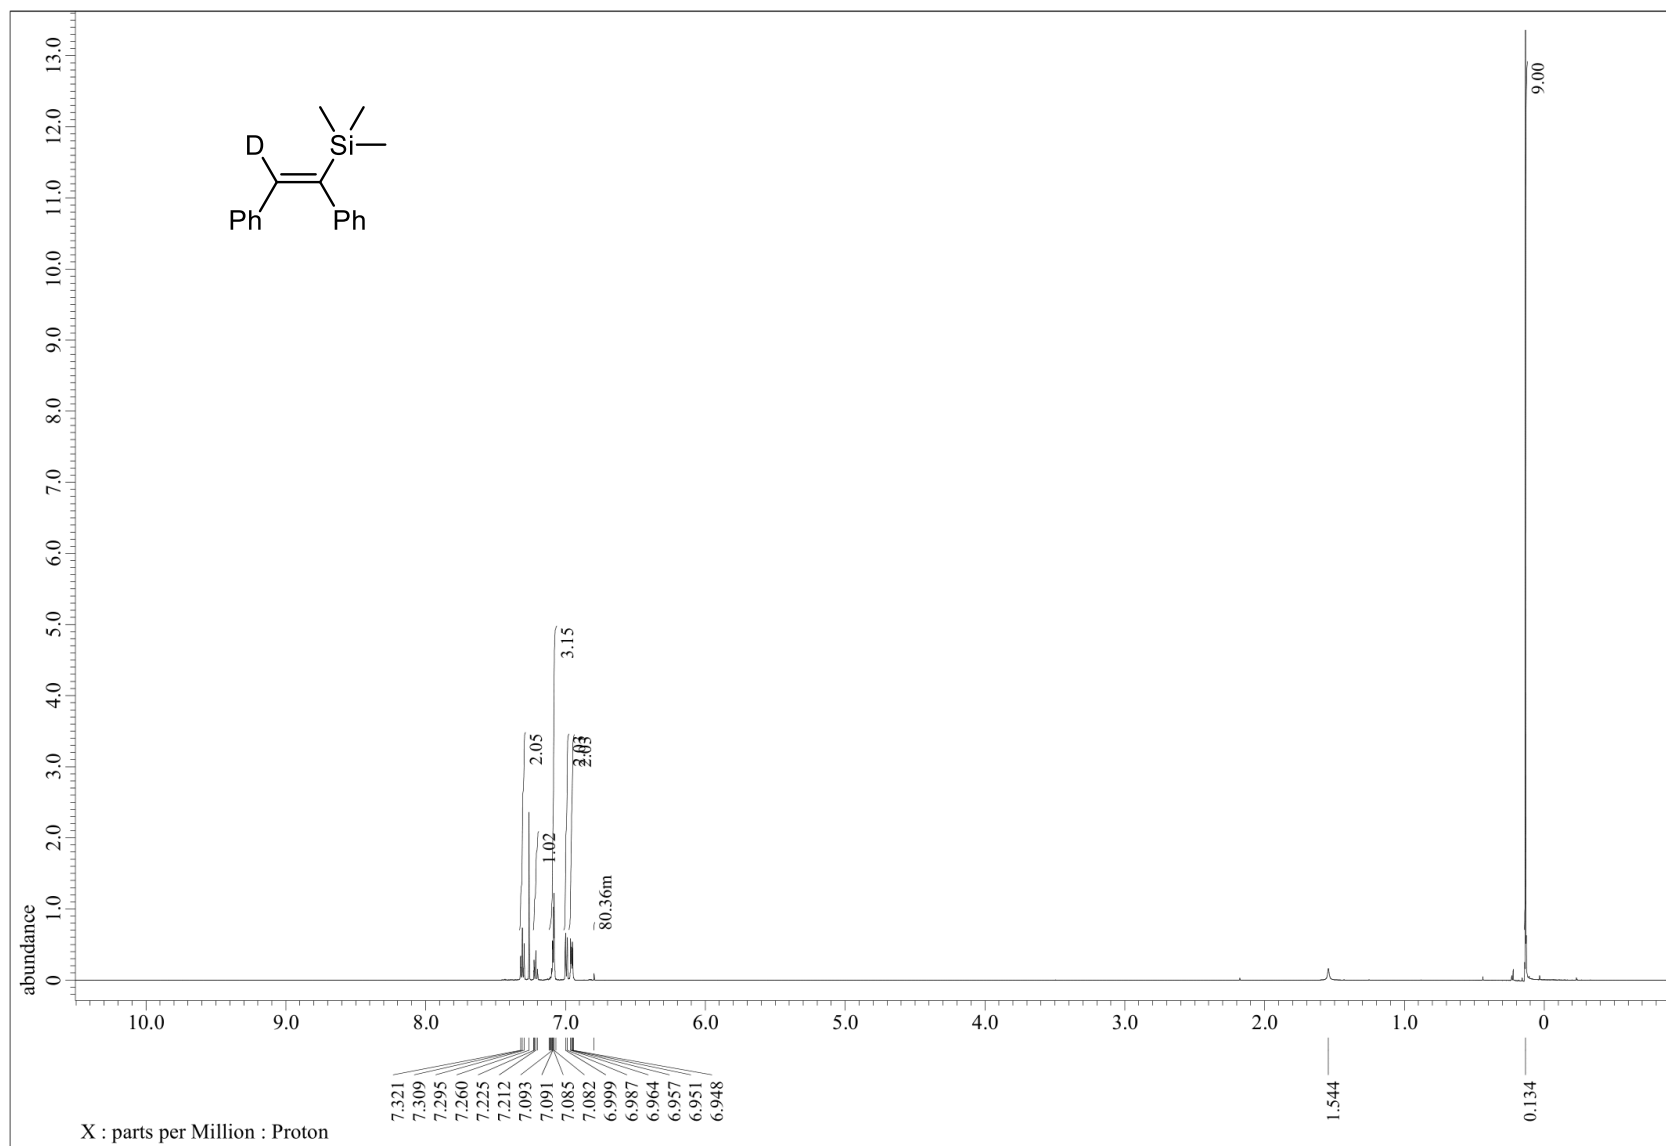

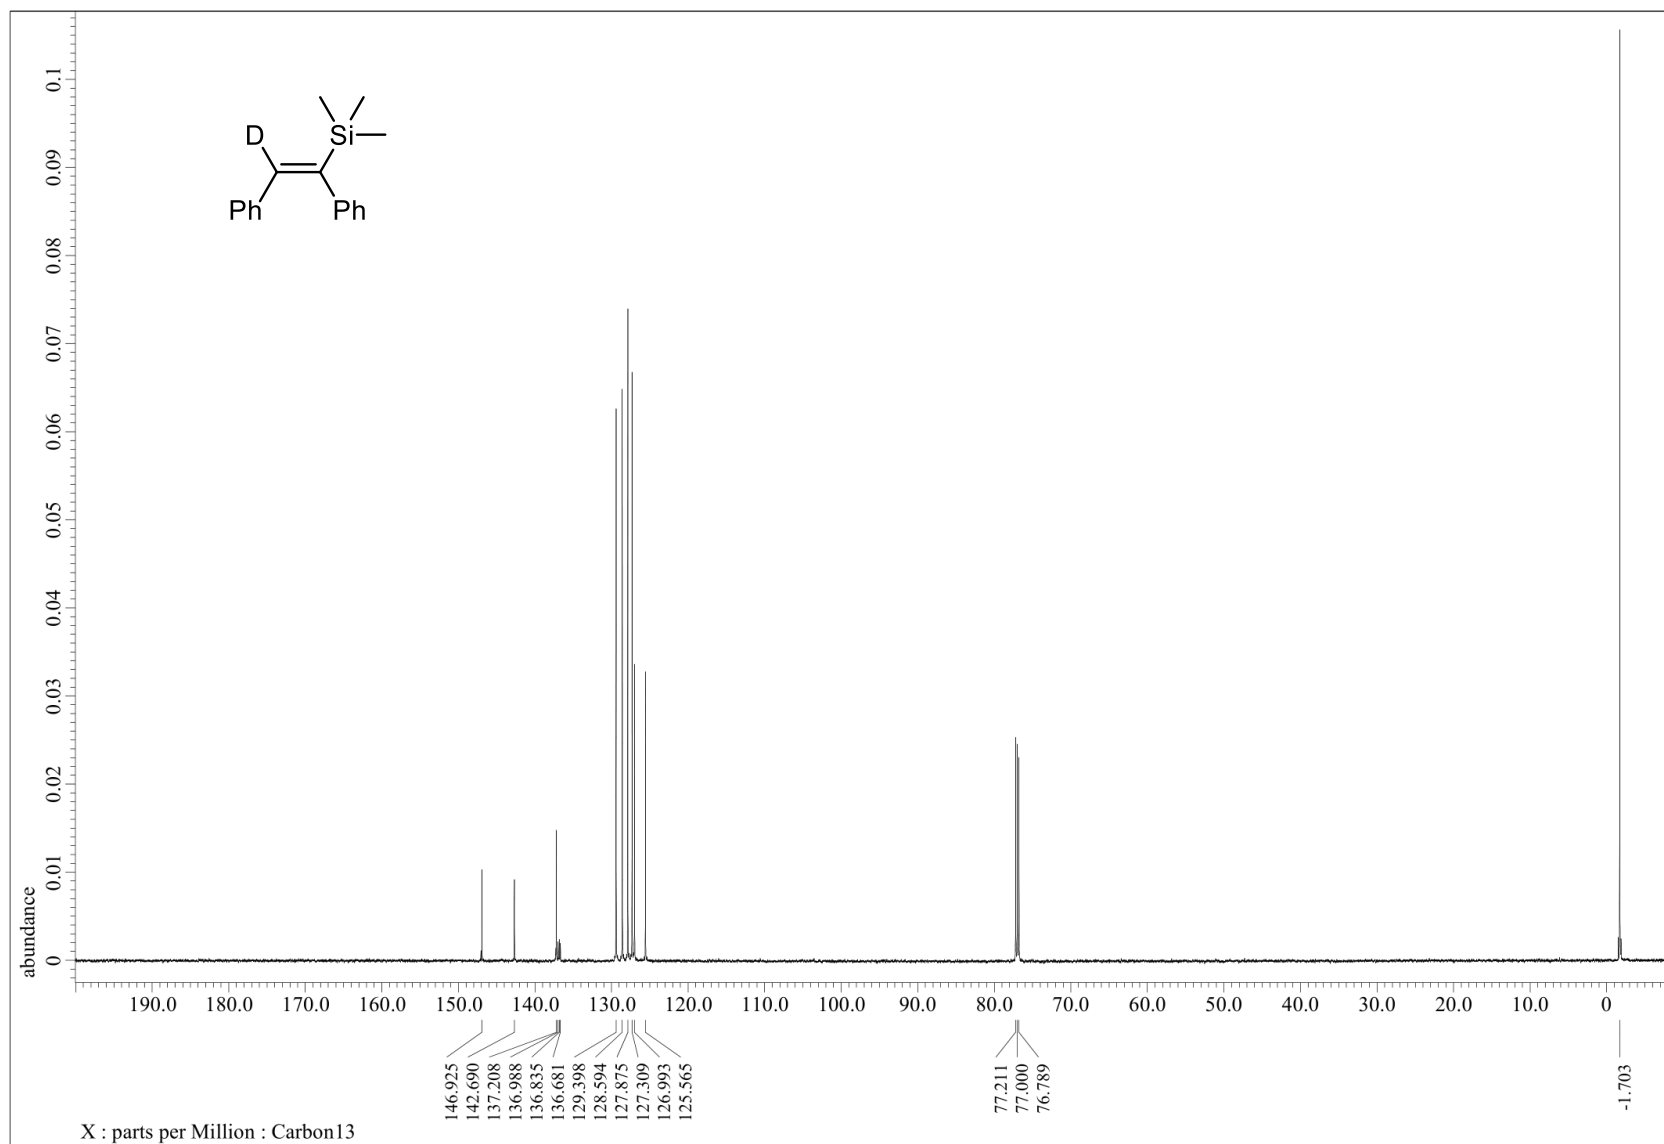

Figure S52. <sup>13</sup>C NMR (151 MHz, CDCl<sub>3</sub>) spectrum of **3m**



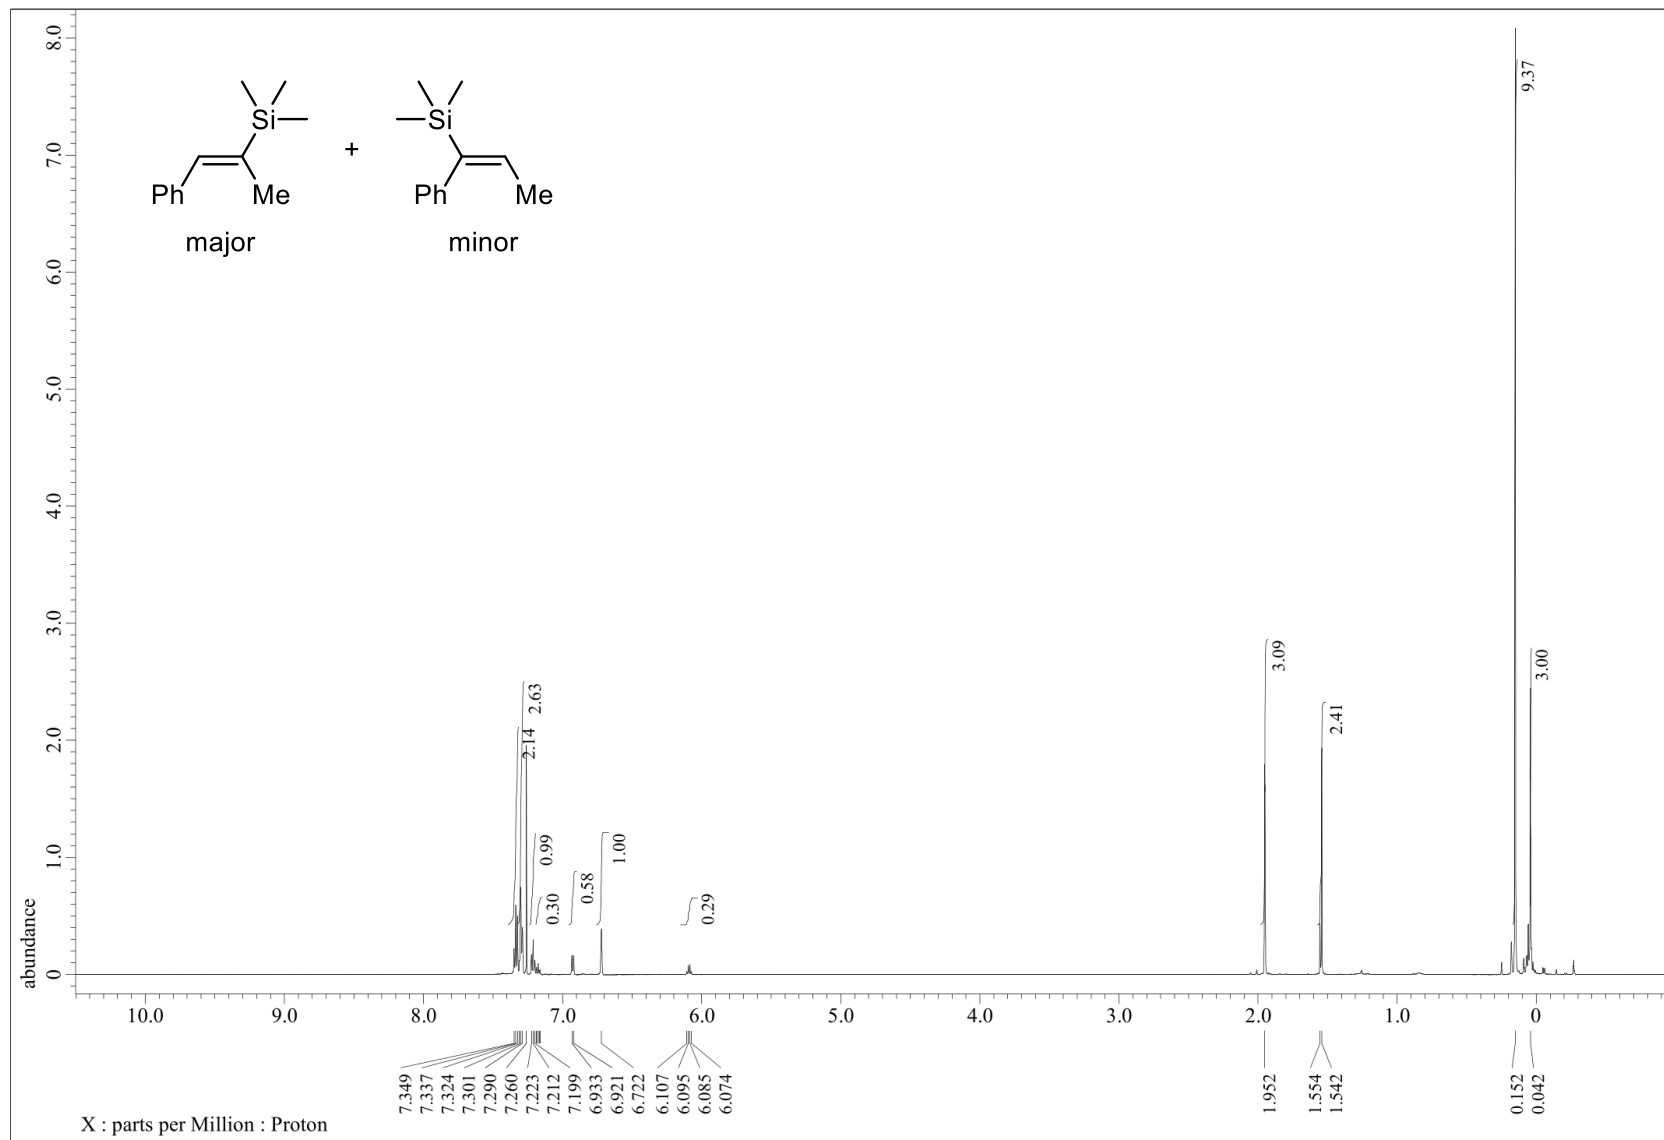

**Figure S53.**  $^1\text{H}$  NMR (600 MHz,  $\text{CDCl}_3$ ) spectrum of **3n** (using  $\text{P}(\text{OPh})_3$ )

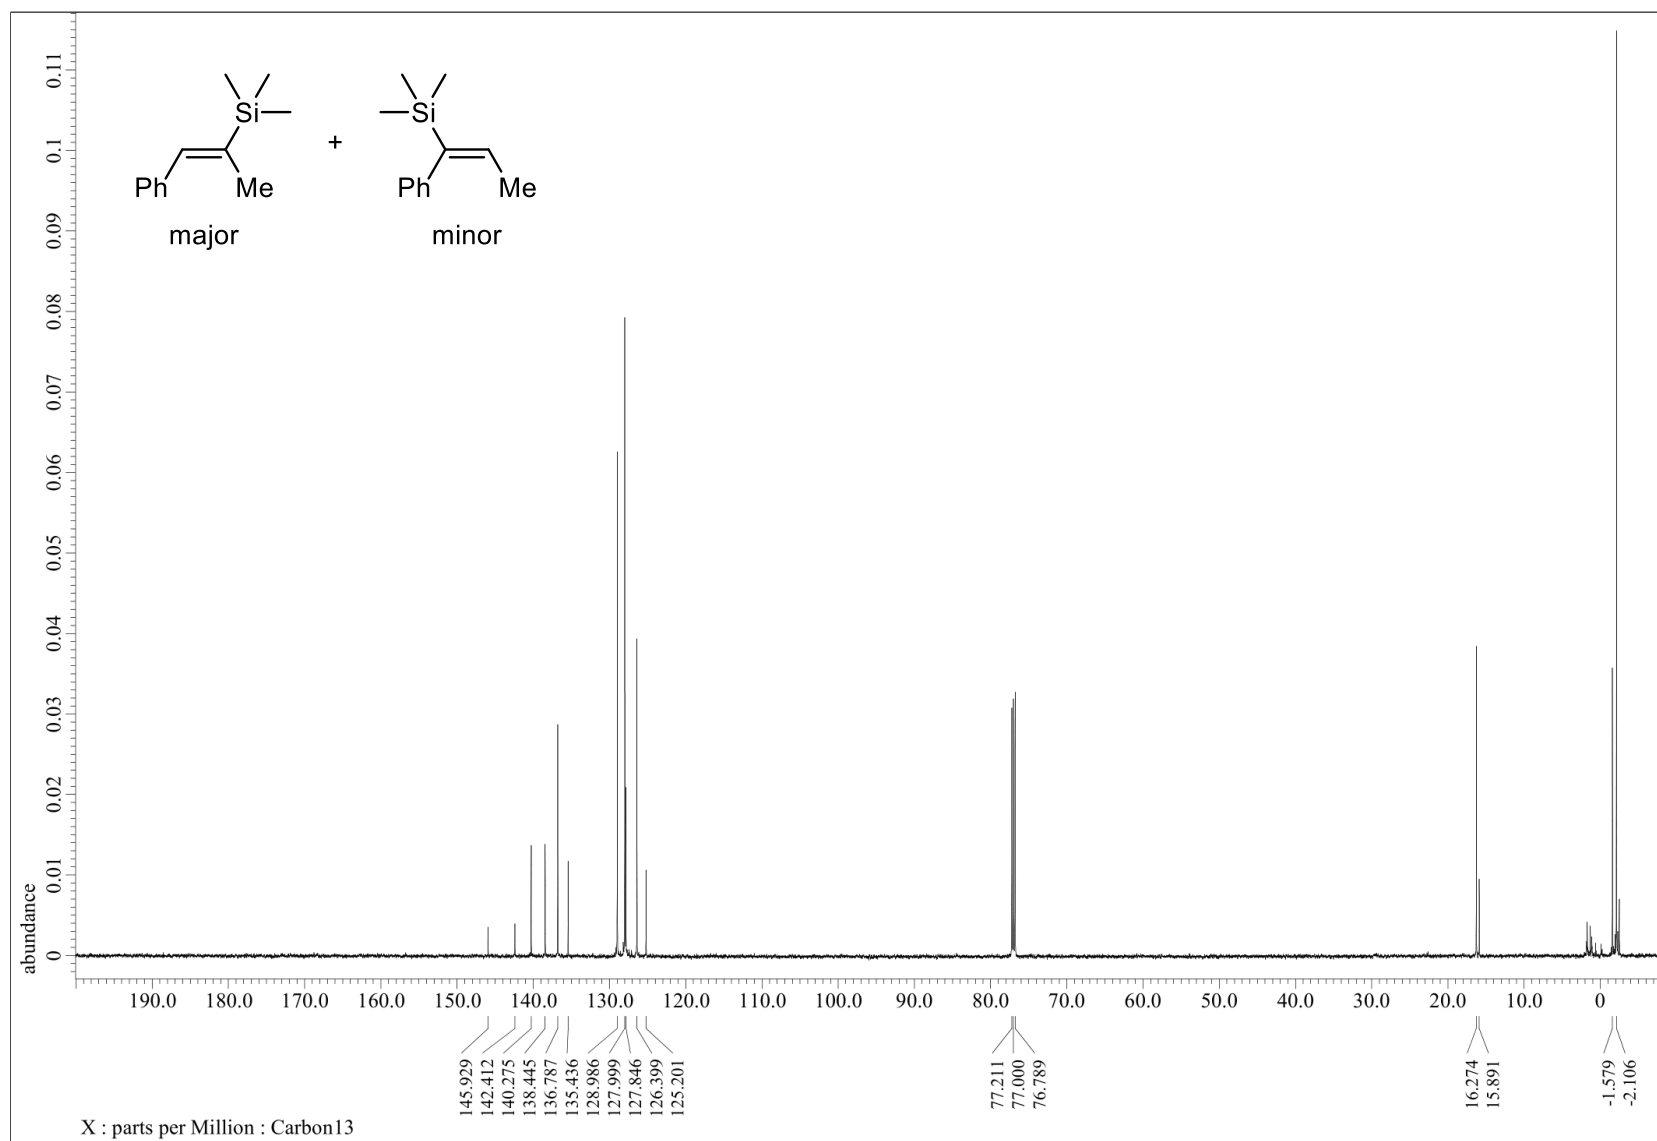

Figure S54.  $^{13}\text{C}$  NMR (151 MHz,  $\text{CDCl}_3$ ) spectrum of **3n** (using  $\text{P}(\text{OPh})_3$ )

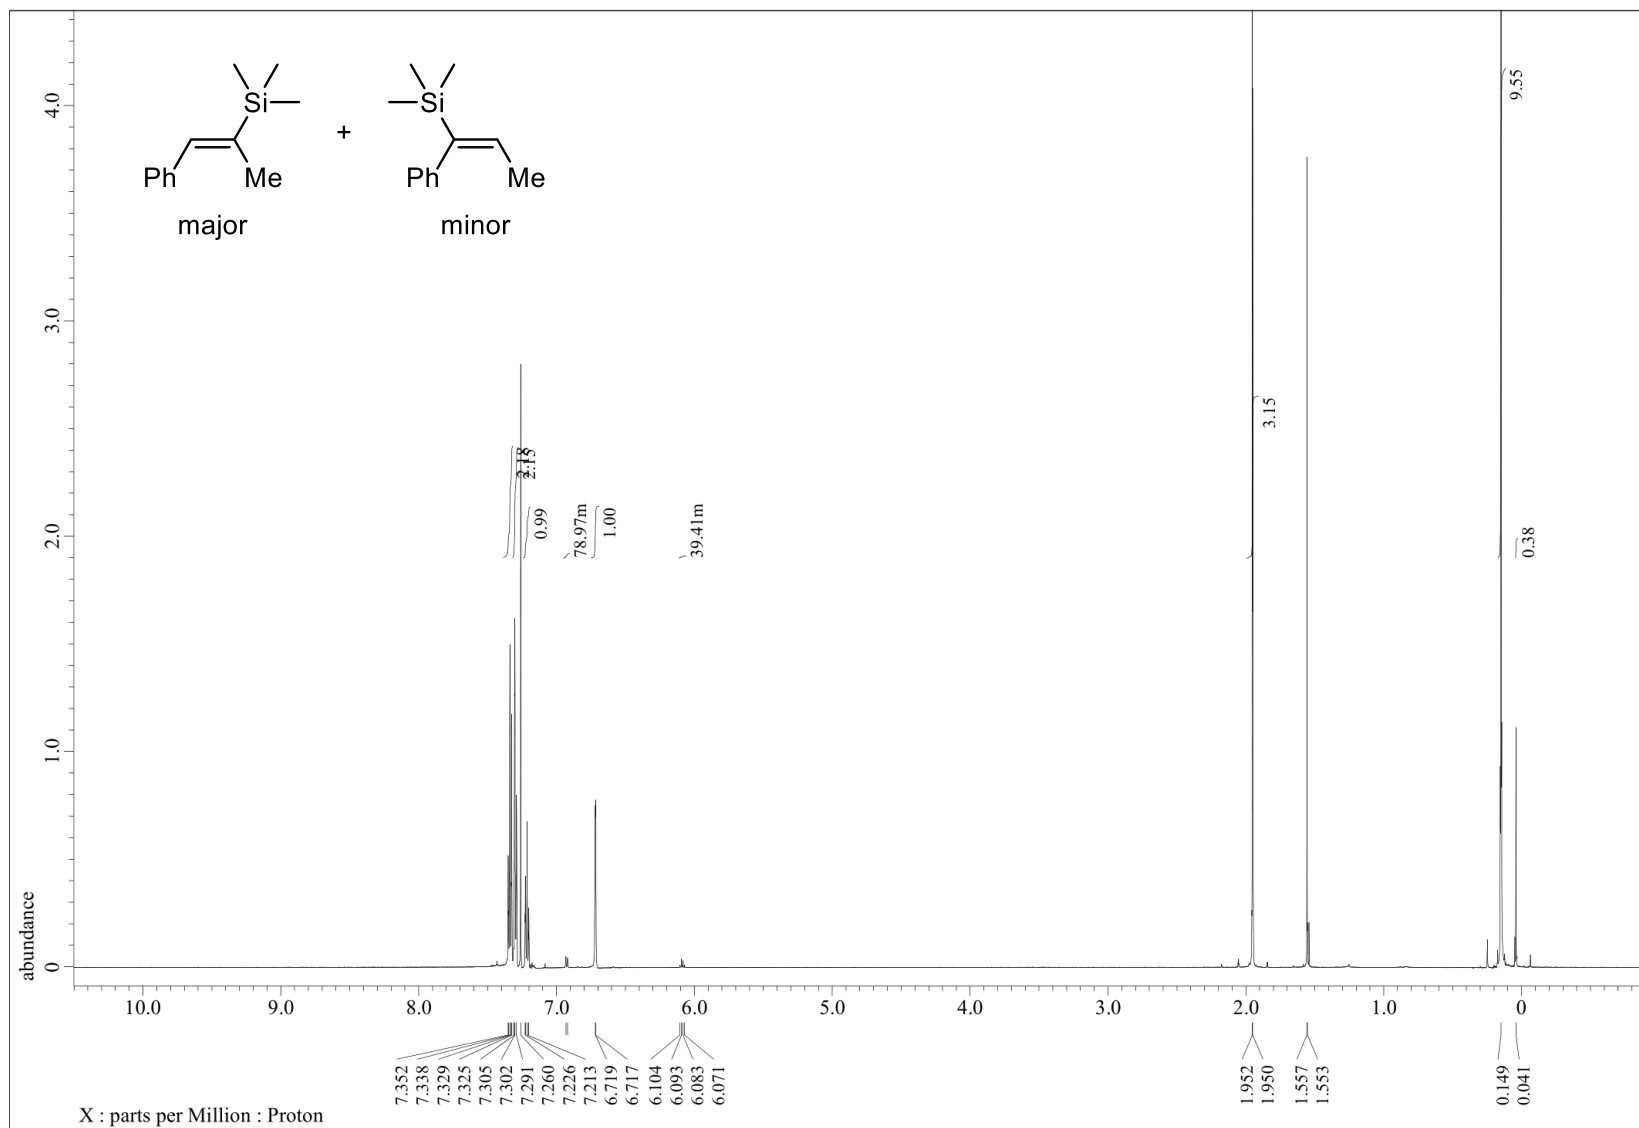

**Figure S55.**  $^1\text{H}$  NMR (600 MHz,  $\text{CDCl}_3$ ) spectrum of **3n** (using  $\text{PCy}_3$ )

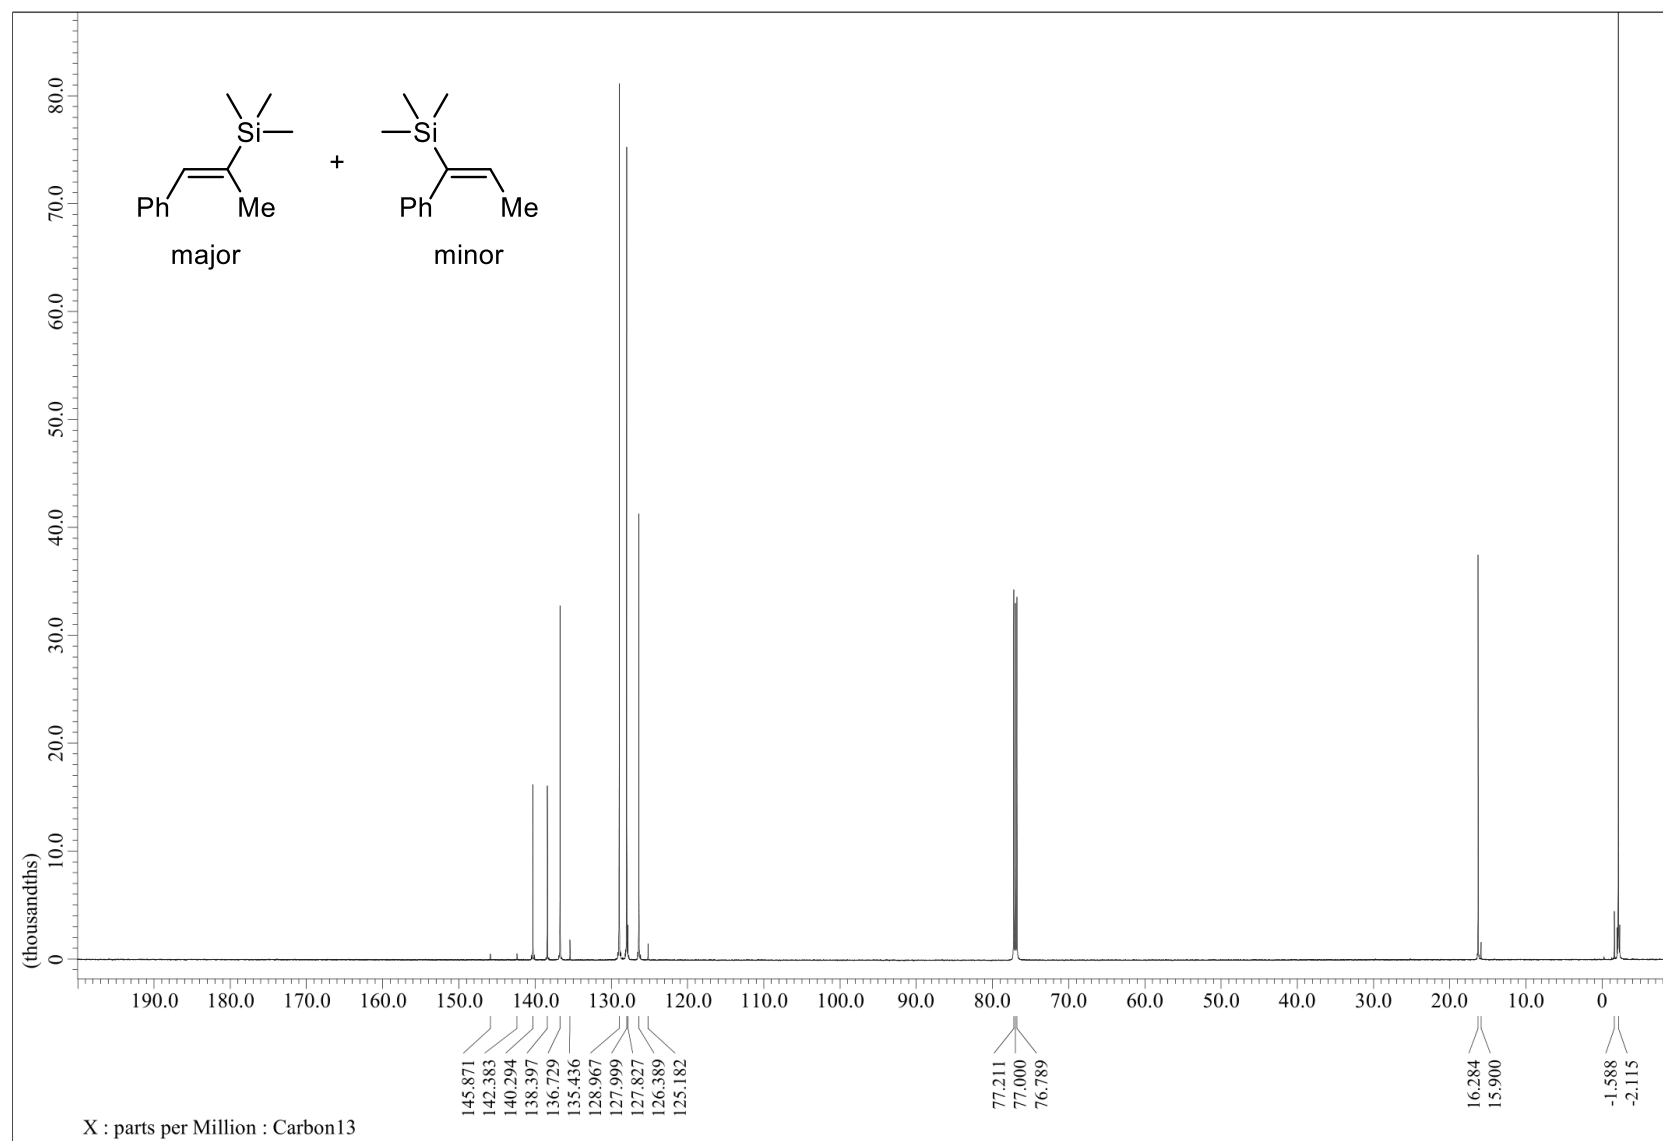

Figure S56.  $^{13}\text{C}$  NMR (151 MHz,  $\text{CDCl}_3$ ) spectrum of **3n** (using  $\text{PCy}_3$ )

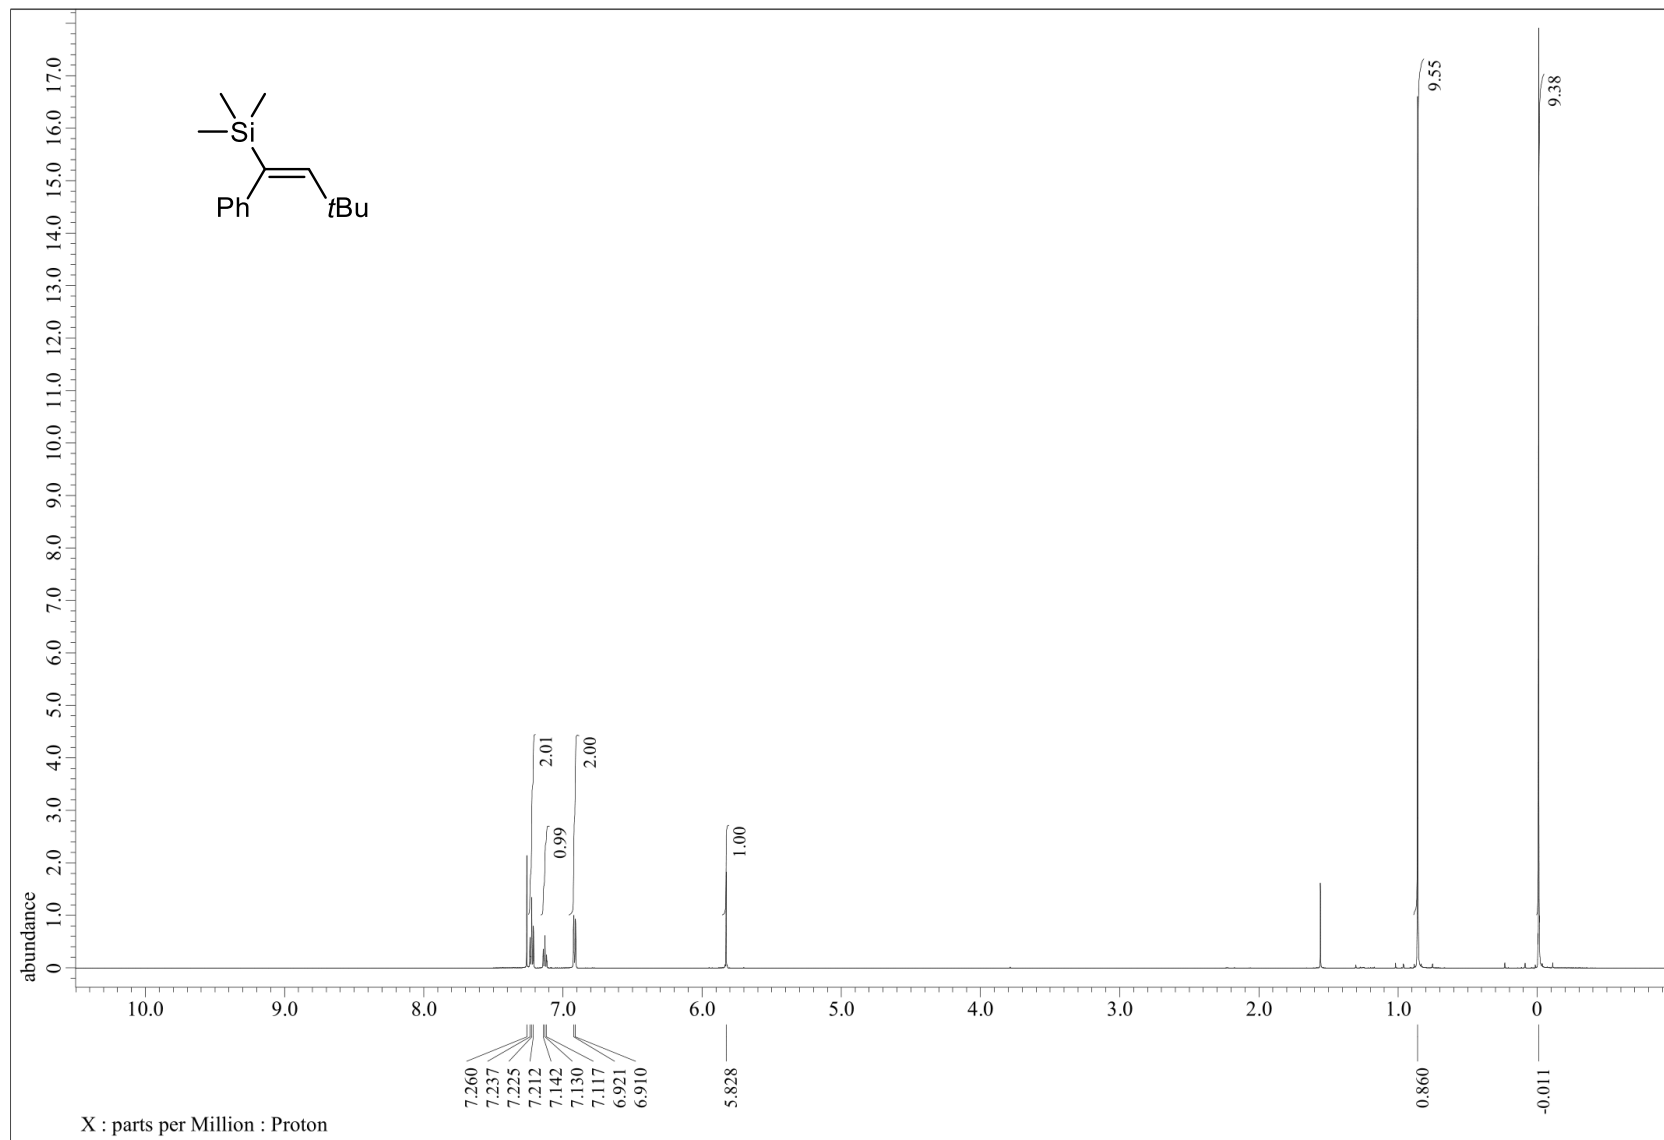

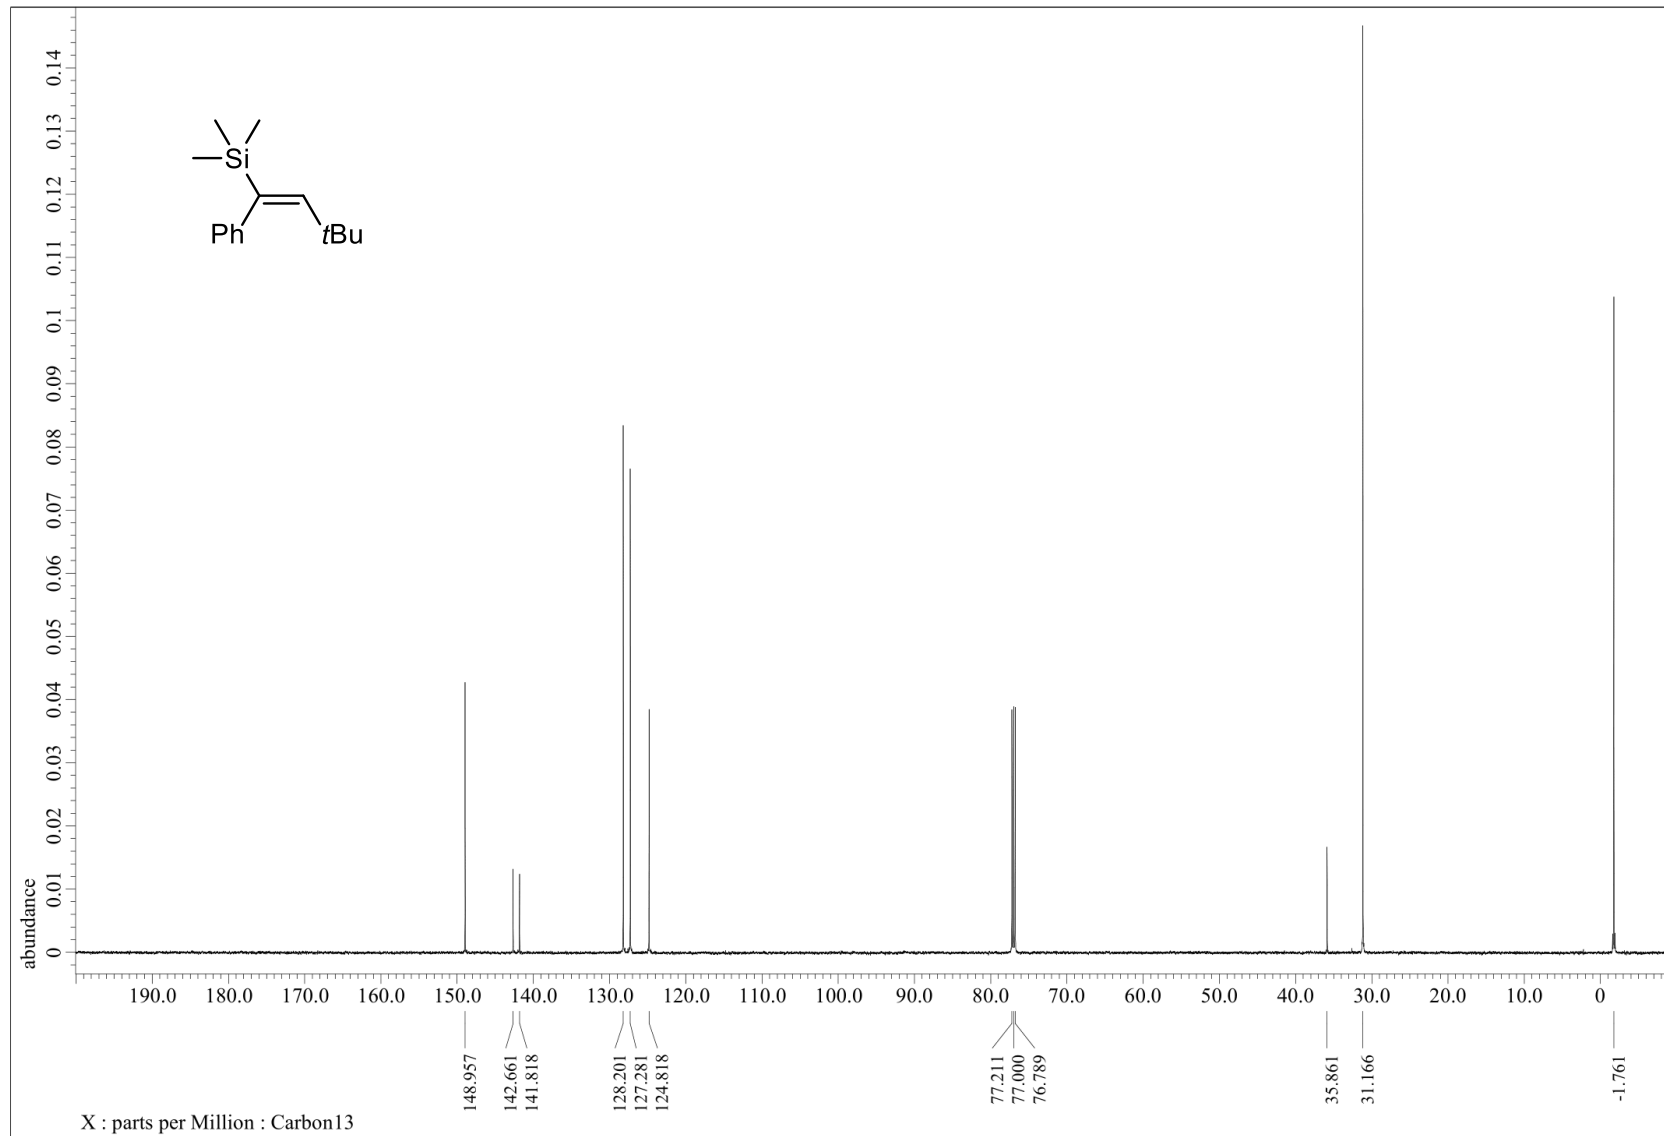

**Figure S58.** <sup>13</sup>C NMR (151 MHz, CDCl<sub>3</sub>) spectrum of **3o**

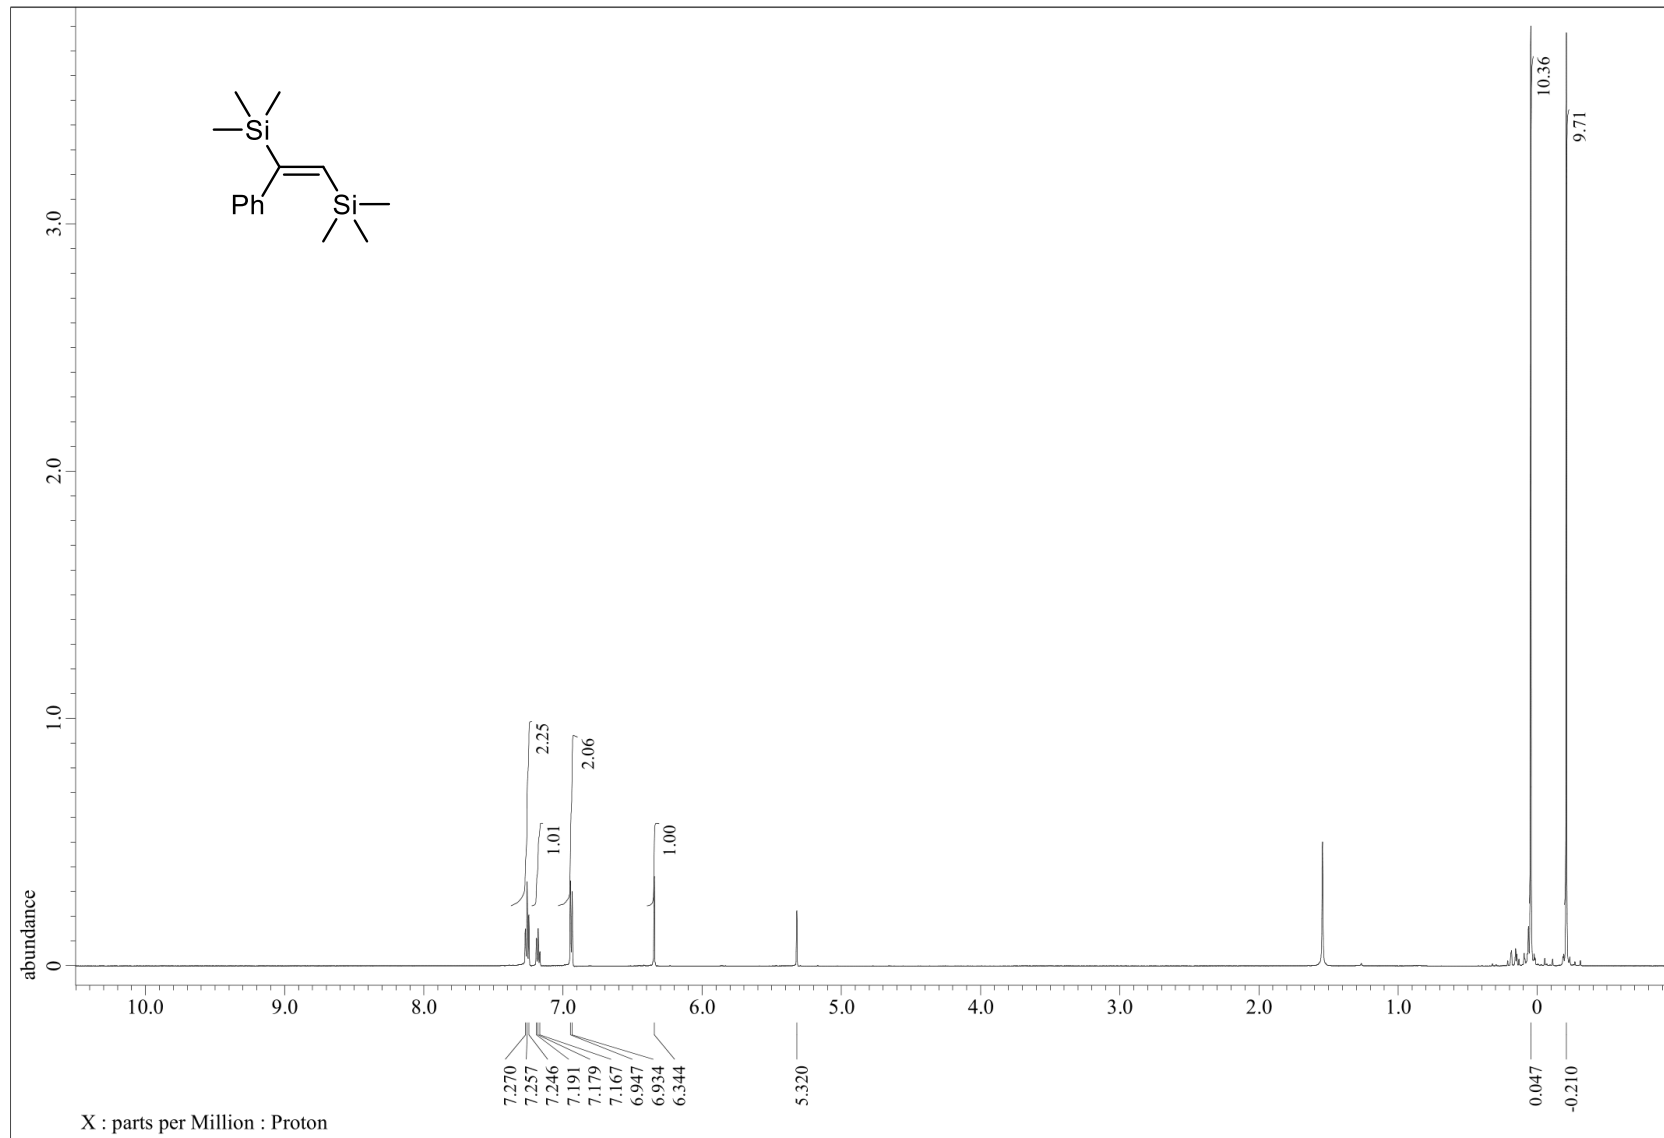

**Figure S59.**  $^1\text{H}$  NMR (600 MHz,  $\text{CD}_2\text{Cl}_2$ ) spectrum of **3p**

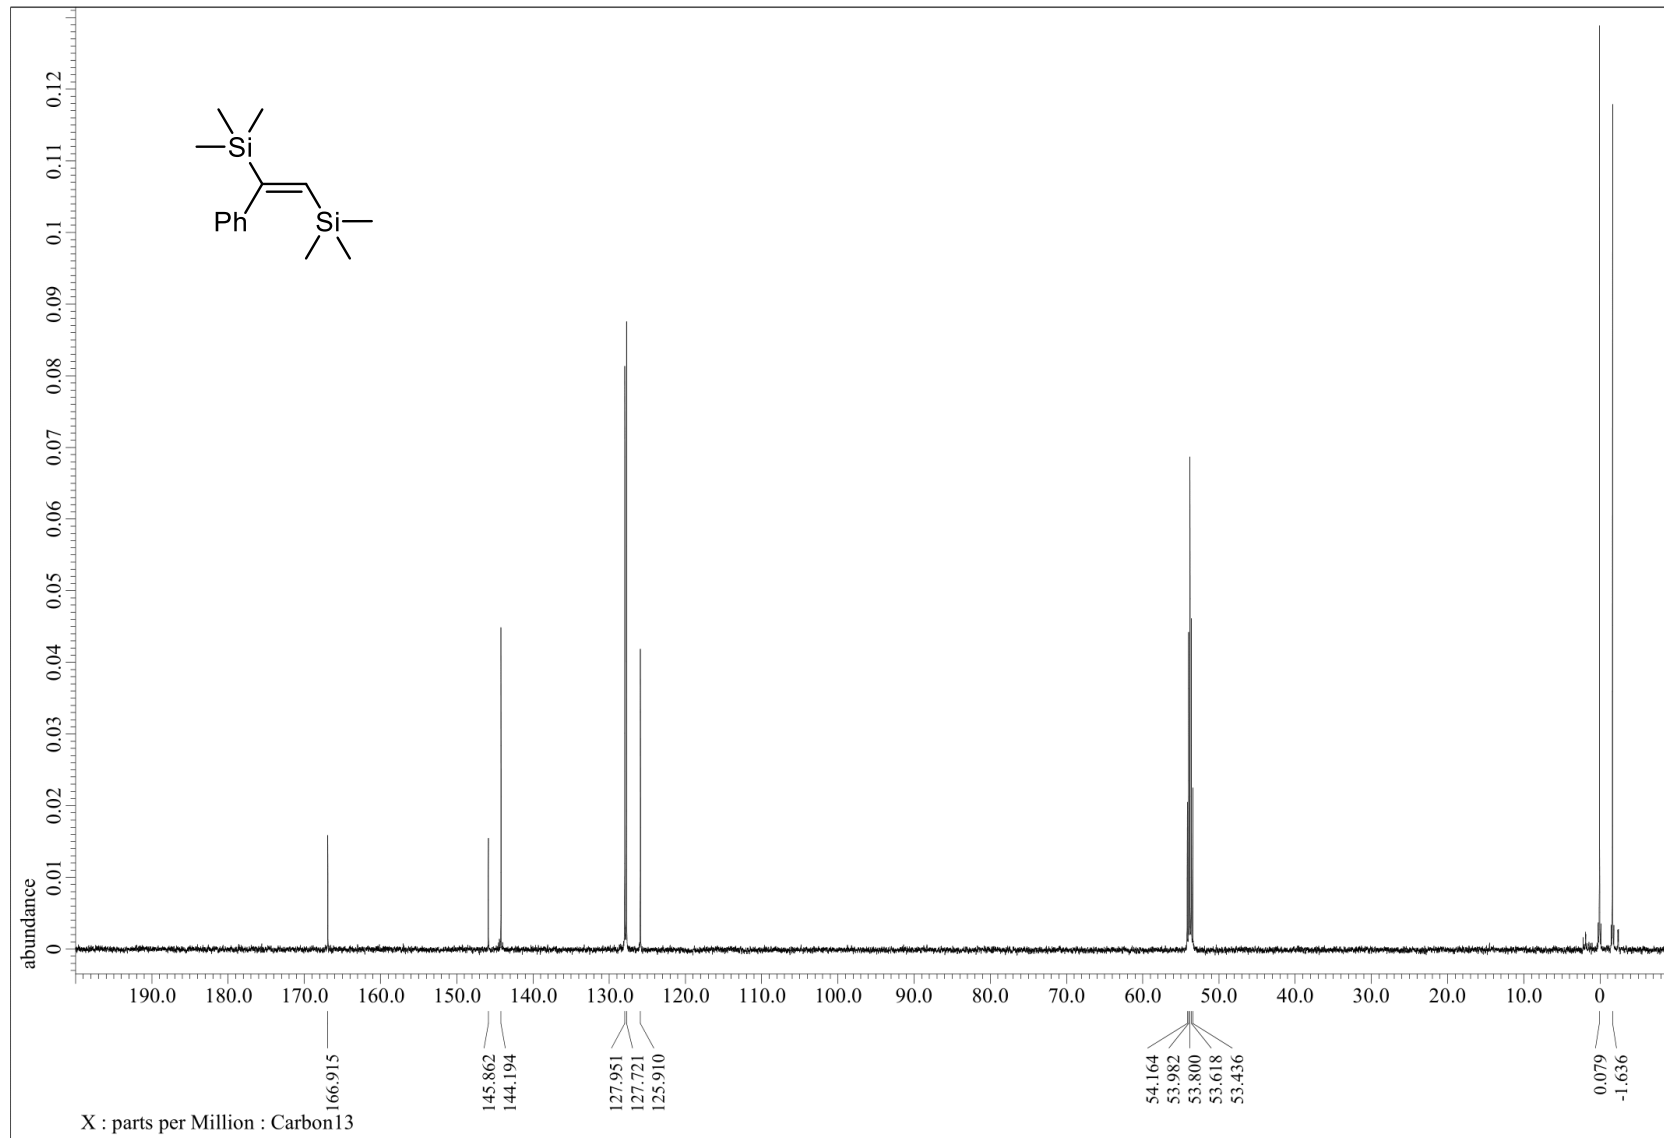

**Figure S60.**  $^{13}\text{C}$  NMR (151 MHz,  $\text{CD}_2\text{Cl}_2$ ) spectrum of **3p**



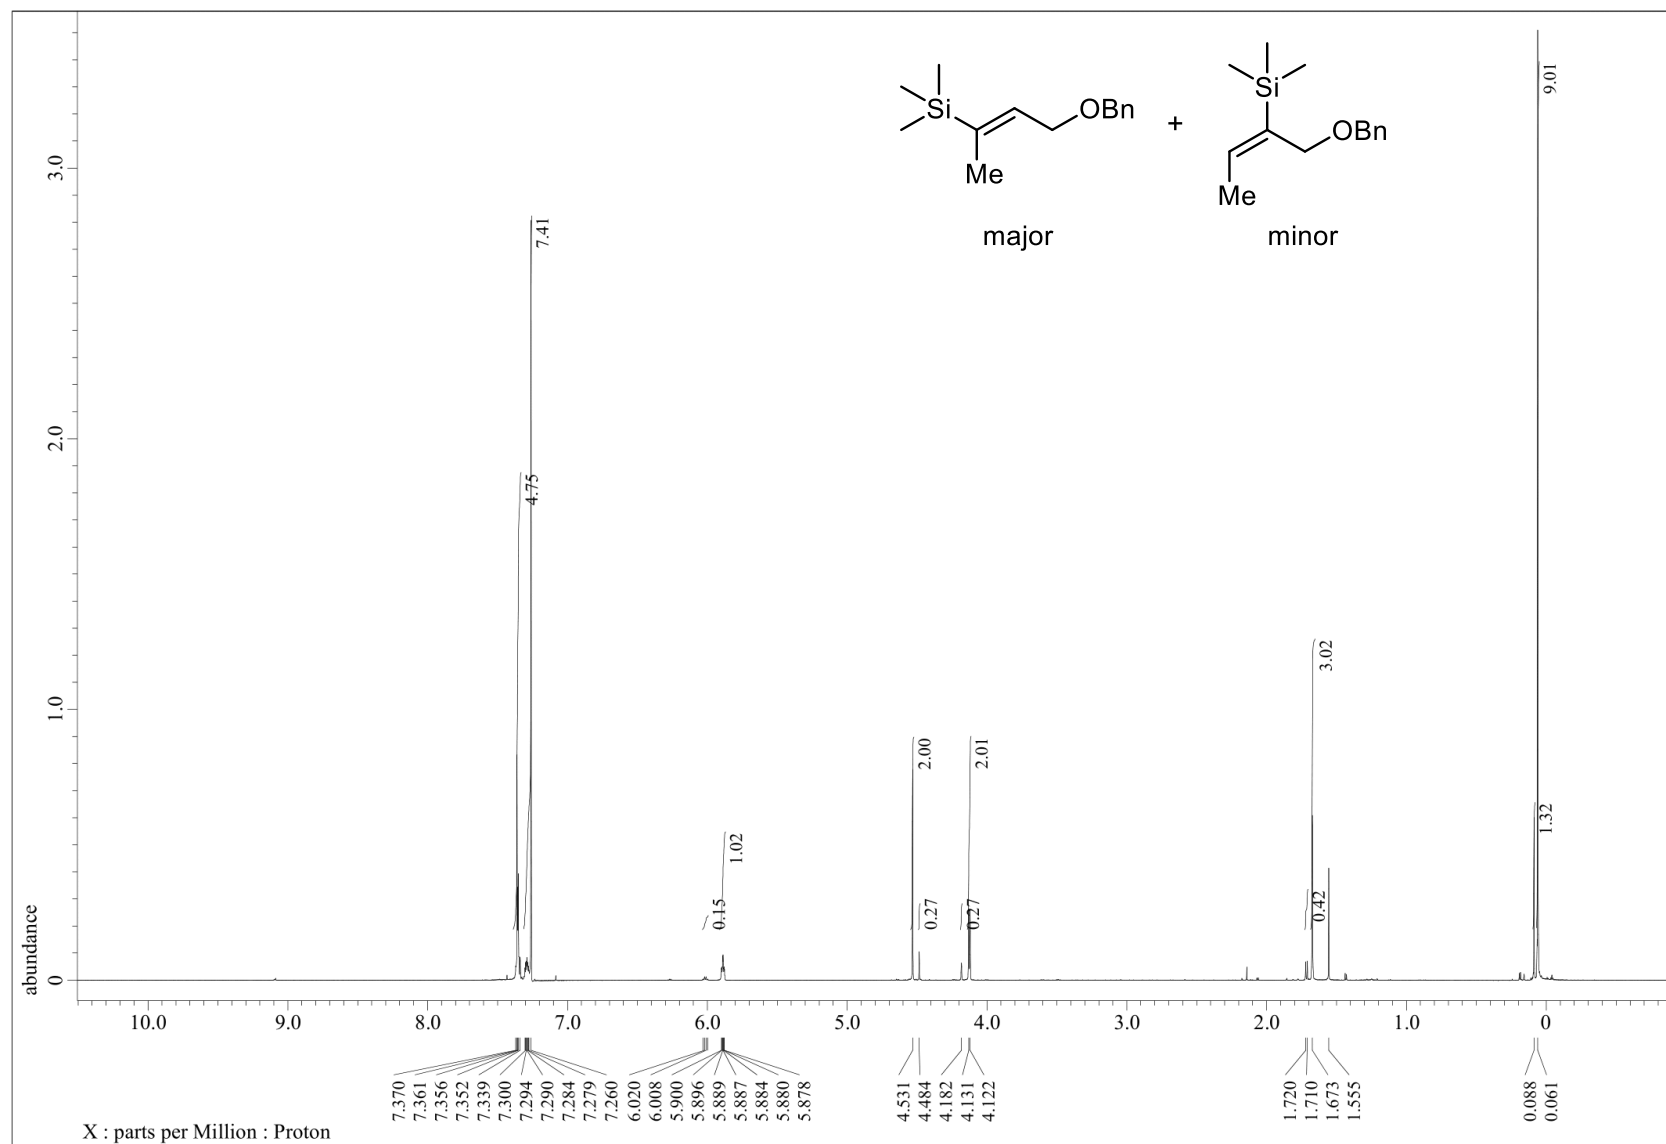

**Figure S61.**  $^1\text{H}$  NMR (600 MHz,  $\text{CDCl}_3$ ) spectrum of **3q**

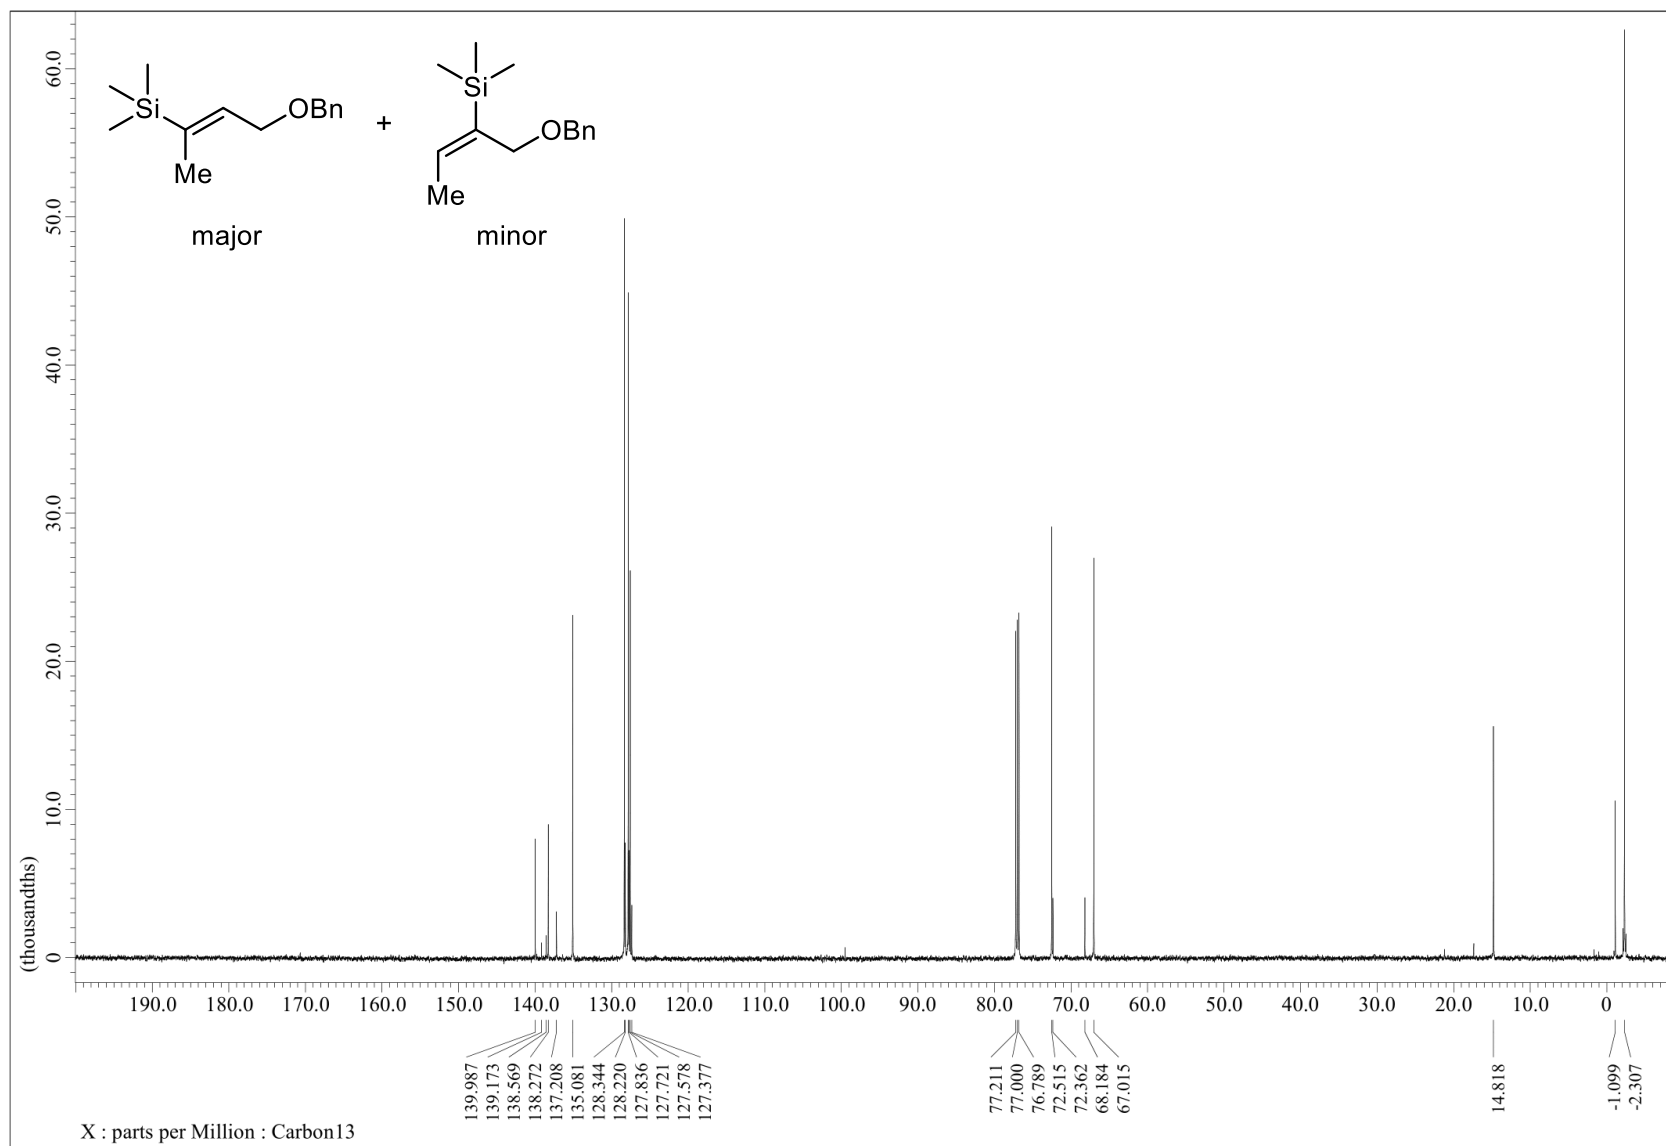

Figure S62.  $^{13}\text{C}$  NMR (151 MHz,  $\text{CDCl}_3$ ) spectrum of **3q**

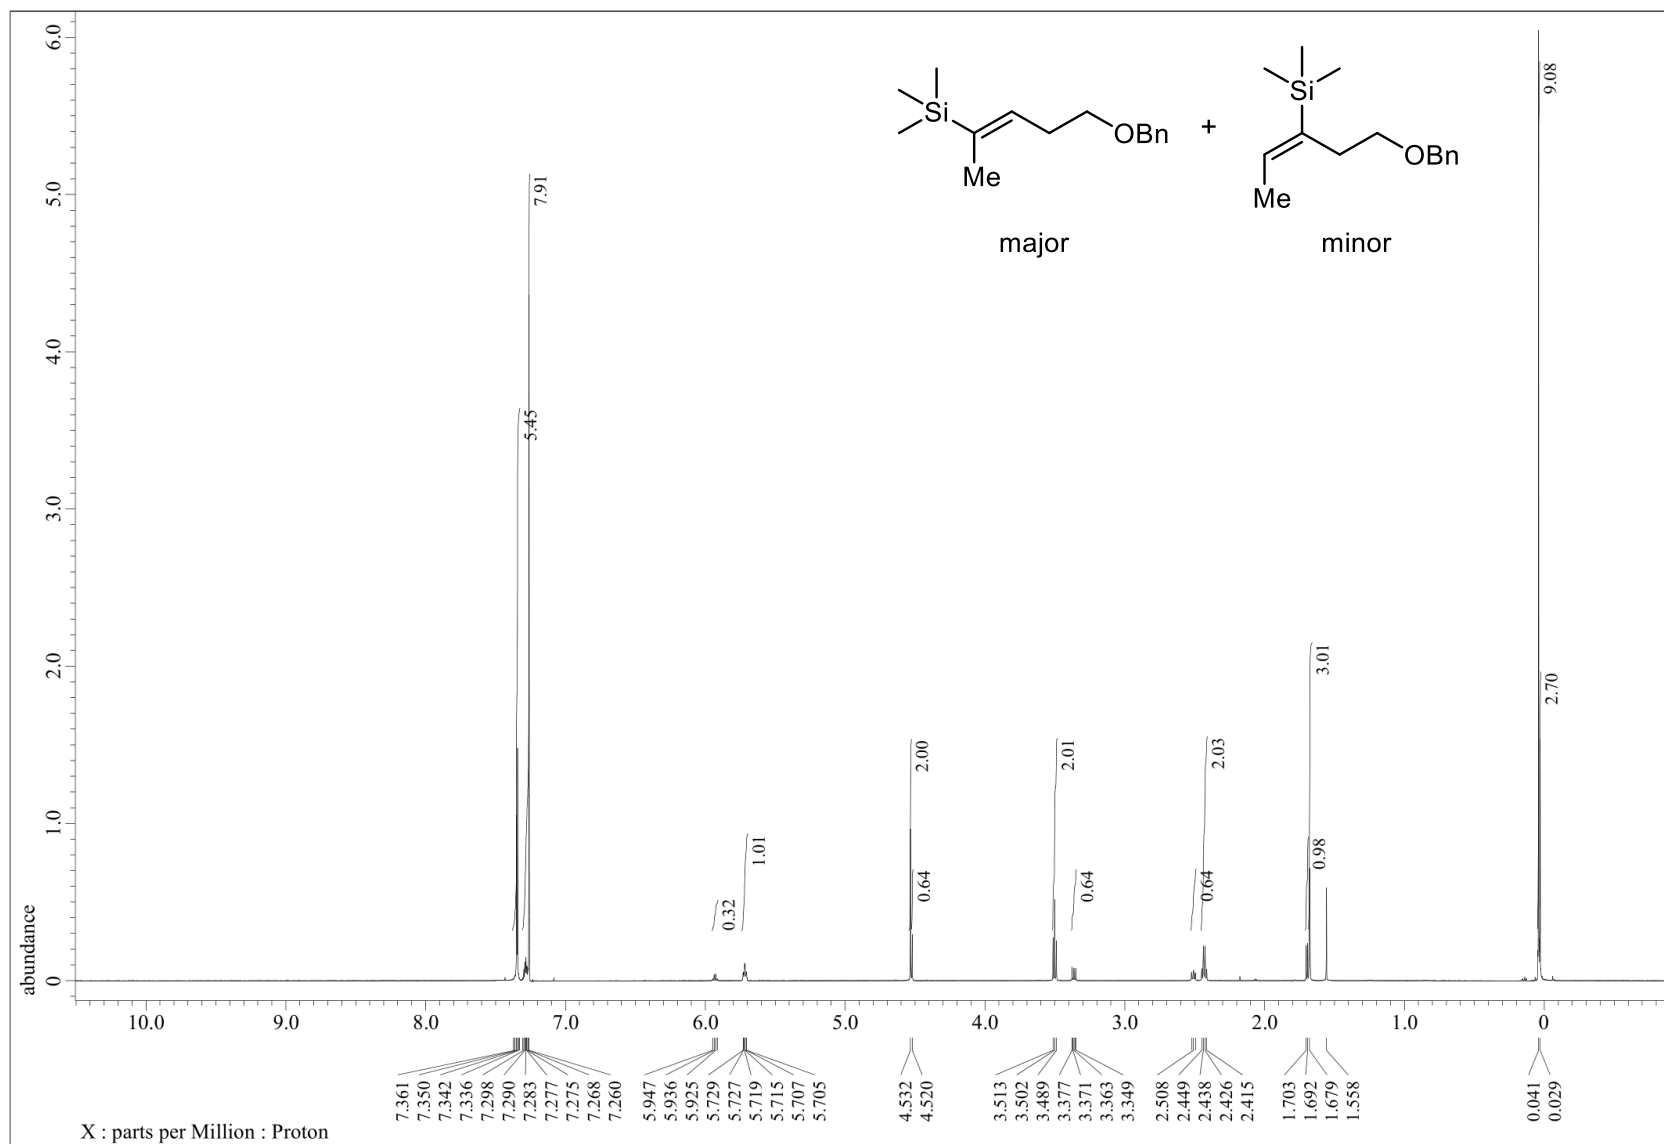

Figure S63.  $^1\text{H}$  NMR (600 MHz,  $\text{CDCl}_3$ ) spectrum of **3r**

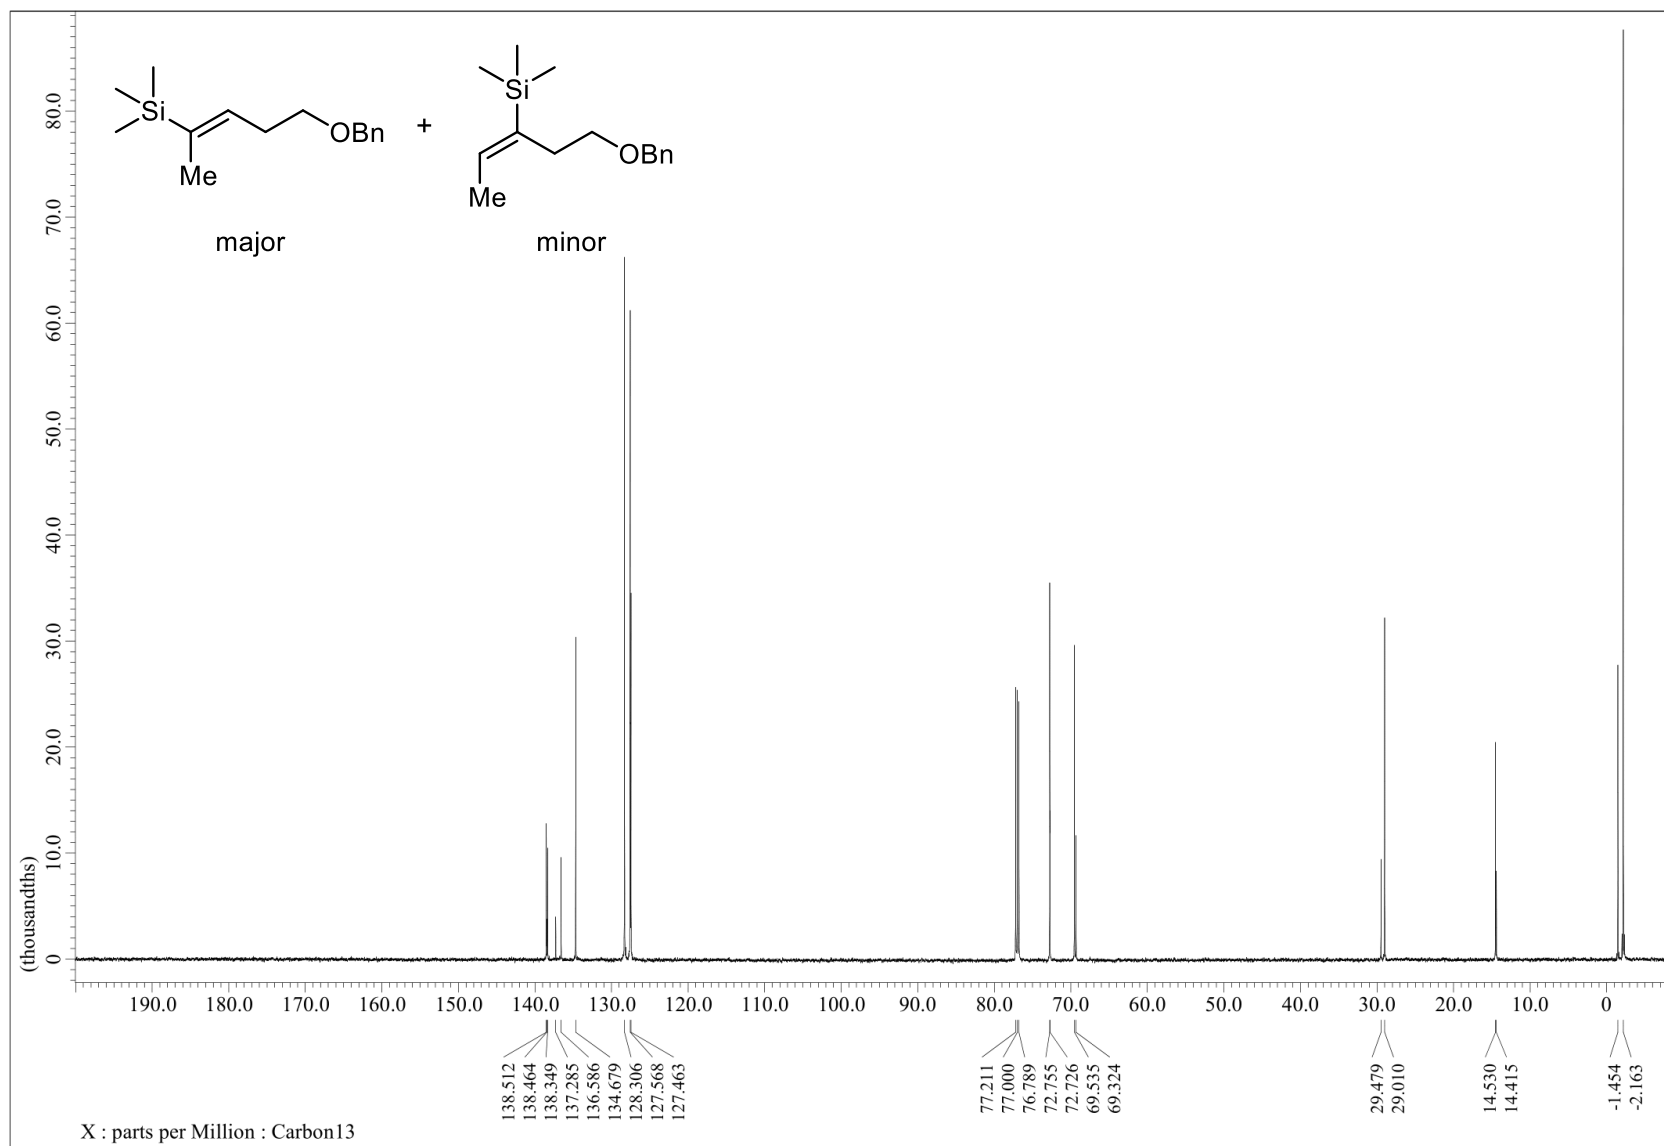

Figure S64. <sup>13</sup>C NMR (151 MHz, CDCl<sub>3</sub>) spectrum of **3r**

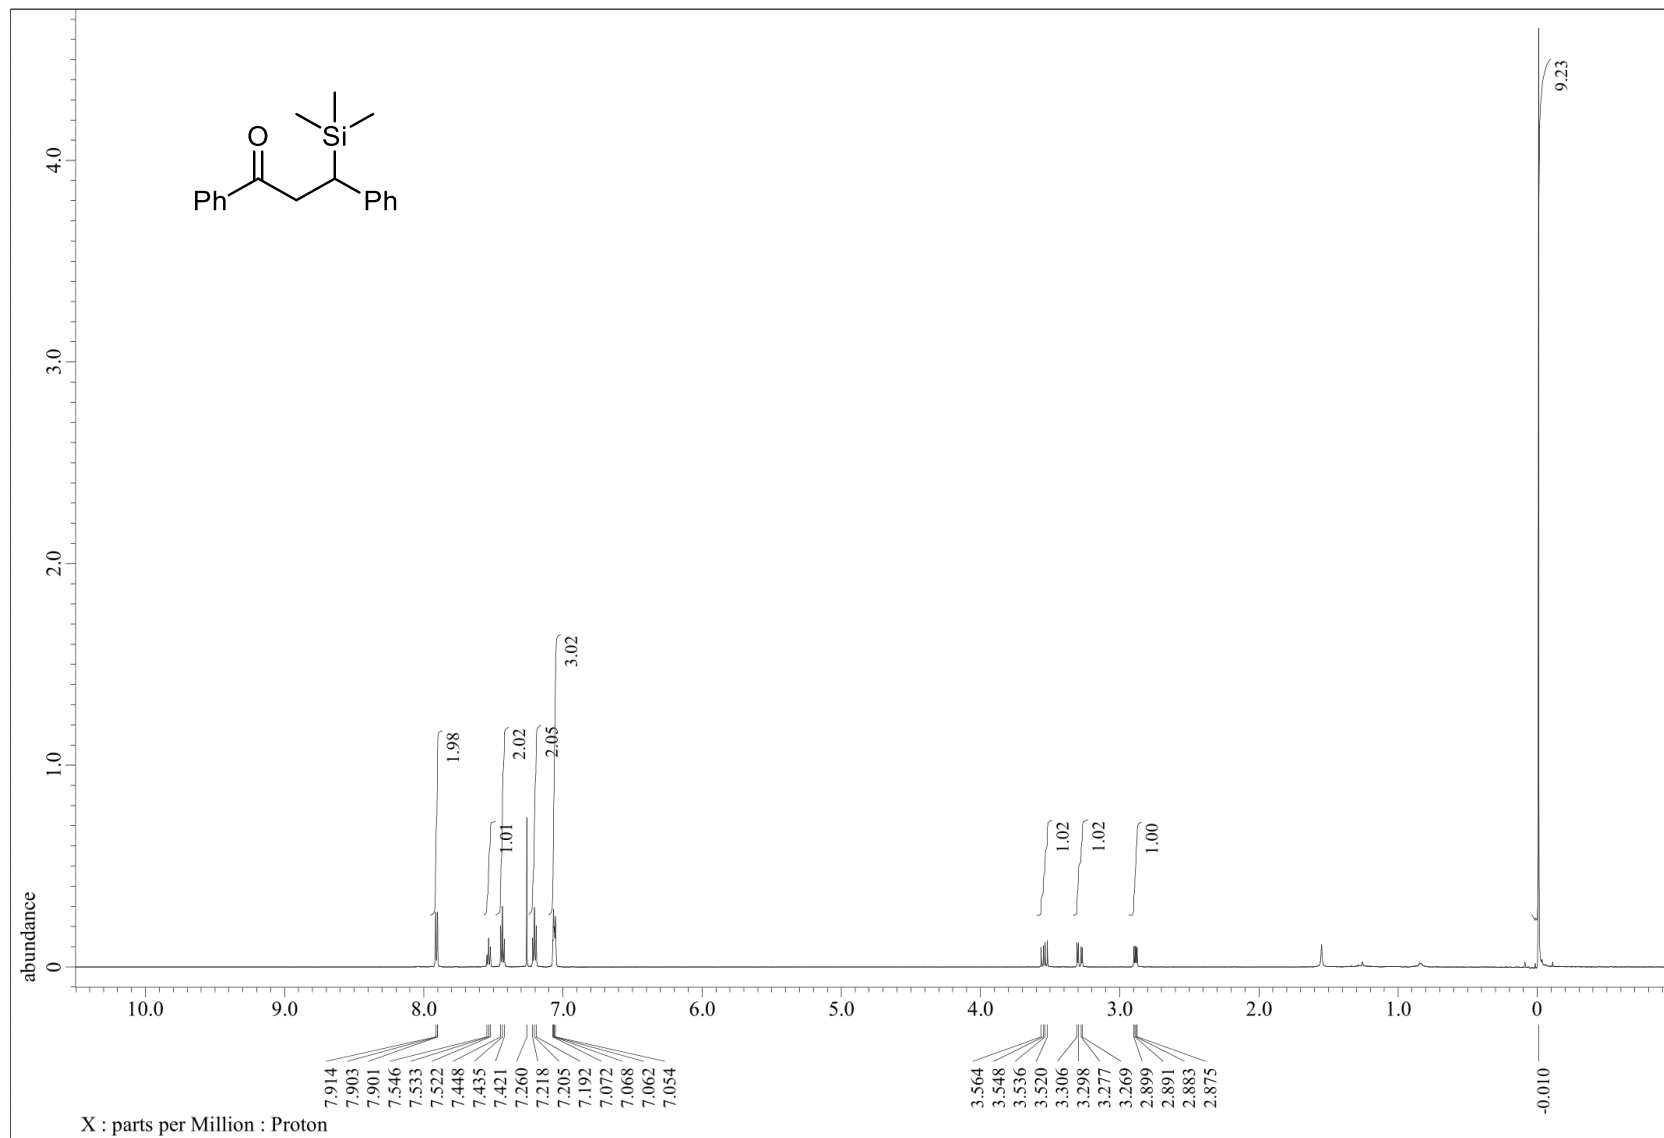

**Figure S65.** <sup>1</sup>H NMR (600 MHz, CDCl<sub>3</sub>) spectrum of **3s**

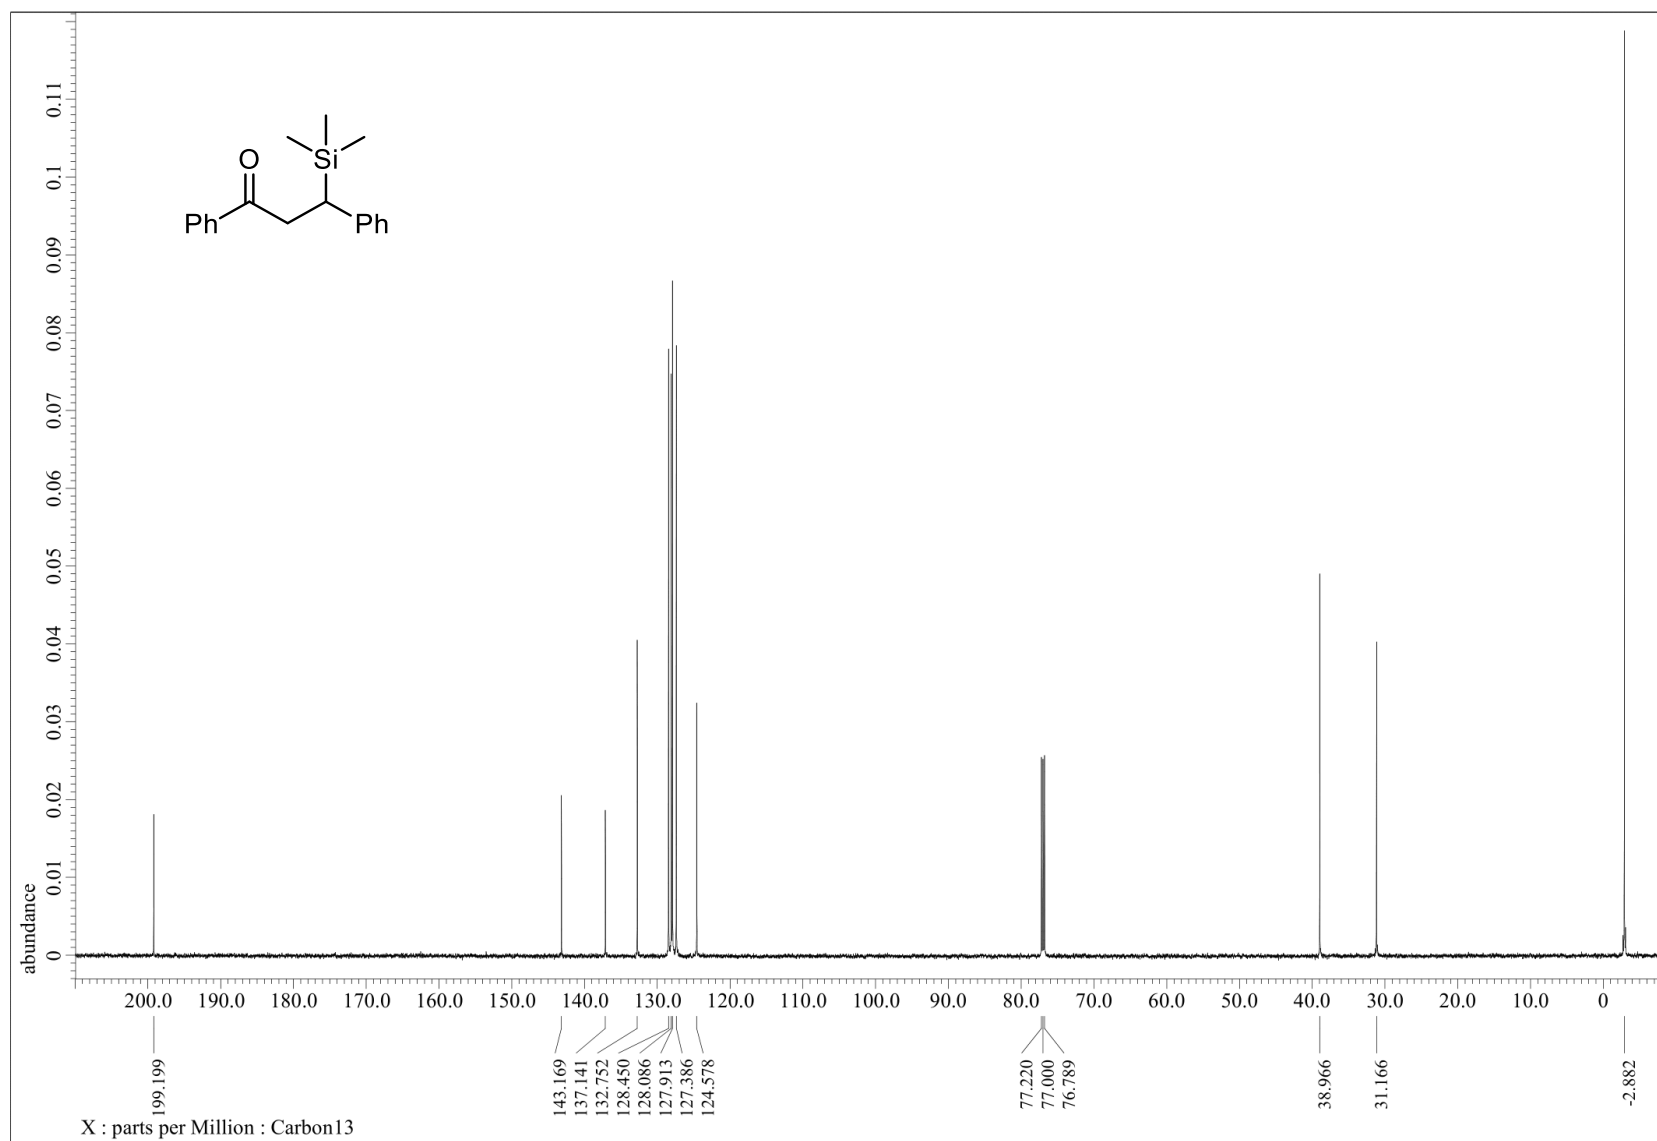

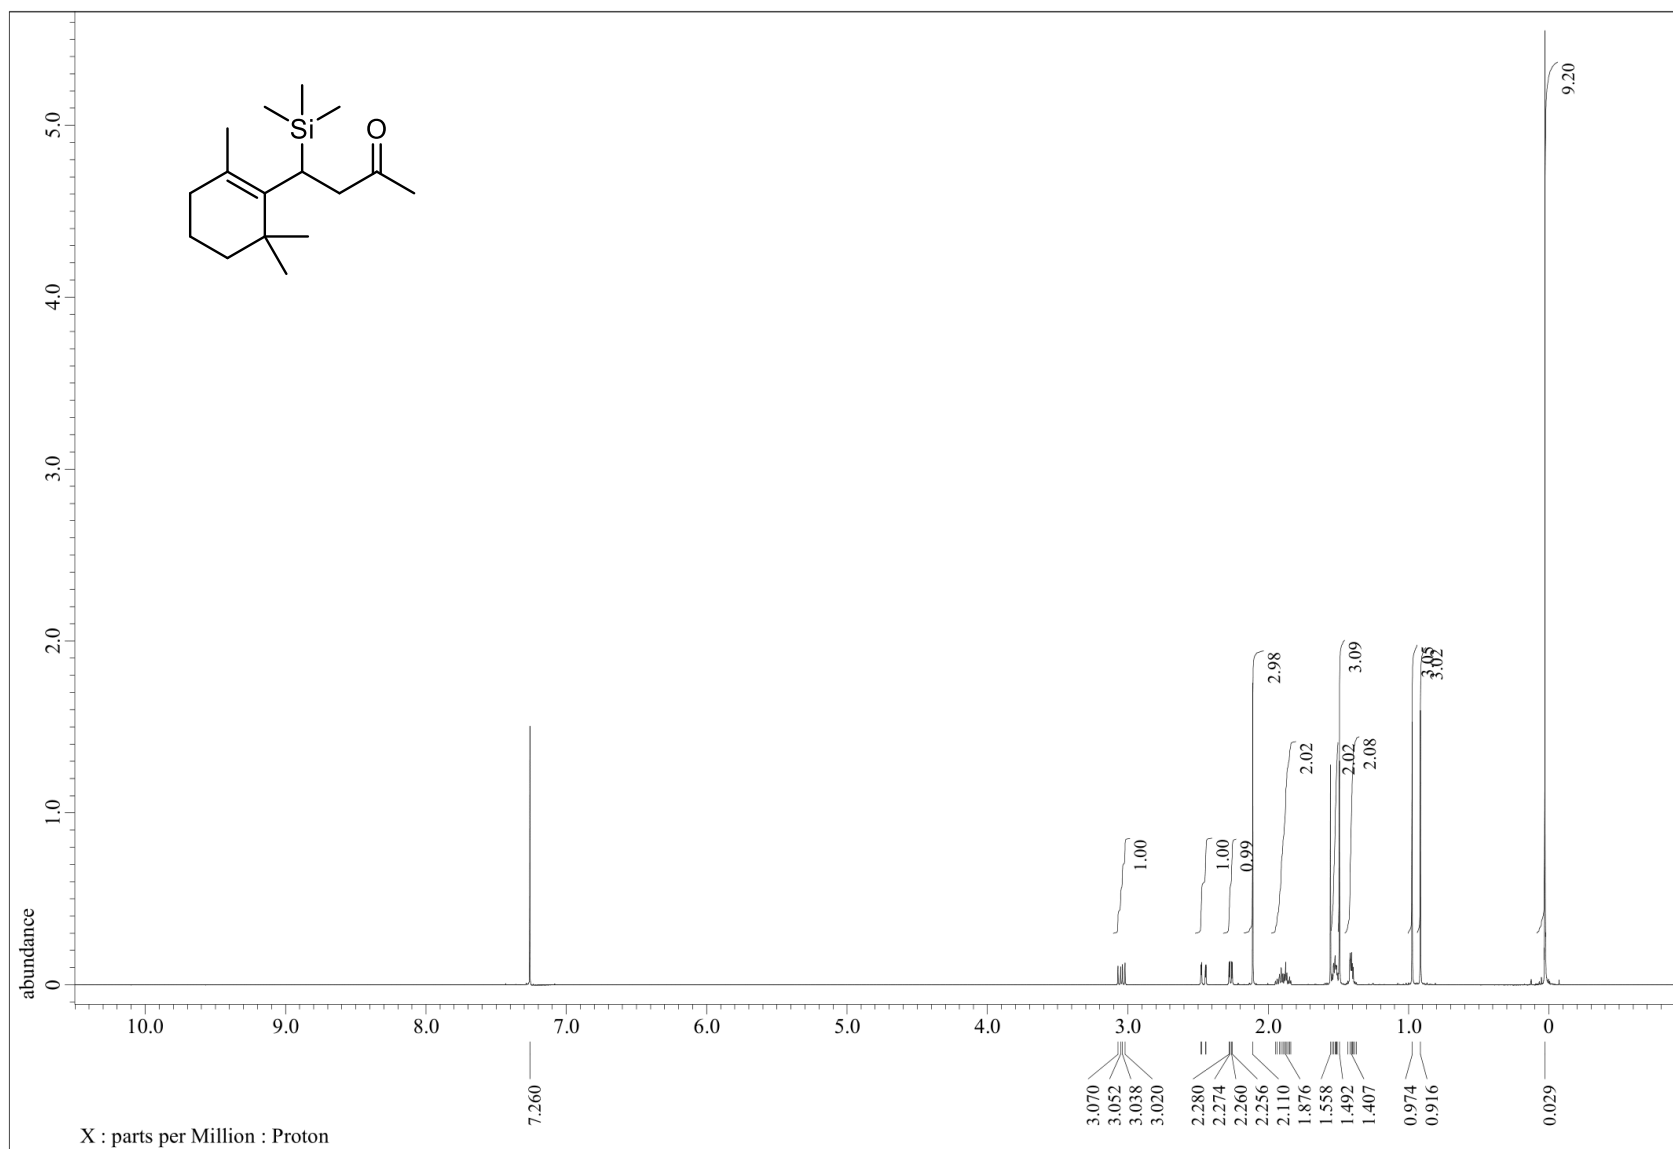

**Figure S67.** <sup>1</sup>H NMR (600 MHz, CDCl<sub>3</sub>) spectrum of **3t**

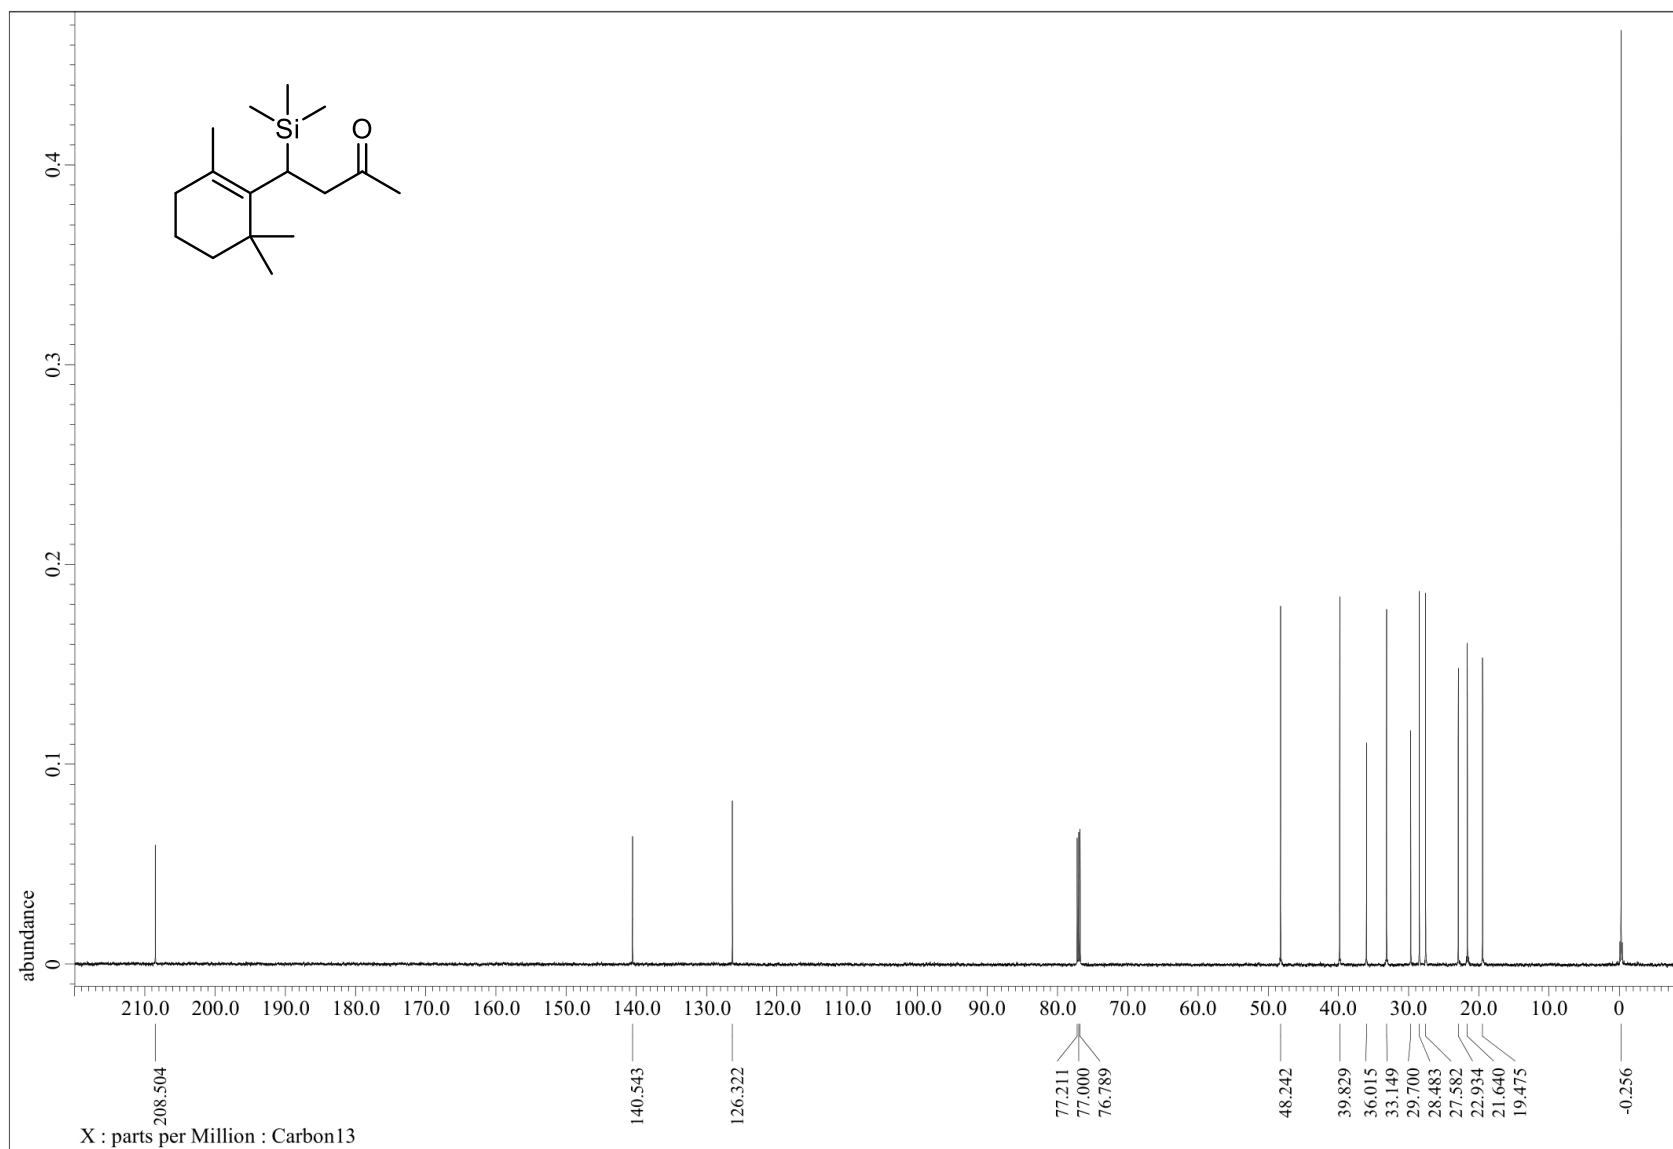

**Figure S68.**  $^{13}\text{C}$  NMR (151 MHz,  $\text{CDCl}_3$ ) spectrum of **3t**



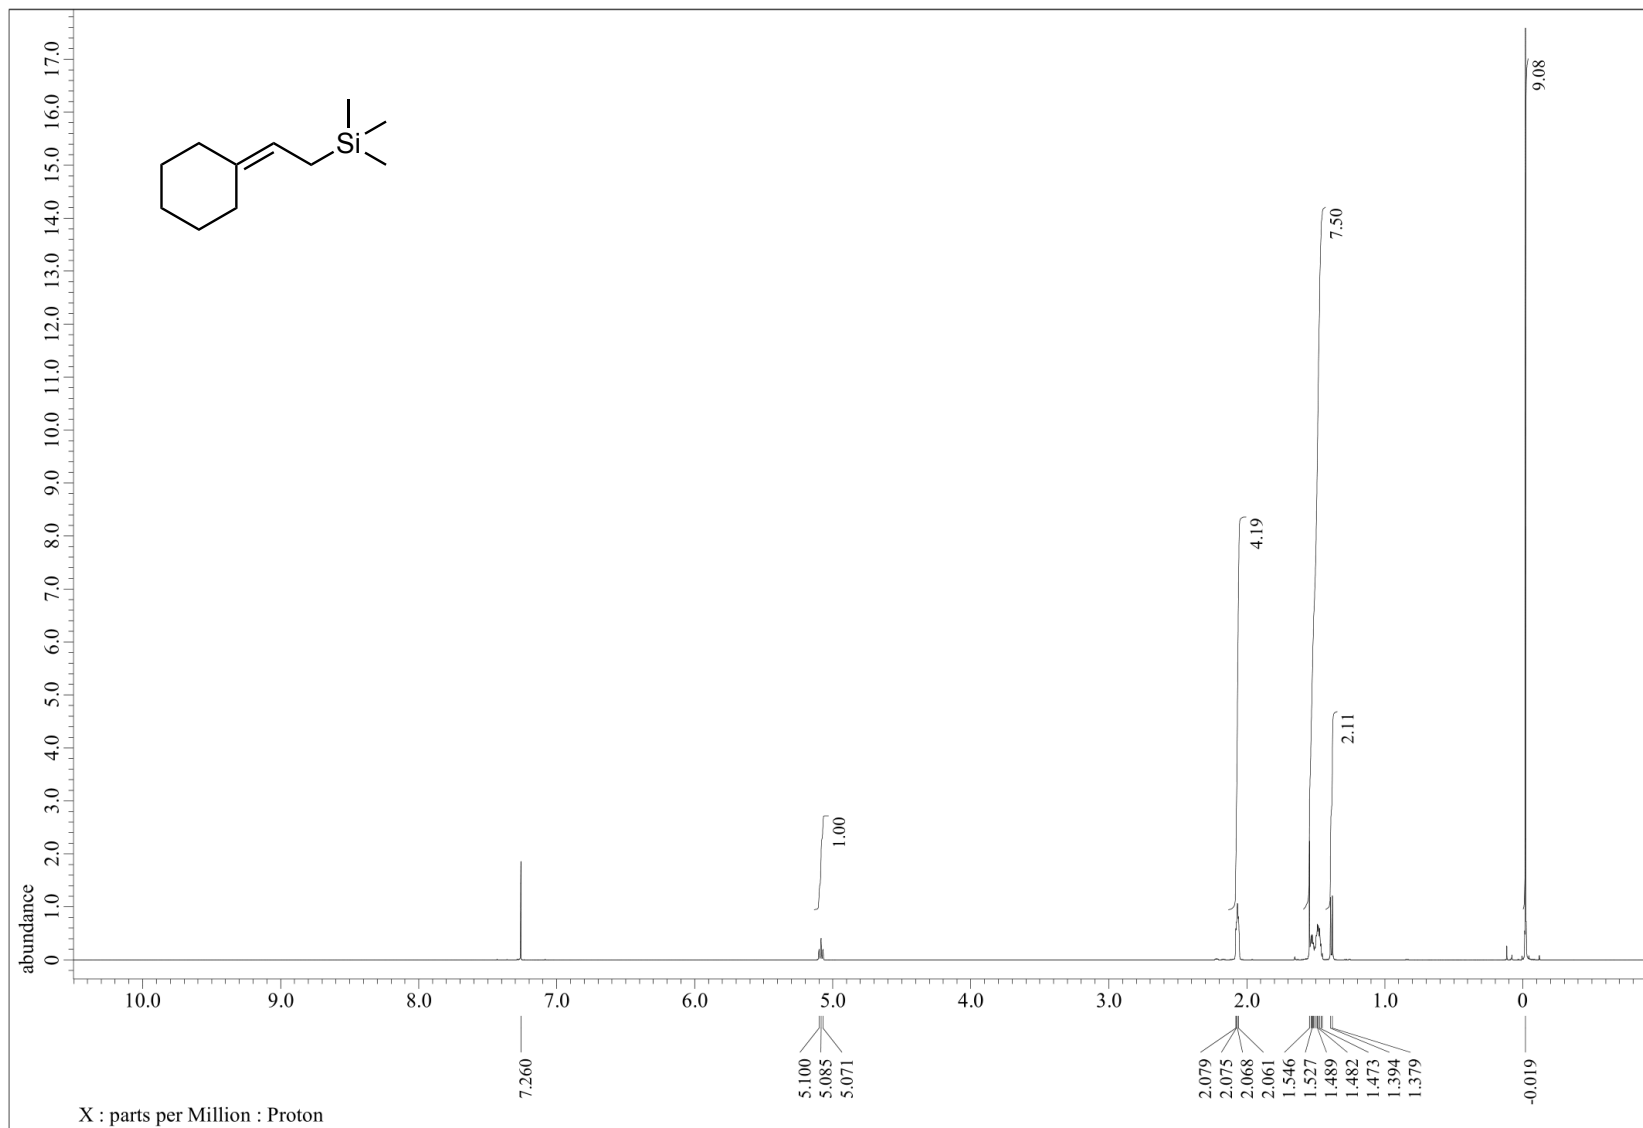

Figure S69. <sup>1</sup>H NMR (600 MHz, CDCl<sub>3</sub>) spectrum of 3u

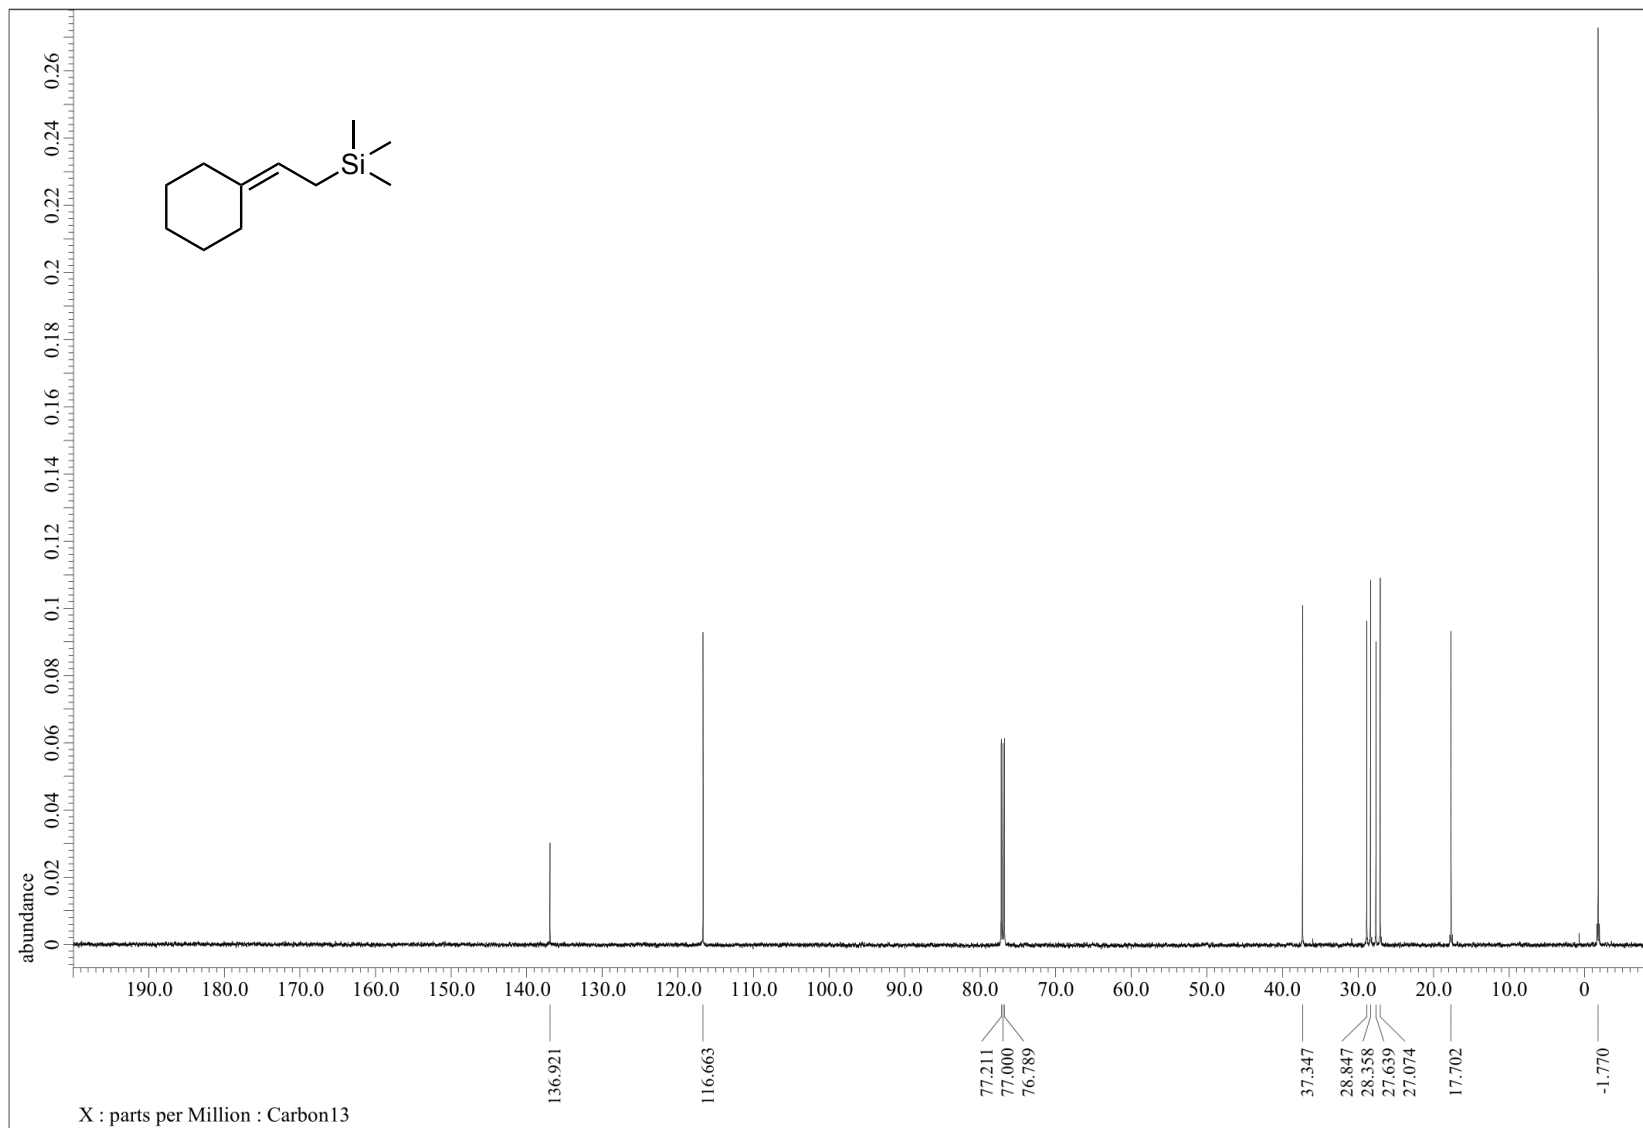

**Figure S70.** <sup>13</sup>C NMR (151 MHz, CDCl<sub>3</sub>) spectrum of **3u**

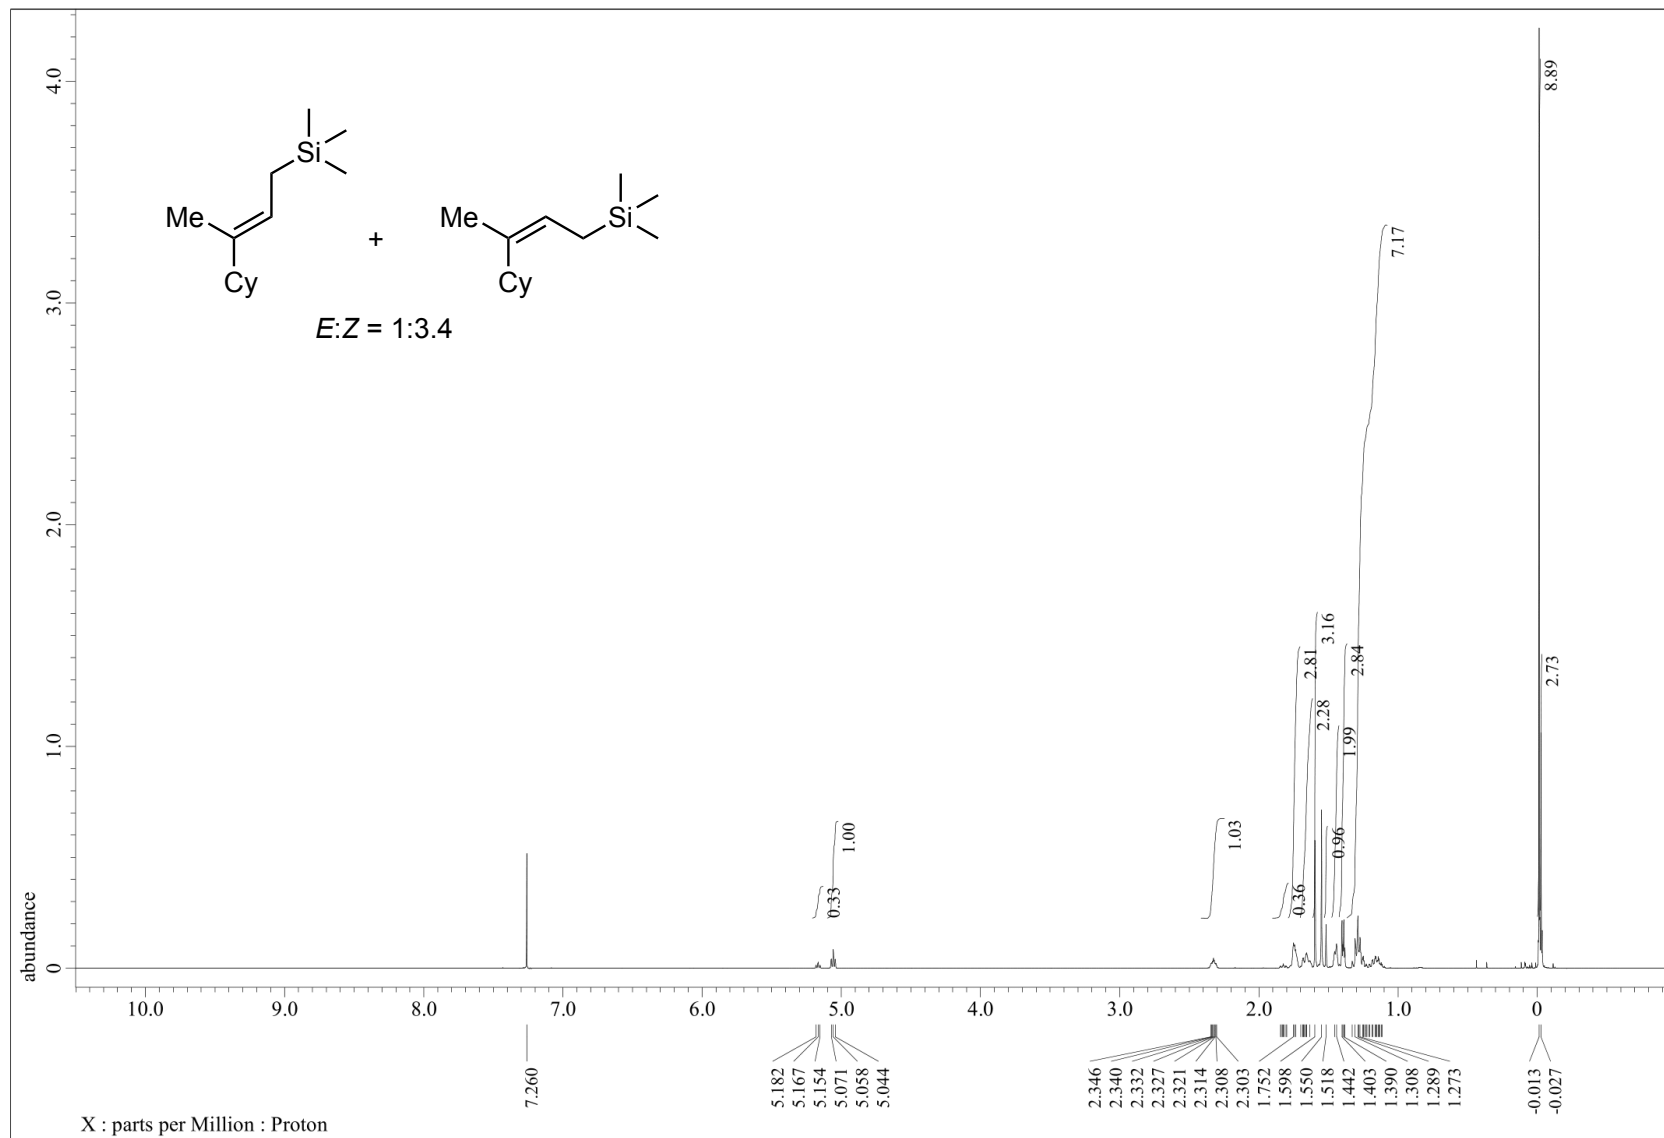

Figure S71. <sup>1</sup>H NMR (600 MHz, CDCl<sub>3</sub>) spectrum of 3v

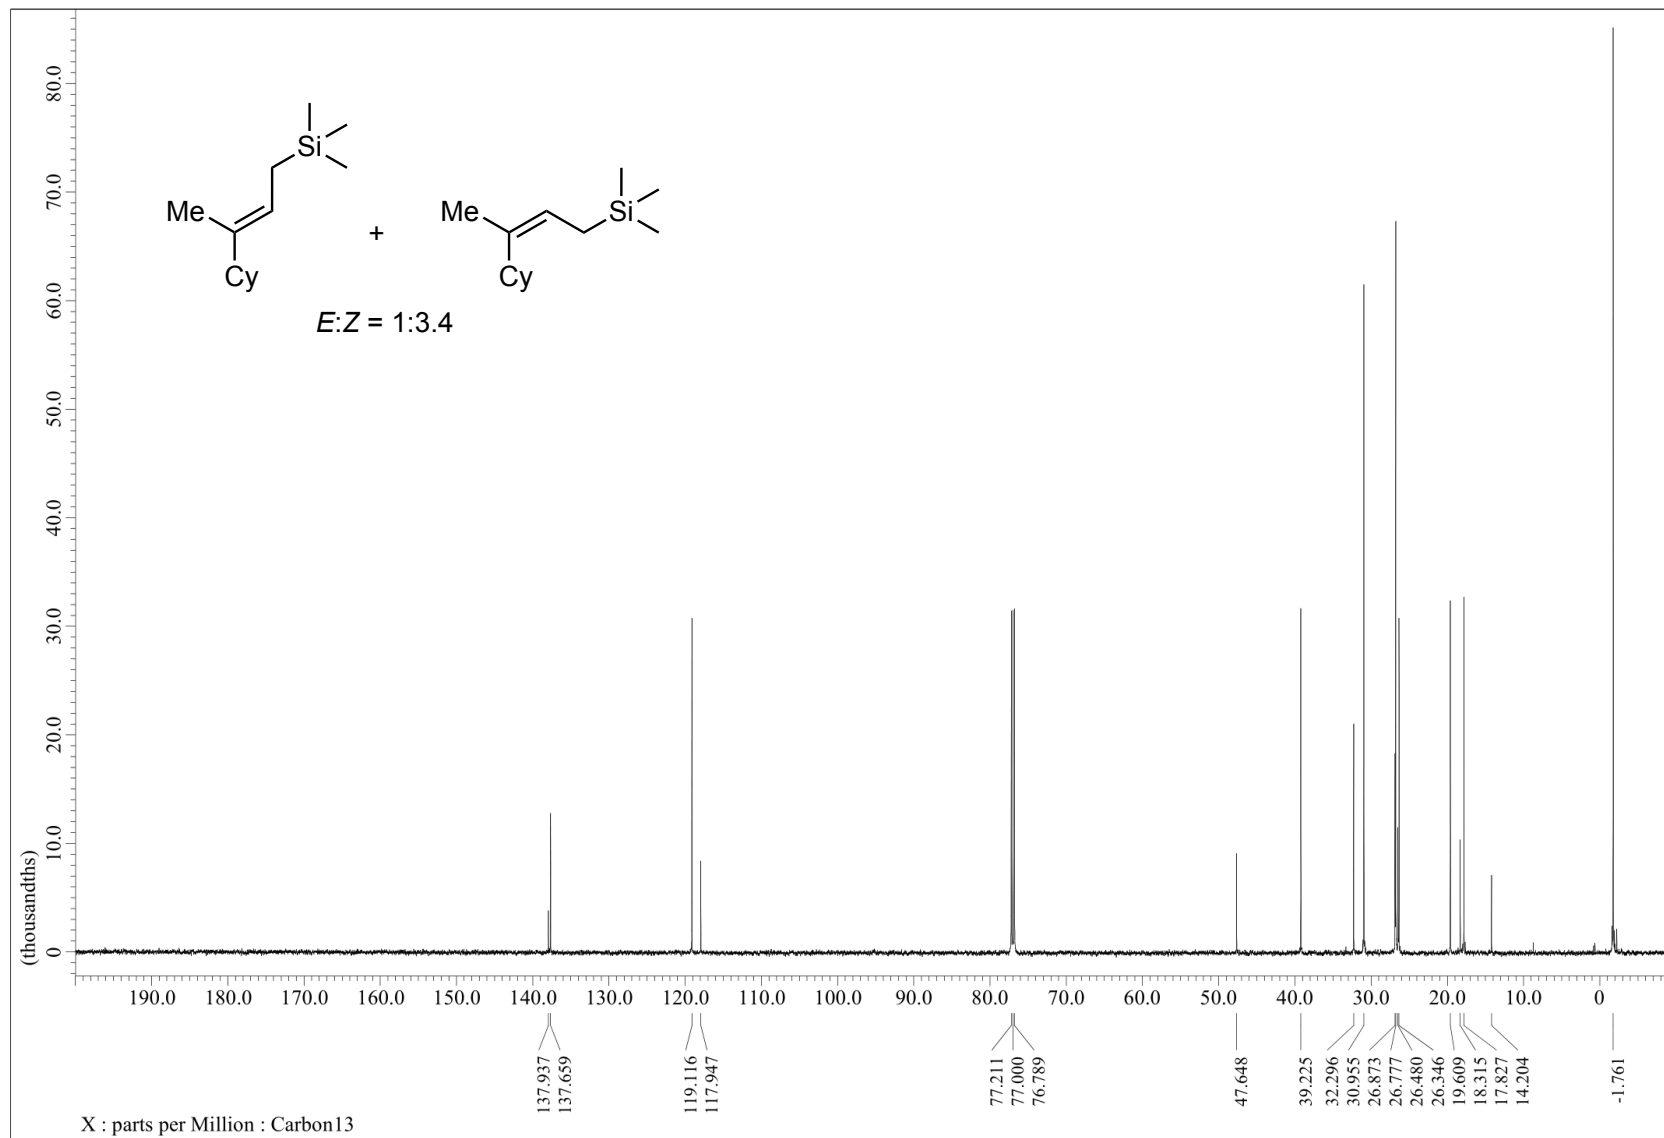

Figure S72. <sup>13</sup>C NMR (151 MHz, CDCl<sub>3</sub>) spectrum of 3v

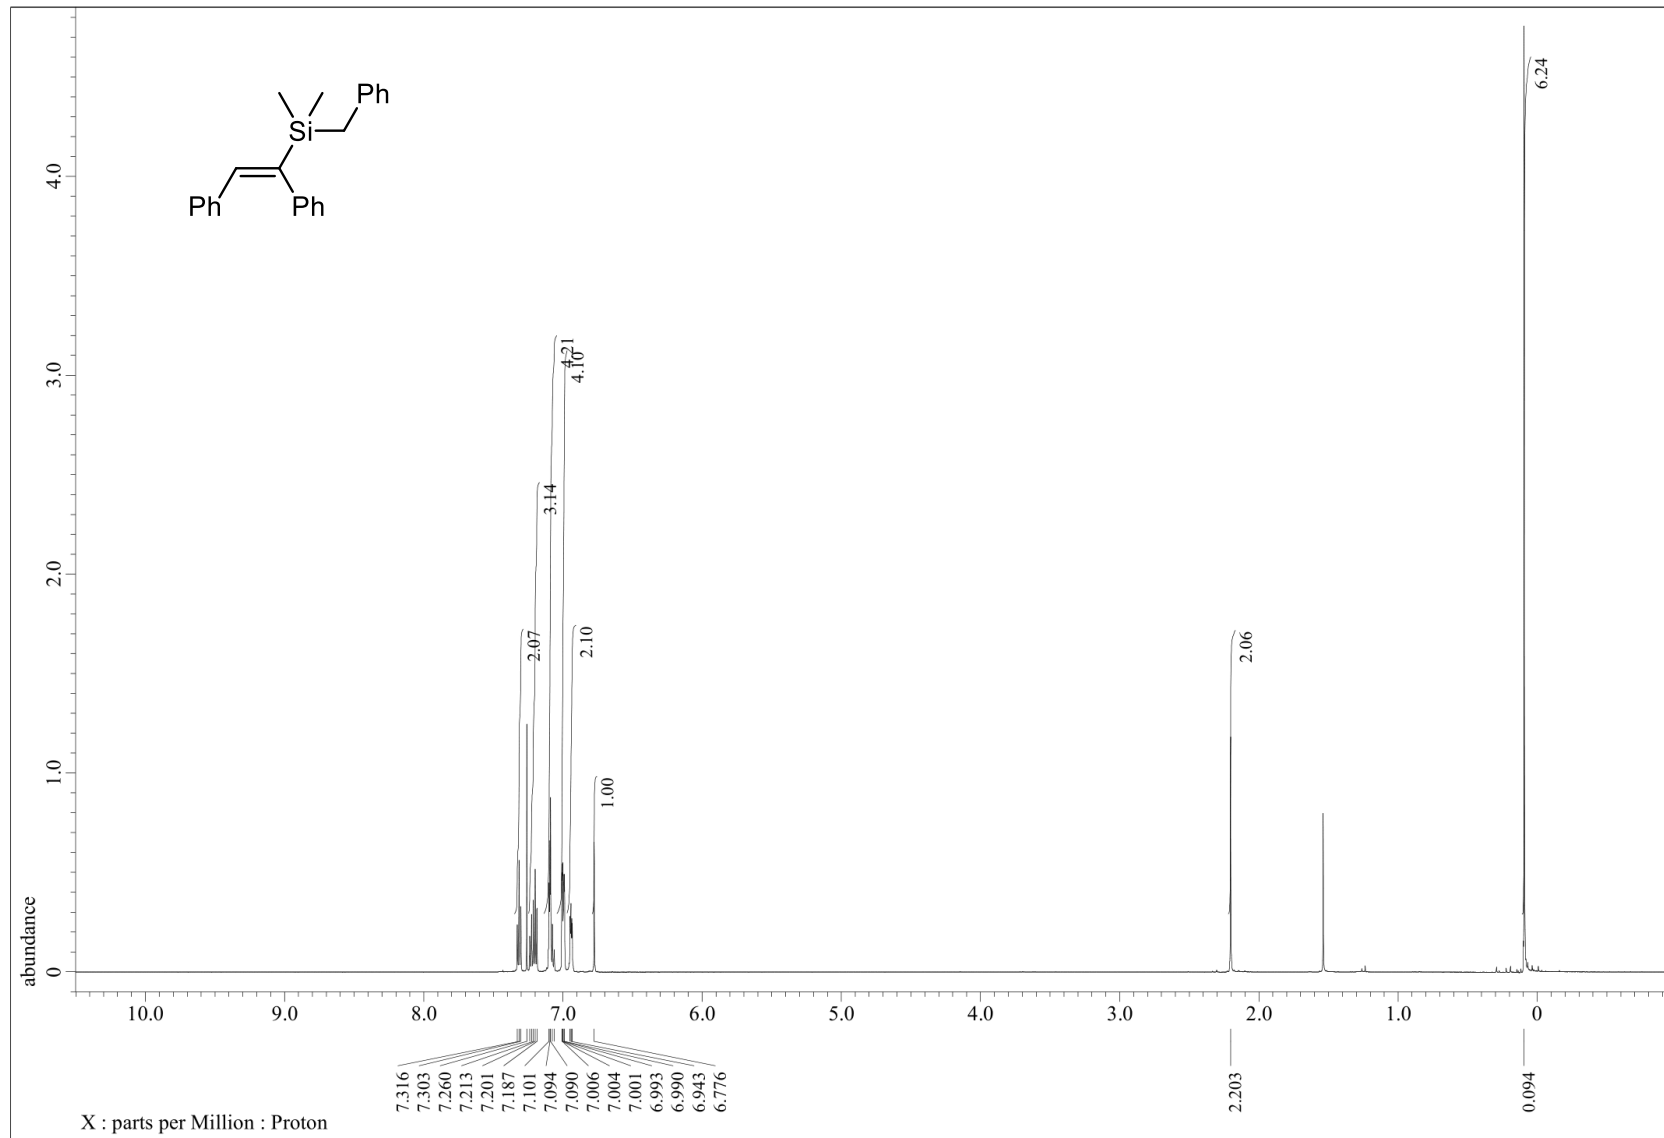

Figure S73.  $^1\text{H}$  NMR (600 MHz,  $\text{CDCl}_3$ ) spectrum of **3w**

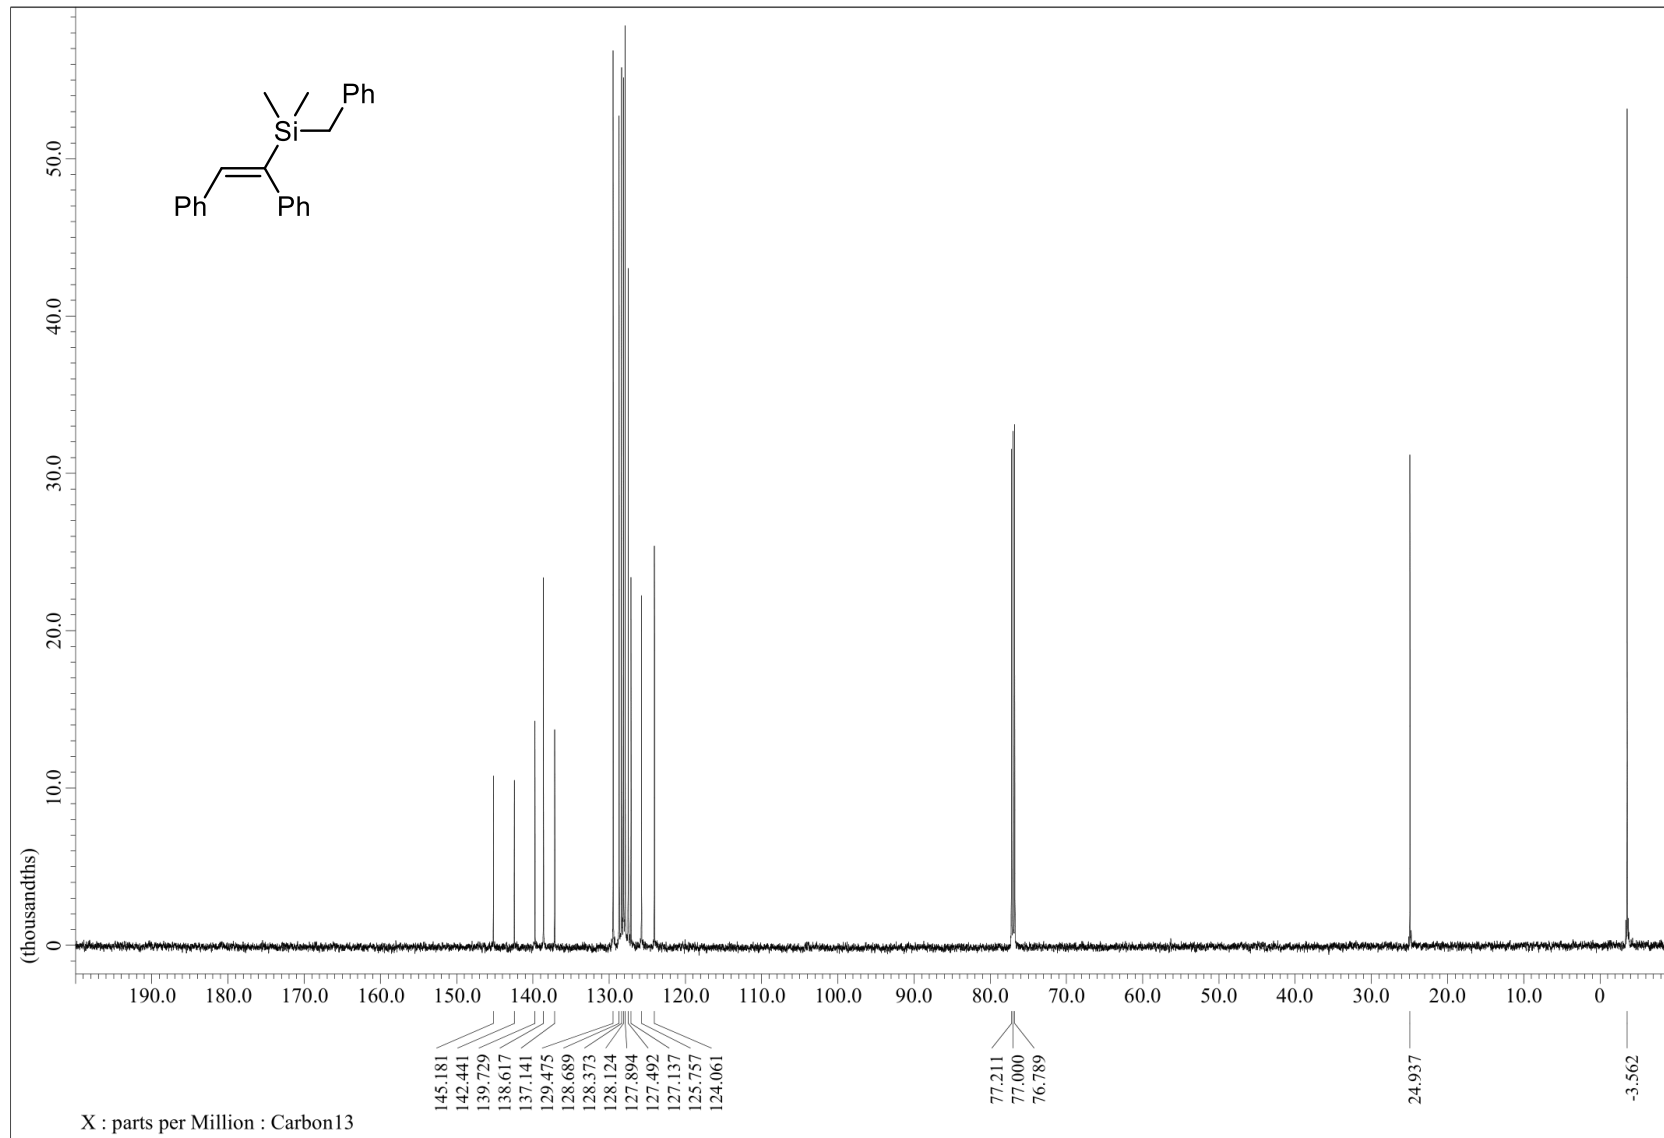

Figure S74.  $^{13}\text{C}$  NMR (151 MHz,  $\text{CDCl}_3$ ) spectrum of **3w**

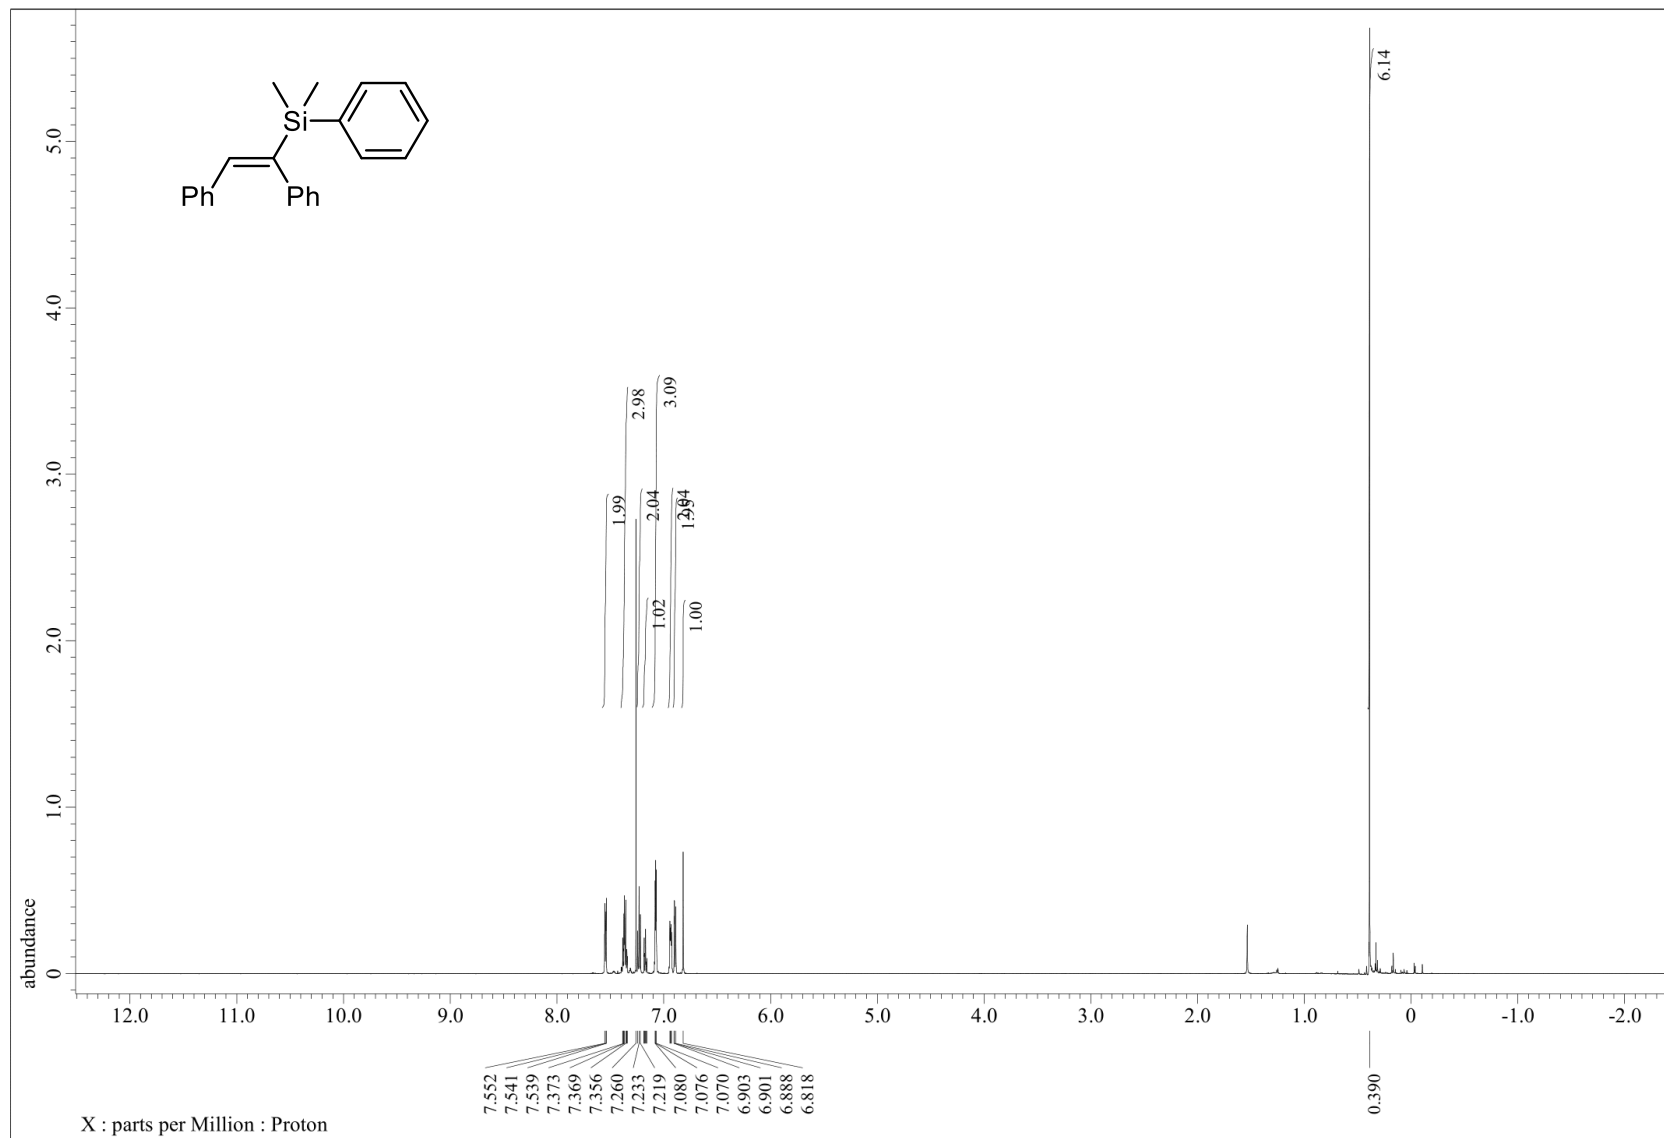

Figure S75.  $^1\text{H}$  NMR (600 MHz,  $\text{CDCl}_3$ ) spectrum of **3x**

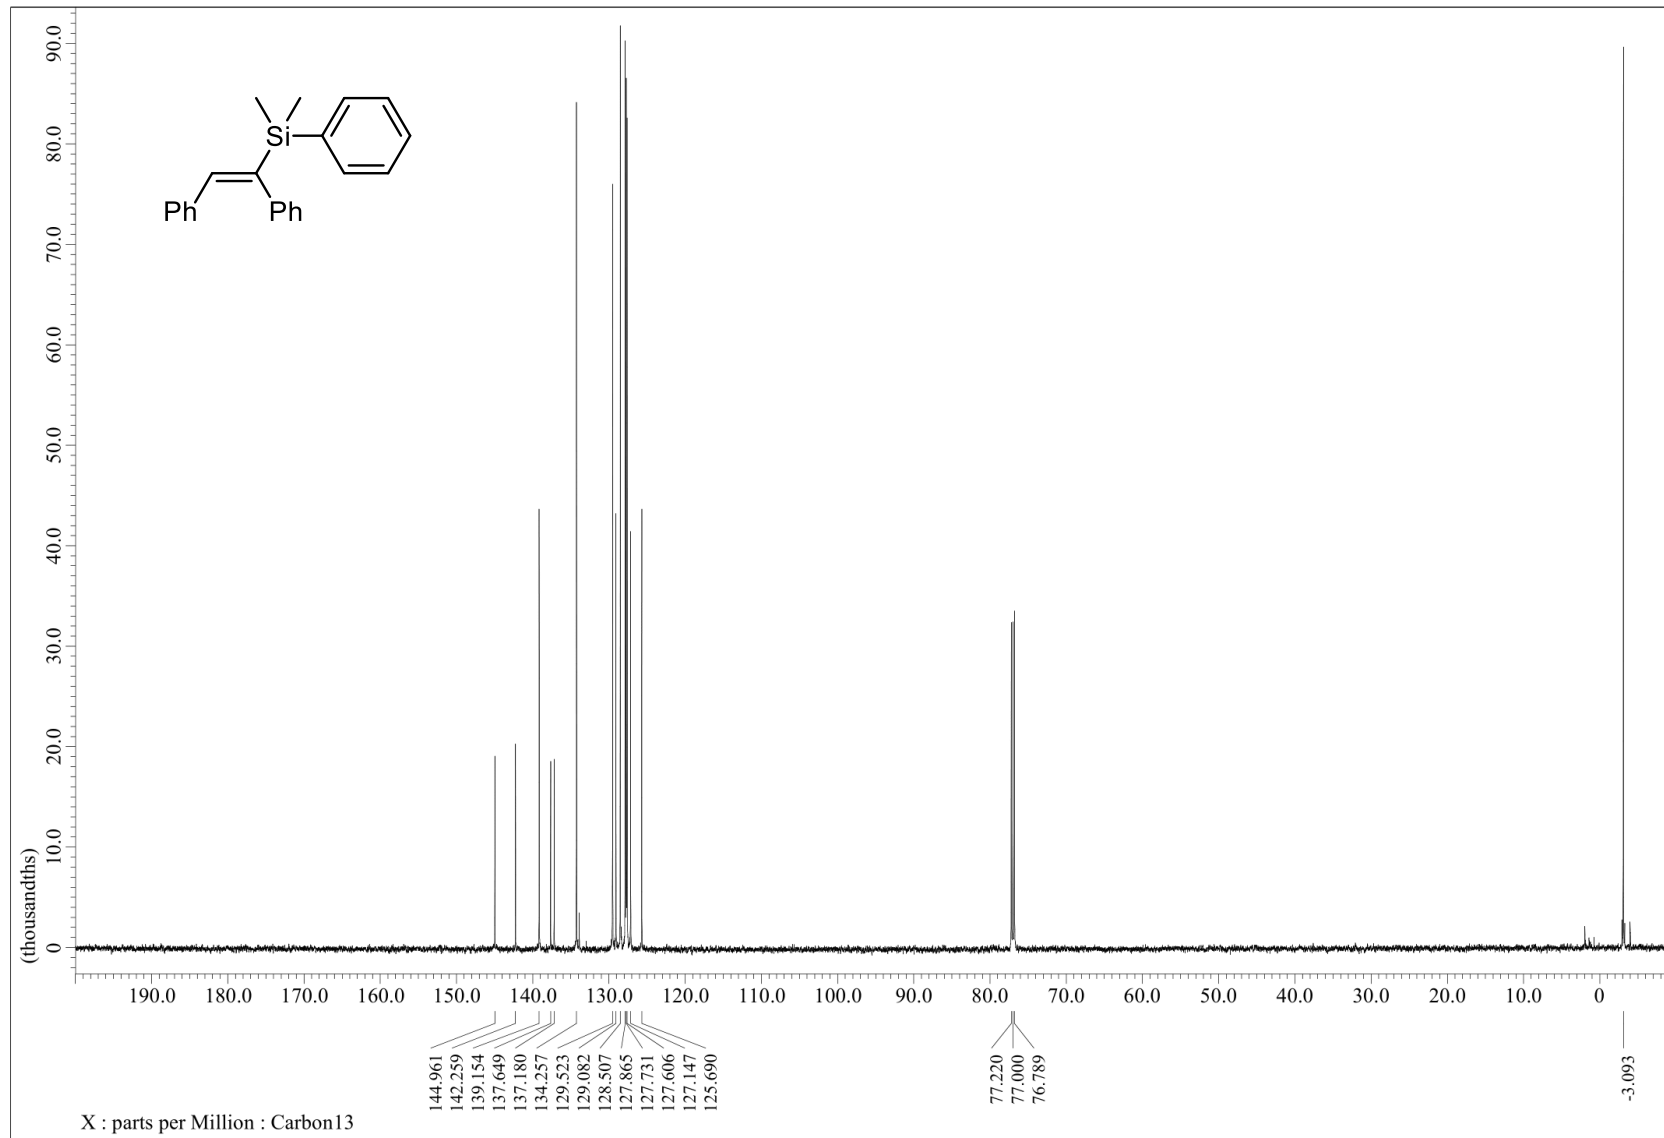

Figure S76.  $^{13}\text{C}$  NMR (151 MHz,  $\text{CDCl}_3$ ) spectrum of **3x**



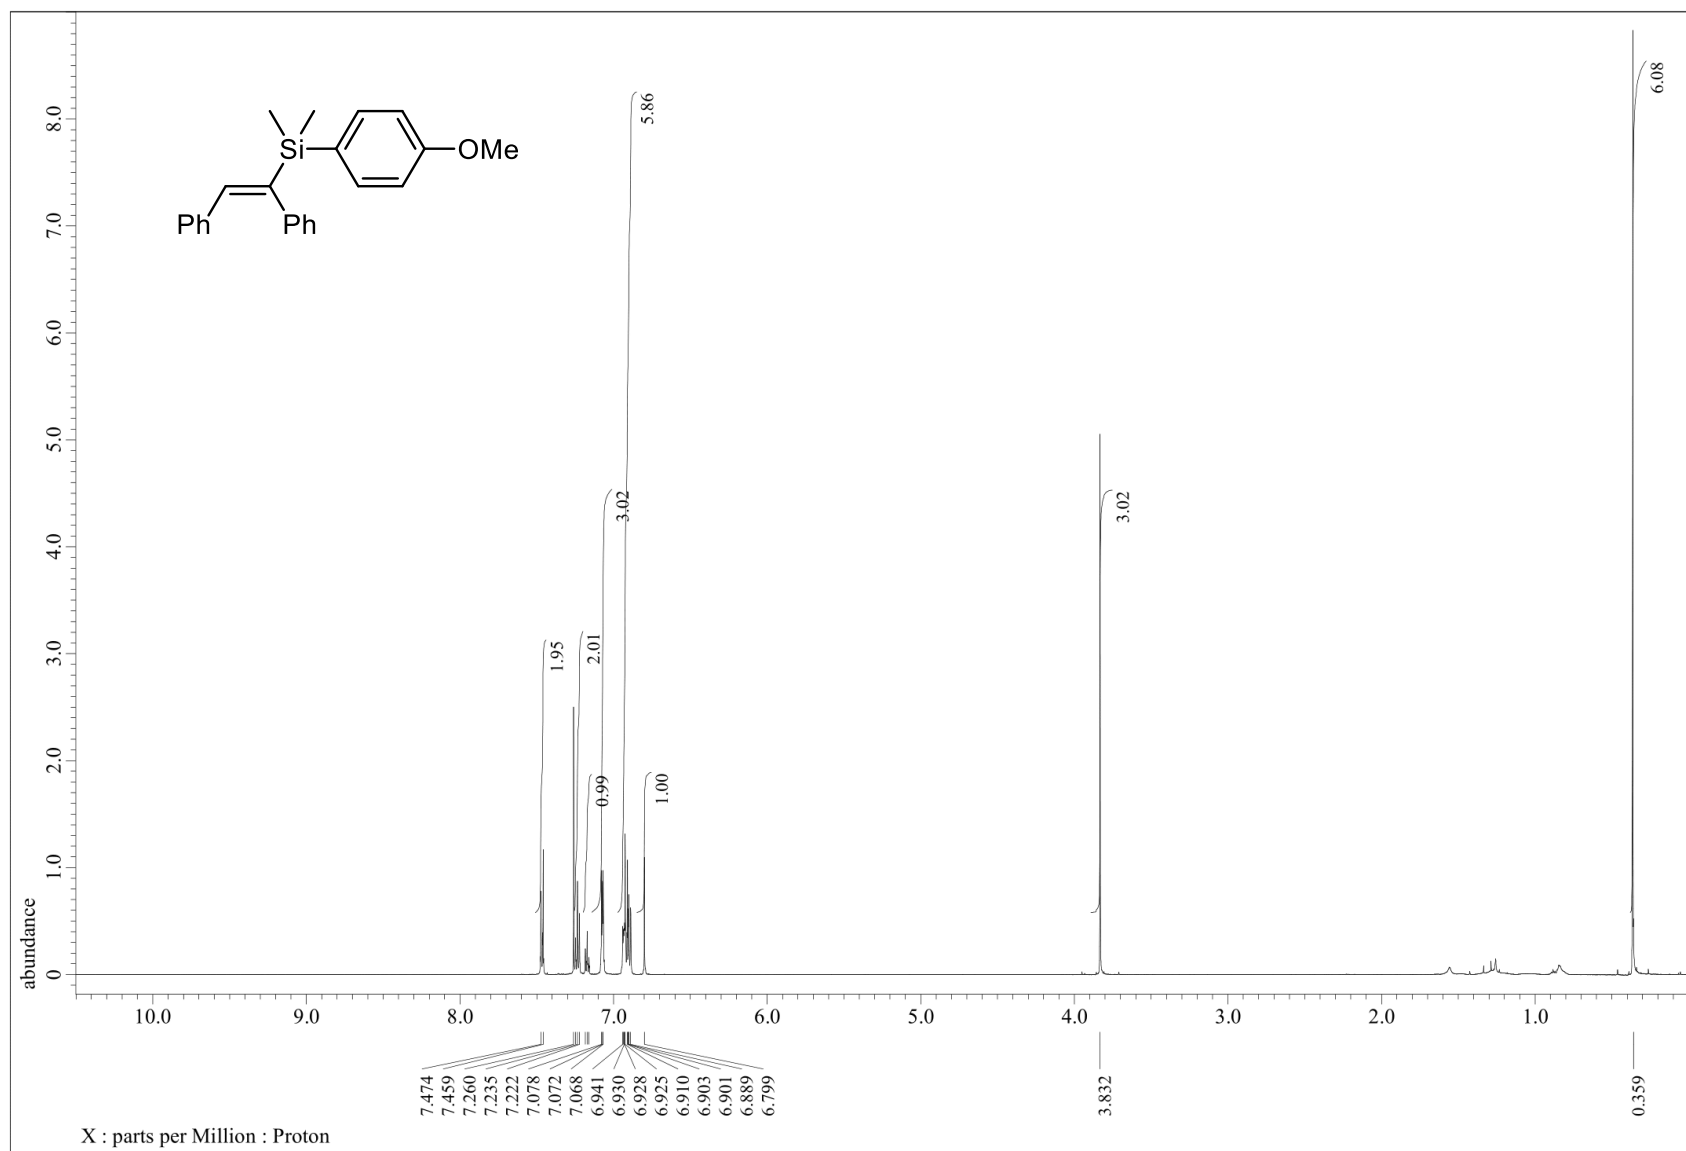

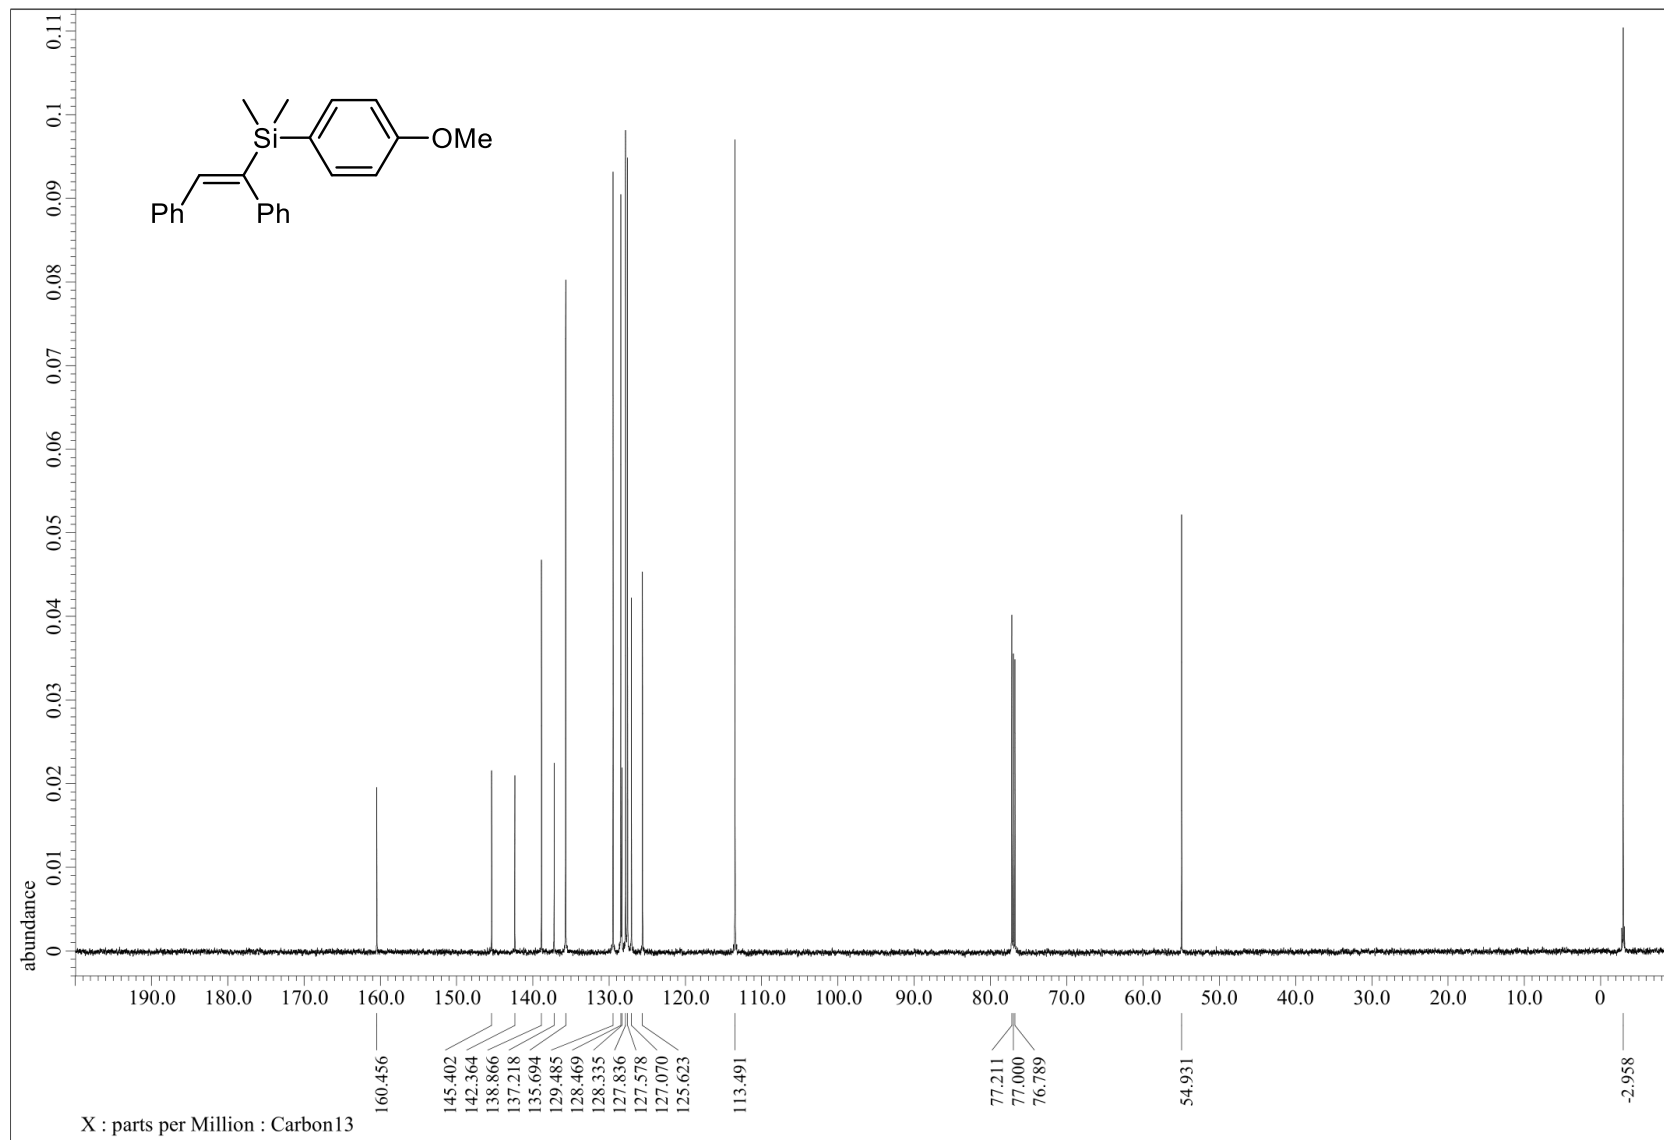

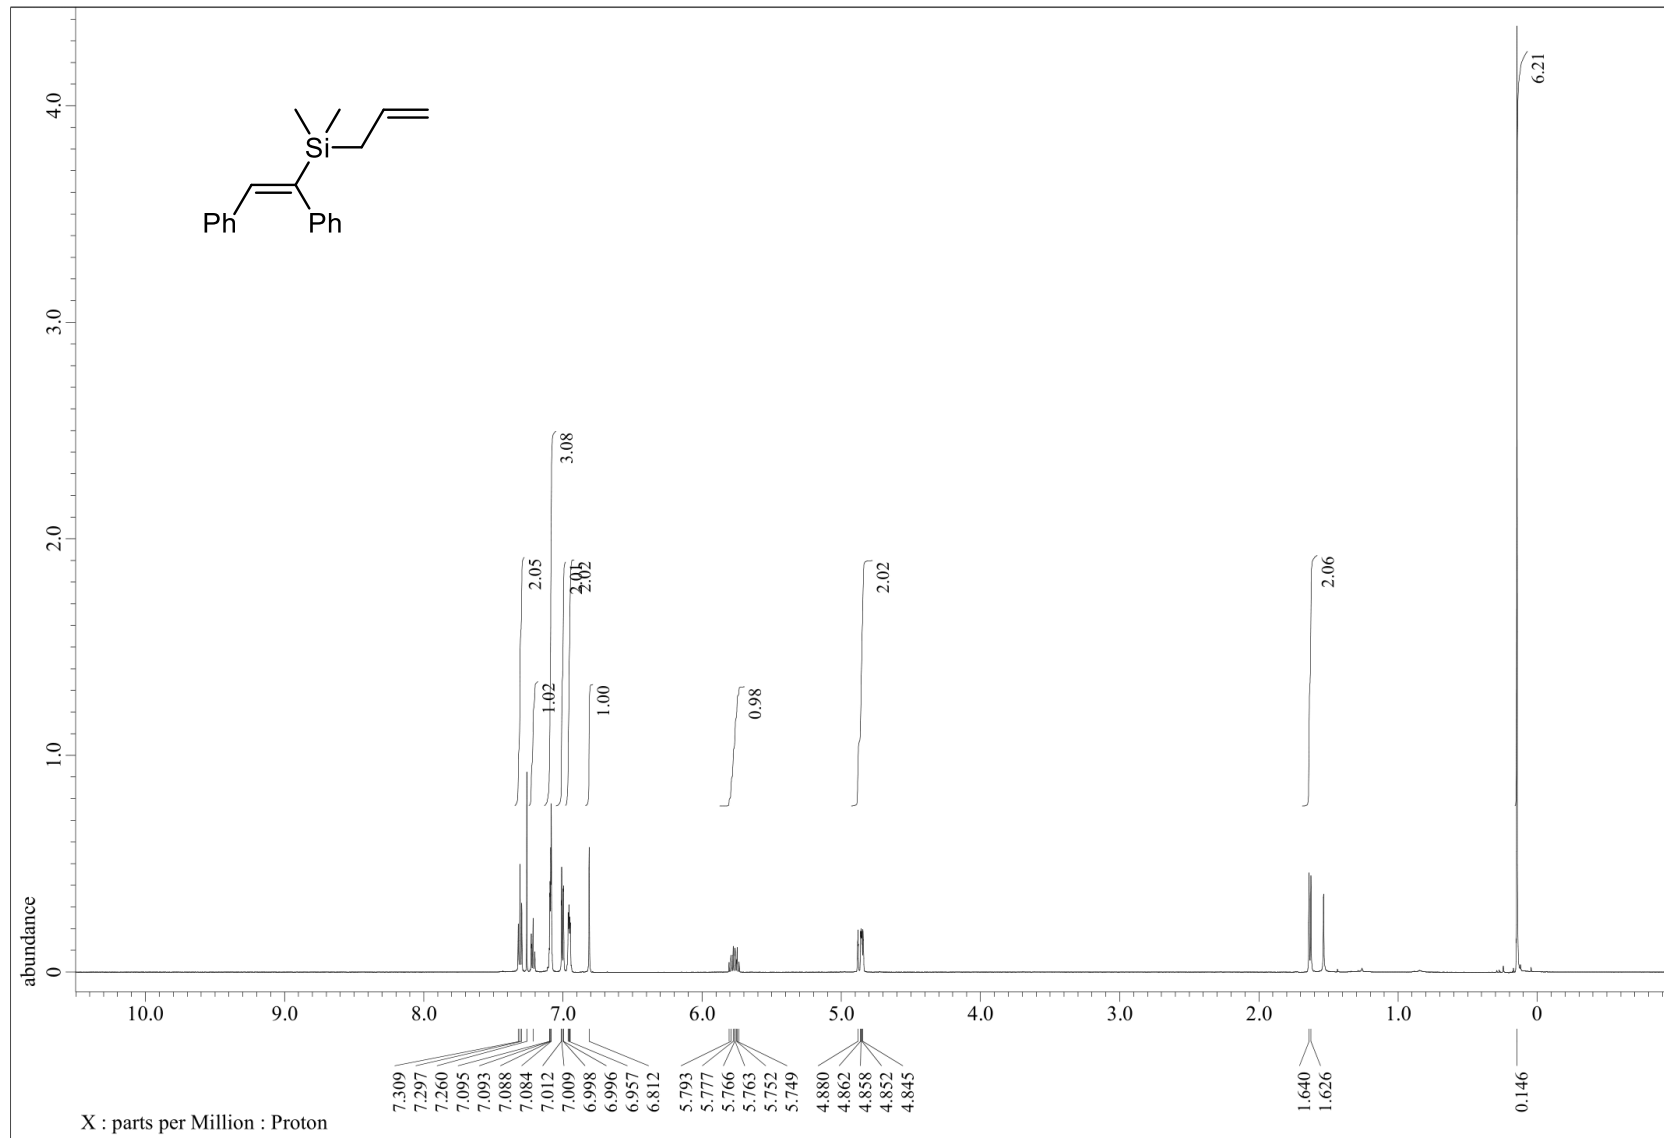

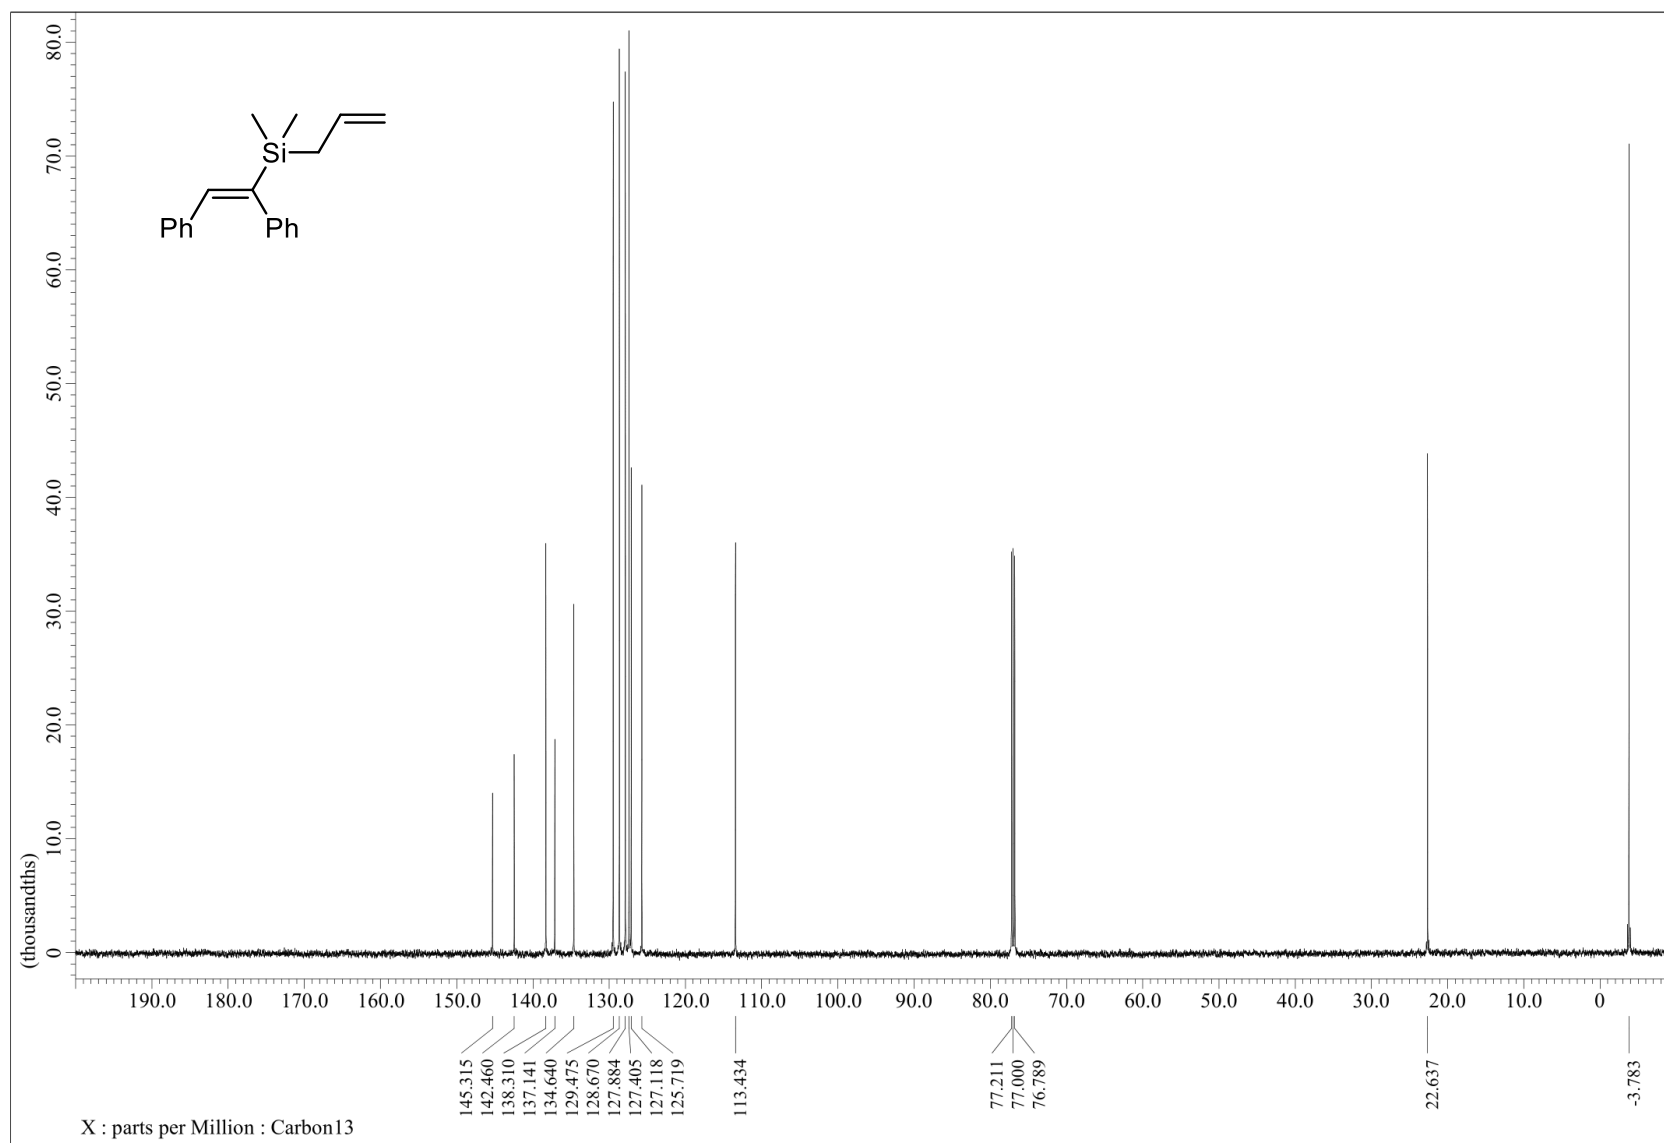

Figure S80.  $^{13}\text{C}$  NMR (151 MHz,  $\text{CDCl}_3$ ) spectrum of **3z**

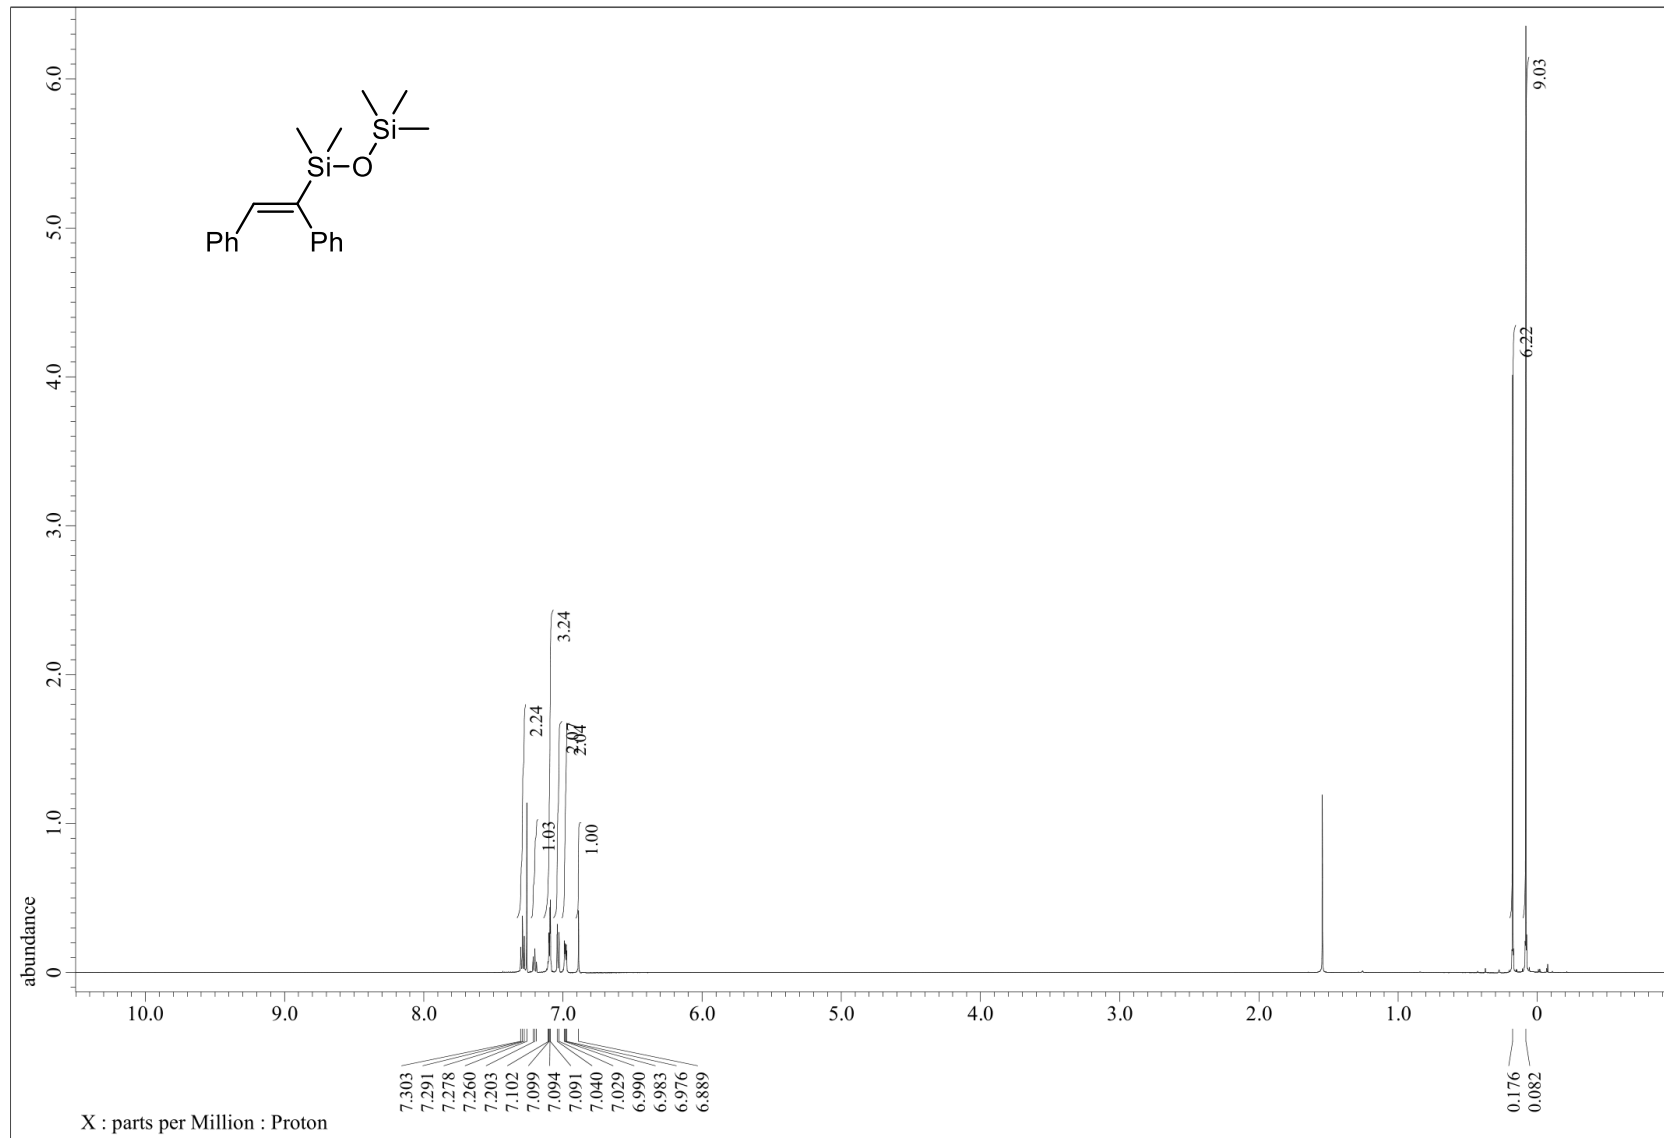

**Figure S81.** <sup>1</sup>H NMR (600 MHz, CDCl<sub>3</sub>) spectrum of **3aa**

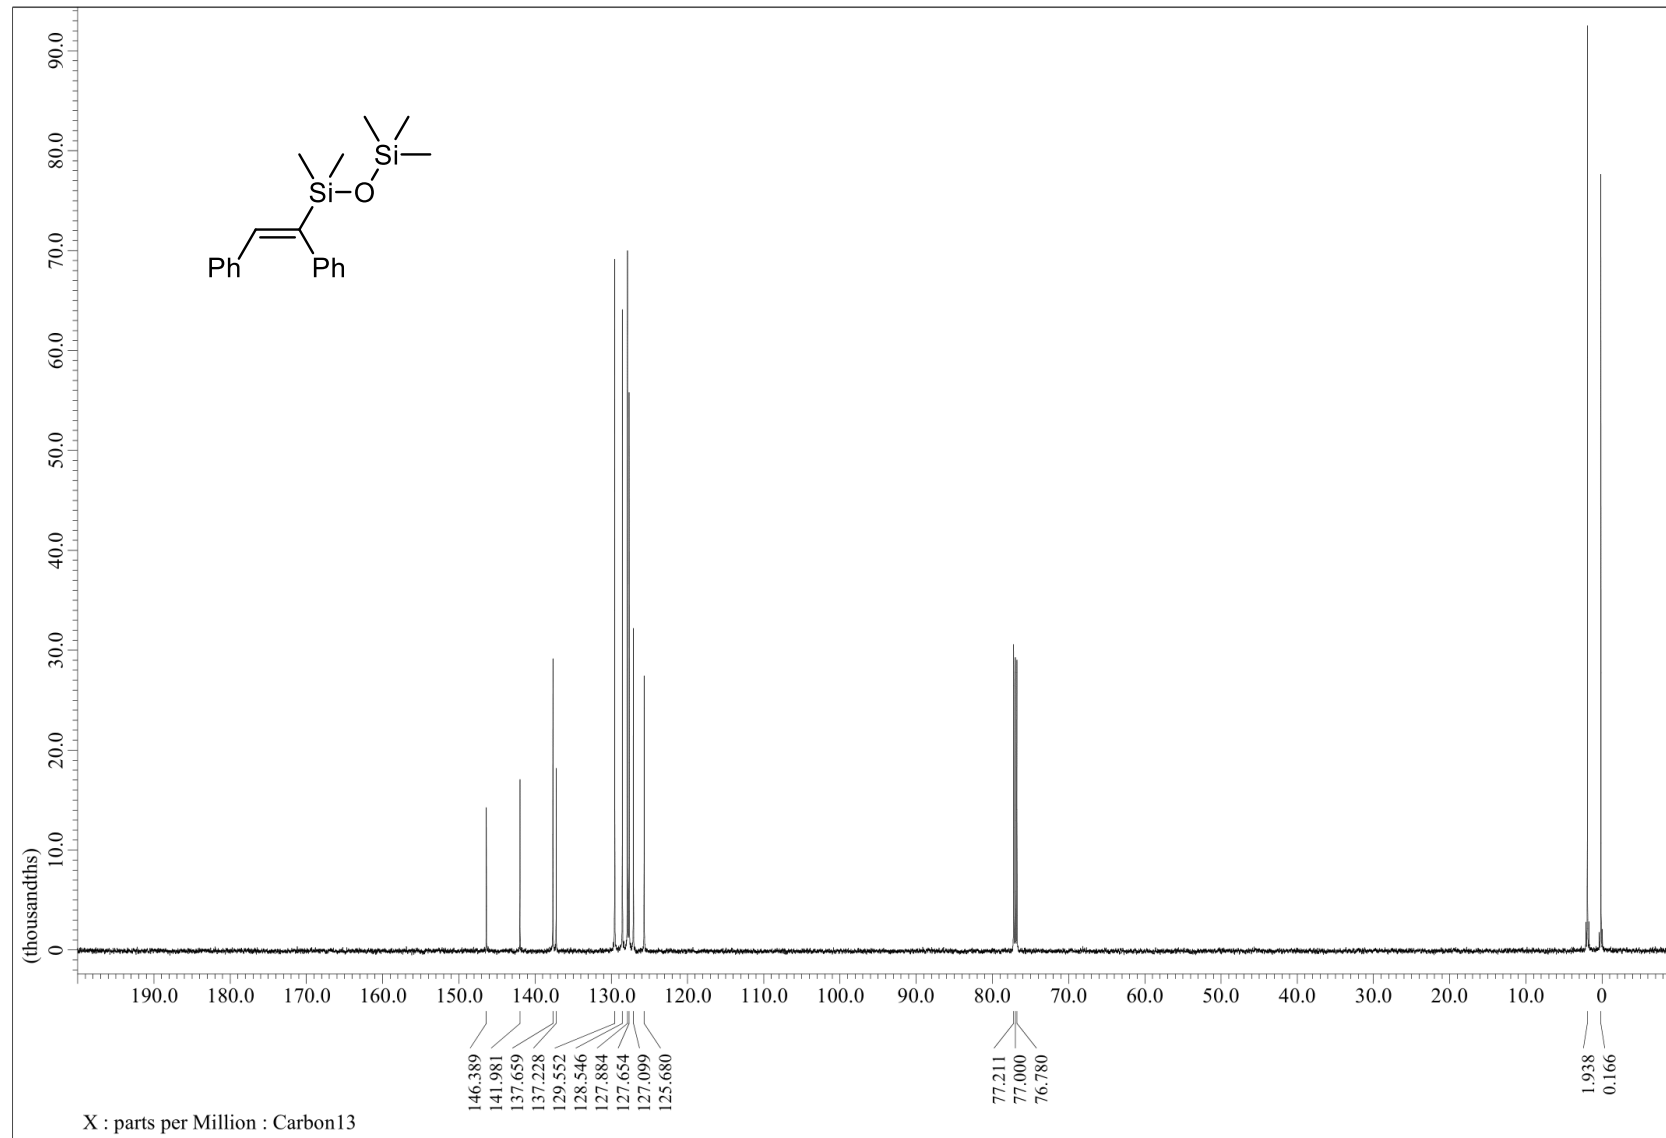

Figure S82.  $^{13}\text{C}$  NMR (151 MHz,  $\text{CDCl}_3$ ) spectrum of **3aa**
